# Supplementary material for: Synthesis and molecular modeling studies of indole-based antitumor agents
Source: Royal Society of Chemistry journal article supplement (doi:10.1039/c6ra07061b), 2016-01-01
Supplement: c6ra07061b1.pdf [file c6ra07061b1.pdf]

## Synthesis and molecular modeling studies of indole-based antitumor agents

Riham F. George,<sup>a</sup> Siva S. Panda,<sup>b</sup> El-Sayed M. Shalaby,<sup>c</sup> Aladdin M. Srour,<sup>d</sup> I. S. Ahmed Farag<sup>c</sup> and Adel S. Girgis\*<sup>e</sup>

<sup>a</sup> *Pharmaceutical Chemistry Department, Faculty of Pharmacy, Cairo University, Cairo, Egypt*

<sup>b</sup> *Department of Chemistry & Physics, Augusta University, Augusta, GA 30912, USA*

<sup>c</sup> *X-Ray Crystallography Lab., Physics Division, National Research Centre, Dokki, Giza 12622, Egypt*

<sup>d</sup> *Therapeutical Chemistry Department, National Research Centre, Dokki, Giza 12622, Egypt*

<sup>e</sup> *Pesticide Chemistry Department, National Research Centre, Dokki, Giza 12622, Egypt*

\* Corresponding author: E-mail: girgisas10@yahoo.com, Fax: +33370931, Tel: +01220447199

### Supporting information

#### Table titles

**Table S1.** Experimental and optimized intramolecular geometrical parameters (bond lengths, Å) of compounds **46** and **48**.

**Table S2.** Experimental and optimized intramolecular geometrical parameters (bond angles, °) of compounds **46** and **48**.

**Table S3.** Molecular descriptor values of the BMLR-QSAR model for the antitumor active indole-based compounds **30**, **31**, **33-40**, **42-49** and **51-63** against HeLa (cervical carcinoma) cell line.

**Table S4.** Crystal data and refinement details for compounds **46** and **48**.

#### Figure captions

**Figure S1.** IR spectrum of compound **14** (KBr pellet).

**Figure S2.**  $^1\text{H}$ -NMR spectrum of compound **14** in  $\text{CDCl}_3$ .

**Figure S3.**  $^{13}\text{C}$ -NMR spectrum of compound **14** in  $\text{CDCl}_3$ .

**Figure S4.** IR spectrum of compound **19** (KBr pellet).

**Figure S5.**  $^1\text{H}$ -NMR spectrum of compound **19** in  $\text{CDCl}_3$ .

**Figure S6.**  $^{13}\text{C}$ -NMR spectrum of compound **19** in  $\text{CDCl}_3$ .

**Figure S7.** IR spectrum of compound **30** (KBr pellet).

**Figure S8.**  $^1\text{H}$ -NMR spectrum of compound **30** in  $\text{CDCl}_3$ .

**Figure S9.**  $^{13}\text{C}$ -NMR spectrum of compound **30** in  $\text{CDCl}_3$ .

**Figure S10.** IR spectrum of compound **31** (KBr pellet).

**Figure S11.**  $^1\text{H}$ -NMR spectrum of compound **31** in  $\text{CDCl}_3$ .

**Figure S12.**  $^{13}\text{C}$ -NMR spectrum of compound **31** in  $\text{CDCl}_3$ .

**Figure S13.** IR spectrum of compound **32** (KBr pellet).

**Figure S14.**  $^1\text{H}$ -NMR spectrum of compound **32** in  $\text{CDCl}_3$ .

**Figure S15.**  $^{13}\text{C}$ -NMR spectrum of compound **32** in  $\text{CDCl}_3$ .

**Figure S16.** IR spectrum of compound **33** (KBr pellet).

**Figure S17.**  $^1\text{H}$ -NMR spectrum of compound **33** in  $\text{CDCl}_3$ .

**Figure S18.**  $^{13}\text{C}$ -NMR spectrum of compound **33** in  $\text{DMSO-}d_6$ .

**Figure S19.** IR spectrum of compound **34** (KBr pellet).

**Figure S20.**  $^1\text{H}$ -NMR spectrum of compound **34** in  $\text{CDCl}_3$ .

**Figure S21.**  $^{13}\text{C}$ -NMR spectrum of compound **34** in  $\text{CDCl}_3$ .

**Figure S22.** IR spectrum of compound **35** (KBr pellet).

**Figure S23.**  $^1\text{H}$ -NMR spectrum of compound **35** in  $\text{CDCl}_3$ .

**Figure S24.**  $^{13}\text{C}$ -NMR spectrum of compound **35** in  $\text{CDCl}_3$ .

**Figure S25.** IR spectrum of compound **36** (KBr pellet).

**Figure S26.**  $^1\text{H}$ -NMR spectrum of compound **36** in  $\text{CDCl}_3$ .

**Figure S27.**  $^{13}\text{C}$ -NMR spectrum of compound **36** in  $\text{DMSO-}d_6$ .

**Figure S28.** IR spectrum of compound **37** (KBr pellet).

**Figure S29.**  $^1\text{H}$ -NMR spectrum of compound **37** in  $\text{CDCl}_3$ .

**Figure S30.**  $^{13}\text{C}$ -NMR spectrum of compound **37** in  $\text{DMSO-}d_6$ .

**Figure S31.** IR spectrum of compound **38** (KBr pellet).

**Figure S32.**  $^1\text{H}$ -NMR spectrum of compound **38** in  $\text{CDCl}_3$ .  
**Figure S33.**  $^{13}\text{C}$ -NMR spectrum of compound **38** in  $\text{DMSO-}d_6$ .  
**Figure S34.** IR spectrum of compound **39** (KBr pellet).  
**Figure S35.**  $^1\text{H}$ -NMR spectrum of compound **39** in  $\text{CDCl}_3$ .  
**Figure S36.**  $^{13}\text{C}$ -NMR spectrum of compound **39** in  $\text{DMSO-}d_6$ .  
**Figure S37.** IR spectrum of compound **40** (KBr pellet).  
**Figure S38.**  $^1\text{H}$ -NMR spectrum of compound **40** in  $\text{CDCl}_3$ .  
**Figure S39.**  $^{13}\text{C}$ -NMR spectrum of compound **40** in  $\text{DMSO-}d_6$ .  
**Figure S40.** IR spectrum of compound **41** (KBr pellet).  
**Figure S41.**  $^1\text{H}$ -NMR spectrum of compound **41** in  $\text{CDCl}_3$ .  
**Figure S42.**  $^{13}\text{C}$ -NMR spectrum of compound **41** in  $\text{CDCl}_3$ .  
**Figure S43.** IR spectrum of compound **42** (KBr pellet).  
**Figure S44.**  $^1\text{H}$ -NMR spectrum of compound **42** in  $\text{CDCl}_3$ .  
**Figure S45.**  $^{13}\text{C}$ -NMR spectrum of compound **42** in  $\text{DMSO-}d_6$ .  
**Figure S46.** IR spectrum of compound **43** (KBr pellet).  
**Figure S47.**  $^1\text{H}$ -NMR spectrum of compound **43** in  $\text{CDCl}_3$ .  
**Figure S48.**  $^{13}\text{C}$ -NMR spectrum of compound **43** in  $\text{CDCl}_3$ .  
**Figure S49.** IR spectrum of compound **44** (KBr pellet).  
**Figure S50.**  $^1\text{H}$ -NMR spectrum of compound **44** in  $\text{CDCl}_3$ .  
**Figure S51.**  $^{13}\text{C}$ -NMR spectrum of compound **44** in  $\text{CDCl}_3$ .  
**Figure S52.** IR spectrum of compound **45** (KBr pellet).  
**Figure S53.**  $^1\text{H}$ -NMR spectrum of compound **45** in  $\text{CDCl}_3$ .  
**Figure S54.**  $^{13}\text{C}$ -NMR spectrum of compound **45** in  $\text{CDCl}_3$ .  
**Figure S55.** IR spectrum of compound **46** (KBr pellet).  
**Figure S56.**  $^1\text{H}$ -NMR spectrum of compound **46** in  $\text{CDCl}_3$ .  
**Figure S57.**  $^{13}\text{C}$ -NMR spectrum of compound **46** in  $\text{CDCl}_3$ .  
**Figure S58.** IR spectrum of compound **47** (KBr pellet).  
**Figure S59.**  $^1\text{H}$ -NMR spectrum of compound **47** in  $\text{CDCl}_3$ .  
**Figure S60.**  $^{13}\text{C}$ -NMR spectrum of compound **47** in  $\text{CDCl}_3$ .  
**Figure S61.** IR spectrum of compound **48** (KBr pellet).  
**Figure S62.**  $^1\text{H}$ -NMR spectrum of compound **48** in  $\text{CDCl}_3$ .

**Figure S63.**  $^{13}\text{C}$ -NMR spectrum of compound **48** in  $\text{CDCl}_3$ .  
**Figure S64.** IR spectrum of compound **49** (KBr pellet).  
**Figure S65.**  $^1\text{H}$ -NMR spectrum of compound **49** in  $\text{CDCl}_3$ .  
**Figure S66.**  $^{13}\text{C}$ -NMR spectrum of compound **49** in  $\text{DMSO-}d_6$ .  
**Figure S67.** IR spectrum of compound **50** (KBr pellet).  
**Figure S68.**  $^1\text{H}$ -NMR spectrum of compound **50** in  $\text{CDCl}_3$ .  
**Figure S69.**  $^{13}\text{C}$ -NMR spectrum of compound **50** in  $\text{DMSO-}d_6$ .  
**Figure S70.** IR spectrum of compound **51** (KBr pellet).  
**Figure S71.**  $^1\text{H}$ -NMR spectrum of compound **51** in  $\text{CDCl}_3$ .  
**Figure S72.**  $^{13}\text{C}$ -NMR spectrum of compound **51** in  $\text{DMSO-}d_6$ .  
**Figure S73.** IR spectrum of compound **52** (KBr pellet).  
**Figure S74.**  $^1\text{H}$ -NMR spectrum of compound **52** in  $\text{CDCl}_3$ .  
**Figure S75.**  $^{13}\text{C}$ -NMR spectrum of compound **52** in  $\text{DMSO-}d_6$ .  
**Figure S76.** IR spectrum of compound **53** (KBr pellet).  
**Figure S77.**  $^1\text{H}$ -NMR spectrum of compound **53** in  $\text{CDCl}_3$ .  
**Figure S78.**  $^{13}\text{C}$ -NMR spectrum of compound **53** in  $\text{CDCl}_3$ .  
**Figure S79.** IR spectrum of compound **54** (KBr pellet).  
**Figure S80.**  $^1\text{H}$ -NMR spectrum of compound **54** in  $\text{CDCl}_3$ .  
**Figure S81.**  $^{13}\text{C}$ -NMR spectrum of compound **54** in  $\text{CDCl}_3$ .  
**Figure S82.** IR spectrum of compound **55** (KBr pellet).  
**Figure S83.**  $^1\text{H}$ -NMR spectrum of compound **55** in  $\text{CDCl}_3$ .  
**Figure S84.**  $^{13}\text{C}$ -NMR spectrum of compound **55** in  $\text{DMSO-}d_6$ .  
**Figure S85.** IR spectrum of compound **56** (KBr pellet).  
**Figure S86.**  $^1\text{H}$ -NMR spectrum of compound **56** in  $\text{CDCl}_3$ .  
**Figure S87.**  $^{13}\text{C}$ -NMR spectrum of compound **56** in  $\text{DMSO-}d_6$ .  
**Figure S88.** IR spectrum of compound **57** (KBr pellet).  
**Figure S89.**  $^1\text{H}$ -NMR spectrum of compound **57** in  $\text{CDCl}_3$ .  
**Figure S90.**  $^{13}\text{C}$ -NMR spectrum of compound **57** in  $\text{CDCl}_3$ .  
**Figure S91.** IR spectrum of compound **58** (KBr pellet).  
**Figure S92.**  $^1\text{H}$ -NMR spectrum of compound **58** in  $\text{CDCl}_3$ .  
**Figure S93.**  $^{13}\text{C}$ -NMR spectrum of compound **58** in  $\text{DMSO-}d_6$ .

**Figure S94.** IR spectrum of compound **59** (KBr pellet).

**Figure S95.**  $^1\text{H}$ -NMR spectrum of compound **59** in  $\text{CDCl}_3$ .

**Figure S96.**  $^{13}\text{C}$ -NMR spectrum of compound **59** in  $\text{DMSO-}d_6$ .

**Figure S97.** IR spectrum of compound **60** (KBr pellet).

**Figure S98.**  $^1\text{H}$ -NMR spectrum of compound **60** in  $\text{CDCl}_3$ .

**Figure S99.**  $^{13}\text{C}$ -NMR spectrum of compound **60** in  $\text{CDCl}_3$ .

**Figure S100.** IR spectrum of compound **61** (KBr pellet).

**Figure S101.**  $^1\text{H}$ -NMR spectrum of compound **61** in  $\text{CDCl}_3$ .

**Figure S102.** IR spectrum of compound **62** (KBr pellet).

**Figure S103.**  $^1\text{H}$ -NMR spectrum of compound **62** in  $\text{CDCl}_3$ .

**Figure S104.**  $^{13}\text{C}$ -NMR spectrum of compound **62** in  $\text{DMSO-}d_6$ .

**Figure S105.** IR spectrum of compound **63** (KBr pellet).

**Figure S106.**  $^1\text{H}$ -NMR spectrum of compound **63** in  $\text{CDCl}_3$ .

**Figure S107.**  $^{13}\text{C}$ -NMR spectrum of compound **63** in  $\text{CDCl}_3$ .

**Figure 108.** A projection of the optimized structure of compound **46** by semi-empirical AM1.

**Figure 109.** A projection of the optimized structure of compound **46** by semi-empirical PM3.

**Figure 110.** A projection of the optimized structure of compound **48** by semi-empirical AM1.

**Figure 111.** A projection of the optimized structure of compound **48** by semi-empirical PM3.

**Figure 112.** Overlay diagram of compound **46**, drawn so that the central pyrrolidine rings are overlapped (red, X-ray; green, AM1; and blue, PM3).

**Figure 113.** Overlay diagram of compound **48**, drawn so that the central pyrrolidine rings are overlapped (red, X-ray; green, AM1; and blue, PM3).

**Figure 114.** Dose-response curve for the synthesized compounds **30-63** against HeLa (cervical cancer) cell line.

**Figure 115.** Dose-response curve for the synthesized compounds **30-63** against HepG2 (liver cancer) cell line.

**Figure S116.** (A) Constraint distances “H – PosIon-1 = 9.375, H – PosIon-2 = 4.037, H – HBA = 6.763, PosIon-1 – PosIon-2 = 5.848, PosIon-1 – HBA = 3.869, PosIon-2 – HBA = 4.300 Å” and (B) constraint angles “H – PosIon-1 – PosIon-2 = 15.24, H – PosIon-1 – HBA = 47.33, PosIon-2 – H – PosIon-1 = 37.11 °” of the generated 3D-pharmacophore for the synthesized bio-active spiro-compounds **30-63** against HeLa (cervical carcinoma) cell line which contains two positive ionizables (PosIon-1, PosIon-2; red), one hydrophobic (H; light blue) and one hydrogen bonding acceptor (HBA; green).

**Figure S117.** 3D-pharmacophore mapped on the synthesized bio-active spiro-compounds **30-63** against HeLa (cervical carcinoma) cell line.

**Table S1.** Experimental and optimized intramolecular geometrical parameters (bond lengths, Å) of compounds **46** and **48**.

| Geometric parameters | Compound <b>46</b> |       |       | Compound <b>48</b> |       |       |
|----------------------|--------------------|-------|-------|--------------------|-------|-------|
|                      | Exp. X-ray         | AM1   | PM3   | Exp. X-ray         | AM1   | PM3   |
| F1—C21               | 1.366              | 1.354 | 1.343 | 1.388              | 1.354 | 1.343 |
| F2—C31               | 1.376              | 1.354 | 1.343 | 1.374              | 1.354 | 1.343 |
| C1—C2                | 1.519              | 1.524 | 1.519 | 1.517              | 1.524 | 1.519 |
| C1—C14               | 1.554              | 1.582 | 1.562 | 1.559              | 1.582 | 1.562 |
| C1—C24               | 1.585              | 1.575 | 1.578 | 1.575              | 1.575 | 1.578 |
| C1—N1                | 1.472              | 1.473 | 1.508 | 1.445              | 1.473 | 1.508 |
| C2—C3                | 1.356              | 1.381 | 1.384 | 1.384              | 1.381 | 1.384 |
| C2—C7                | 1.391              | 1.432 | 1.412 | 1.389              | 1.432 | 1.412 |
| C3—C4                | 1.398              | 1.403 | 1.397 | 1.411              | 1.403 | 1.397 |
| C4—C5                | 1.362              | 1.391 | 1.390 | 1.326              | 1.391 | 1.390 |
| C5—C6                | 1.369              | 1.400 | 1.396 | 1.400              | 1.400 | 1.396 |
| C6—C7                | 1.381              | 1.395 | 1.389 | 1.355              | 1.395 | 1.389 |
| C7—N3                | 1.402              | 1.409 | 1.437 | 1.386              | 1.409 | 1.437 |
| C8—N3                | 1.492              | 1.445 | 1.478 | 1.528              | 1.445 | 1.479 |
| C8—N4                | 1.455              | 1.472 | 1.493 | 1.454              | 1.472 | 1.493 |
| C9—C10               | 1.500              | 1.530 | 1.526 | 1.511              | 1.530 | 1.526 |
| C9—N4                | 1.413              | 1.457 | 1.488 | 1.472              | 1.457 | 1.488 |

|         |       |       |       |       |       |       |
|---------|-------|-------|-------|-------|-------|-------|
| C10—C11 | 1.512 | 1.515 | 1.521 | 1.459 | 1.515 | 1.521 |
| C11—C12 | 1.504 | 1.514 | 1.521 | 1.476 | 1.514 | 1.521 |
| C12—C13 | 1.489 | 1.530 | 1.526 | 1.492 | 1.530 | 1.526 |
| C13—N4  | 1.450 | 1.454 | 1.488 | 1.423 | 1.454 | 1.488 |
| C14—O1  | 1.213 | 1.238 | 1.217 | 1.223 | 1.238 | 1.218 |
| C14—N3  | 1.372 | 1.407 | 1.437 | 1.377 | 1.407 | 1.437 |
| C15—N1  | 1.454 | 1.439 | 1.471 | 1.474 | 1.439 | 1.471 |
| C16—C17 | 1.532 | 1.538 | 1.528 | 1.517 | 1.538 | 1.528 |
| C16—N1  | 1.462 | 1.457 | 1.482 | 1.416 | 1.457 | 1.482 |
| C17—C18 | 1.508 | 1.489 | 1.502 | 1.497 | 1.489 | 1.502 |
| C17—C24 | 1.575 | 1.558 | 1.567 | 1.565 | 1.558 | 1.567 |
| C18—C19 | 1.380 | 1.400 | 1.397 | 1.389 | 1.400 | 1.397 |
| C18—C23 | 1.388 | 1.404 | 1.398 | 1.374 | 1.404 | 1.398 |
| C19—C20 | 1.390 | 1.391 | 1.388 | 1.385 | 1.391 | 1.388 |
| C20—C21 | 1.368 | 1.406 | 1.400 | 1.347 | 1.406 | 1.400 |
| C21—C22 | 1.340 | 1.407 | 1.400 | 1.343 | 1.407 | 1.400 |
| C22—C23 | 1.406 | 1.390 | 1.389 | 1.360 | 1.390 | 1.389 |
| C24—C25 | 1.537 | 1.525 | 1.542 | 1.528 | 1.525 | 1.542 |
| C24—C35 | 1.530 | 1.538 | 1.541 | 1.546 | 1.538 | 1.541 |
| C25—C26 | 1.492 | 1.483 | 1.496 | 1.482 | 1.483 | 1.496 |



|                    |       |        |        |       |        |        |
|--------------------|-------|--------|--------|-------|--------|--------|
| C25—O2             | 1.207 | 1.239  | 1.217  | 1.213 | 1.239  | 1.217  |
| C26—C27            | 1.332 | 1.347  | 1.343  | 1.324 | 1.347  | 1.343  |
| C26—C34            | 1.512 | 1.498  | 1.493  | 1.489 | 1.498  | 1.493  |
| C27—C28            | 1.477 | 1.454  | 1.462  | 1.461 | 1.454  | 1.462  |
| C28—C29            | 1.383 | 1.401  | 1.397  | 1.385 | 1.401  | 1.397  |
| C28—C33            | 1.406 | 1.405  | 1.400  | 1.419 | 1.405  | 1.400  |
| C29—C30            | 1.399 | 1.391  | 1.388  | 1.367 | 1.391  | 1.388  |
| C30—C31            | 1.350 | 1.406  | 1.400  | 1.377 | 1.406  | 1.400  |
| C31—C32            | 1.345 | 1.408  | 1.401  | 1.343 | 1.408  | 1.401  |
| C32—C33            | 1.384 | 1.389  | 1.388  | 1.391 | 1.389  | 1.388  |
| C34—N2             | 1.467 | 1.454  | 1.487  | 1.462 | 1.453  | 1.487  |
| C35—N2             | 1.465 | 1.452  | 1.485  | 1.466 | 1.452  | 1.485  |
| C36—C37            | 1.504 | 1.520  | 1.517  | 1.524 | 1.528  | 1.527  |
| C36—N2             | 1.469 | 1.452  | 1.487  | 1.476 | 1.450  | 1.485  |
| C37—C38            | ---   | ---    | ---    | 1.460 | 1.506  | 1.512  |
| RMSE               | ---   | 0.0256 | 0.0269 | ---   | 0.0312 | 0.0329 |
| Maximum difference | ---   | 0.067  | 0.075  | ---   | 0.083  | 0.066  |

**Table S2.** Experimental and optimized intramolecular geometrical parameters (bond angles, °) of compounds **46** and **48**.

| Geometric parameters | Compound <b>46</b> |       |       | Compound <b>48</b> |       |       |
|----------------------|--------------------|-------|-------|--------------------|-------|-------|
|                      | Exp. X-ray         | AM1   | PM3   | Exp. X-ray         | AM1   | PM3   |
| C2—C1—C14            | 102.2              | 100.7 | 100.9 | 99.5               | 100.7 | 100.9 |
| C2—C1—C24            | 117.8              | 113.7 | 114.4 | 119.5              | 113.7 | 114.4 |
| C14—C1—C24           | 110.6              | 112.4 | 114.7 | 111.7              | 112.4 | 114.7 |
| C2—C1—N1             | 109.2              | 110.1 | 107.5 | 110.7              | 110.1 | 107.5 |
| C14—C1—N1            | 114.5              | 112.0 | 113.1 | 112.7              | 112.0 | 113.1 |
| C24—C1—N1            | 103.0              | 107.9 | 106.2 | 103.1              | 107.9 | 106.2 |
| C1—C2—C3             | 132.4              | 129.9 | 129.1 | 130                | 129.9 | 129.1 |
| C1—C2—C7             | 108.3              | 109.6 | 110.8 | 110.1              | 109.6 | 110.8 |
| C3—C2—C7             | 118.9              | 120.4 | 120.0 | 119.5              | 120.4 | 120.0 |
| C2—C3—C4             | 120.3              | 118.9 | 118.7 | 118.1              | 118.9 | 118.7 |
| C3—C4—C5             | 119.2              | 120.7 | 120.9 | 121                | 120.7 | 120.9 |
| C4—C5—C6             | 122.1              | 121.5 | 121.1 | 121.3              | 121.5 | 121.1 |
| C5—C6—C7             | 117.7              | 118.1 | 117.8 | 118.4              | 118.1 | 117.8 |
| C2—C7—C6             | 121.7              | 120.4 | 121.5 | 121.6              | 120.4 | 121.5 |
| C2—C7—N3             | 110.4              | 110.4 | 110.0 | 110.6              | 110.4 | 110.0 |
| C6—C7—N3             | 127.7              | 129.1 | 128.6 | 127.7              | 129.1 | 128.6 |
| N3—C8—N4             | 118.7              | 116.3 | 108.6 | 116.6              | 116.3 | 108.6 |

|             |       |       |       |       |       |       |
|-------------|-------|-------|-------|-------|-------|-------|
| C10—C9—N4   | 112.3 | 115.4 | 113.5 | 110.8 | 115.4 | 113.5 |
| C9—C10—C11  | 111.5 | 110.7 | 110.8 | 112.8 | 110.7 | 110.8 |
| C10—C11—C12 | 109.6 | 111.2 | 110.9 | 112.9 | 111.2 | 110.9 |
| C11—C12—C13 | 112.2 | 111.1 | 111.1 | 113.8 | 111.1 | 111.1 |
| C12—C13—N4  | 109.5 | 115.6 | 113.8 | 109.8 | 115.6 | 113.8 |
| C1—C14—O1   | 126.4 | 126.6 | 129.1 | 126.9 | 126.6 | 129.1 |
| C1—C14—N3   | 107.5 | 109.1 | 109.0 | 109.7 | 109.1 | 109.0 |
| O1—C14—N3   | 126.1 | 124.0 | 121.8 | 123.4 | 124.0 | 121.8 |
| C17—C16—N1  | 103.9 | 107.0 | 104.0 | 105.8 | 107.0 | 104.0 |
| C16—C17—C18 | 115.4 | 113.7 | 113.0 | 114.4 | 113.7 | 113.0 |
| C16—C17—C24 | 104.8 | 105.0 | 104.6 | 103.2 | 105.0 | 104.7 |
| C18—C17—C24 | 116.3 | 116.5 | 116.0 | 117.3 | 116.5 | 116.0 |
| C17—C18—C19 | 122.5 | 122.9 | 121.5 | 124.6 | 122.9 | 121.5 |
| C17—C18—C23 | 119.2 | 118.3 | 119.2 | 117.5 | 118.3 | 119.2 |
| C19—C18—C23 | 118.3 | 118.8 | 119.3 | 117.9 | 118.8 | 119.3 |
| C18—C19—C20 | 121.1 | 121.0 | 121.0 | 120.8 | 121.0 | 121.0 |
| C19—C20—C21 | 118.6 | 119.6 | 118.9 | 117.8 | 119.6 | 118.9 |
| C20—C21—C22 | 122.4 | 120.0 | 121.0 | 123.1 | 120.0 | 121.0 |
| C20—C21—F1  | 117.6 | 120.0 | 119.5 | 117.1 | 120.0 | 119.5 |
| C22—C21—F1  | 120.0 | 120.0 | 119.5 | 119.5 | 120.0 | 119.5 |

|             |       |       |       |       |       |       |
|-------------|-------|-------|-------|-------|-------|-------|
| C21—C22—C23 | 119.1 | 119.4 | 119.1 | 119   | 119.4 | 119.1 |
| C22—C23—C18 | 120.4 | 121.1 | 120.7 | 121.2 | 121.1 | 120.7 |
| C17—C24—C1  | 103.7 | 103.8 | 103.3 | 104.1 | 103.8 | 103.3 |
| C17—C24—C25 | 110.2 | 110.0 | 111.5 | 111.5 | 110.0 | 111.5 |
| C1—C24—C25  | 108.4 | 111.5 | 111.8 | 108.7 | 111.5 | 111.8 |
| C17—C24—C35 | 113.6 | 110.0 | 109.2 | 113.2 | 110.0 | 109.2 |
| C1—C24—C35  | 113.5 | 113.0 | 114.3 | 112.3 | 113.0 | 114.3 |
| C25—C24—C35 | 107.3 | 108.4 | 106.7 | 107   | 108.4 | 106.6 |
| C24—C25—C26 | 117.1 | 118.1 | 117.3 | 118.9 | 118.1 | 117.3 |
| C24—C25—O2  | 122.6 | 121.4 | 122.4 | 120   | 121.4 | 122.4 |
| C26—C25—O2  | 120.3 | 120.5 | 120.3 | 121   | 120.5 | 120.2 |
| C25—C26—C27 | 117.7 | 118.7 | 119.2 | 117.4 | 118.7 | 119.2 |
| C25—C26—C34 | 119.8 | 118.4 | 115.9 | 118.2 | 118.4 | 115.9 |
| C27—C26—C34 | 122.4 | 122.9 | 124.9 | 124.4 | 122.9 | 124.9 |
| C26—C27—C28 | 128.2 | 127.0 | 127.6 | 126.5 | 127.0 | 127.6 |
| C27—C28—C29 | 123.6 | 122.1 | 122.2 | 125.3 | 122.1 | 122.2 |
| C27—C28—C33 | 119.2 | 118.8 | 118.2 | 118.2 | 118.8 | 118.2 |
| C29—C28—C33 | 117.2 | 119.2 | 119.5 | 116.5 | 119.2 | 119.5 |
| C28—C29—C30 | 121.6 | 120.9 | 120.8 | 122.2 | 120.9 | 120.8 |
| C29—C30—C31 | 117.4 | 119.5 | 119.0 | 118.6 | 119.5 | 119.0 |

|             |       |       |       |       |       |       |
|-------------|-------|-------|-------|-------|-------|-------|
| C30—C31—C32 | 124.4 | 120.2 | 121.1 | 123.3 | 120.2 | 121.1 |
| C30—C31—F2  | 117.3 | 119.9 | 119.5 | 118.1 | 119.9 | 119.5 |
| C32—C31—F2  | 118.2 | 119.9 | 119.4 | 118.5 | 119.9 | 119.4 |
| C31—C32—C33 | 117.9 | 119.5 | 119.0 | 117.8 | 119.5 | 119.0 |
| C28—C33—C32 | 121.3 | 120.8 | 120.6 | 121.7 | 120.8 | 120.6 |
| C26—C34—N2  | 111.5 | 113.5 | 110.7 | 112.2 | 113.5 | 110.6 |
| C24—C35—N2  | 109.8 | 112.5 | 112.2 | 109   | 112.5 | 112.1 |
| C37—C36—N2  | 113.5 | 117.8 | 116.4 | 110.3 | 117.7 | 116.3 |
| C1—N1—C16   | 106.0 | 109.3 | 108.7 | 106.7 | 109.3 | 108.7 |
| C1—N1—C15   | 114.4 | 116.7 | 118.6 | 115.7 | 116.7 | 118.6 |
| C16—N1—C15  | 113.9 | 114.4 | 114.5 | 114.7 | 114.4 | 114.5 |
| C36—N2—C34  | 111.4 | 113.9 | 113.6 | 113.1 | 114.1 | 113.7 |
| C36—N2—C35  | 113.4 | 113.8 | 113.7 | 111.8 | 113.9 | 113.9 |
| C34—N2—C35  | 107.8 | 112.1 | 112.6 | 108   | 112.1 | 112.6 |
| C8—N3—C7    | 124.1 | 125.5 | 122.6 | 123.3 | 125.5 | 122.6 |
| C8—N3—C14   | 123.3 | 124.3 | 124.3 | 125.4 | 124.4 | 124.3 |
| C7—N3—C14   | 111.5 | 110.1 | 108.3 | 110.1 | 110.1 | 108.3 |
| C8—N4—C13   | 113.7 | 114.6 | 114.4 | 112.7 | 111.7 | 114.4 |
| C8—N4—C9    | 114.3 | 111.7 | 113.6 | 117.3 | 114.6 | 113.5 |
| C13—N4—C9   | 111.7 | 111.3 | 111.7 | 111.8 | 111.3 | 111.7 |

|                    |     |        |        |       |        |        |
|--------------------|-----|--------|--------|-------|--------|--------|
| C36—C37—C38        | --- | ---    | ---    | 113.3 | 110.4  | 110.6  |
| RMSE               | --- | 2.0361 | 2.3048 | ---   | 2.1406 | 2.2722 |
| Maximum difference | --- | 6.1    | 10.1   | ---   | 7.4    | 8.0    |

**Table S3.** Molecular descriptor values of the BMLR-QSAR model for the antitumor active indole-based compounds **30**, **31**, **33-40**, **42-49** and **51-63** against HeLa (cervical carcinoma) cell line.

| Entry | Compd.    | Descriptors <sup>a</sup> |                |                |                |                |
|-------|-----------|--------------------------|----------------|----------------|----------------|----------------|
|       |           | D <sub>1</sub>           | D <sub>2</sub> | D <sub>3</sub> | D <sub>4</sub> | D <sub>5</sub> |
| 1     | <b>30</b> | 3                        | 136.7752       | 0              | 198.5068       | 0              |
| 2     | <b>31</b> | 3                        | 136.6096       | 0              | 198.9305       | 0              |
| 3     | <b>33</b> | 3                        | 136.7861       | 0              | 200.3036       | 0              |
| 4     | <b>34</b> | 3                        | 136.3403       | 0              | 198.6065       | 0              |
| 5     | <b>35</b> | 3                        | 136.6457       | 0              | 198.5477       | 0              |
| 6     | <b>36</b> | 3                        | 136.6001       | 0              | 199.3658       | 0              |
| 7     | <b>37</b> | 3                        | 136.8132       | 0              | 200.4607       | 0              |
| 8     | <b>38</b> | 3                        | 136.7001       | 0              | 200.1806       | 0              |
| 9     | <b>39</b> | 3                        | 136.6039       | 0              | 199.6096       | 0              |
| 10    | <b>40</b> | 3                        | 136.7263       | 0              | 200.3751       | 0              |
| 11    | <b>42</b> | 3                        | 136.4878       | 0              | 199.1451       | 0              |
| 12    | <b>43</b> | 3                        | 136.3863       | 2              | 199.4495       | 0              |
| 13    | <b>44</b> | 3                        | 136.3733       | 2              | 199.6382       | 0              |
| 14    | <b>45</b> | 3                        | 136.608        | 2              | 198.6234       | 0              |
| 15    | <b>46</b> | 3                        | 136.4379       | 2              | 199.2208       | 0              |
| 16    | <b>47</b> | 3                        | 136.5666       | 2              | 199.5591       | 0              |
| 17    | <b>48</b> | 3                        | 136.7948       | 2              | 199.3765       | 0              |
| 18    | <b>49</b> | 3                        | 136.7274       | 2              | 200.4381       | 0              |
| 19    | <b>51</b> | 3                        | 136.8106       | 2              | 199.4803       | 0              |
| 20    | <b>52</b> | 3                        | 136.4403       | 0              | 199.0356       | 0              |
| 21    | <b>53</b> | 3                        | 136.6514       | 0              | 200.3557       | 0              |
| 22    | <b>54</b> | 3                        | 136.5028       | 0              | 198.4583       | 0              |
| 23    | <b>55</b> | 3                        | 136.8162       | 0              | 200.0913       | 0              |
| 24    | <b>56</b> | 3                        | 136.3108       | 0              | 199.4149       | 0              |
| 25    | <b>57</b> | 3                        | 136.6281       | 0              | 200.6326       | 0              |
| 26    | <b>58</b> | 3                        | 136.3404       | 0              | 200.0663       | 0              |

|    |           |   |          |   |          |          |
|----|-----------|---|----------|---|----------|----------|
| 27 | <b>59</b> | 3 | 136.7904 | 0 | 199.6677 | 0        |
| 28 | <b>60</b> | 7 | 136.4145 | 0 | 199.7037 | 0        |
| 29 | <b>61</b> | 7 | 136.0955 | 0 | 198.4843 | 0        |
| 30 | <b>62</b> | 9 | 136.6493 | 0 | 199.747  | 68.44892 |
| 31 | <b>63</b> | 9 | 136.4786 | 0 | 198.6001 | 0        |

---

<sup>a</sup>  $D_1$  = Number of double bonds,  $D_2$  = Max. n-n repulsion for bond C-C,  $D_3$  = Number of F atoms,  $D_4$  = Max. e-e repulsion for bond C-O,  $D_5$  = HBSA H-bonding surface area (MOPAC PC).



**Table S4.** Crystal data and refinement details for compounds **46** and **48**.

| Parameter                                                                    | Compd. <b>46</b>                                                             | Compd. <b>48</b>                                                             |
|------------------------------------------------------------------------------|------------------------------------------------------------------------------|------------------------------------------------------------------------------|
| Chemical formula                                                             | C <sub>37</sub> H <sub>40</sub> F <sub>2</sub> N <sub>4</sub> O <sub>2</sub> | C <sub>38</sub> H <sub>42</sub> F <sub>2</sub> N <sub>4</sub> O <sub>2</sub> |
| $M_r$                                                                        | 610.73                                                                       | 624.76                                                                       |
| Crystal system, space group                                                  | Monoclinic, $P2_1/c$                                                         | Monoclinic, $P2_1/c$                                                         |
| $a, b, c$ (Å)                                                                | 12.1284 (4), 15.8117 (6), 17.2351 (7)                                        | 12.3371 (4), 16.2079 (7), 17.0271 (9)                                        |
| $\beta$ (°)                                                                  | 101.641 (2)                                                                  | 100.522 (2)                                                                  |
| $V$ (Å <sup>3</sup> )                                                        | 3237.2 (2)                                                                   | 3347.5 (3)                                                                   |
| $Z$                                                                          | 4                                                                            | 4                                                                            |
| $\mu$ (mm <sup>-1</sup> )                                                    | 0.09                                                                         | 0.09                                                                         |
| Crystal size (mm)                                                            | 0.16 × 0.15 × 0.12                                                           | 0.25 × 0.18 × 0.15                                                           |
| Crystal color                                                                | Colorless                                                                    | Colorless                                                                    |
| No. of measured, independent and observed [ $I > 2.0\sigma(I)$ ] reflections | 10280, 9953, 4135                                                            | 14424, 8040, 4203                                                            |
| $R_{\text{int}}$                                                             | 0.056                                                                        | 0.044                                                                        |
| $R[F^2 > 2\sigma(F^2)], wR(F^2), S$                                          | 0.052, 0.093, 1.10                                                           | 0.068, 0.131, 1.01                                                           |
| No. of reflections, parameters                                               | 4135, 406                                                                    | 4203, 415                                                                    |
| $\Delta\rho_{\text{max}}, \Delta\rho_{\text{min}}$ (e Å <sup>-3</sup> )      | 0.24, -0.25                                                                  | 0.24, -0.31                                                                  |
| CCDC Number                                                                  | CCDC 1455157                                                                 | CCDC 1455158                                                                 |

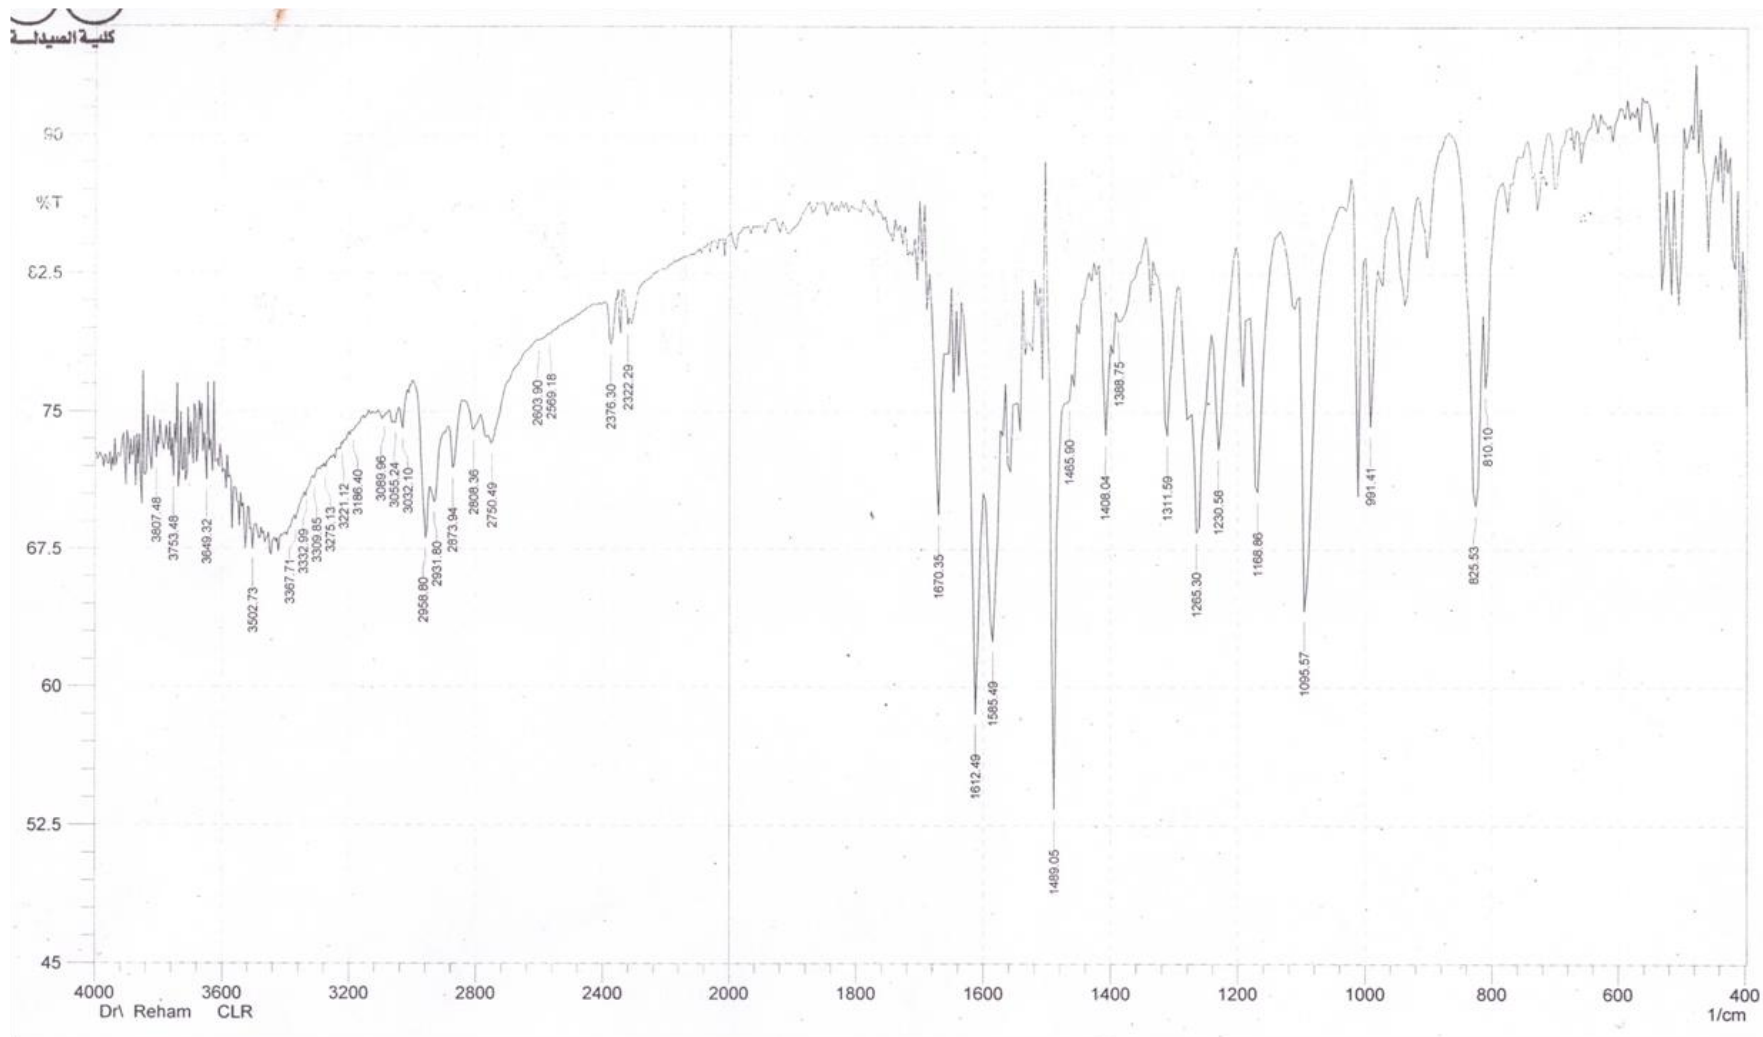

**Figure S1.** IR spectrum of compound **14** (KBr pellet).

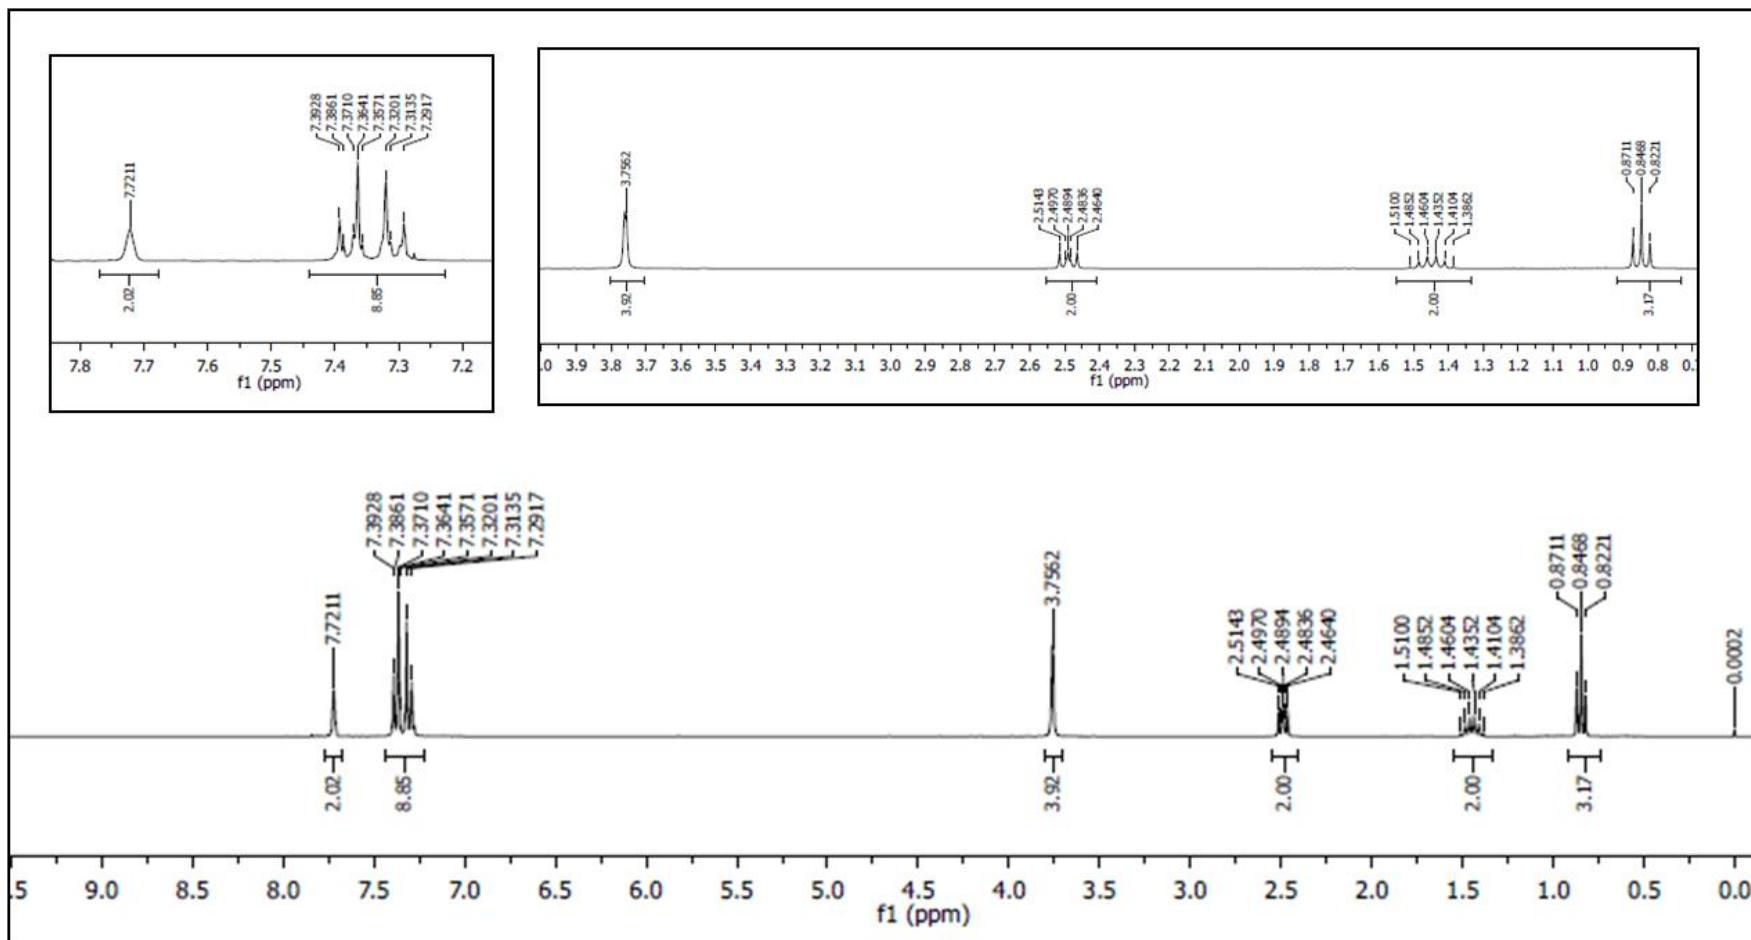

**Figure S2.** <sup>1</sup>H-NMR spectrum of compound **14** in CDCl<sub>3</sub>.

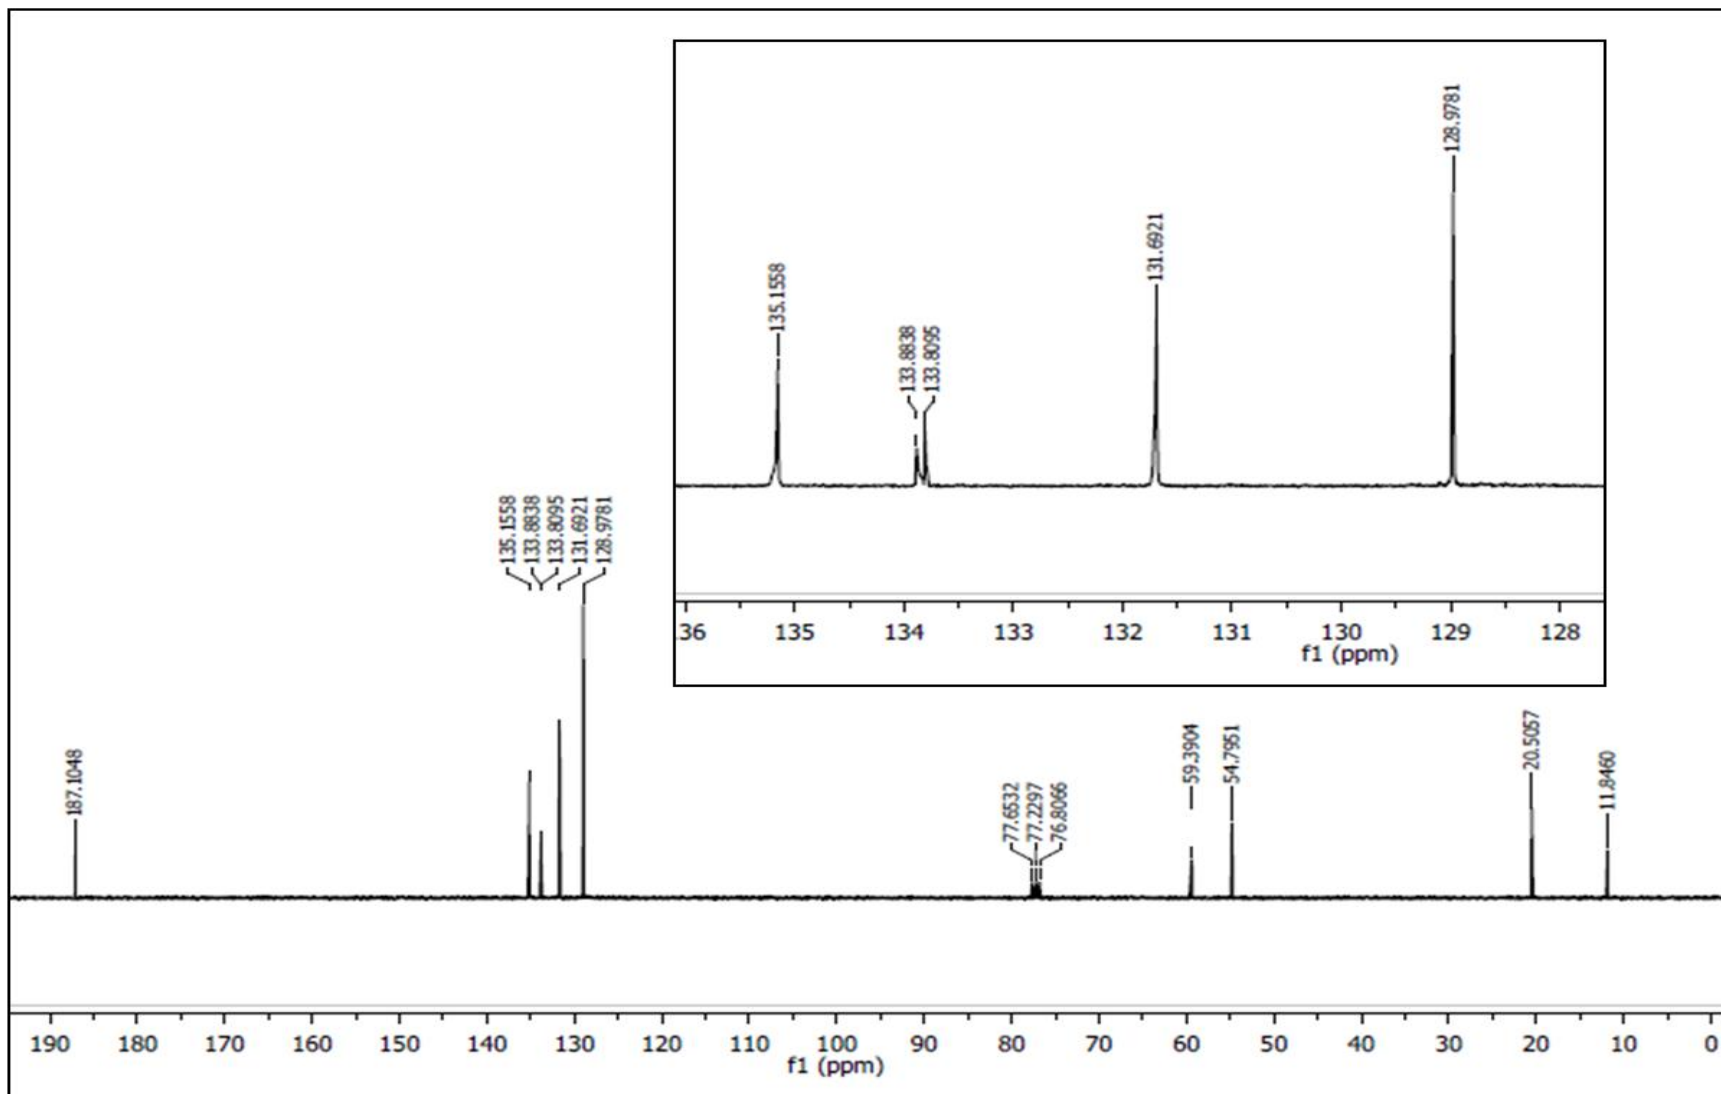

**Figure S3.**  $^{13}\text{C}$ -NMR spectrum of compound **14** in  $\text{CDCl}_3$ .

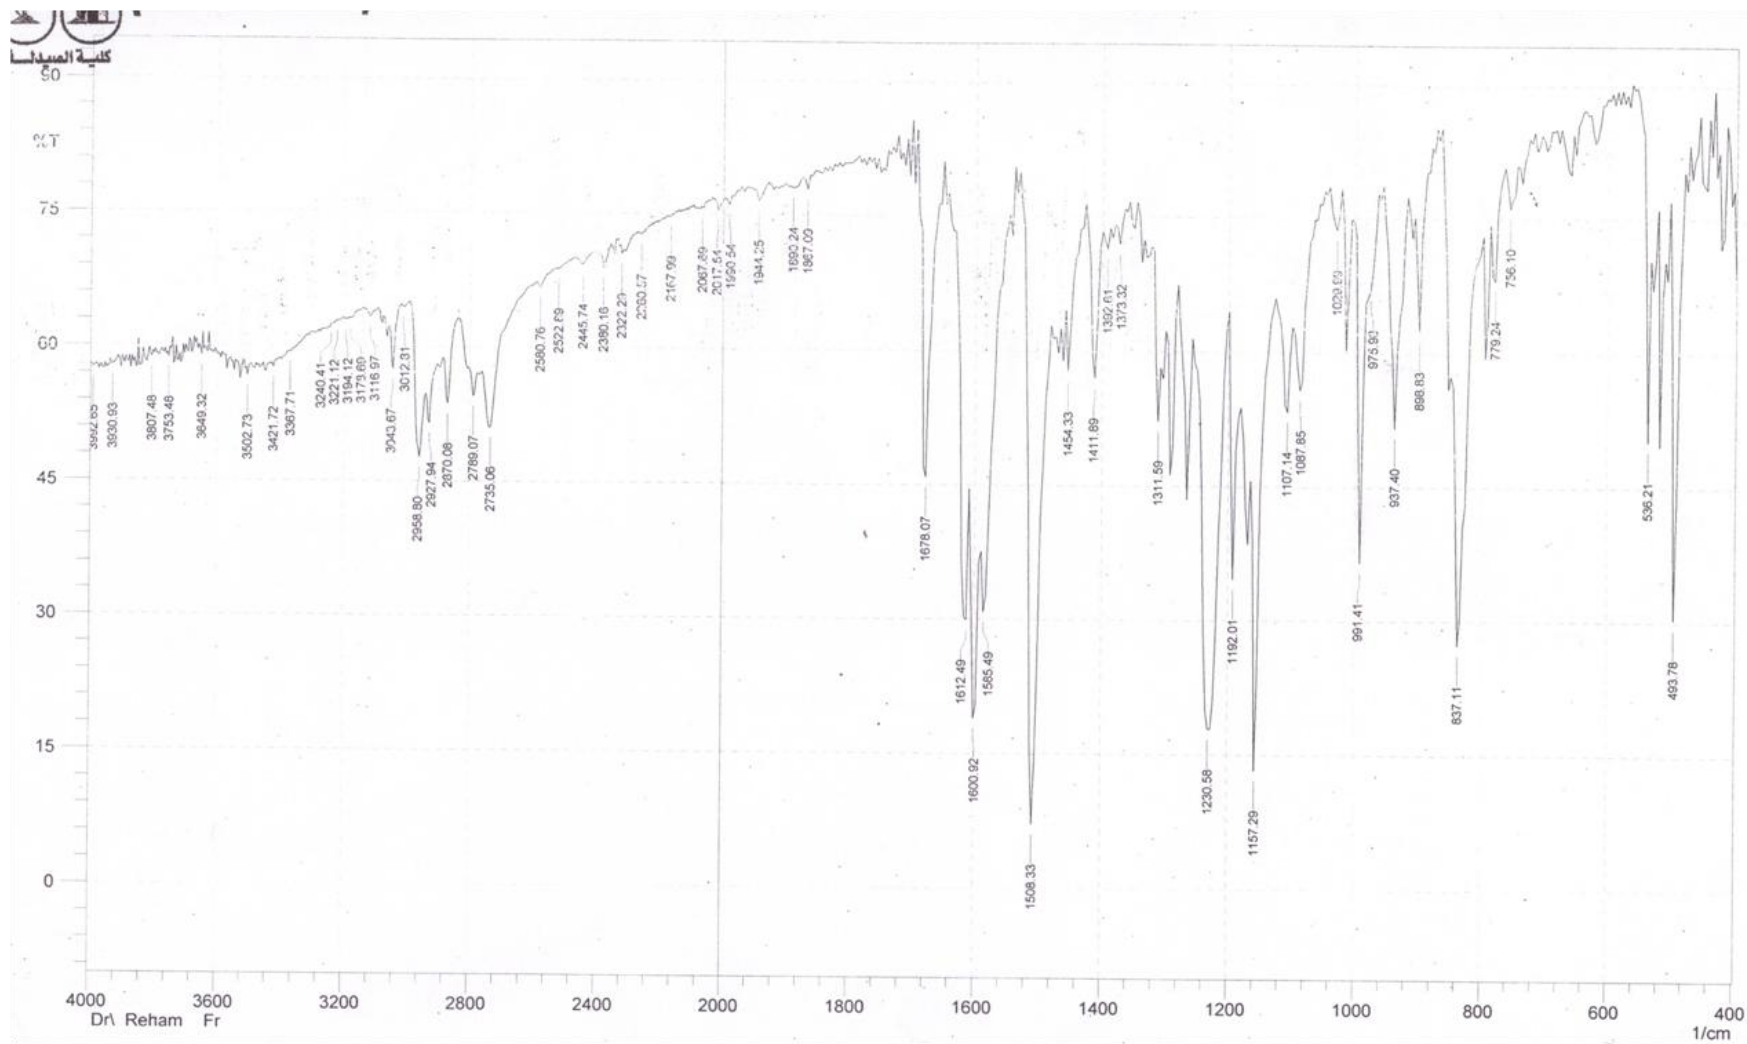

Figure S4. IR spectrum of compound 19 (KBr pellet).

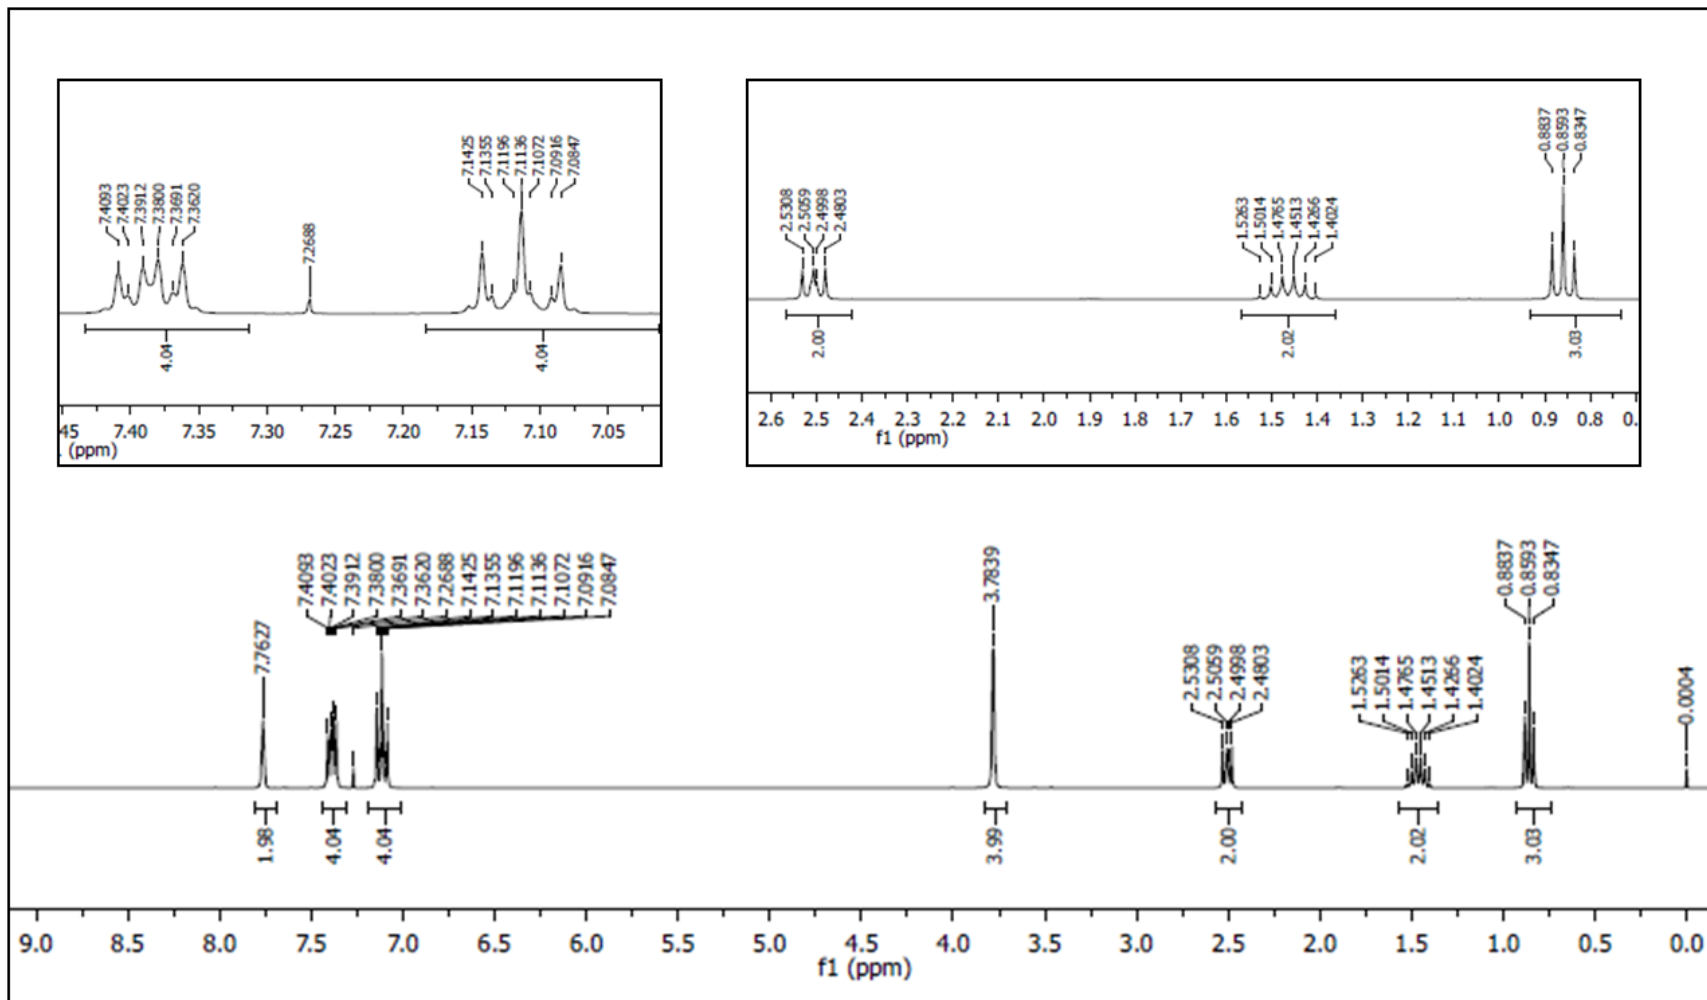

Figure S5. <sup>1</sup>H-NMR spectrum of compound **19** in CDCl<sub>3</sub>.

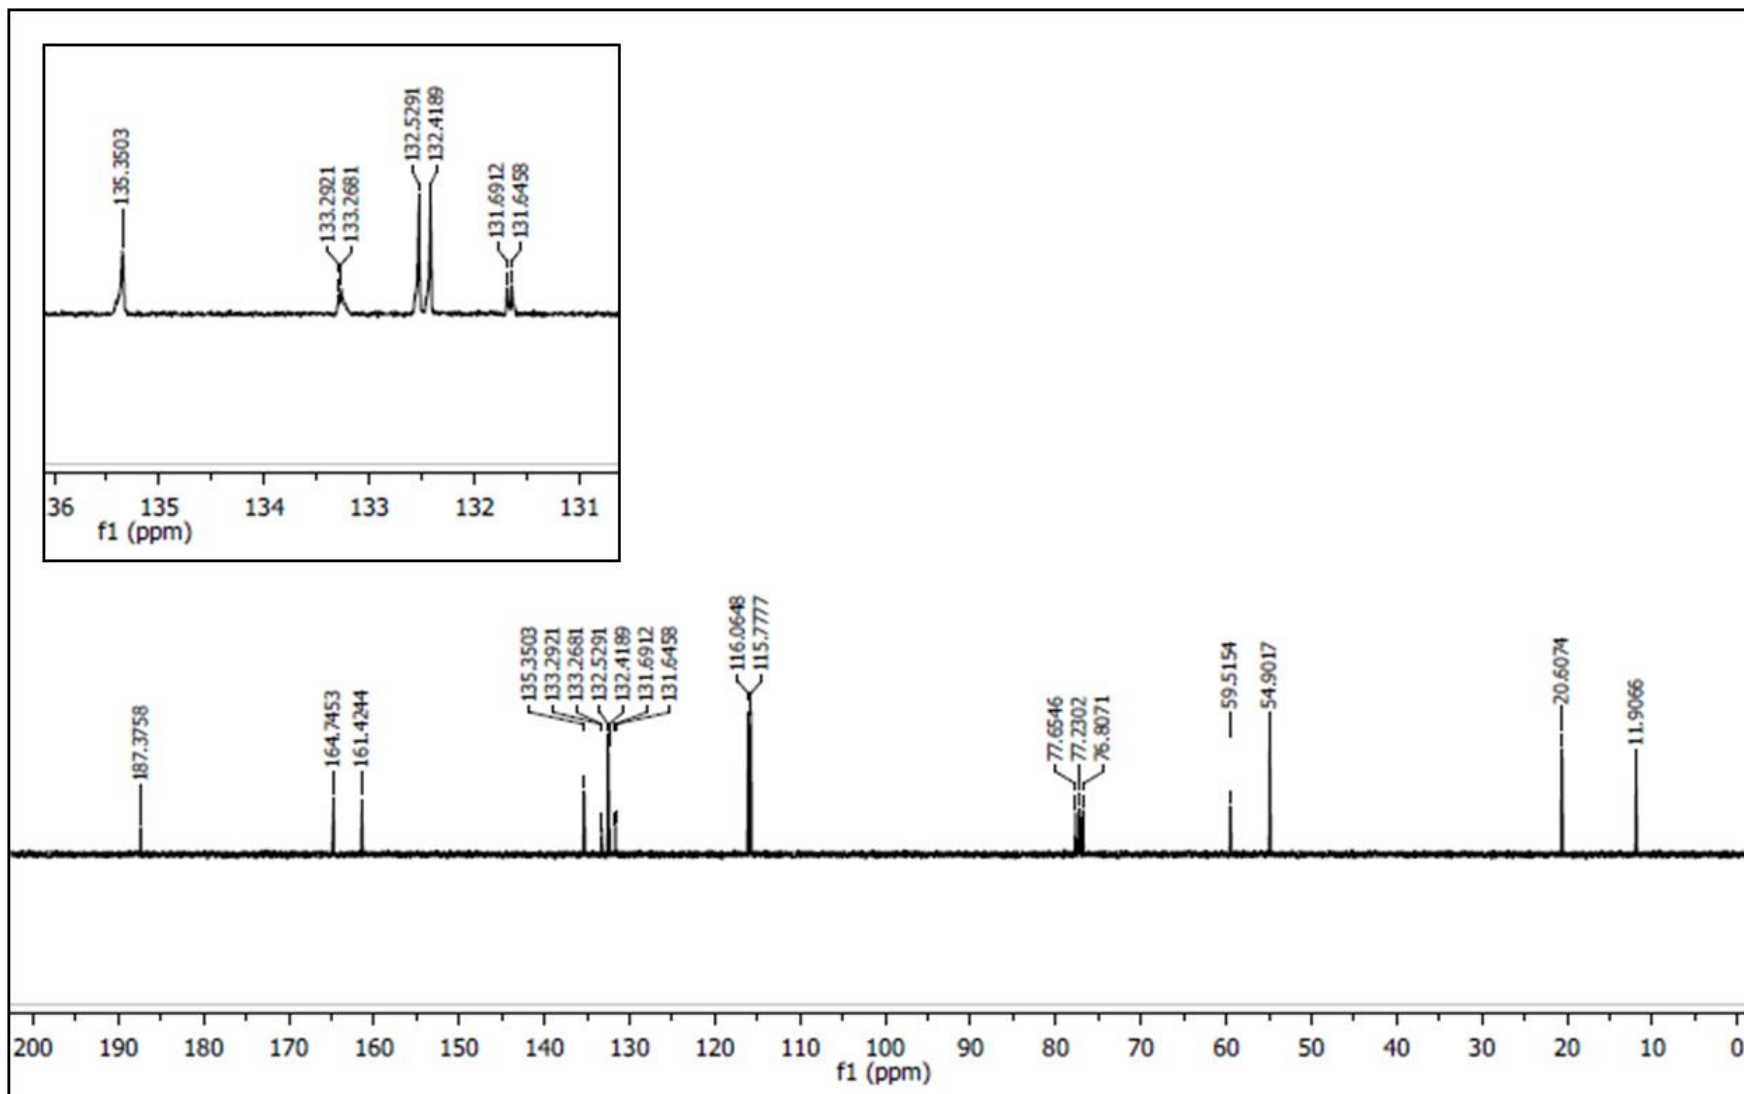

**Figure S6.**  $^{13}\text{C}$ -NMR spectrum of compound **19** in  $\text{CDCl}_3$ .

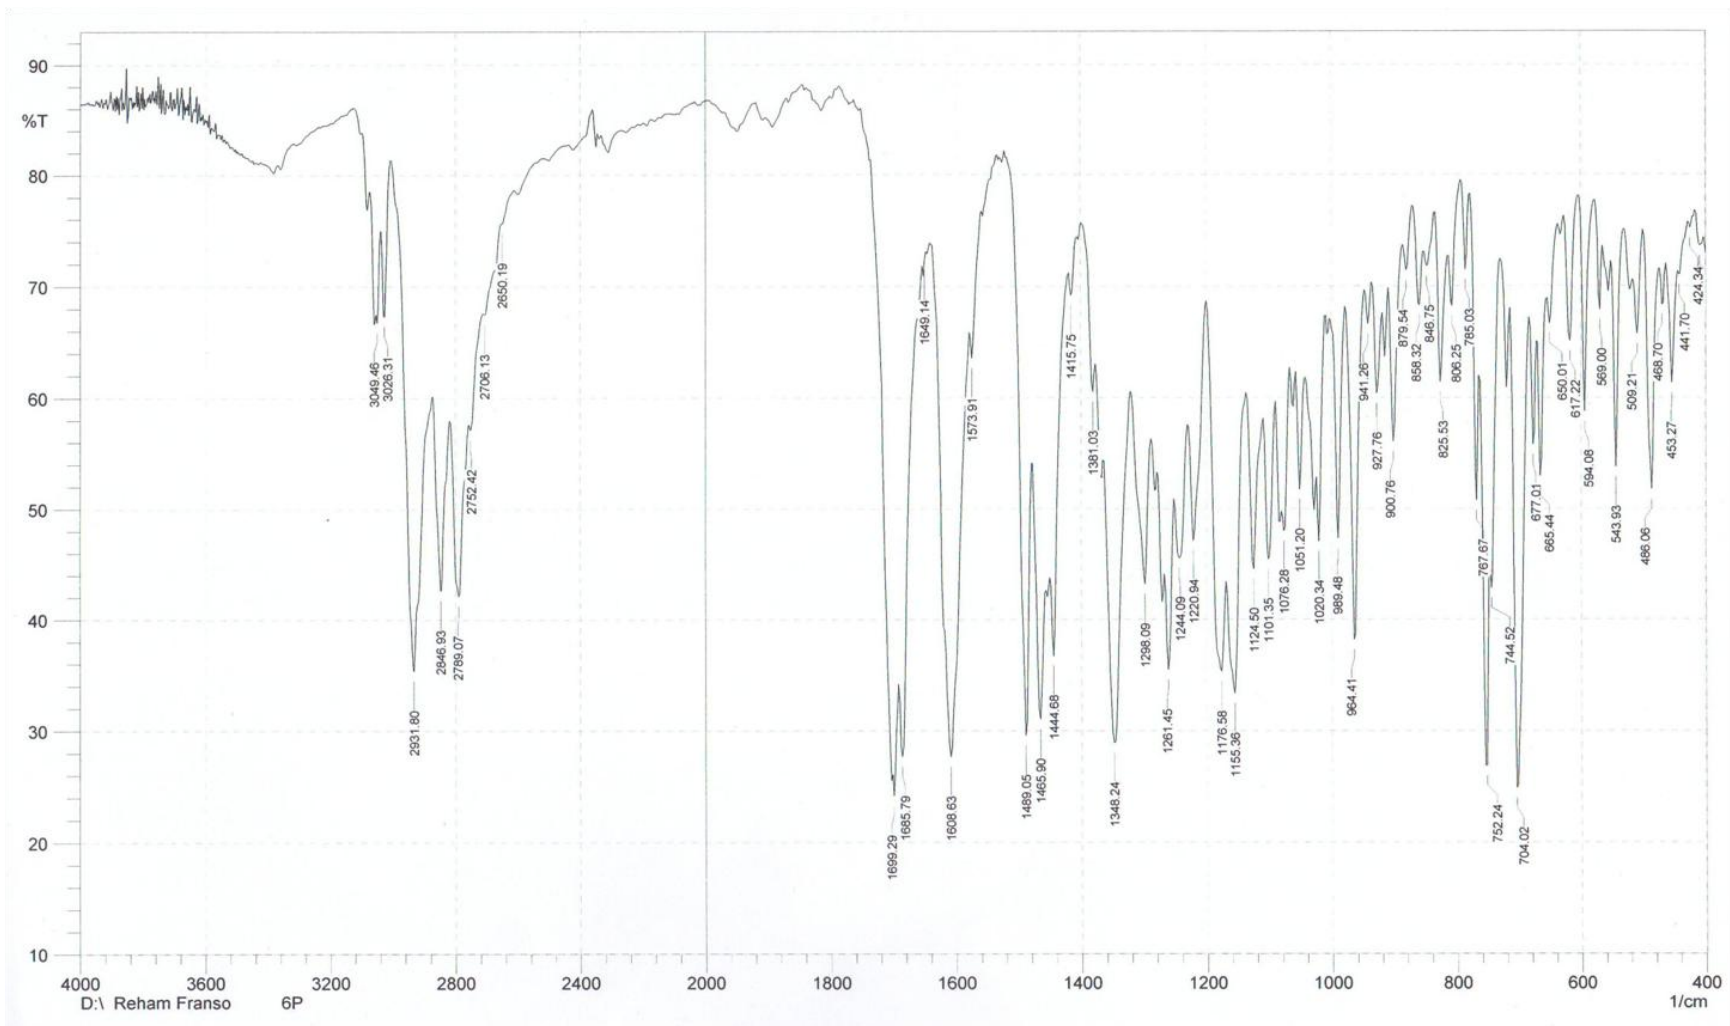

Figure S7. IR spectrum of compound **30** (KBr pellet).



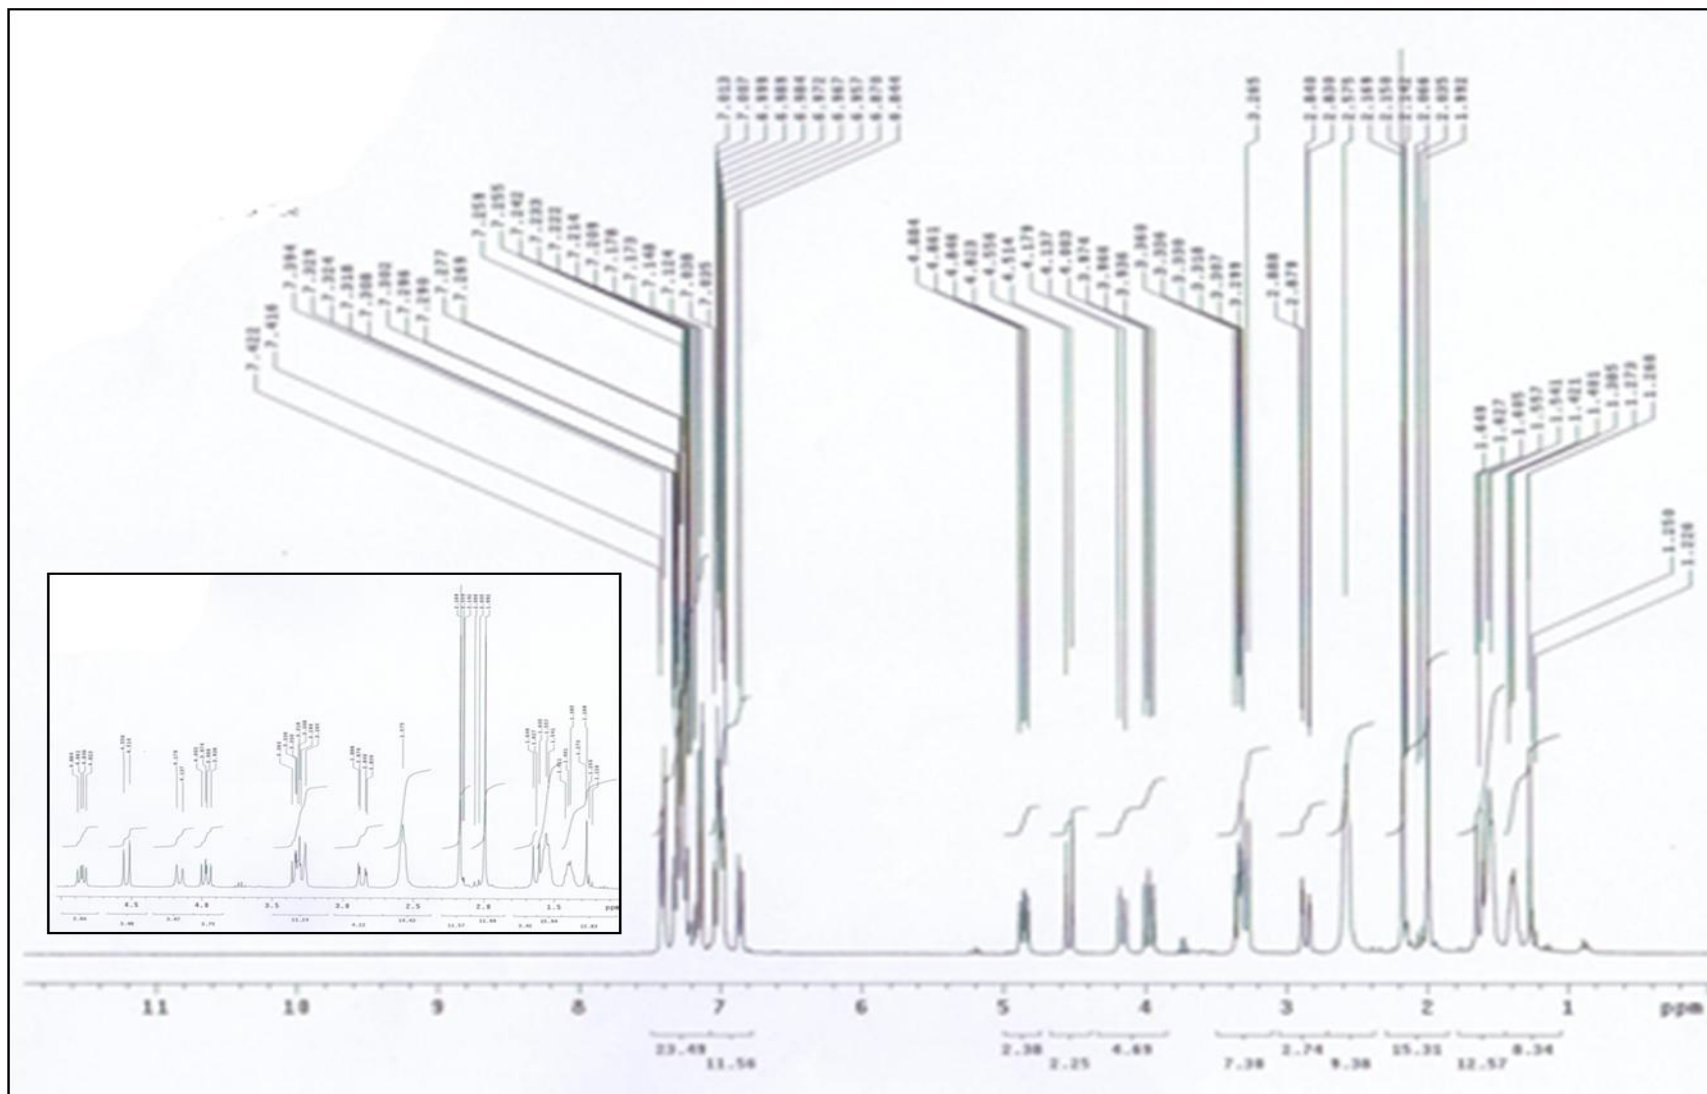

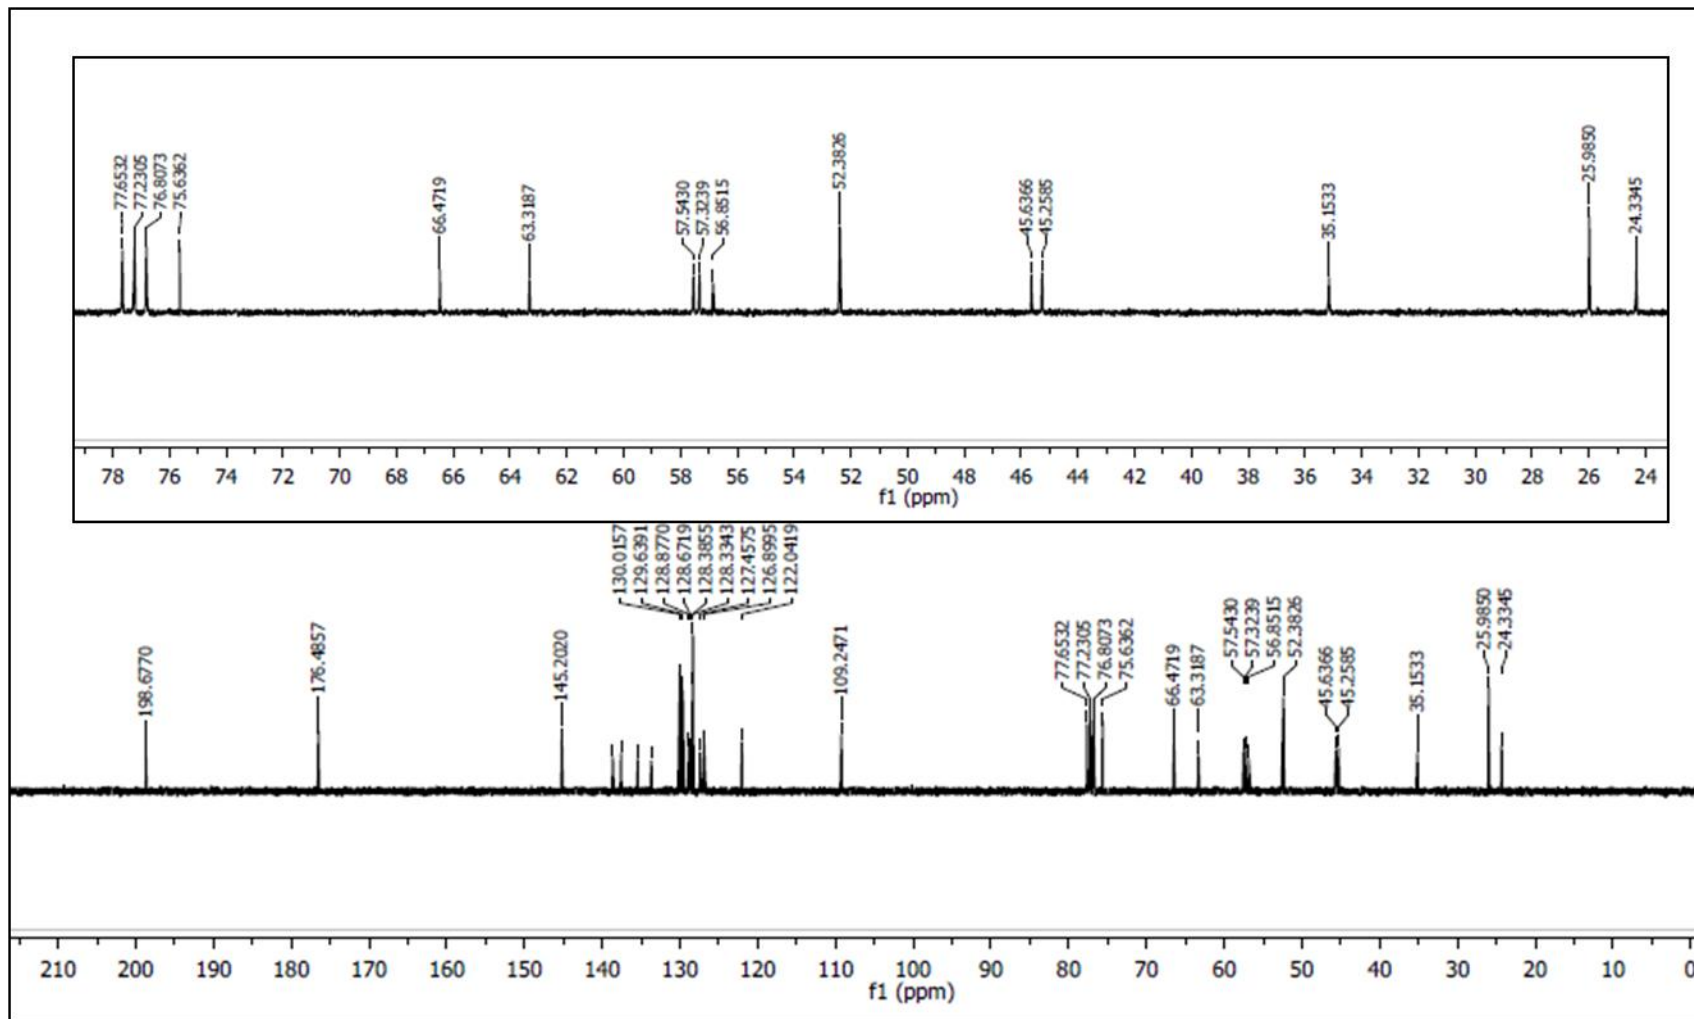

**Figure S9.**  $^{13}\text{C}$ -NMR spectrum of compound **30** in  $\text{CDCl}_3$ .

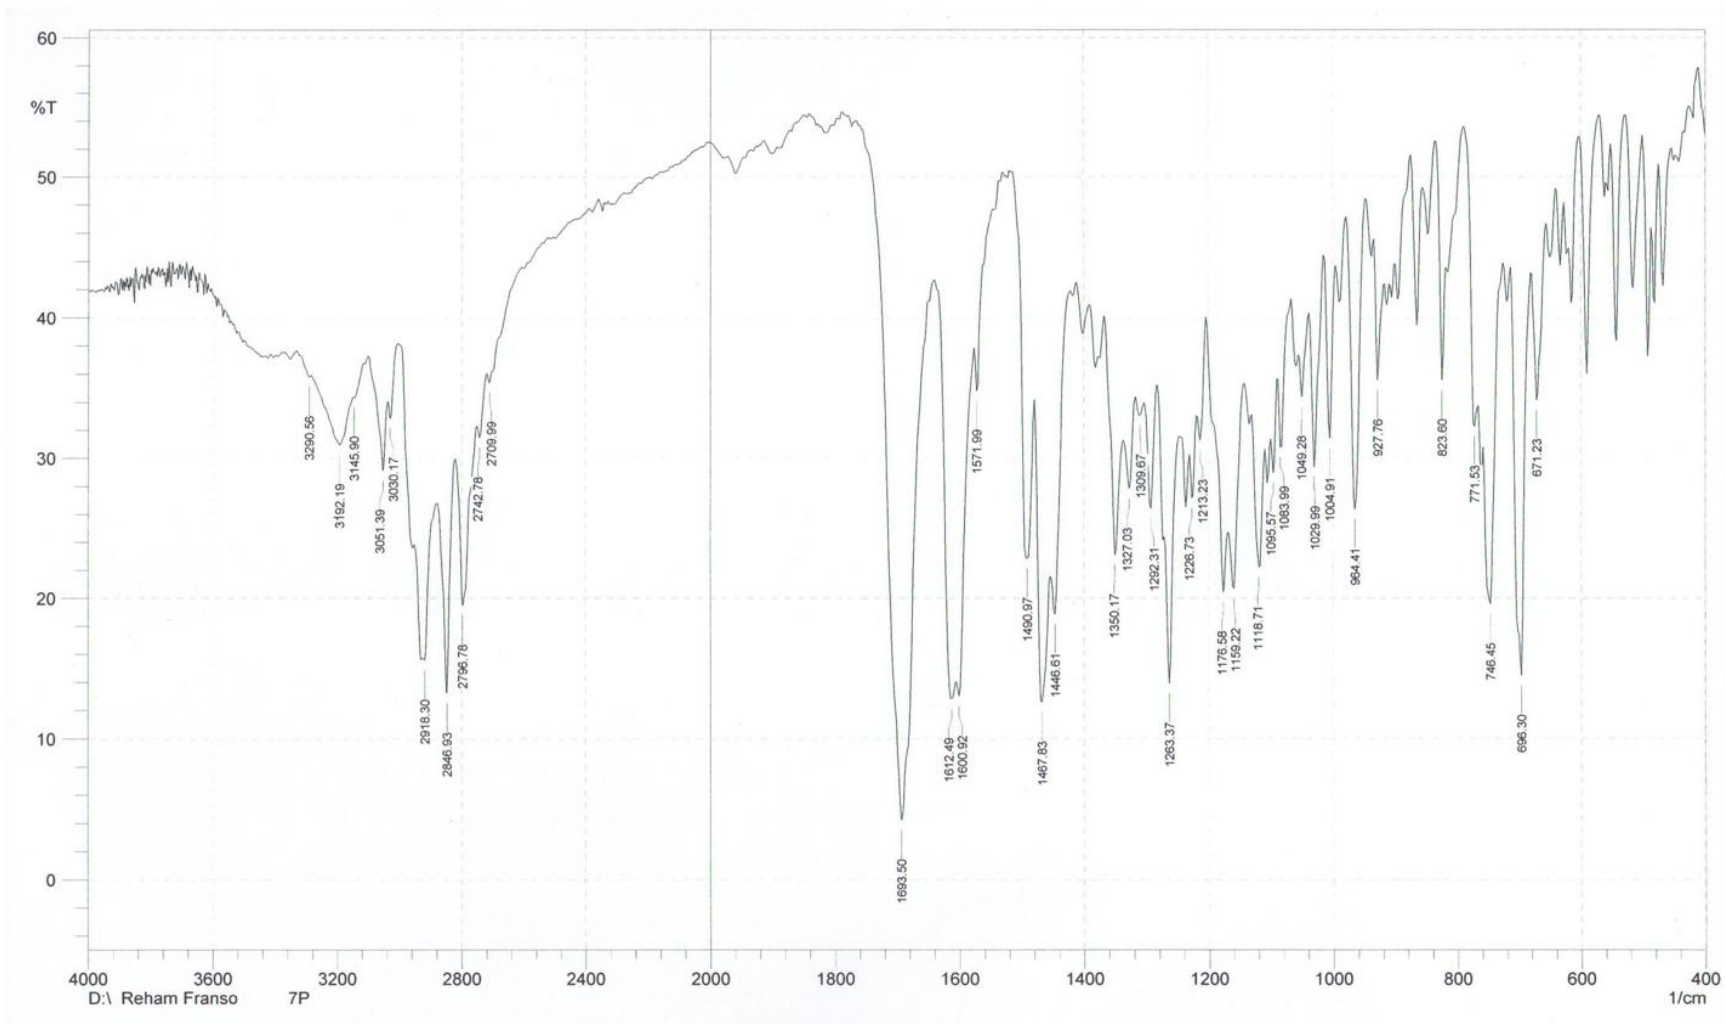

**Figure S10.** IR spectrum of compound **31** (KBr pellet).

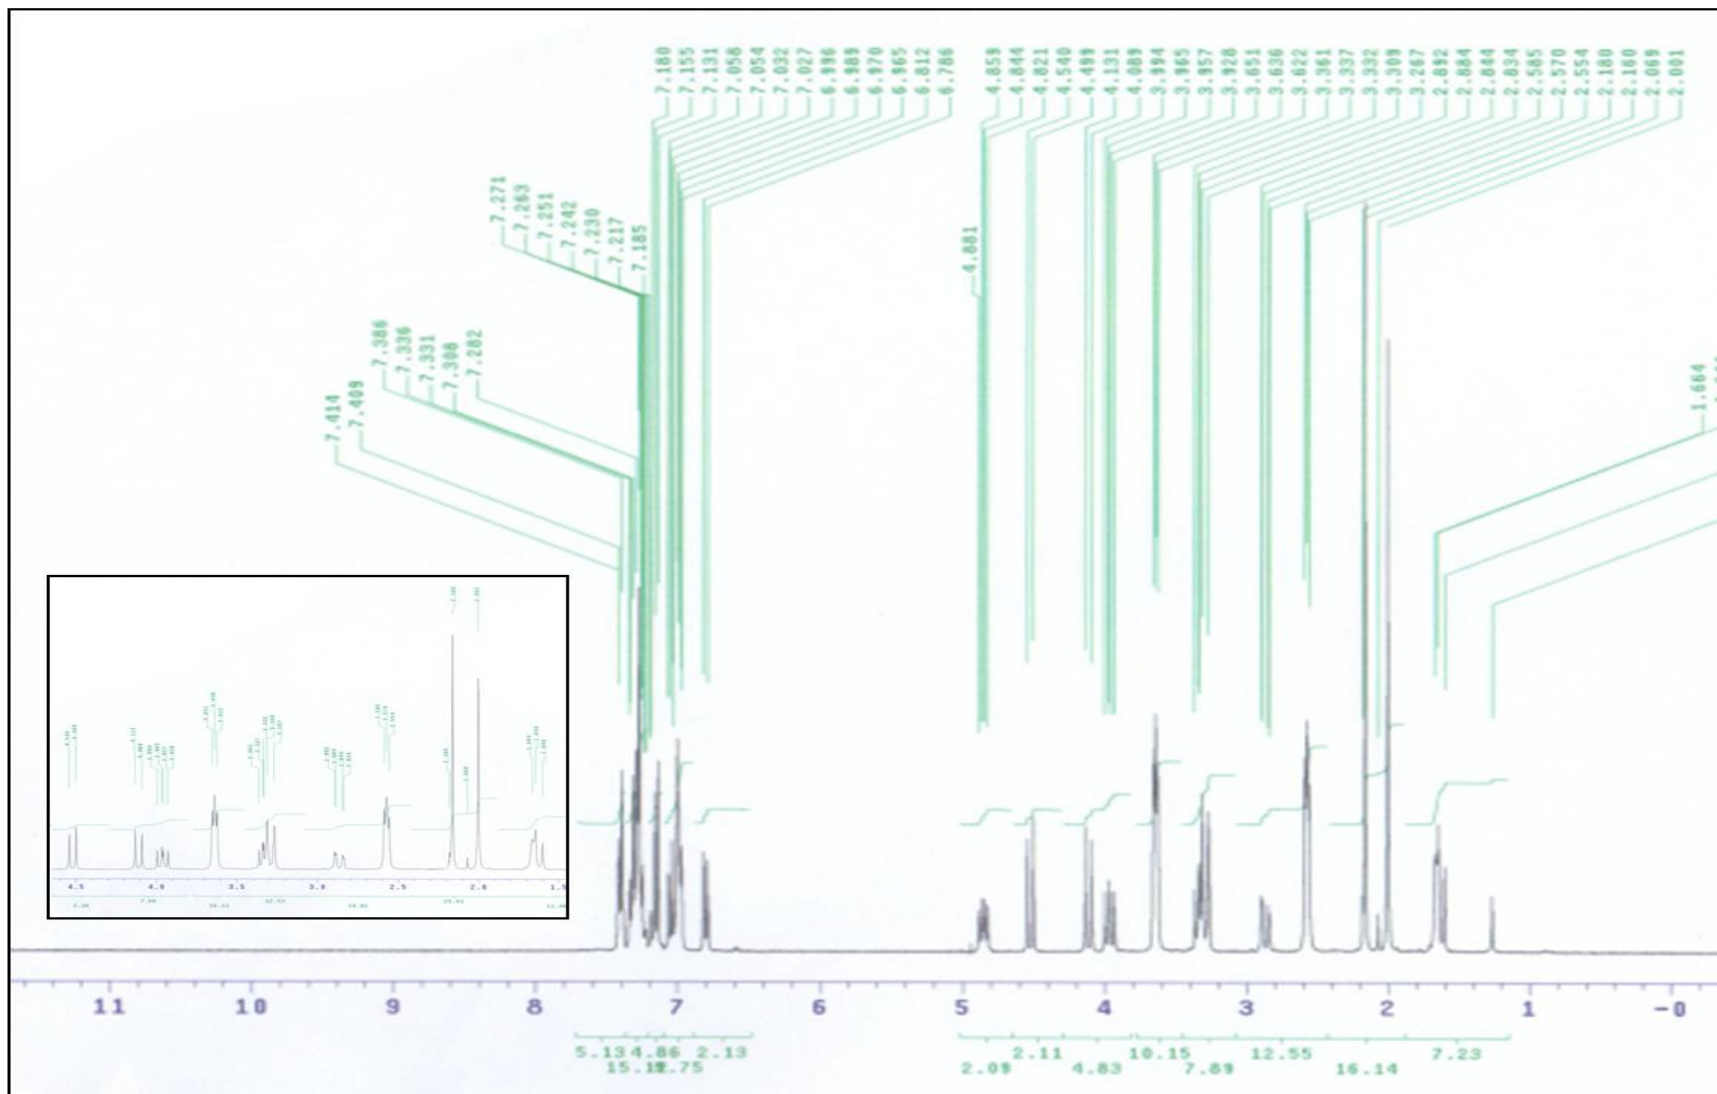

**Figure S11.**  $^1\text{H-NMR}$  spectrum of compound **31** in  $\text{CDCl}_3$ .

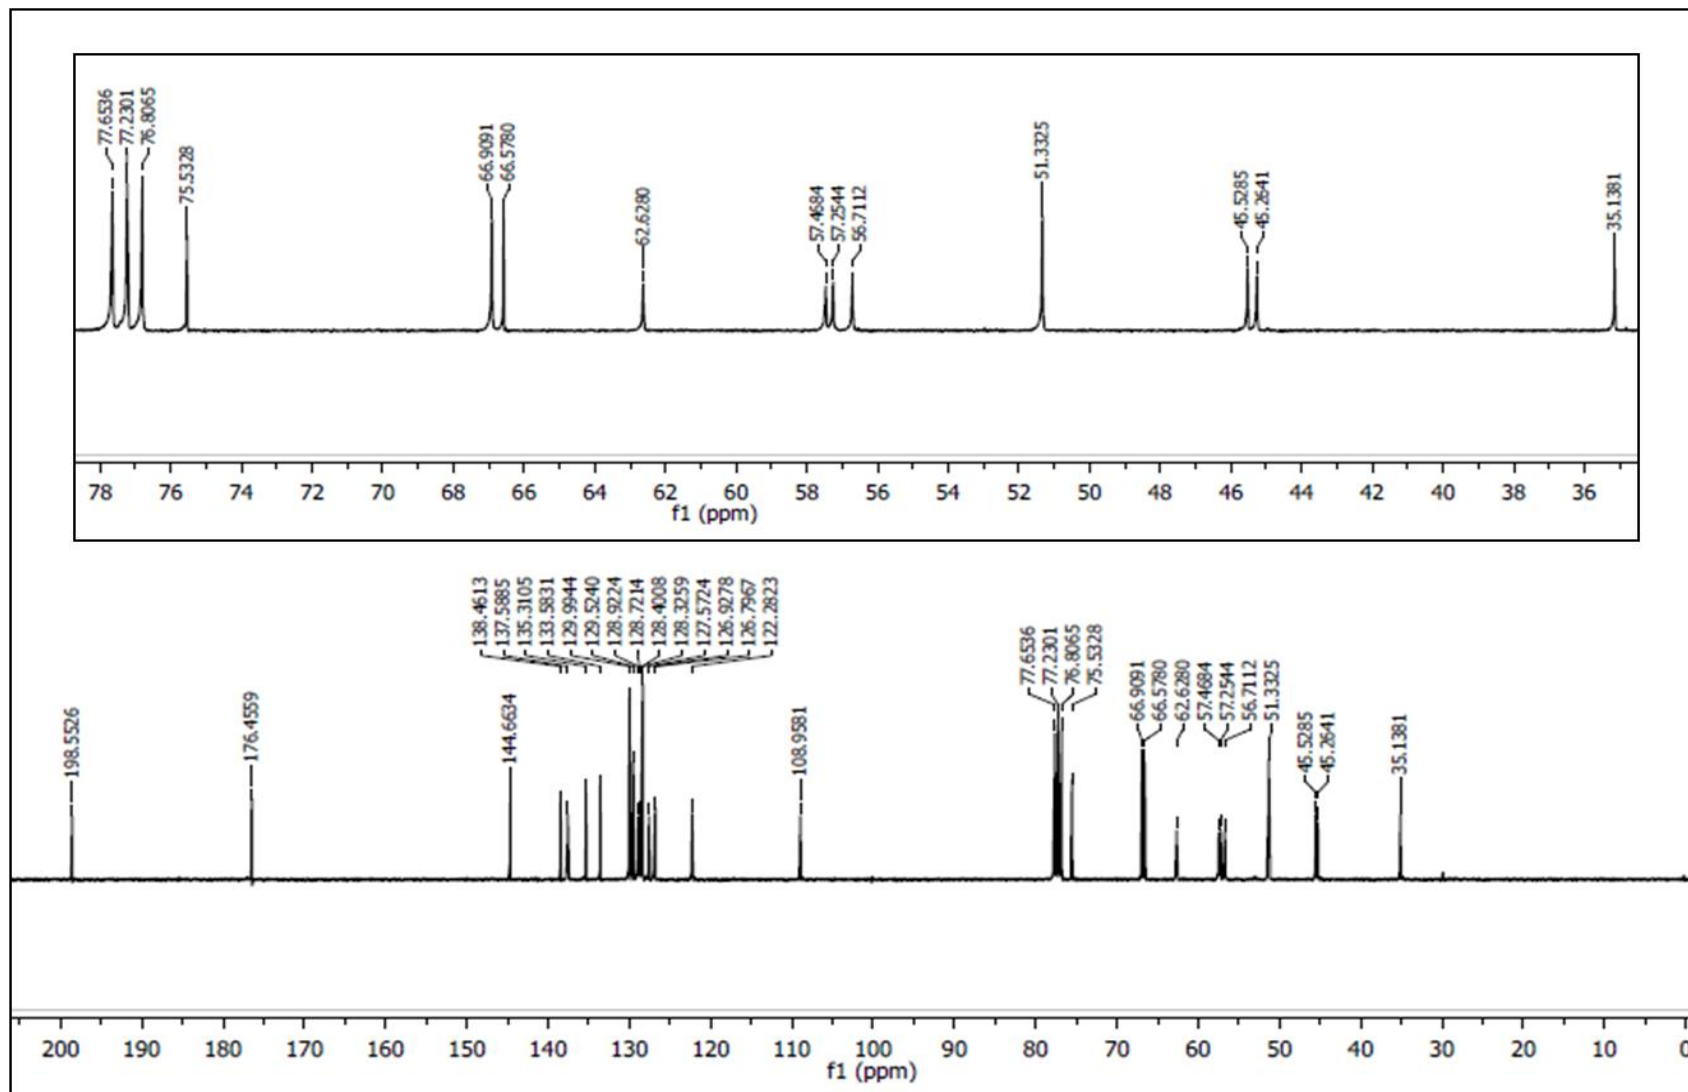

**Figure S12.**  $^{13}\text{C}$ -NMR spectrum of compound 31 in  $\text{CDCl}_3$ .

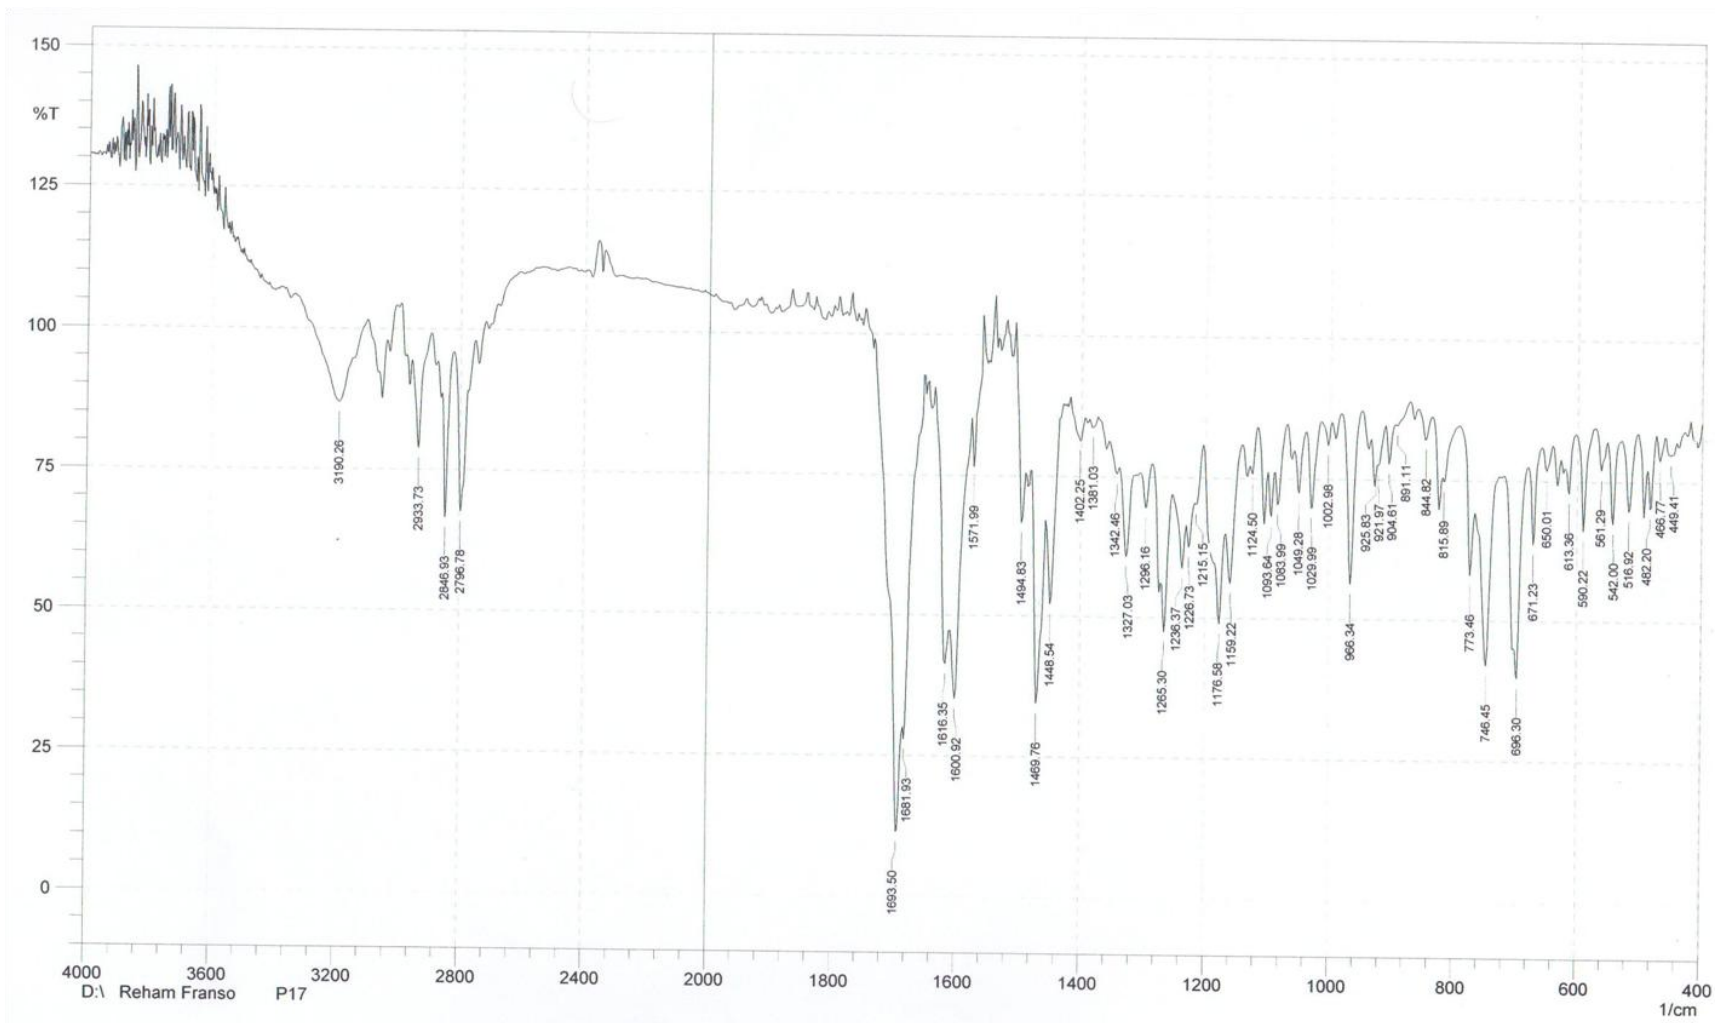

**Figure S13.** IR spectrum of compound **32** (KBr pellet).

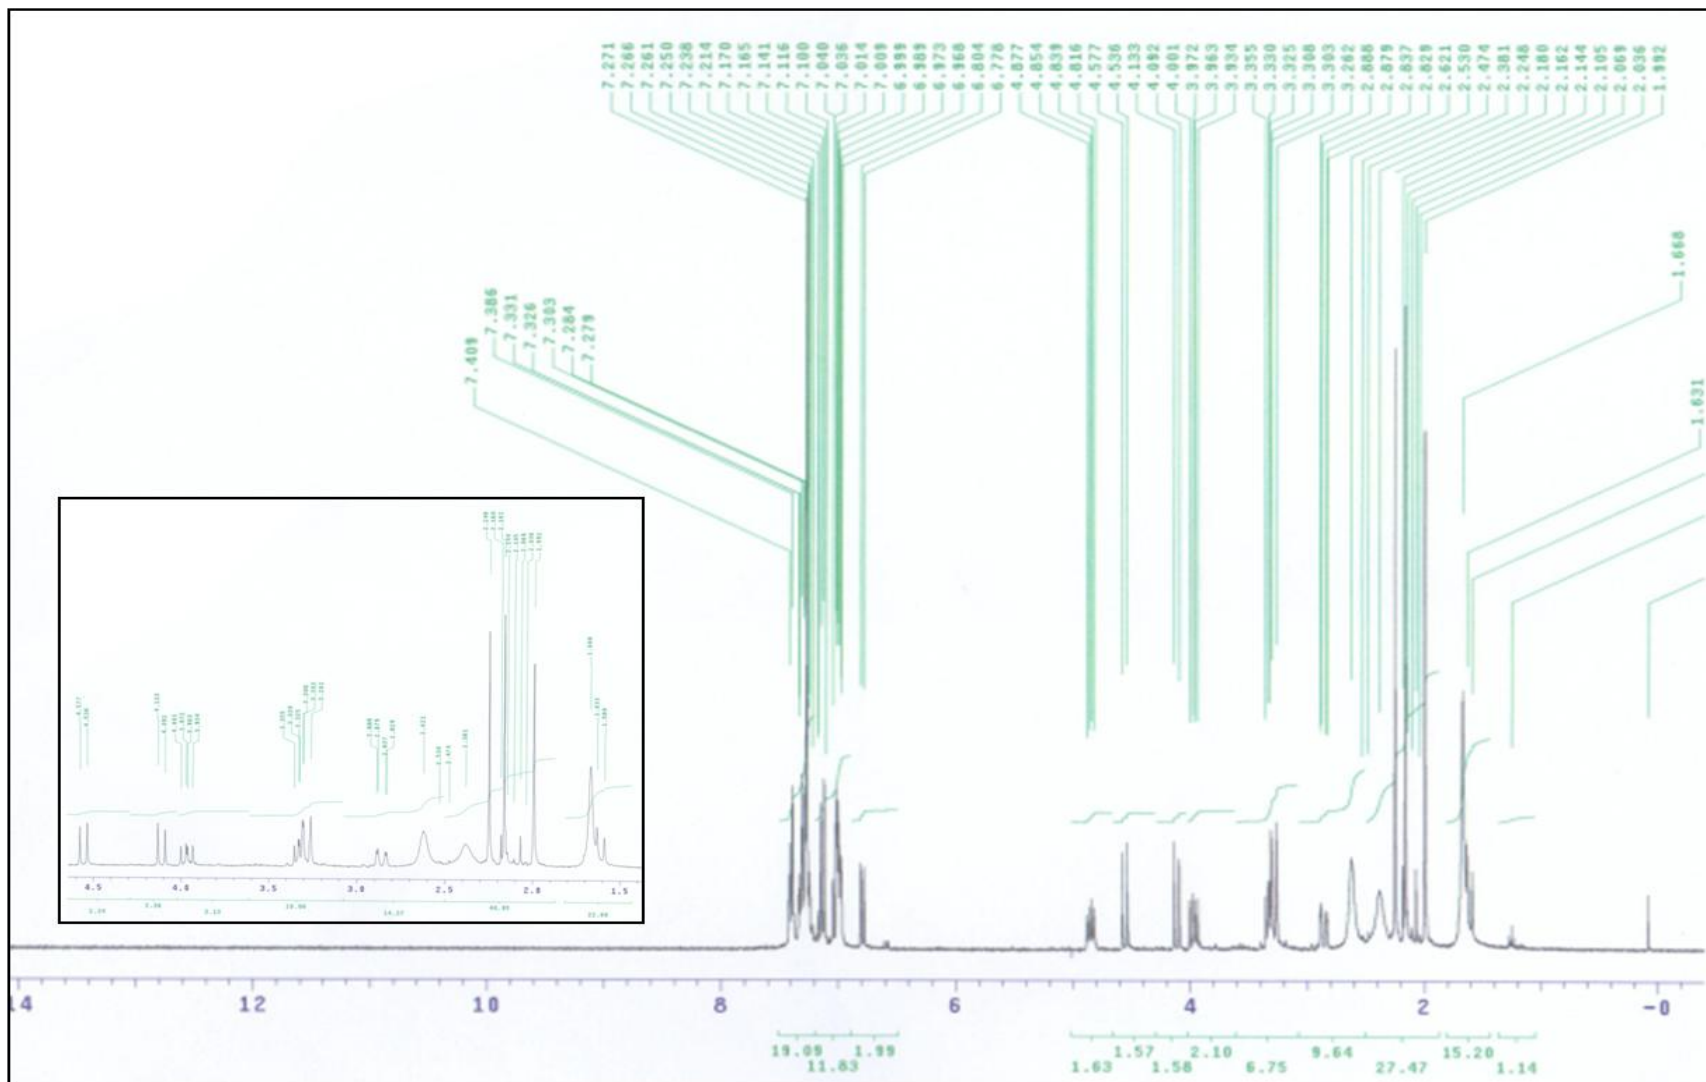

**Figure S14.**  $^1\text{H-NMR}$  spectrum of compound **32** in  $\text{CDCl}_3$ .

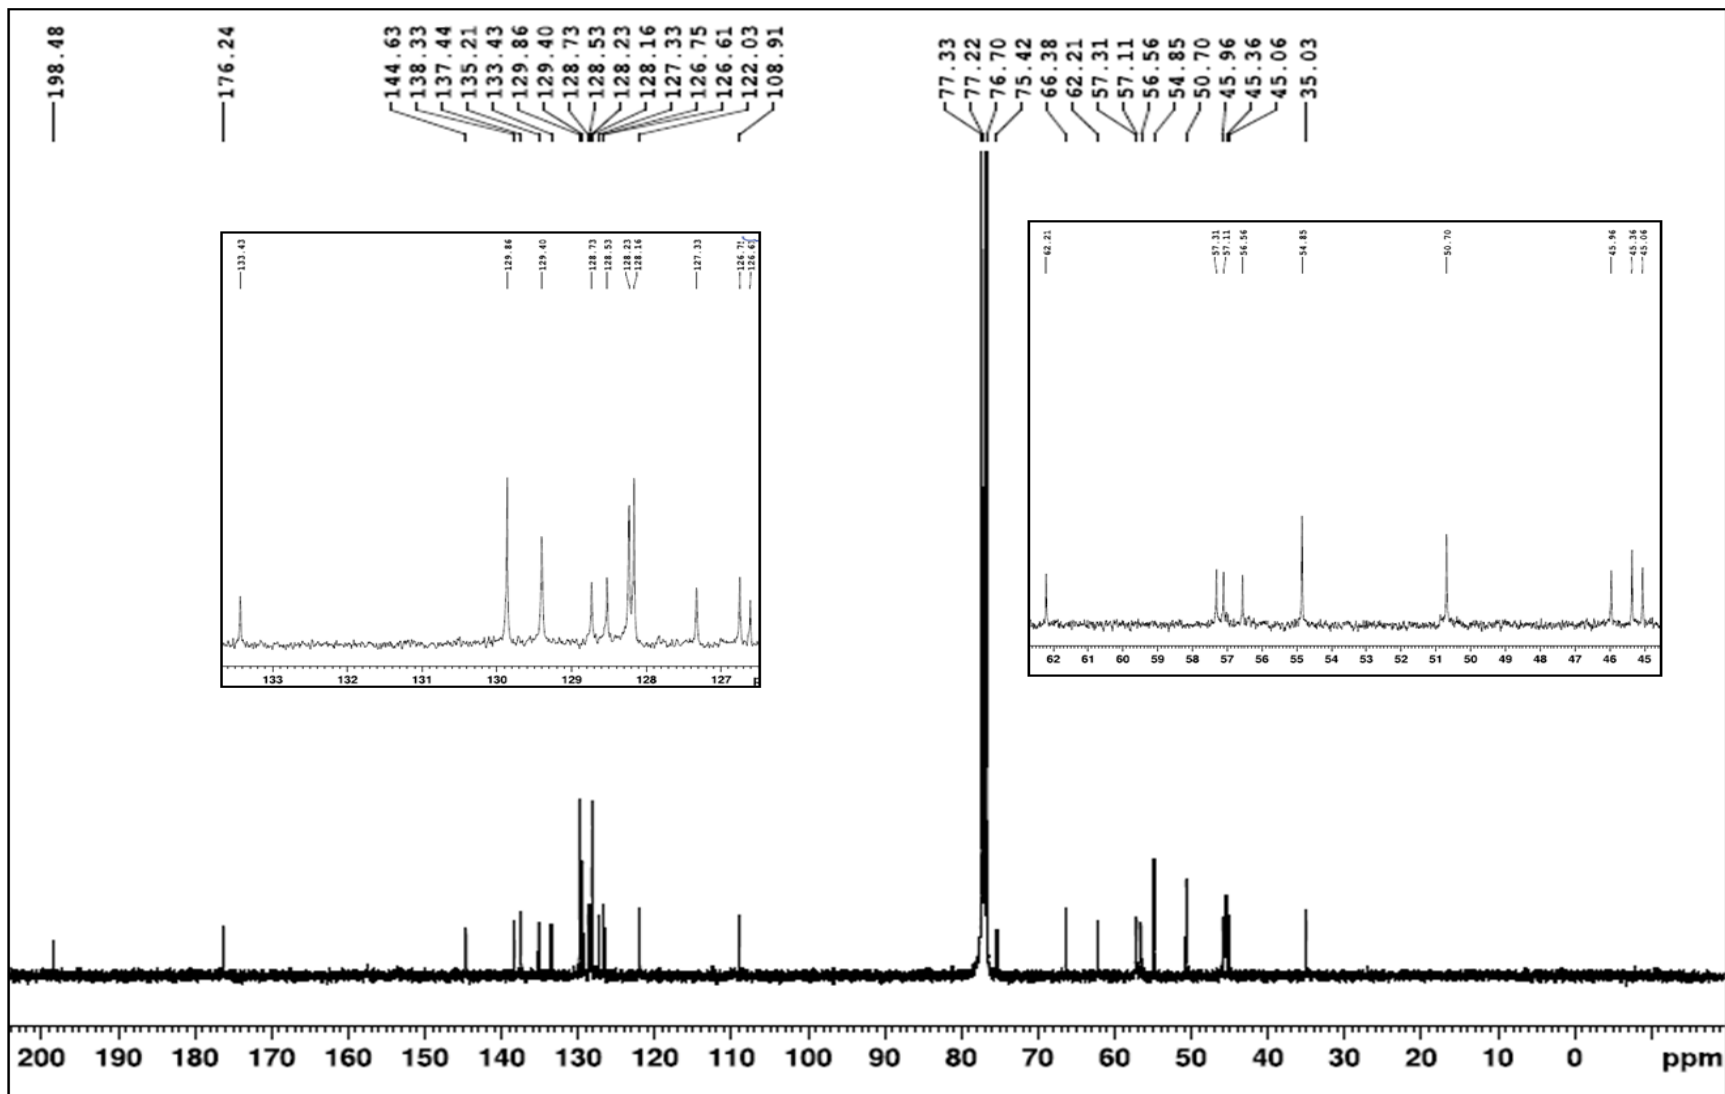

Figure S15.  $^{13}\text{C}$ -NMR spectrum of compound 32 in  $\text{CDCl}_3$ .



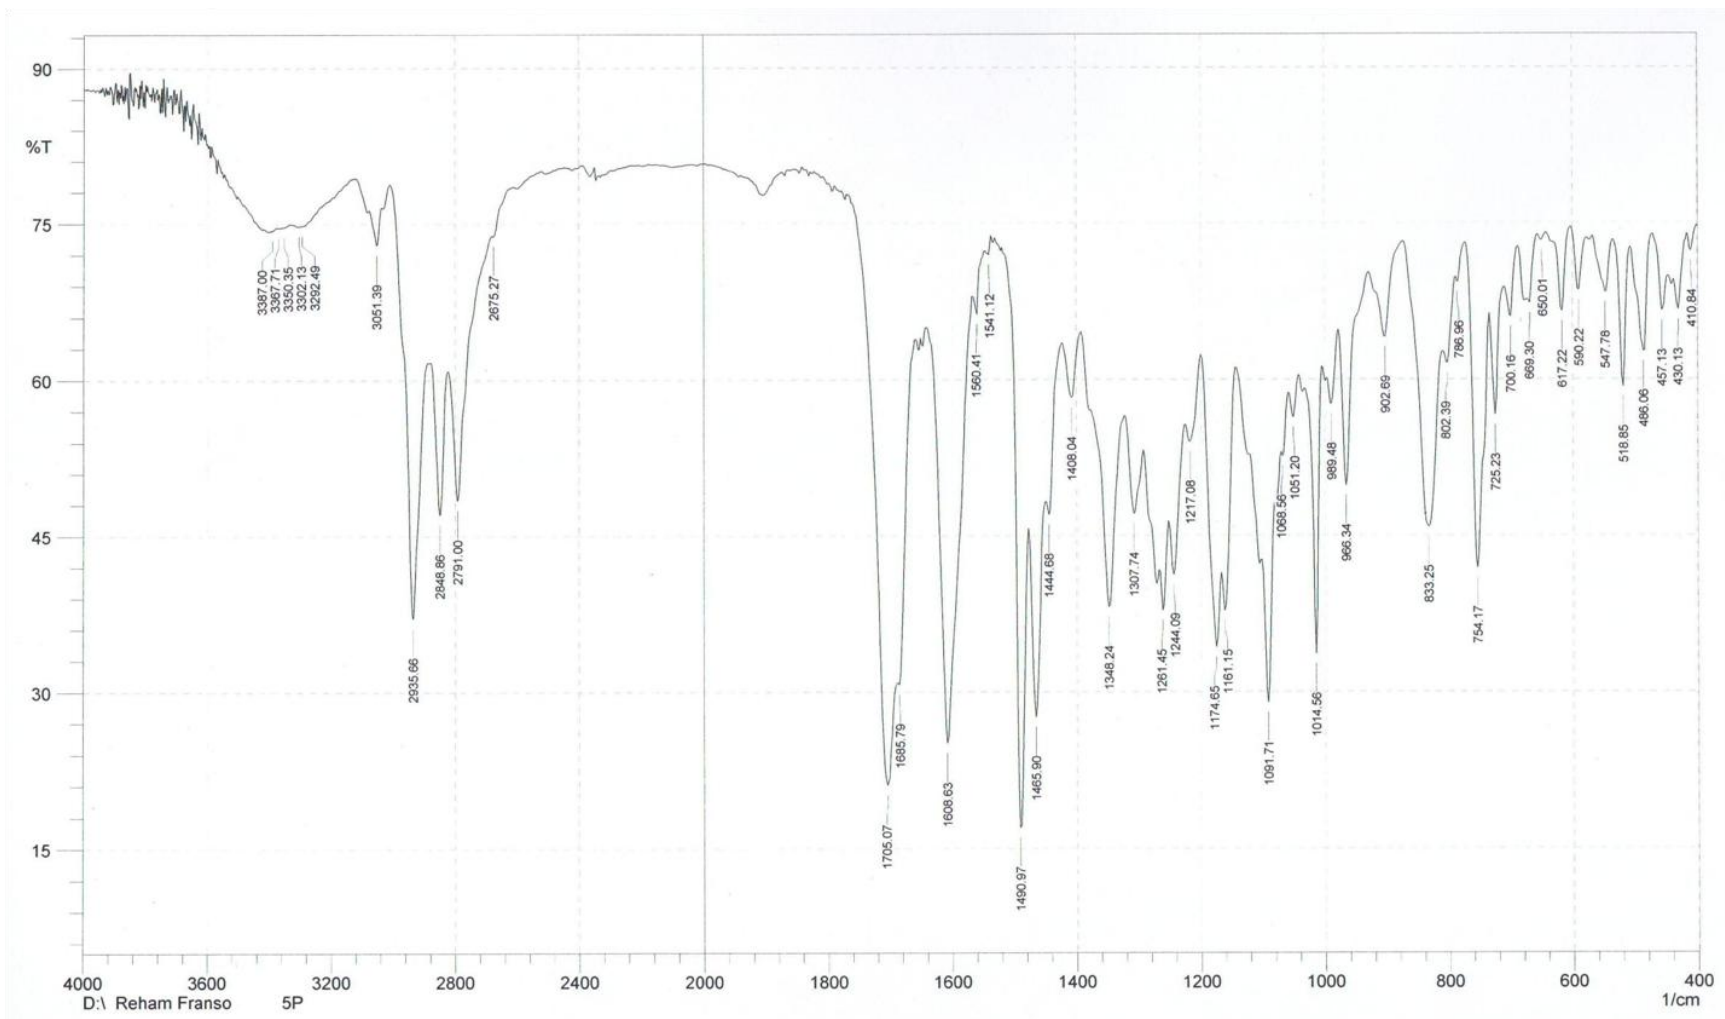

**Figure S16.** IR spectrum of compound **33** (KBr pellet).

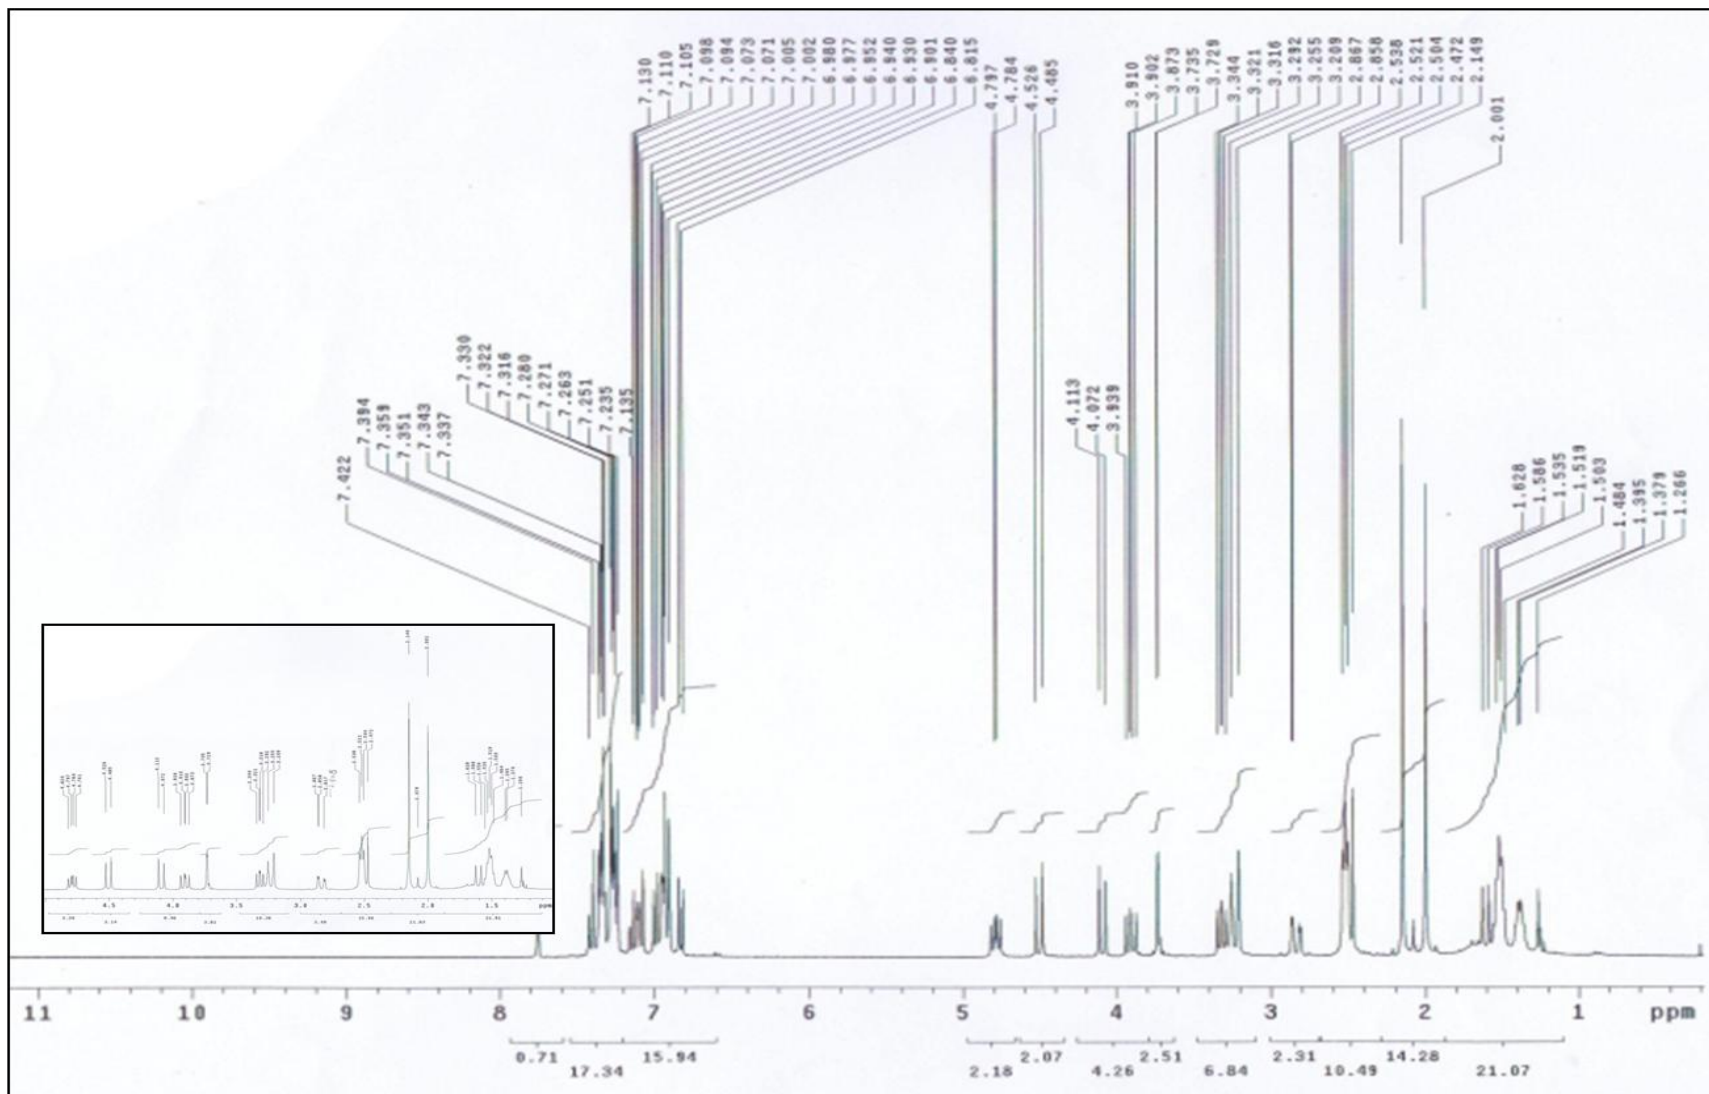

**Figure S17.**  $^1\text{H-NMR}$  spectrum of compound **33** in  $\text{CDCl}_3$ .

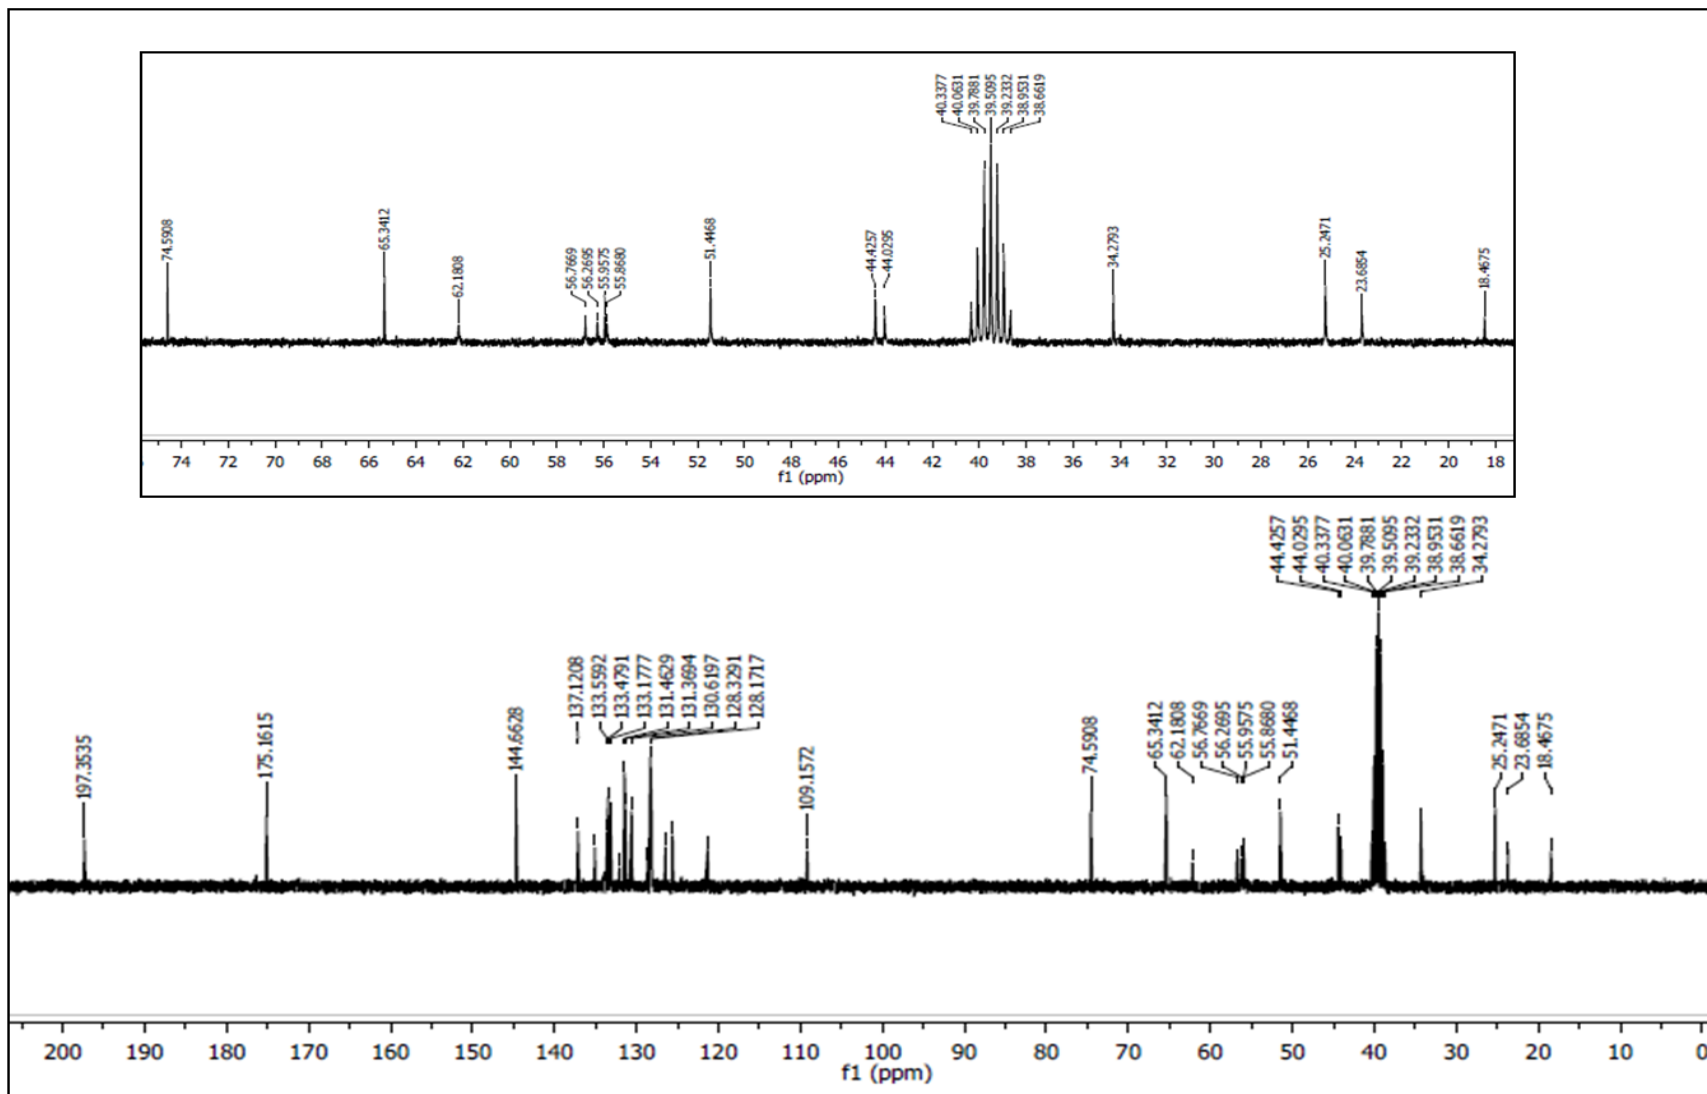

**Figure S18.**  $^{13}\text{C}$ -NMR spectrum of compound **33** in  $\text{DMSO-}d_6$ .

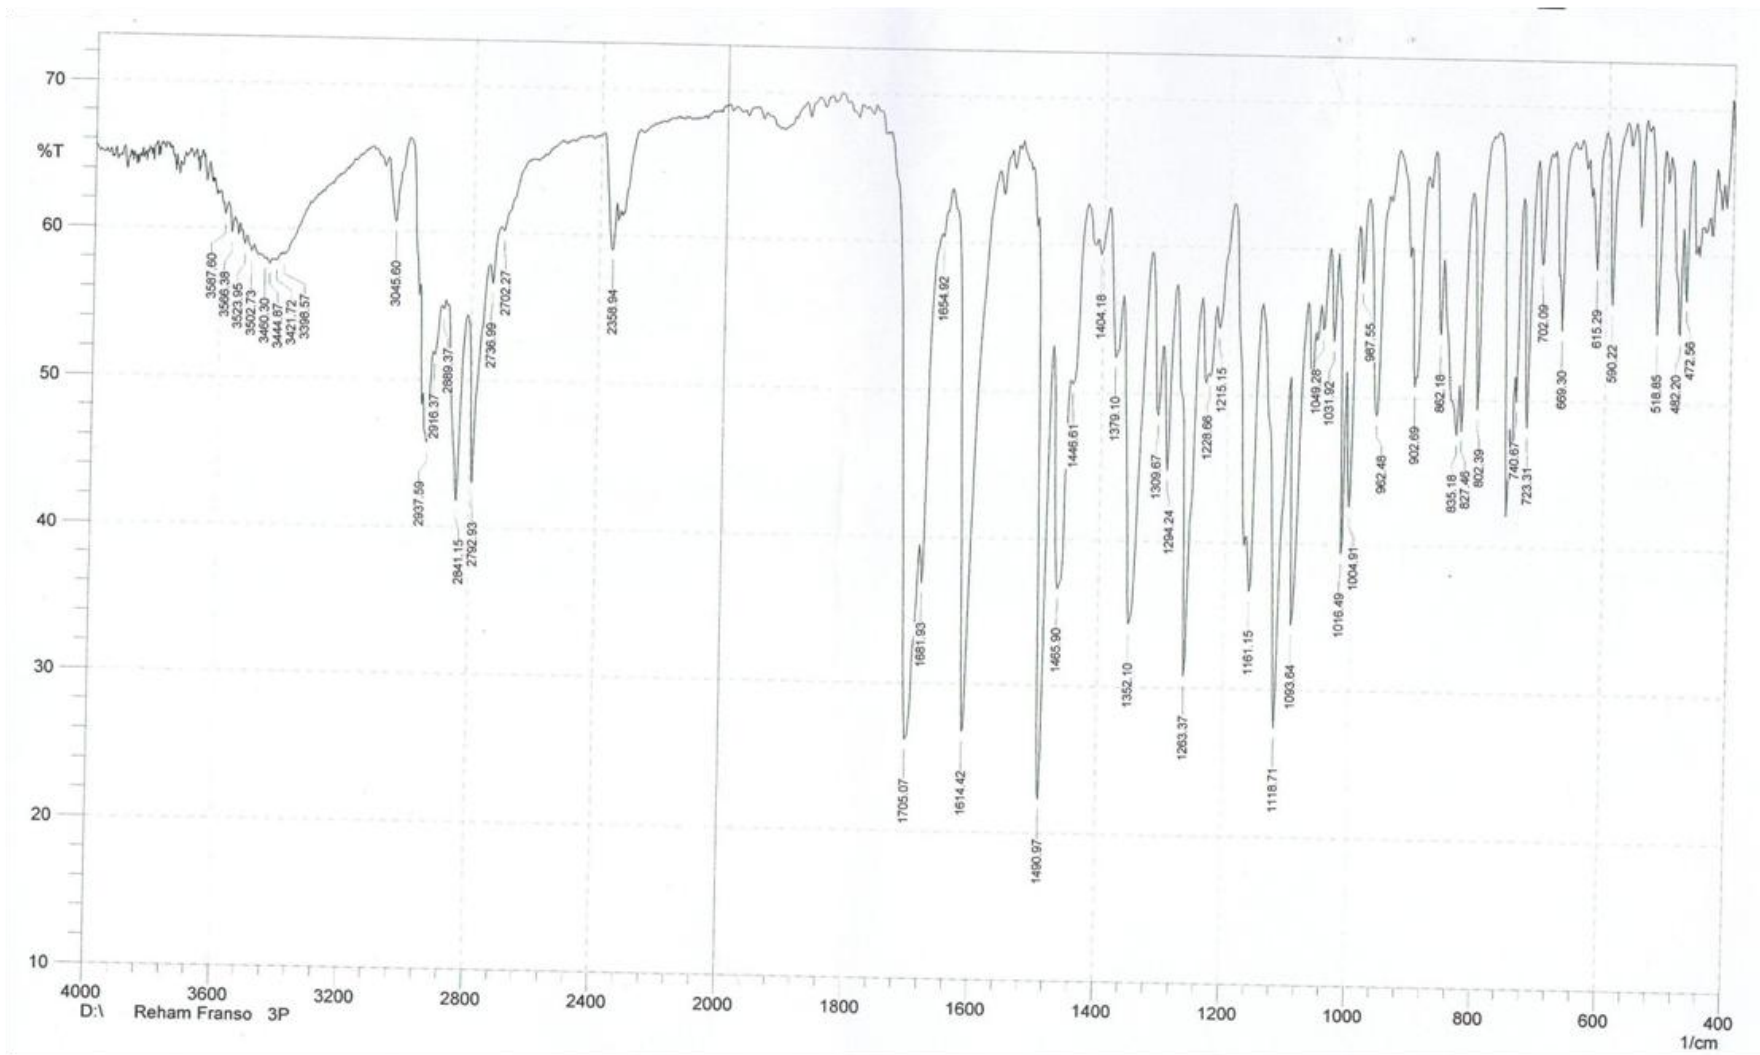

Figure S19. IR spectrum of compound 34 (KBr pellet).

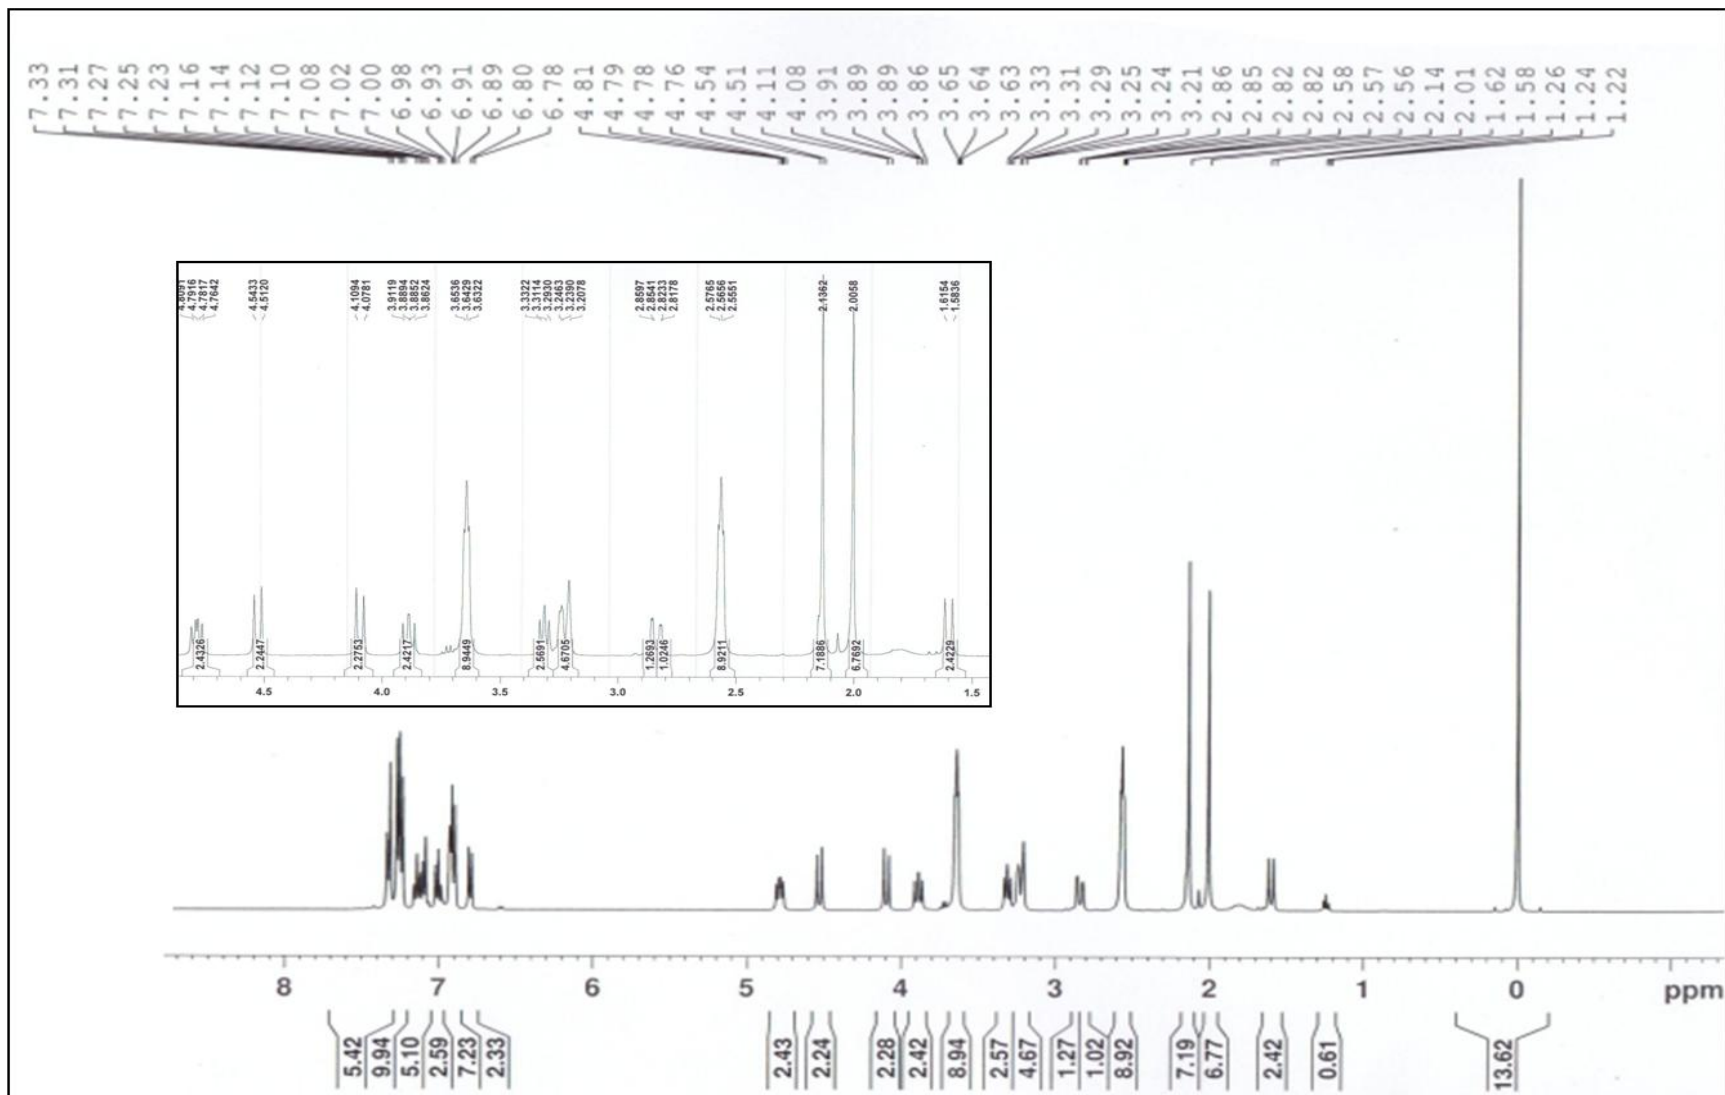

Figure S20. <sup>1</sup>H-NMR spectrum of compound 34 in CDCl<sub>3</sub>.

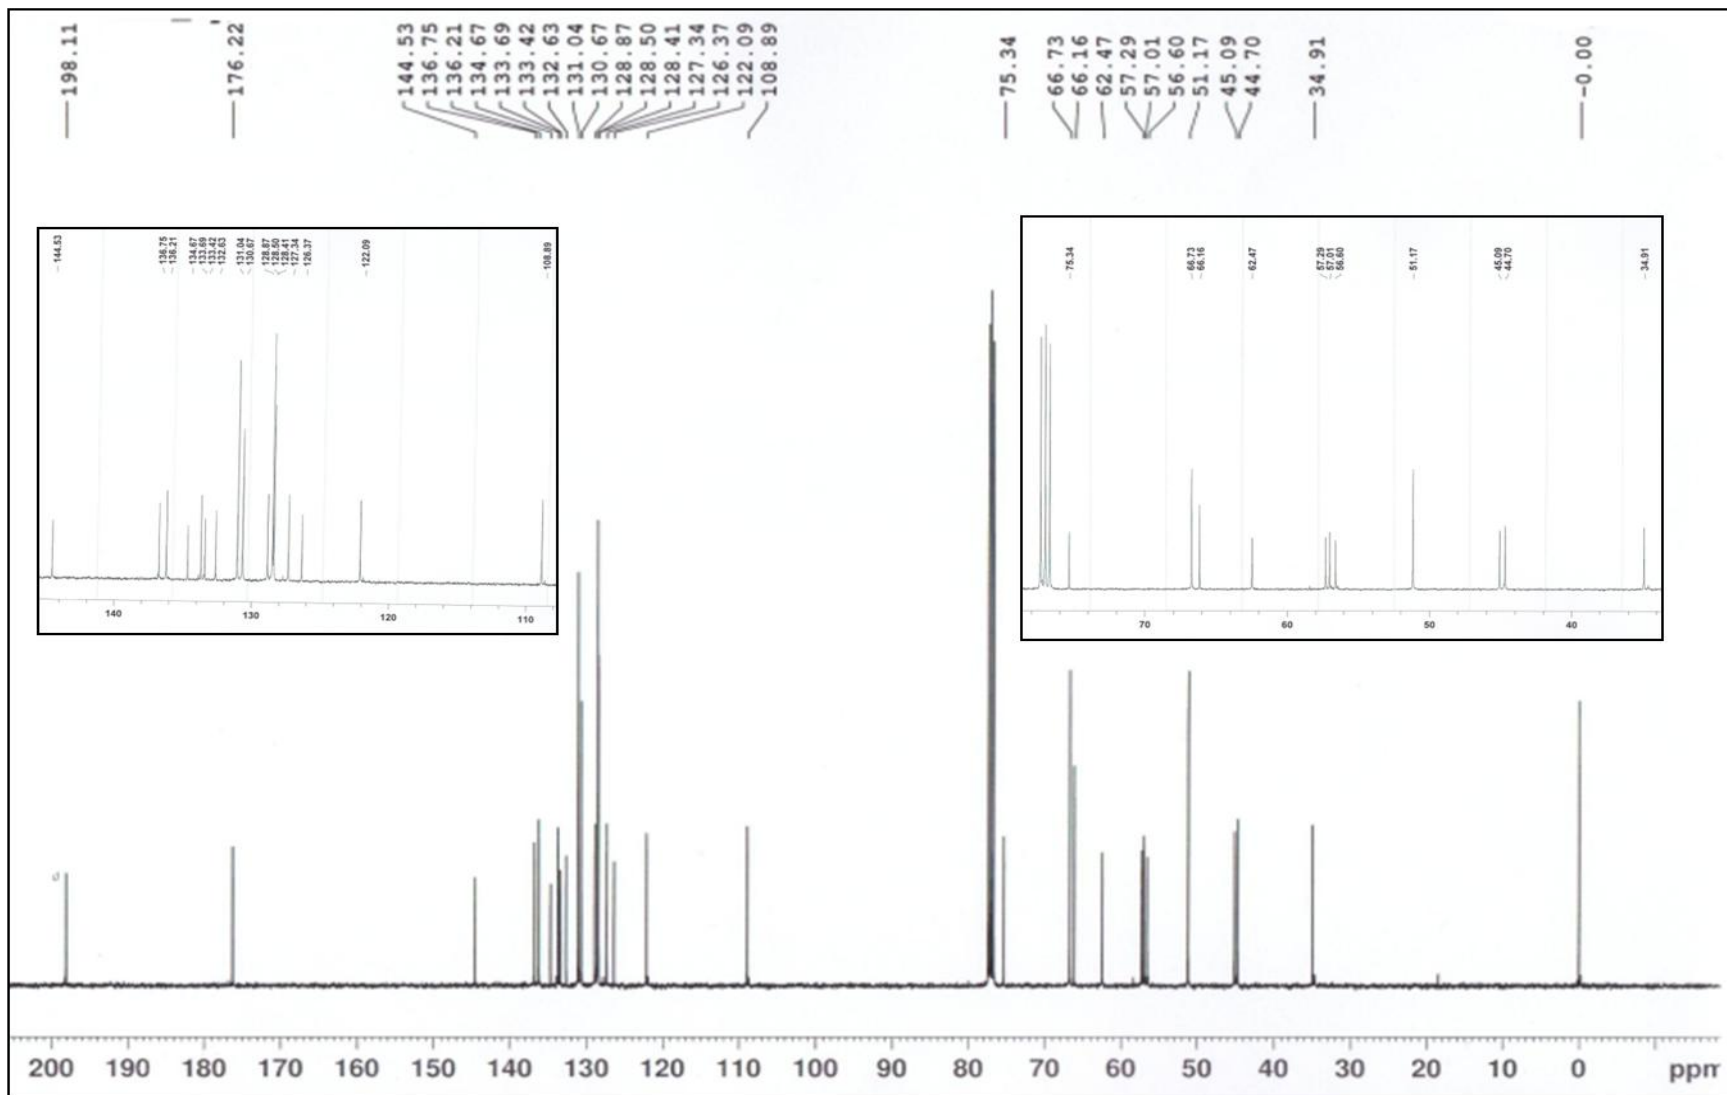

Figure S21.  $^{13}\text{C}$ -NMR spectrum of compound **34** in  $\text{CDCl}_3$ .

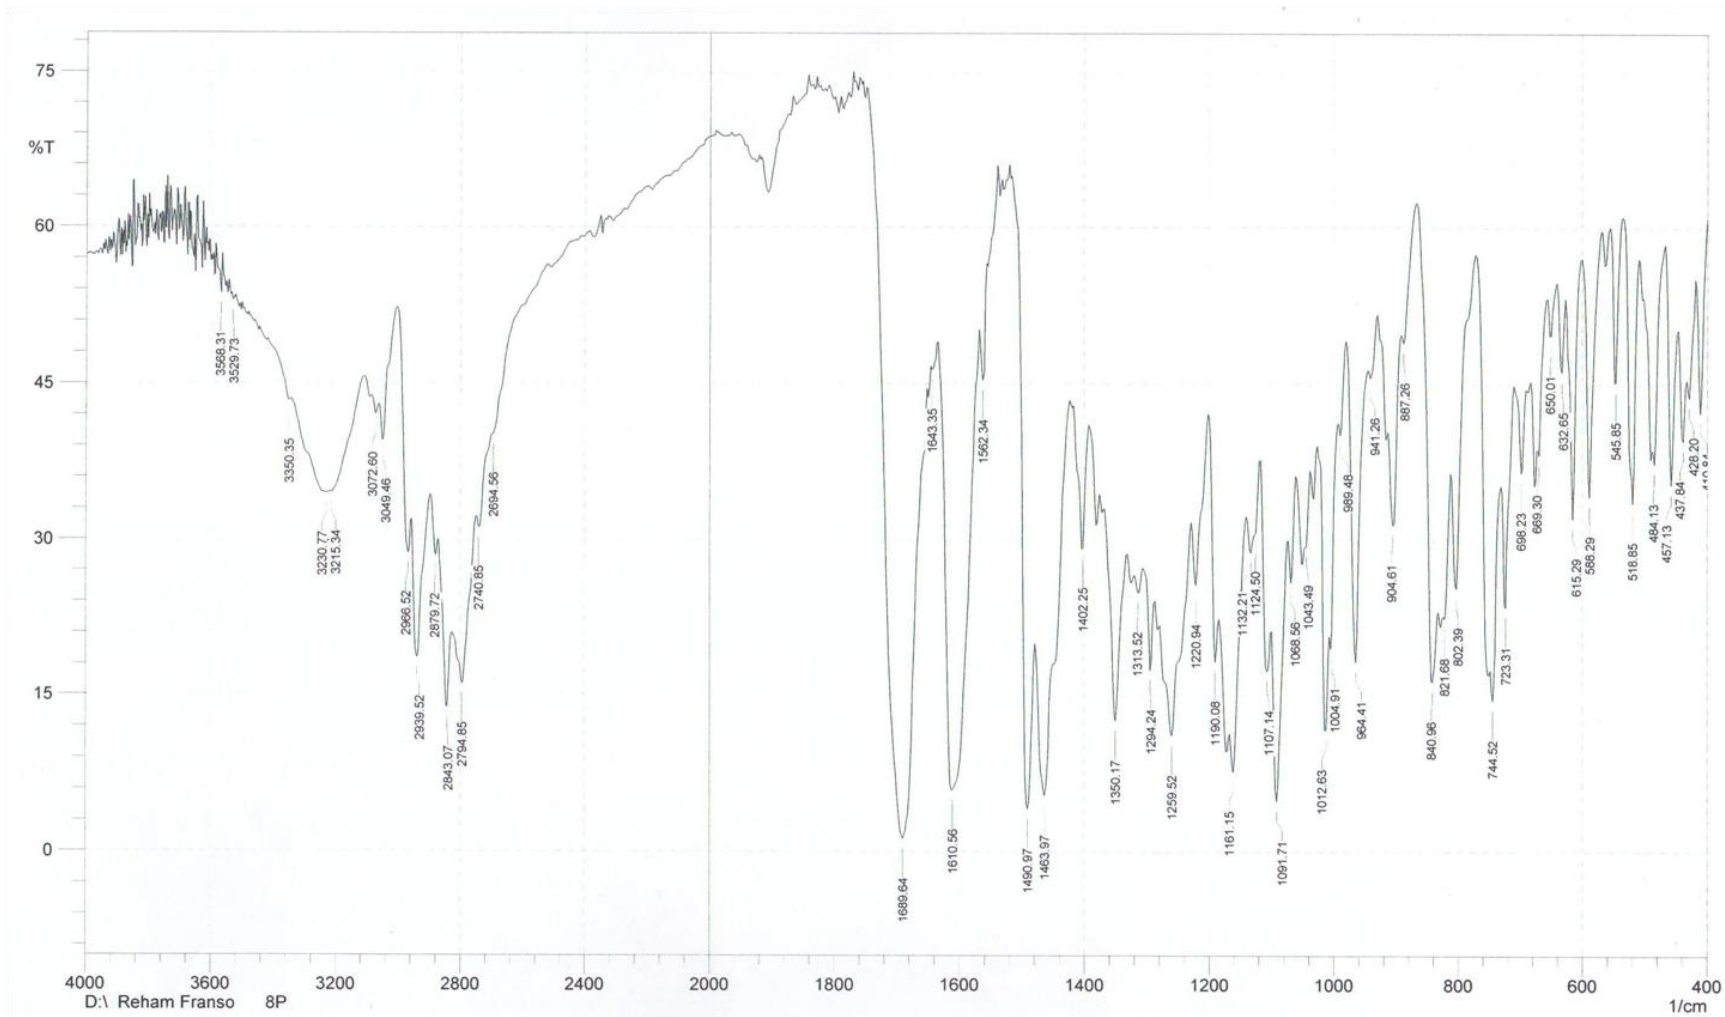

**Figure S22.** IR spectrum of compound **35** (KBr pellet).

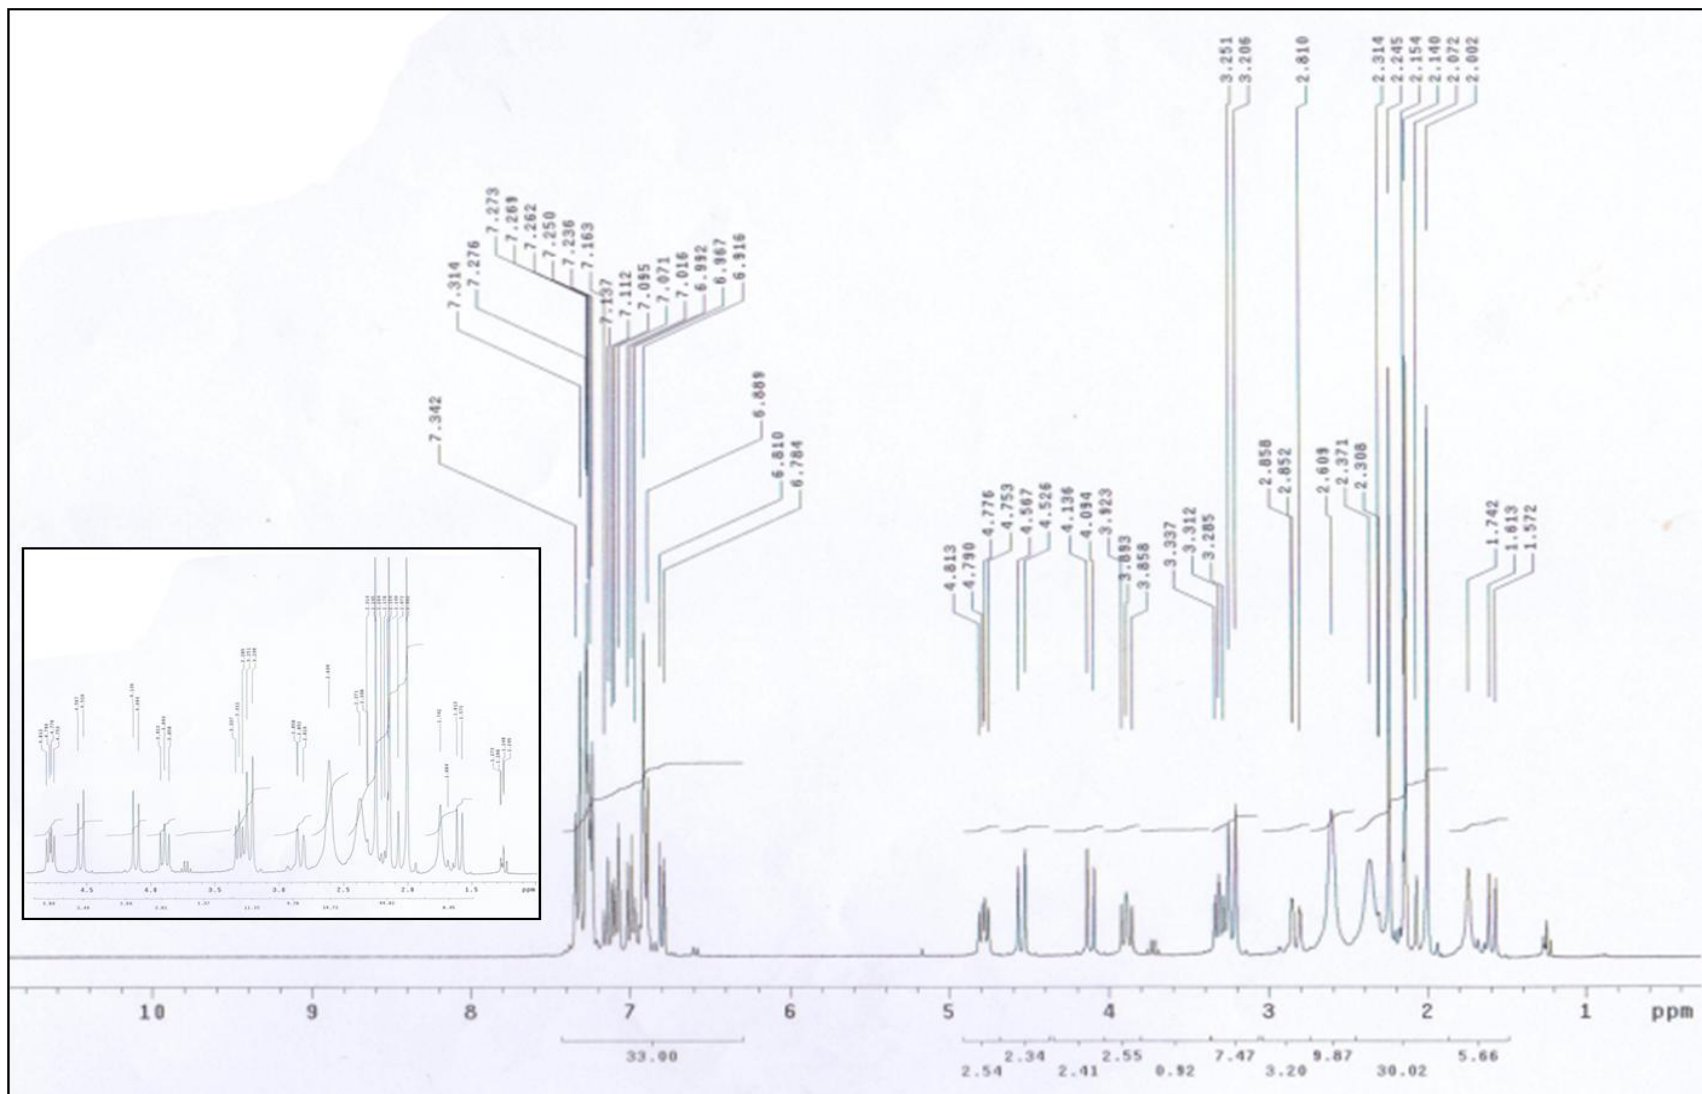

**Figure S23.**  $^1\text{H-NMR}$  spectrum of compound **35** in  $\text{CDCl}_3$ .



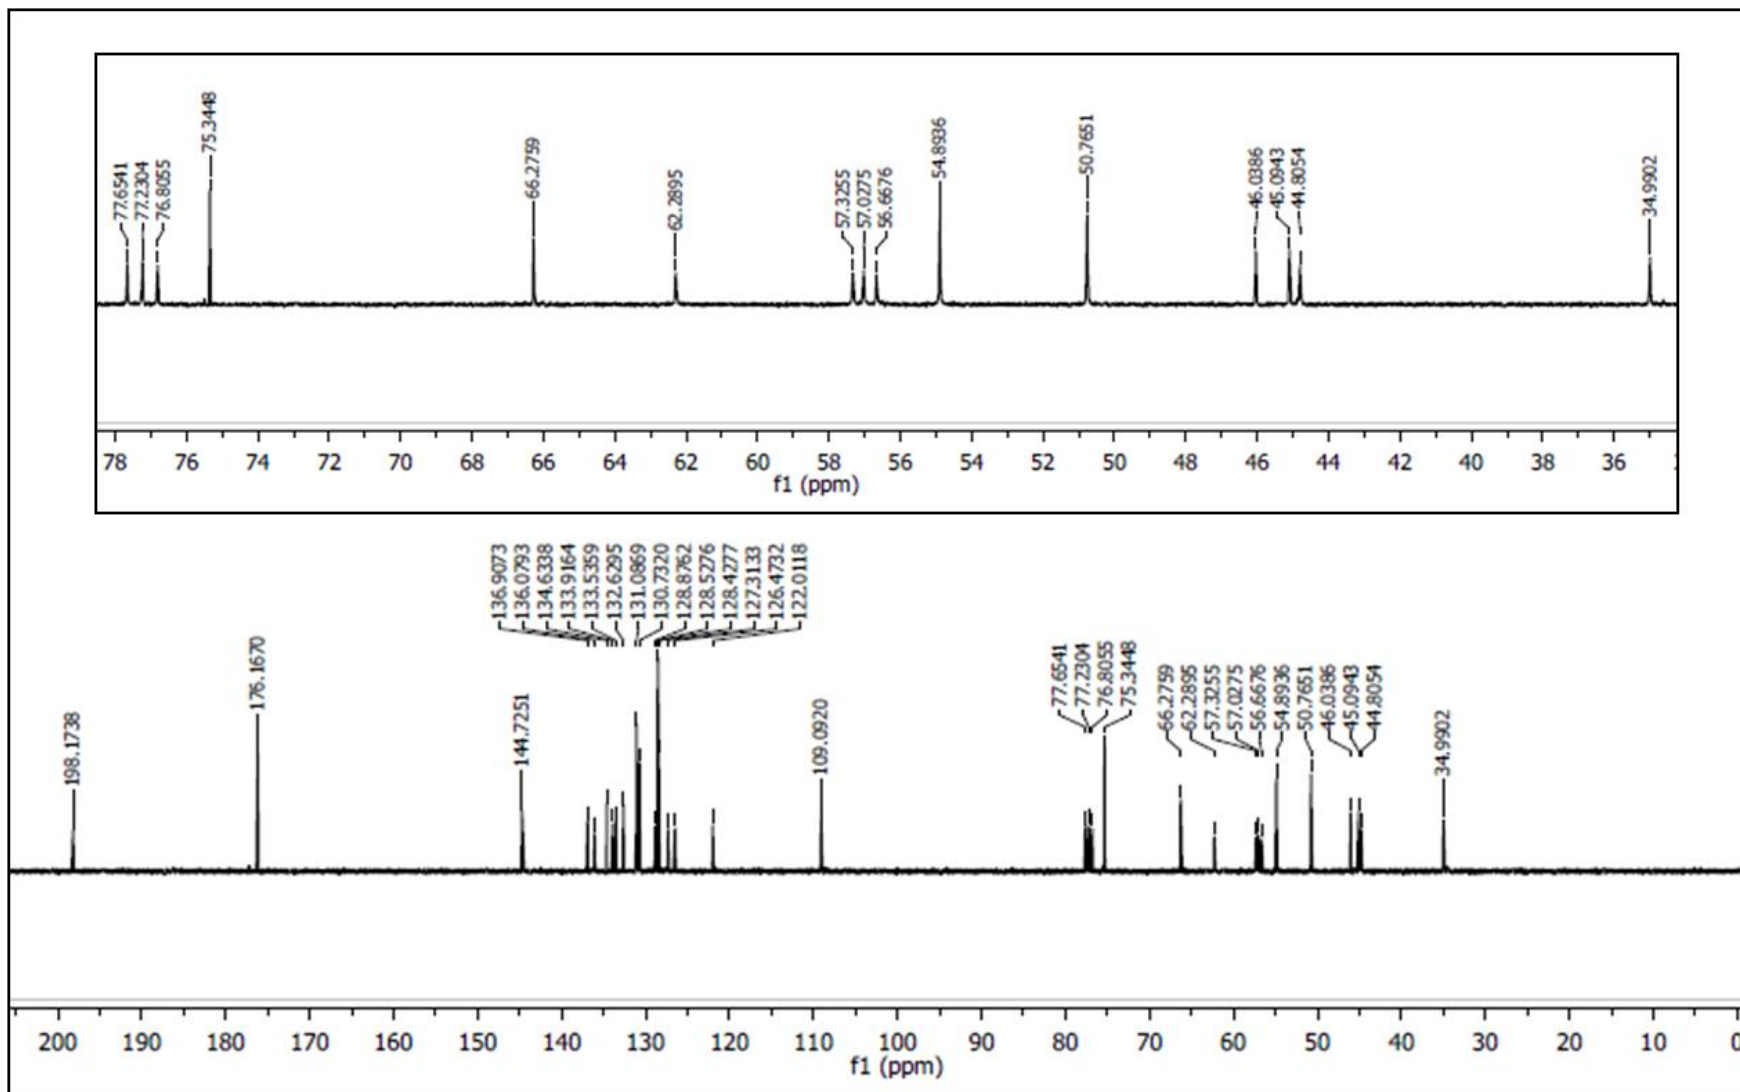

Figure S24.  $^{13}\text{C}$ -NMR spectrum of compound 35 in  $\text{CDCl}_3$ .

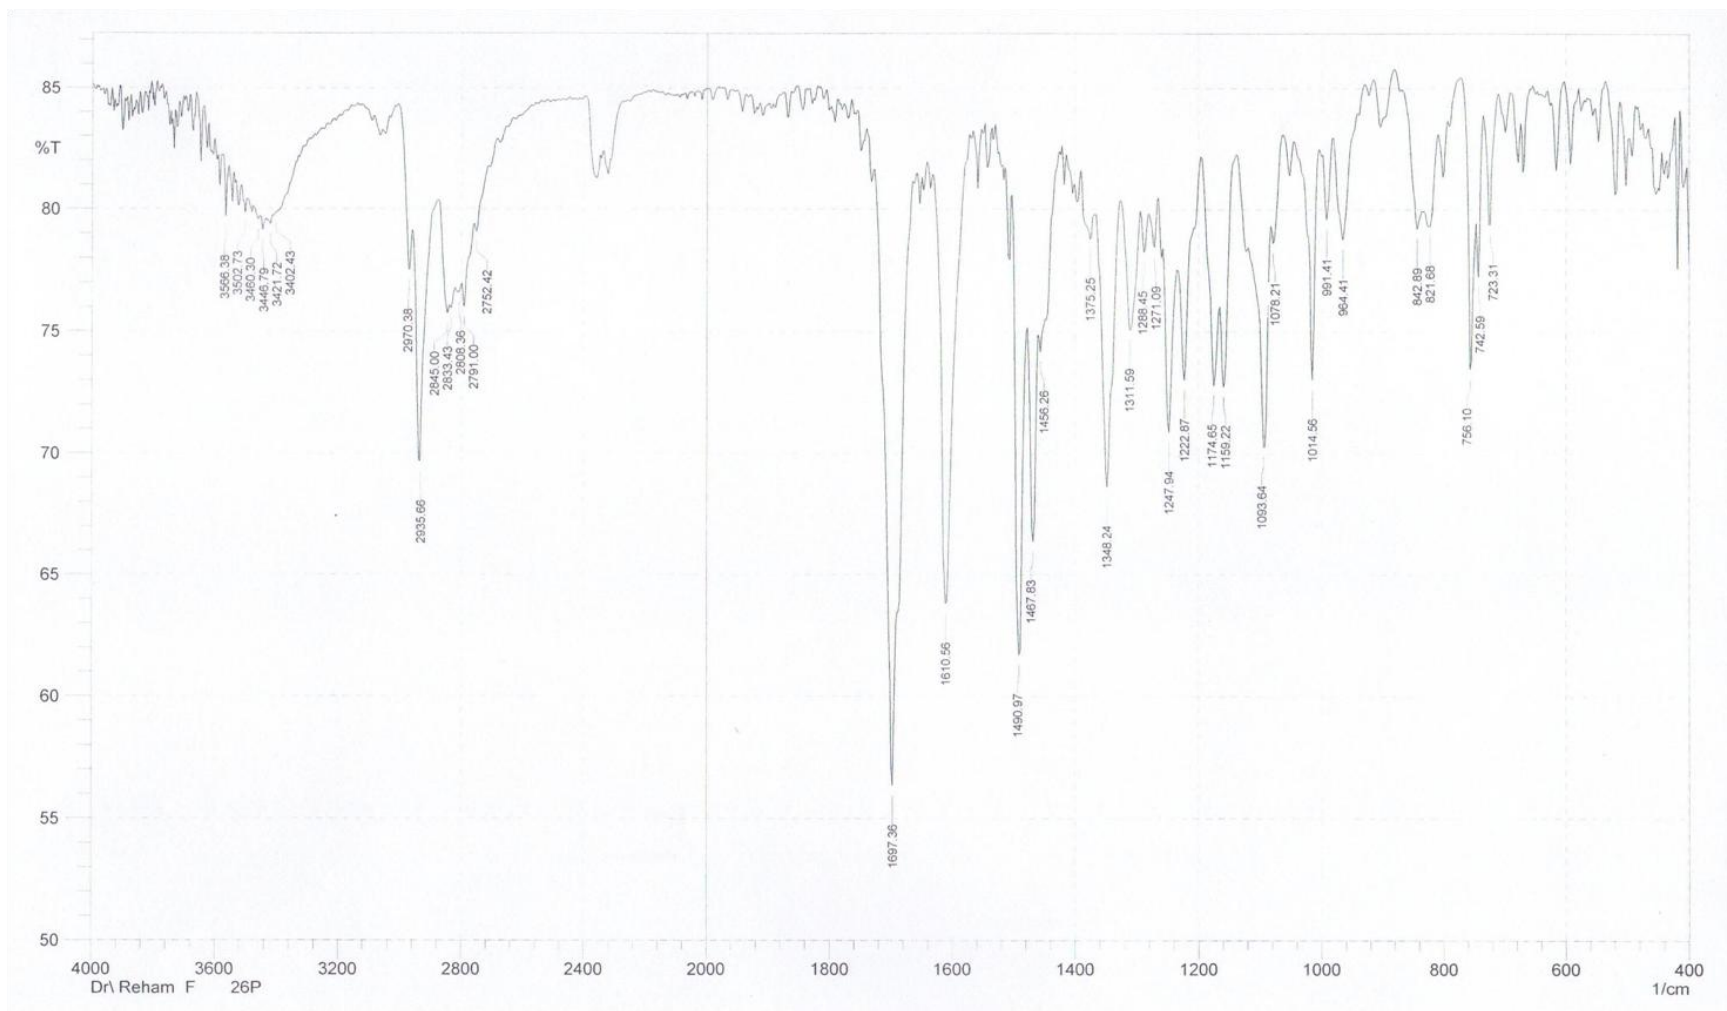

**Figure S25.** IR spectrum of compound **36** (KBr pellet).

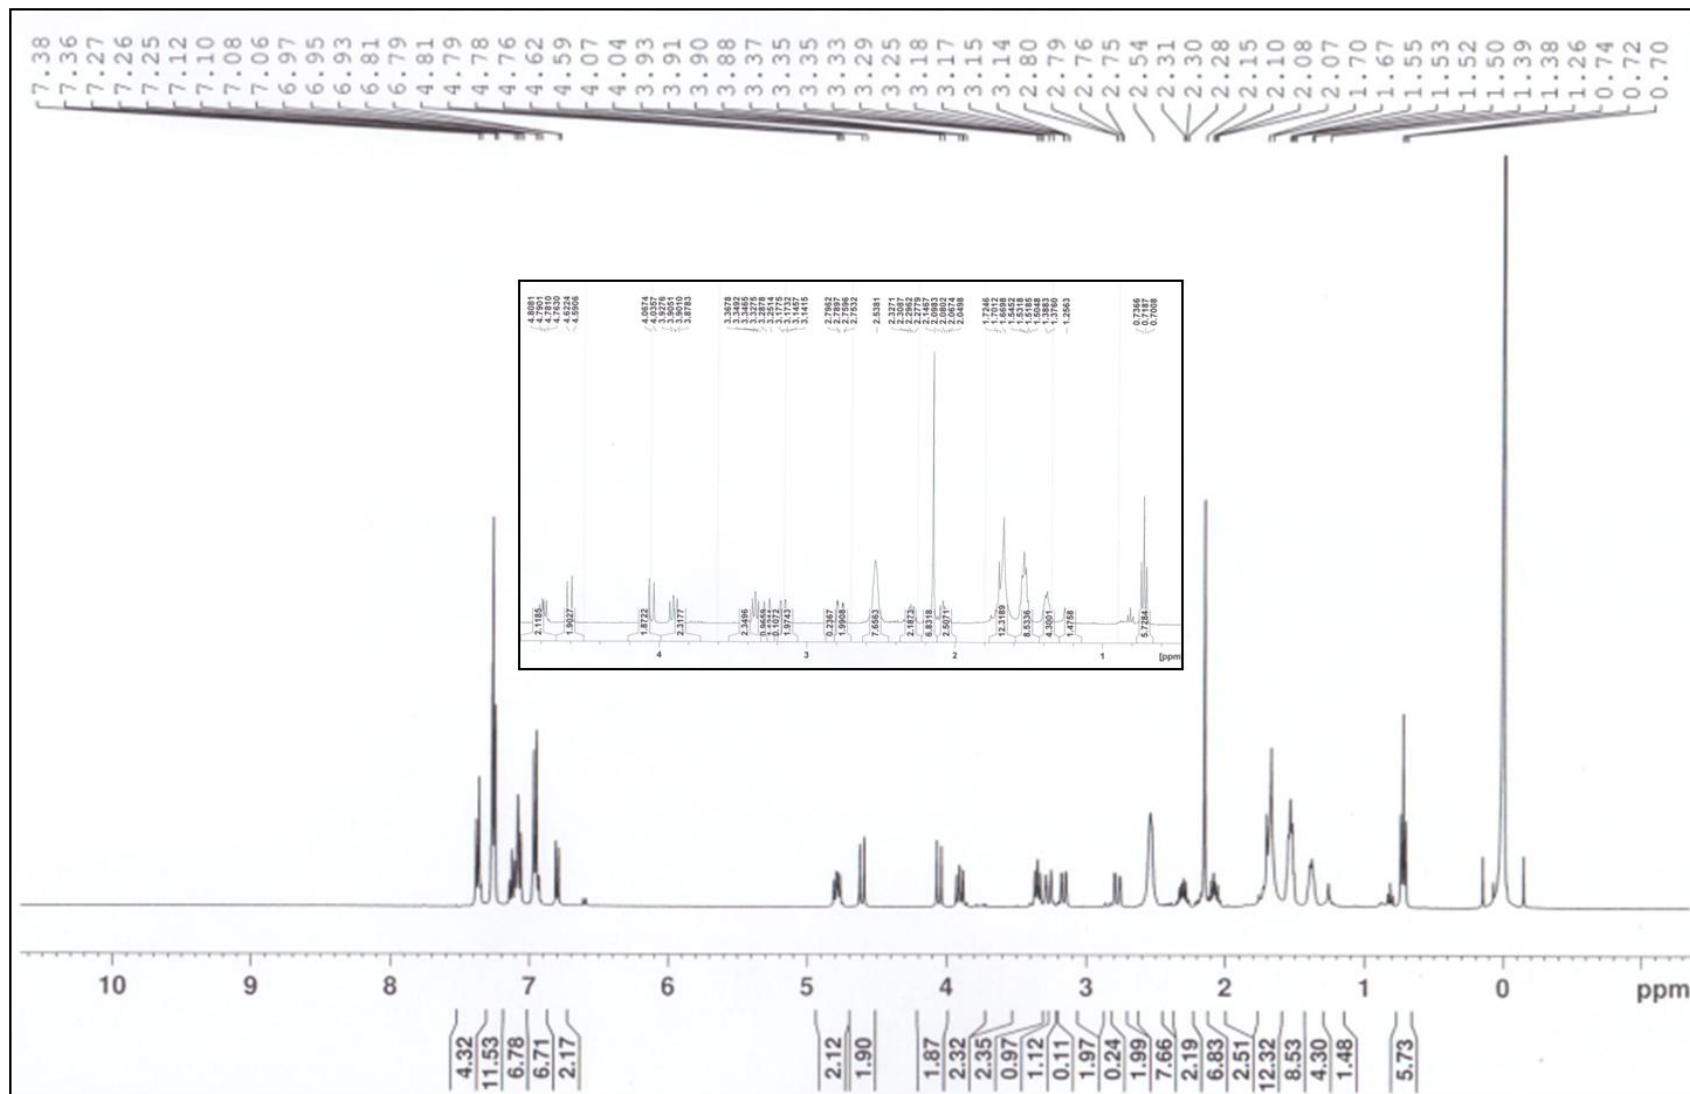

Figure S26. <sup>1</sup>H-NMR spectrum of compound **36** in CDCl<sub>3</sub>.

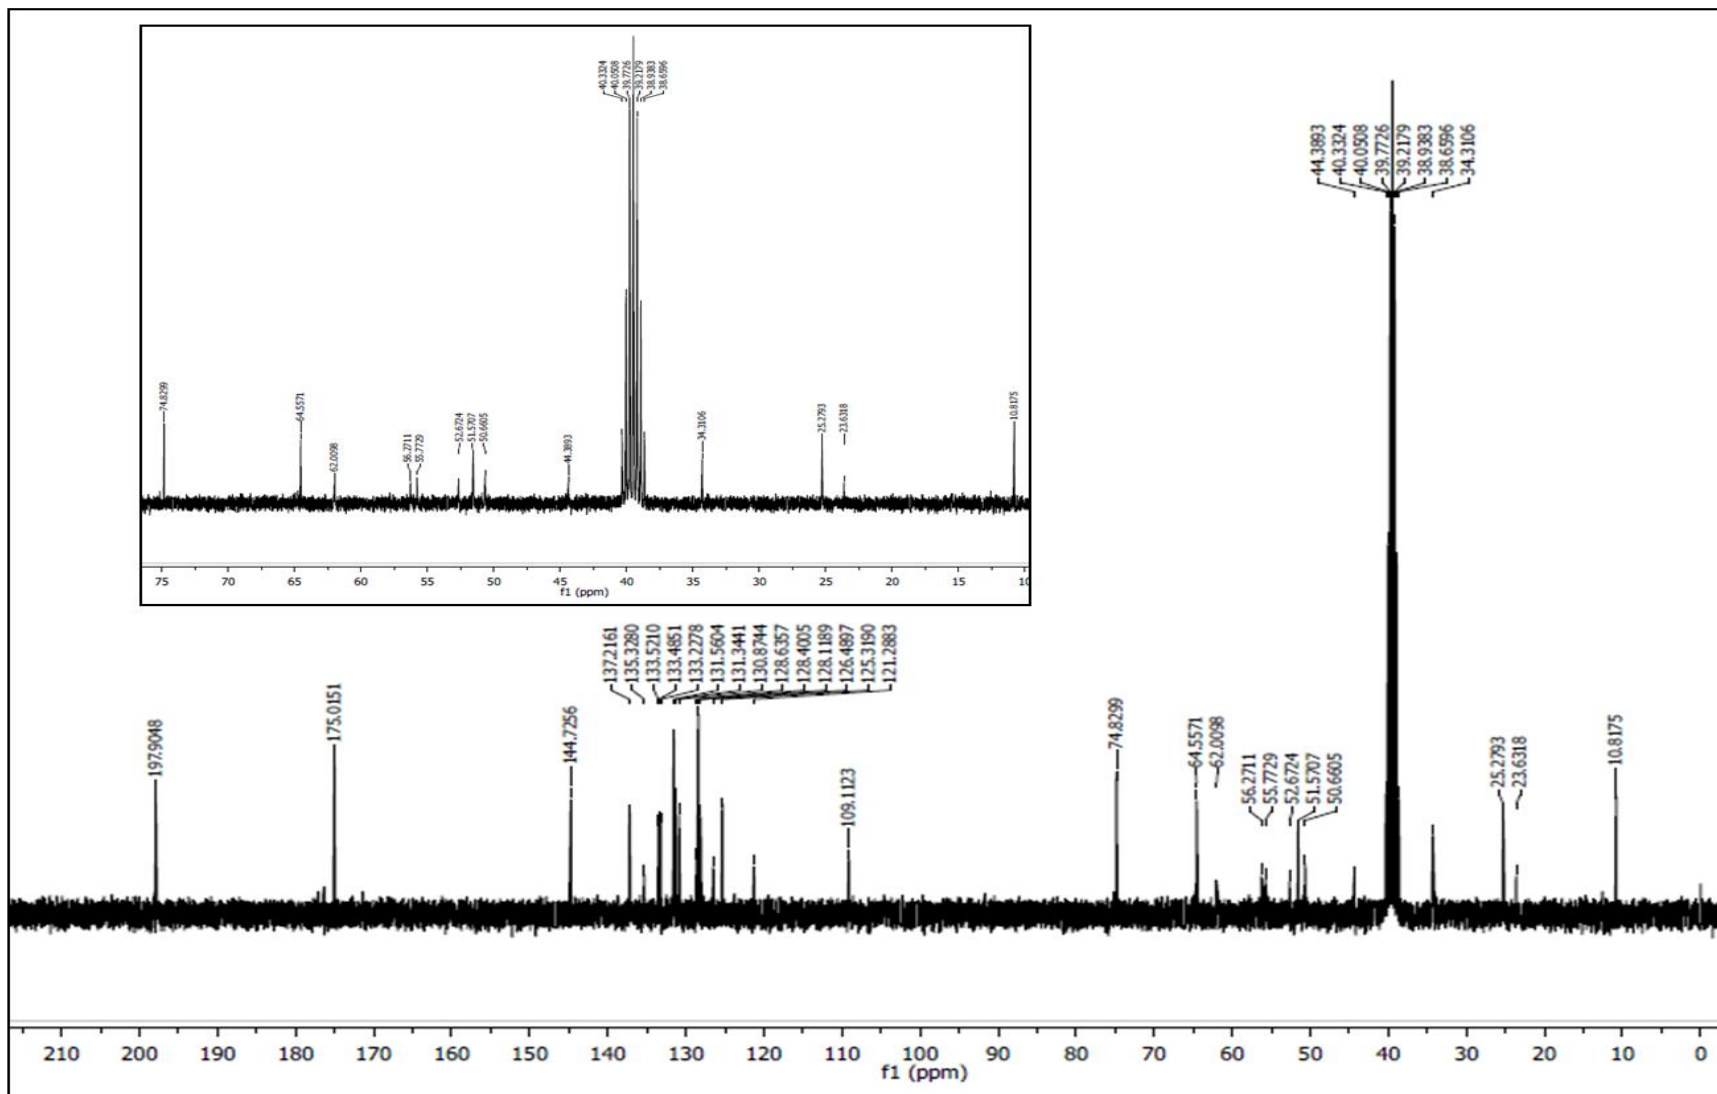

Figure S27.  $^{13}\text{C}$ -NMR spectrum of compound **36** in  $\text{DMSO-}d_6$ .

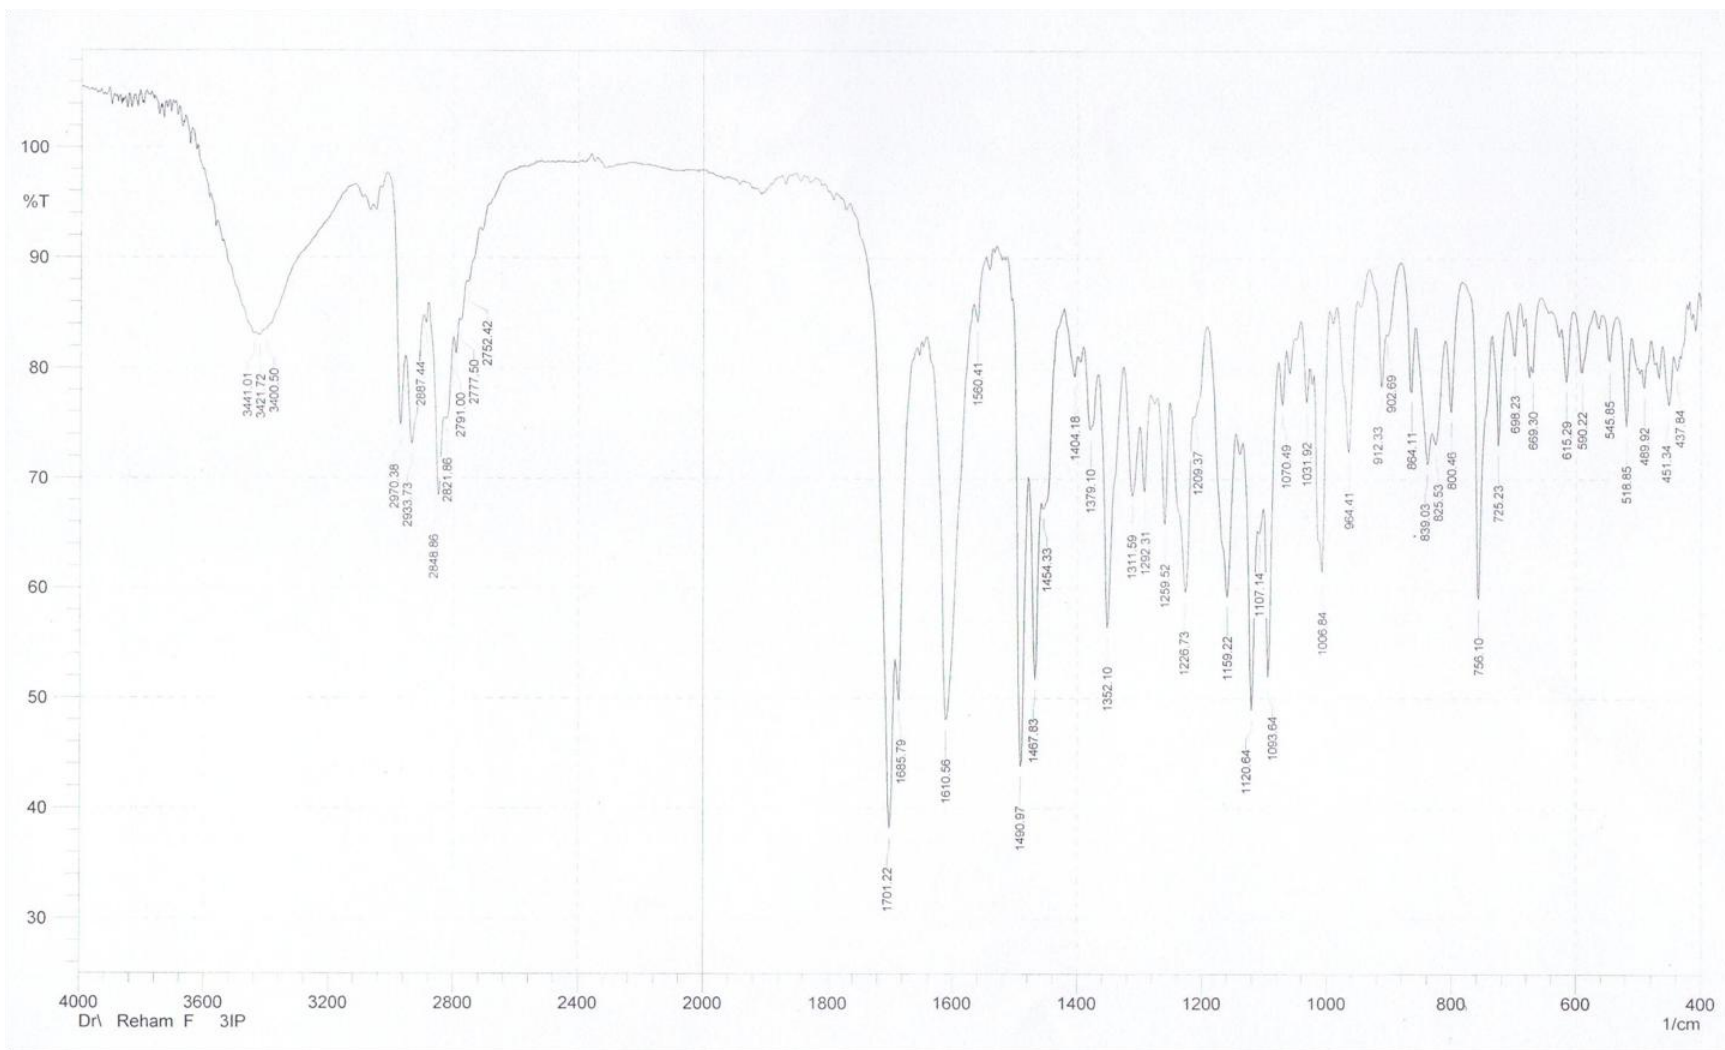

**Figure S28.** IR spectrum of compound **37** (KBr pellet).

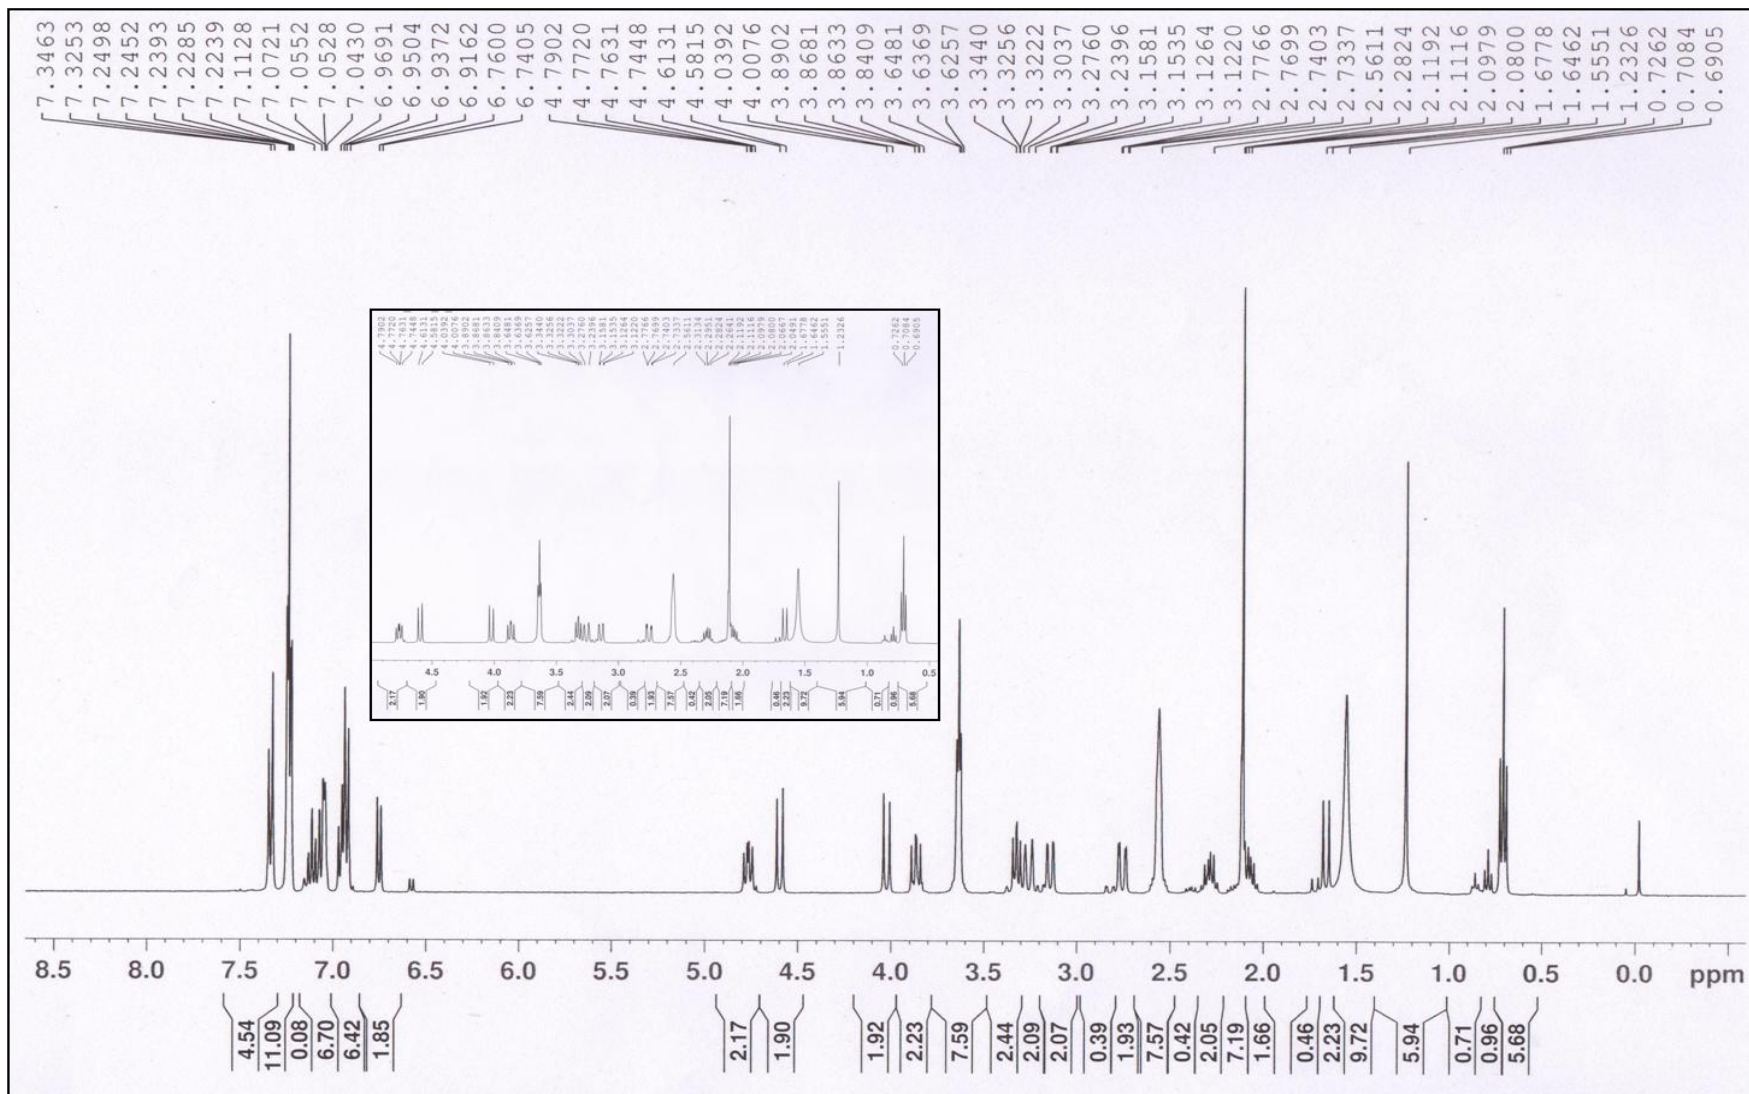

Figure S29. <sup>1</sup>H-NMR spectrum of compound 37 in CDCl<sub>3</sub>.

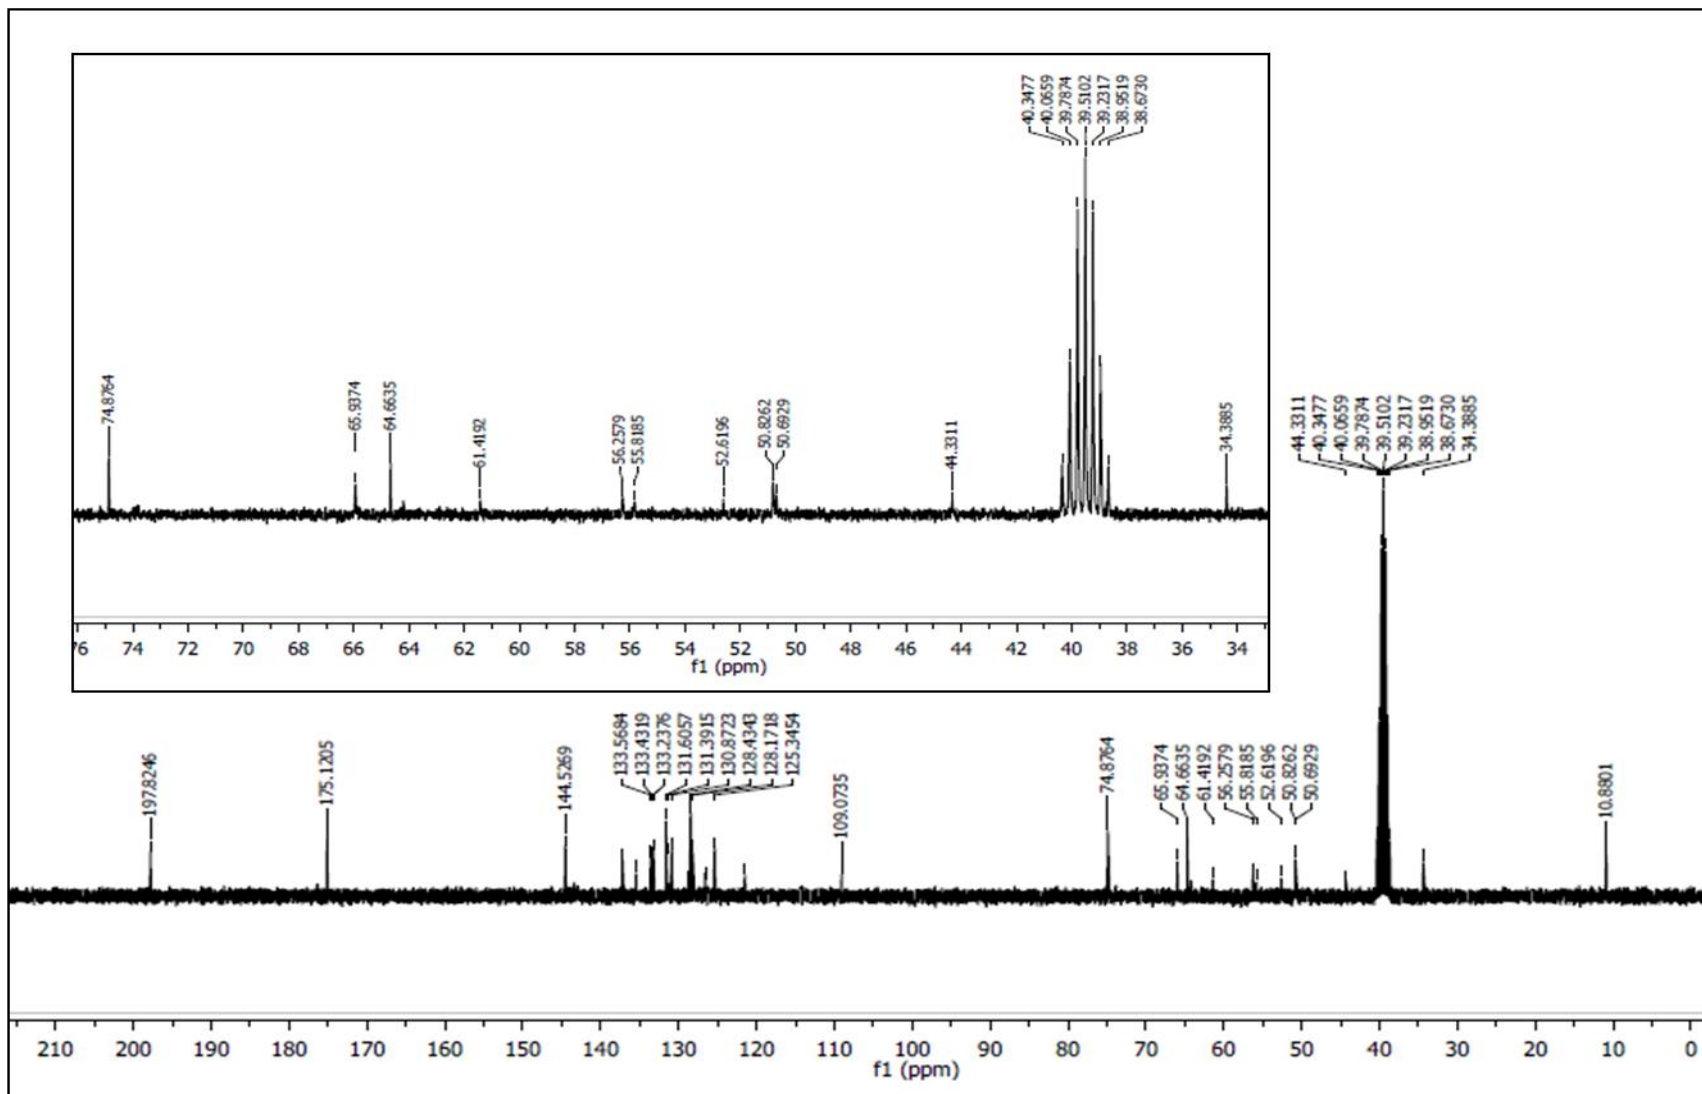

Figure S30.  $^{13}\text{C}$ -NMR spectrum of compound **37** in  $\text{DMSO-}d_6$ .

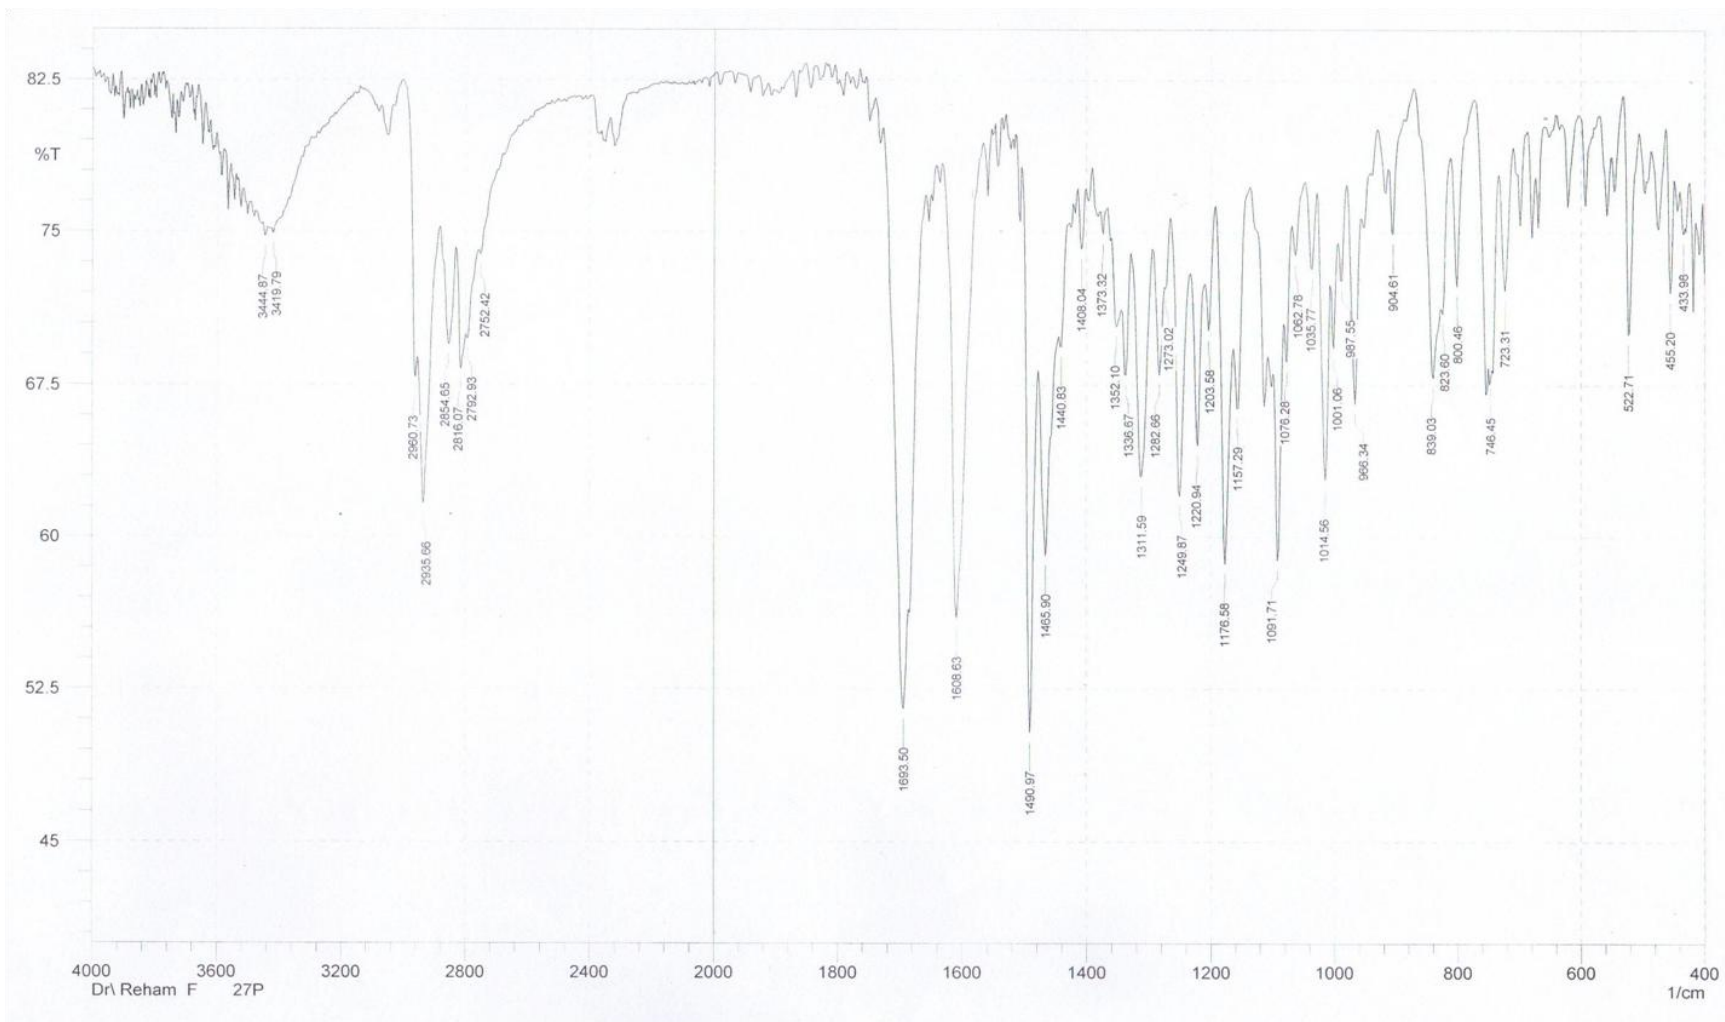

**Figure S31.** IR spectrum of compound **38** (KBr pellet).



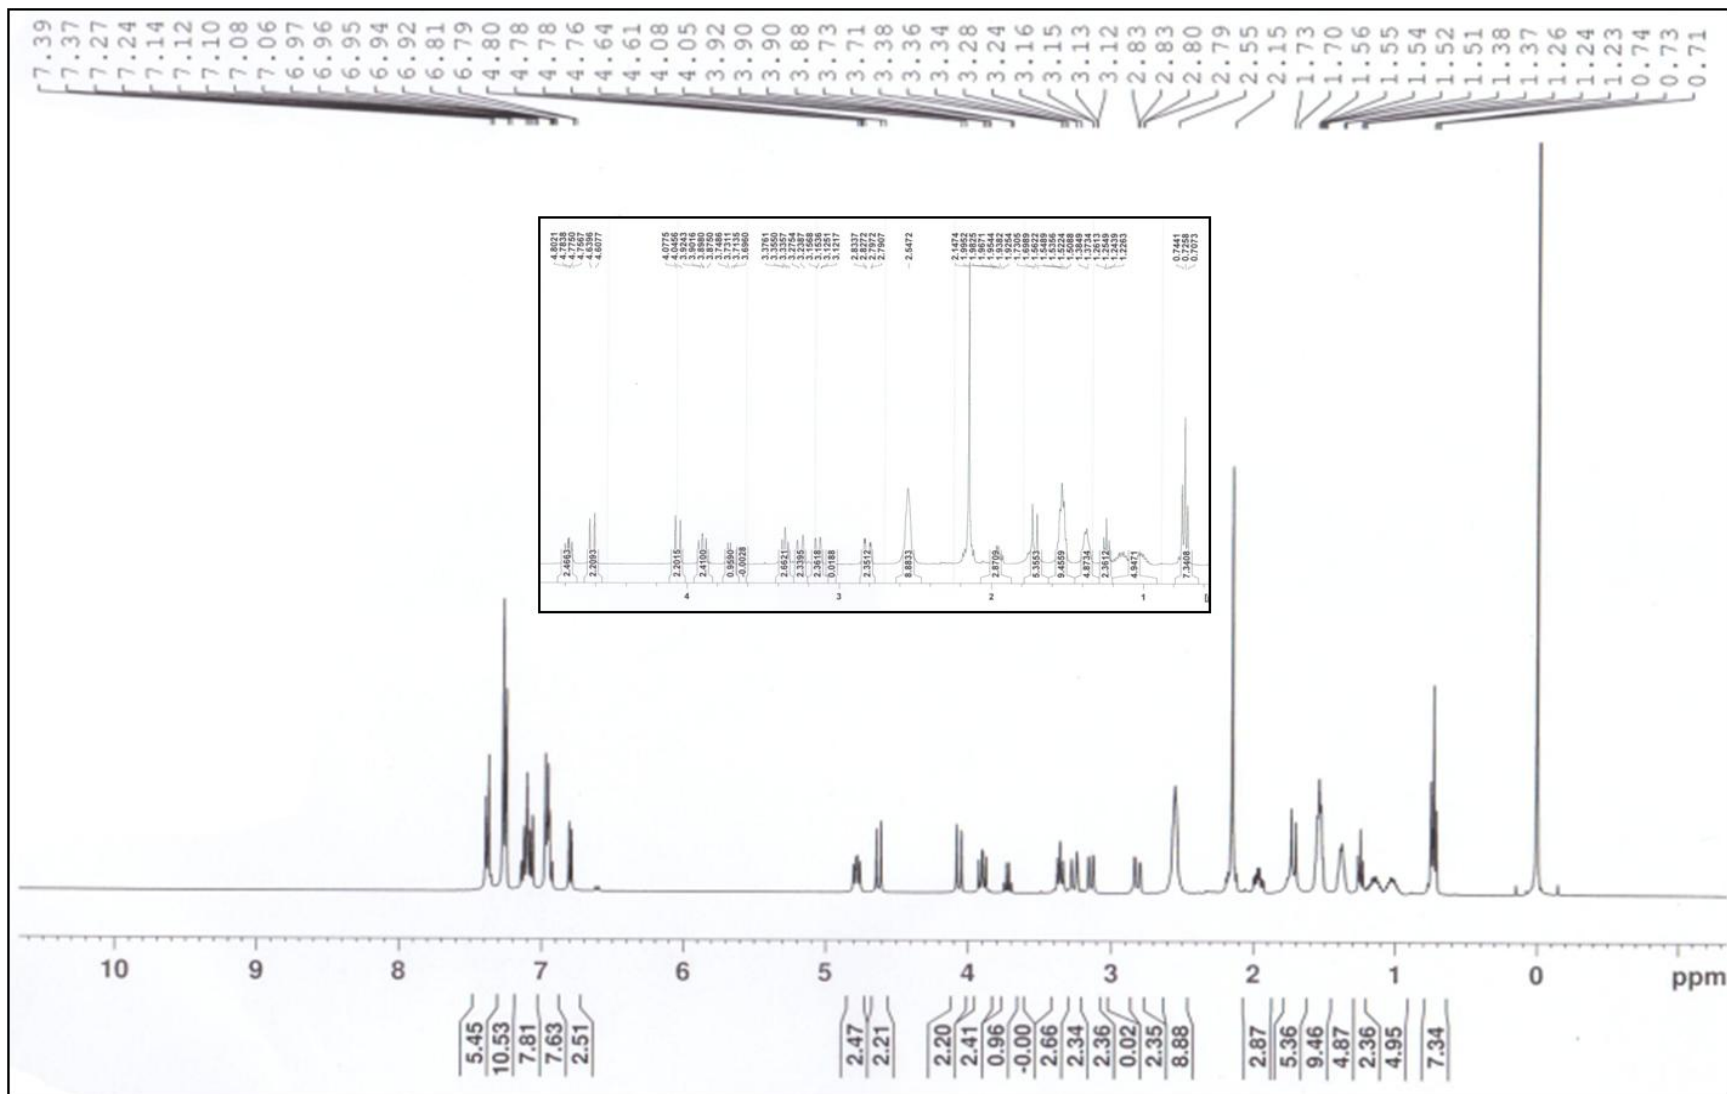

Figure S32.  $^1\text{H-NMR}$  spectrum of compound **38** in  $\text{CDCl}_3$ .

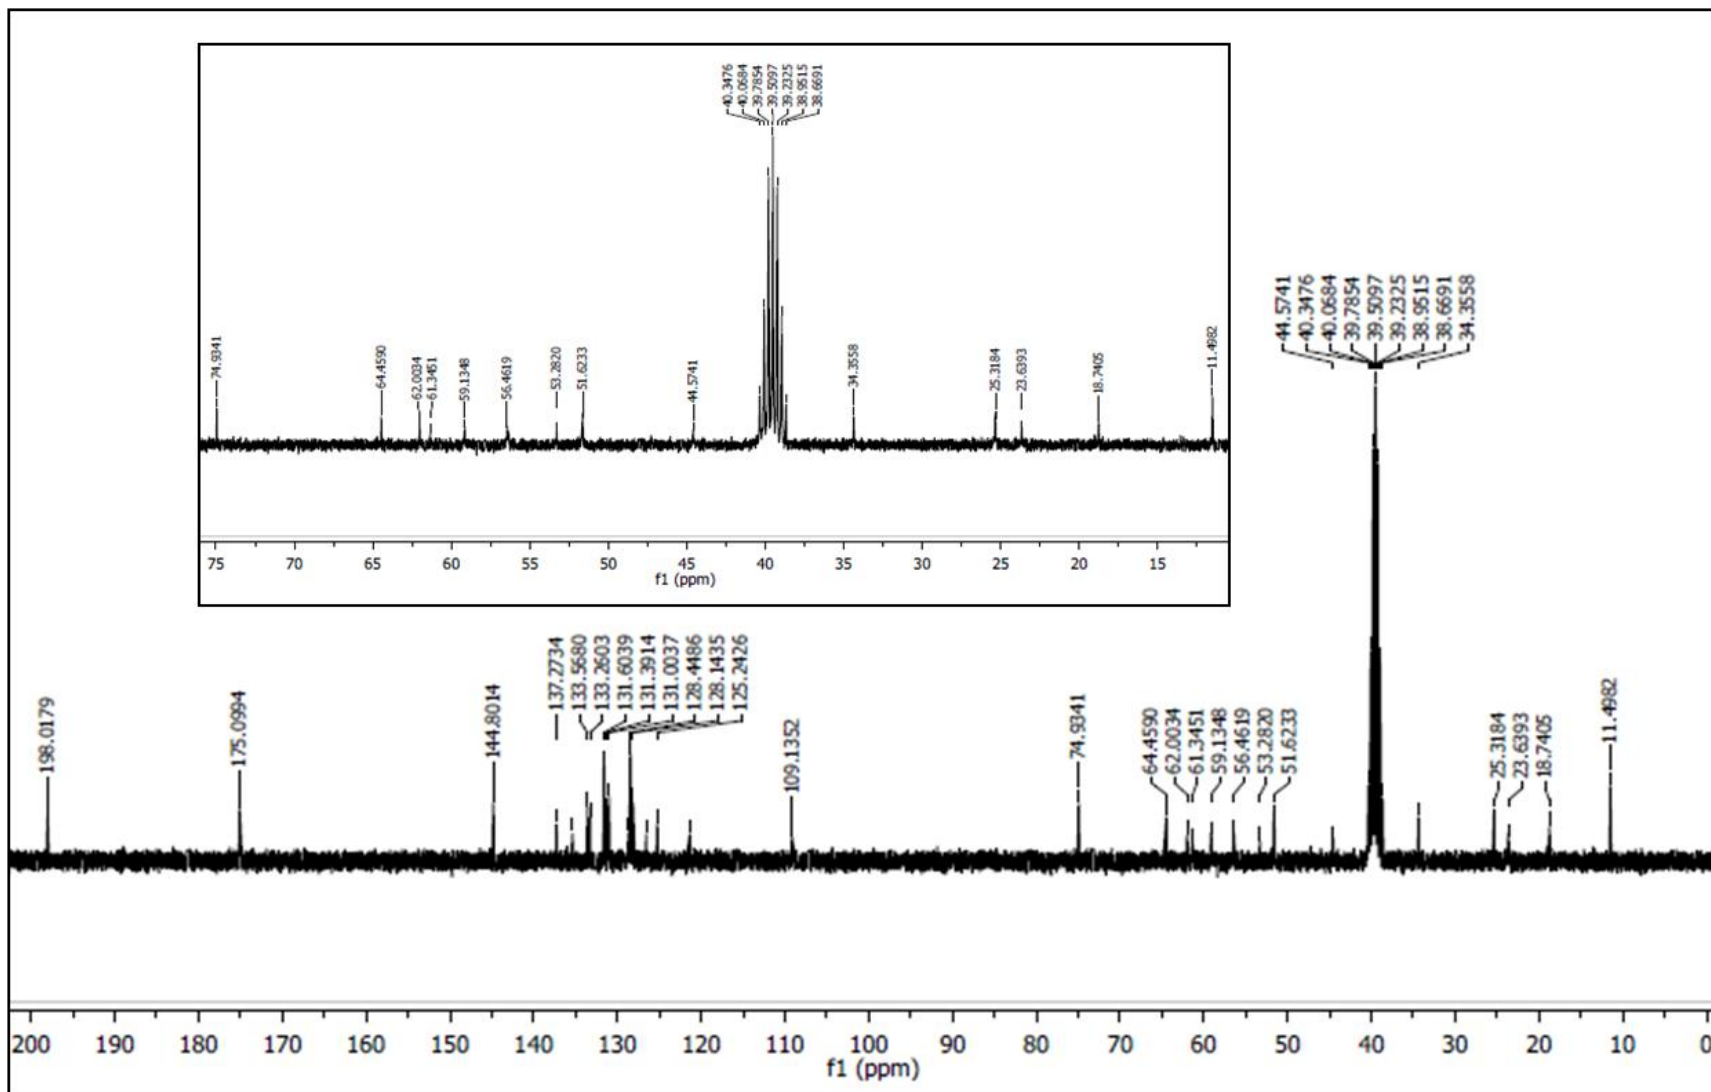

Figure S33.  $^{13}\text{C}$ -NMR spectrum of compound **38** in  $\text{DMSO-}d_6$ .

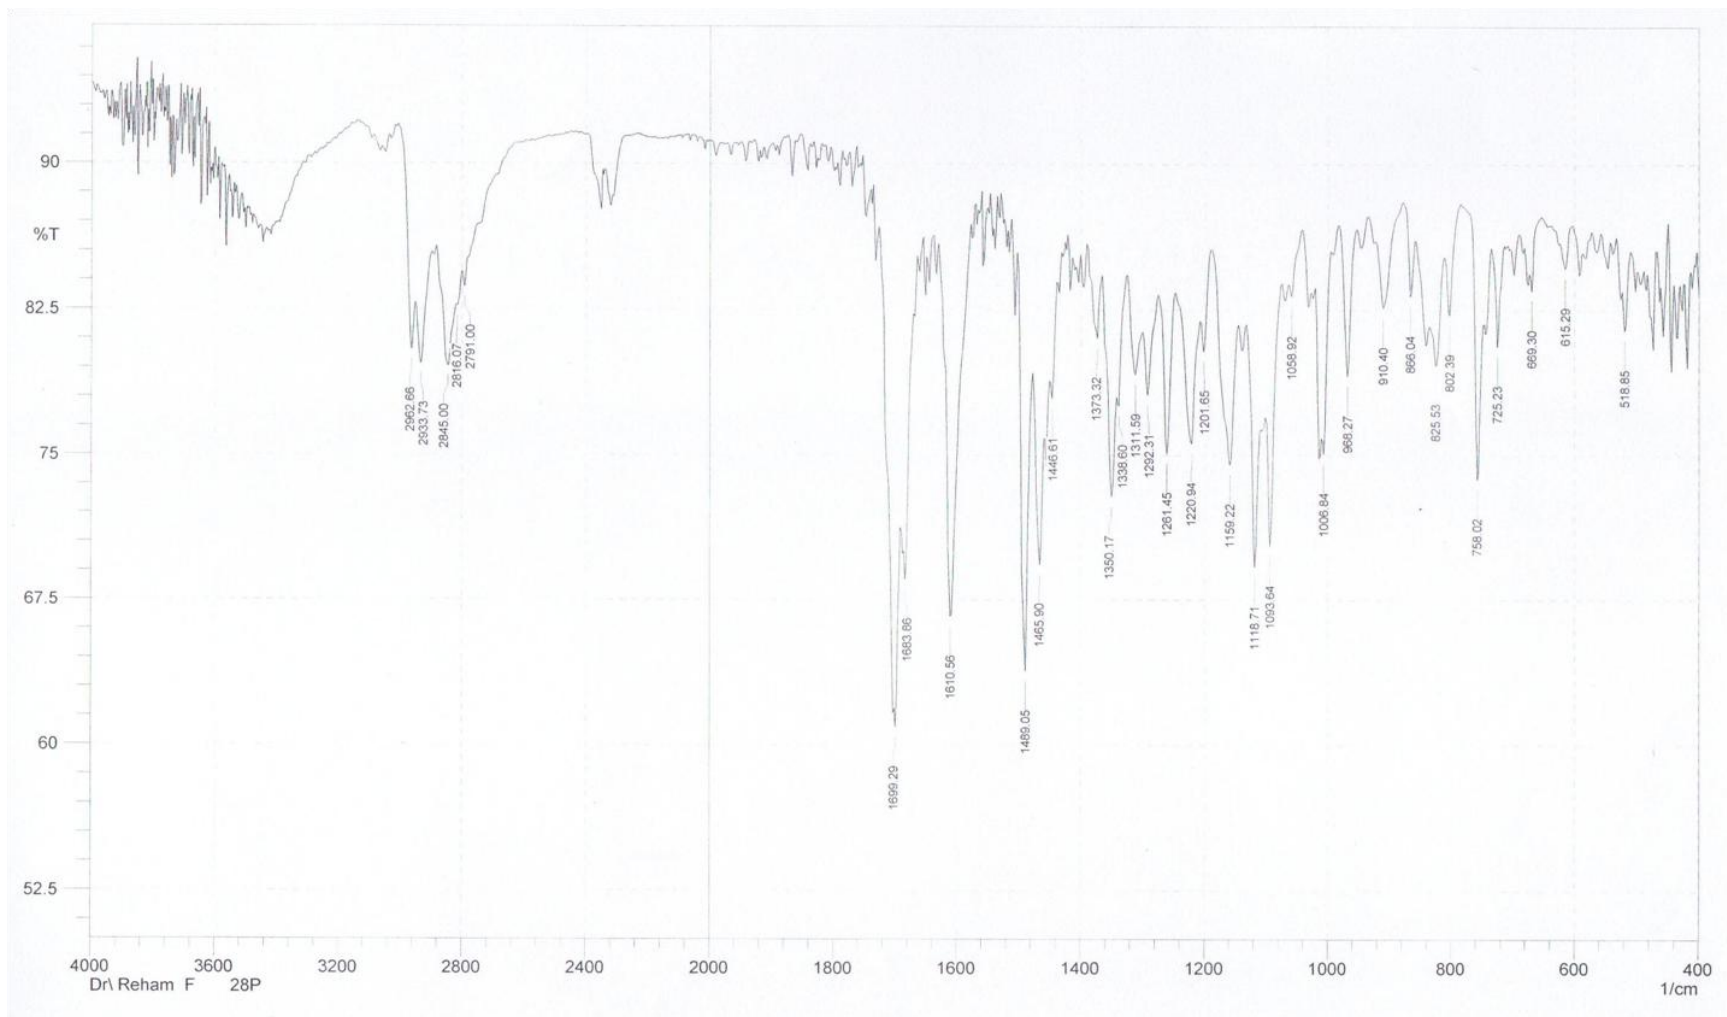

**Figure S34.** IR spectrum of compound **39** (KBr pellet).



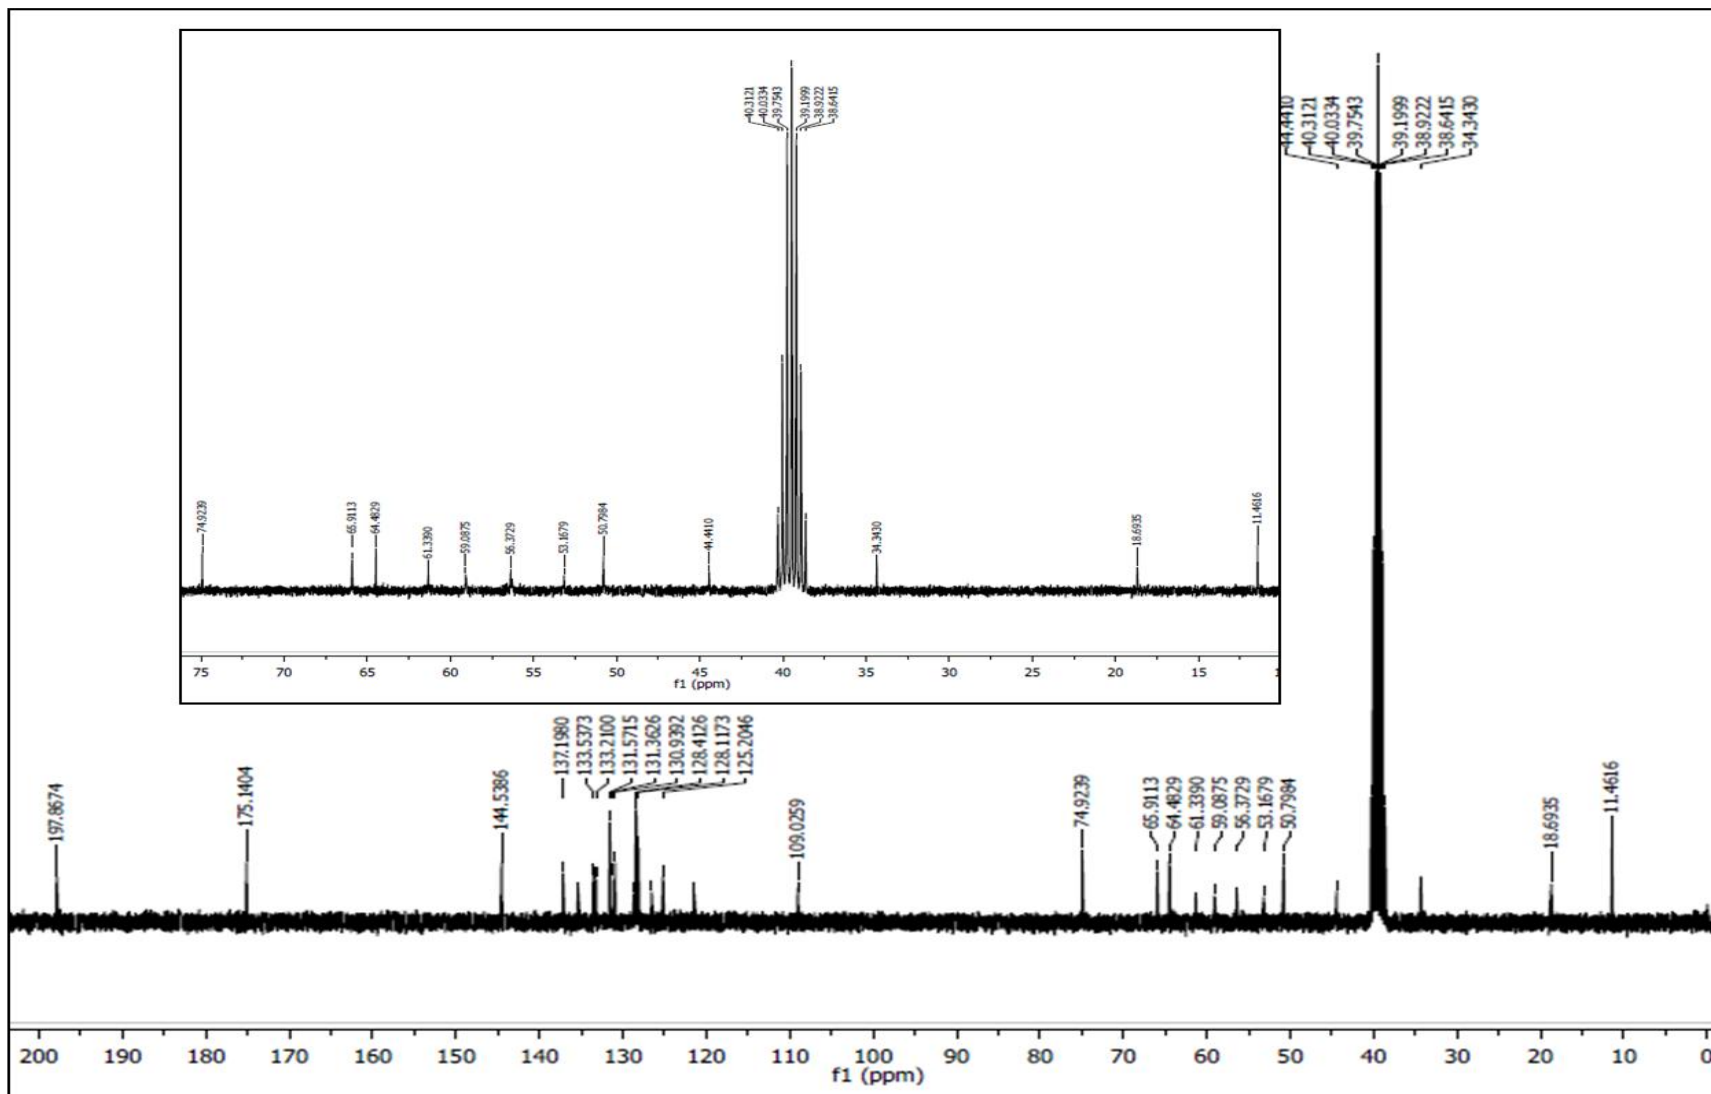

Figure S36.  $^{13}\text{C}$ -NMR spectrum of compound **39** in  $\text{DMSO-}d_6$ .

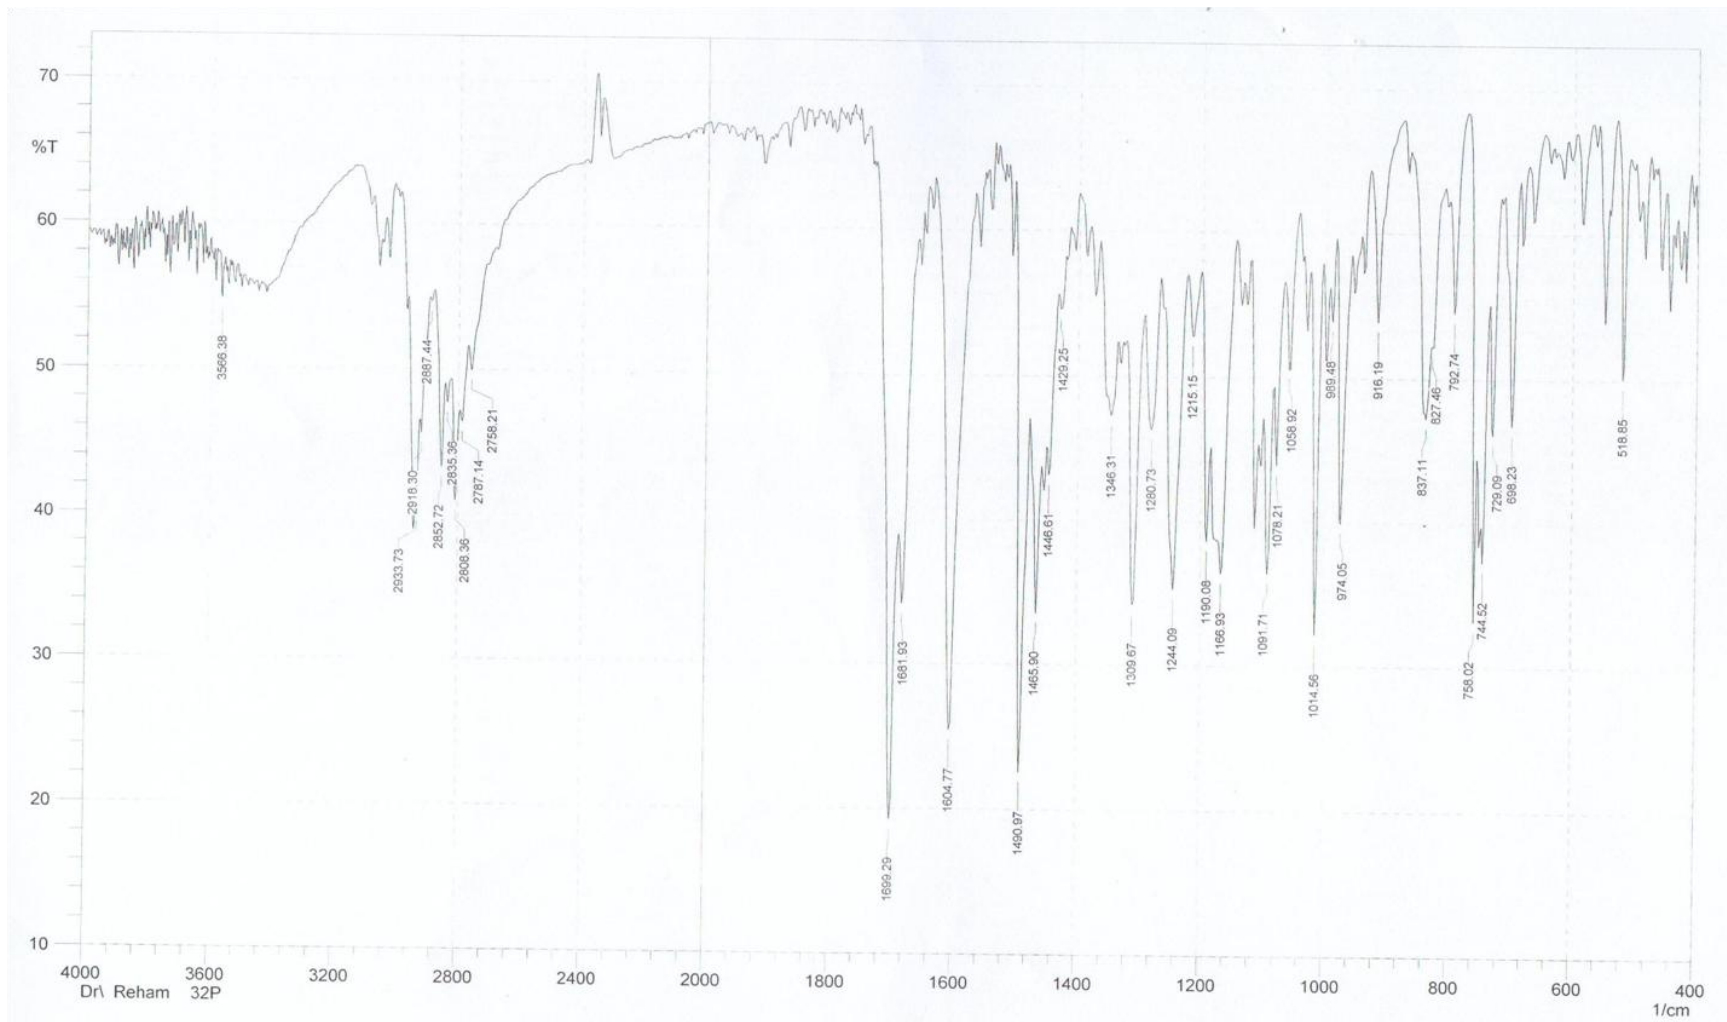

**Figure S37.** IR spectrum of compound **40** (KBr pellet).

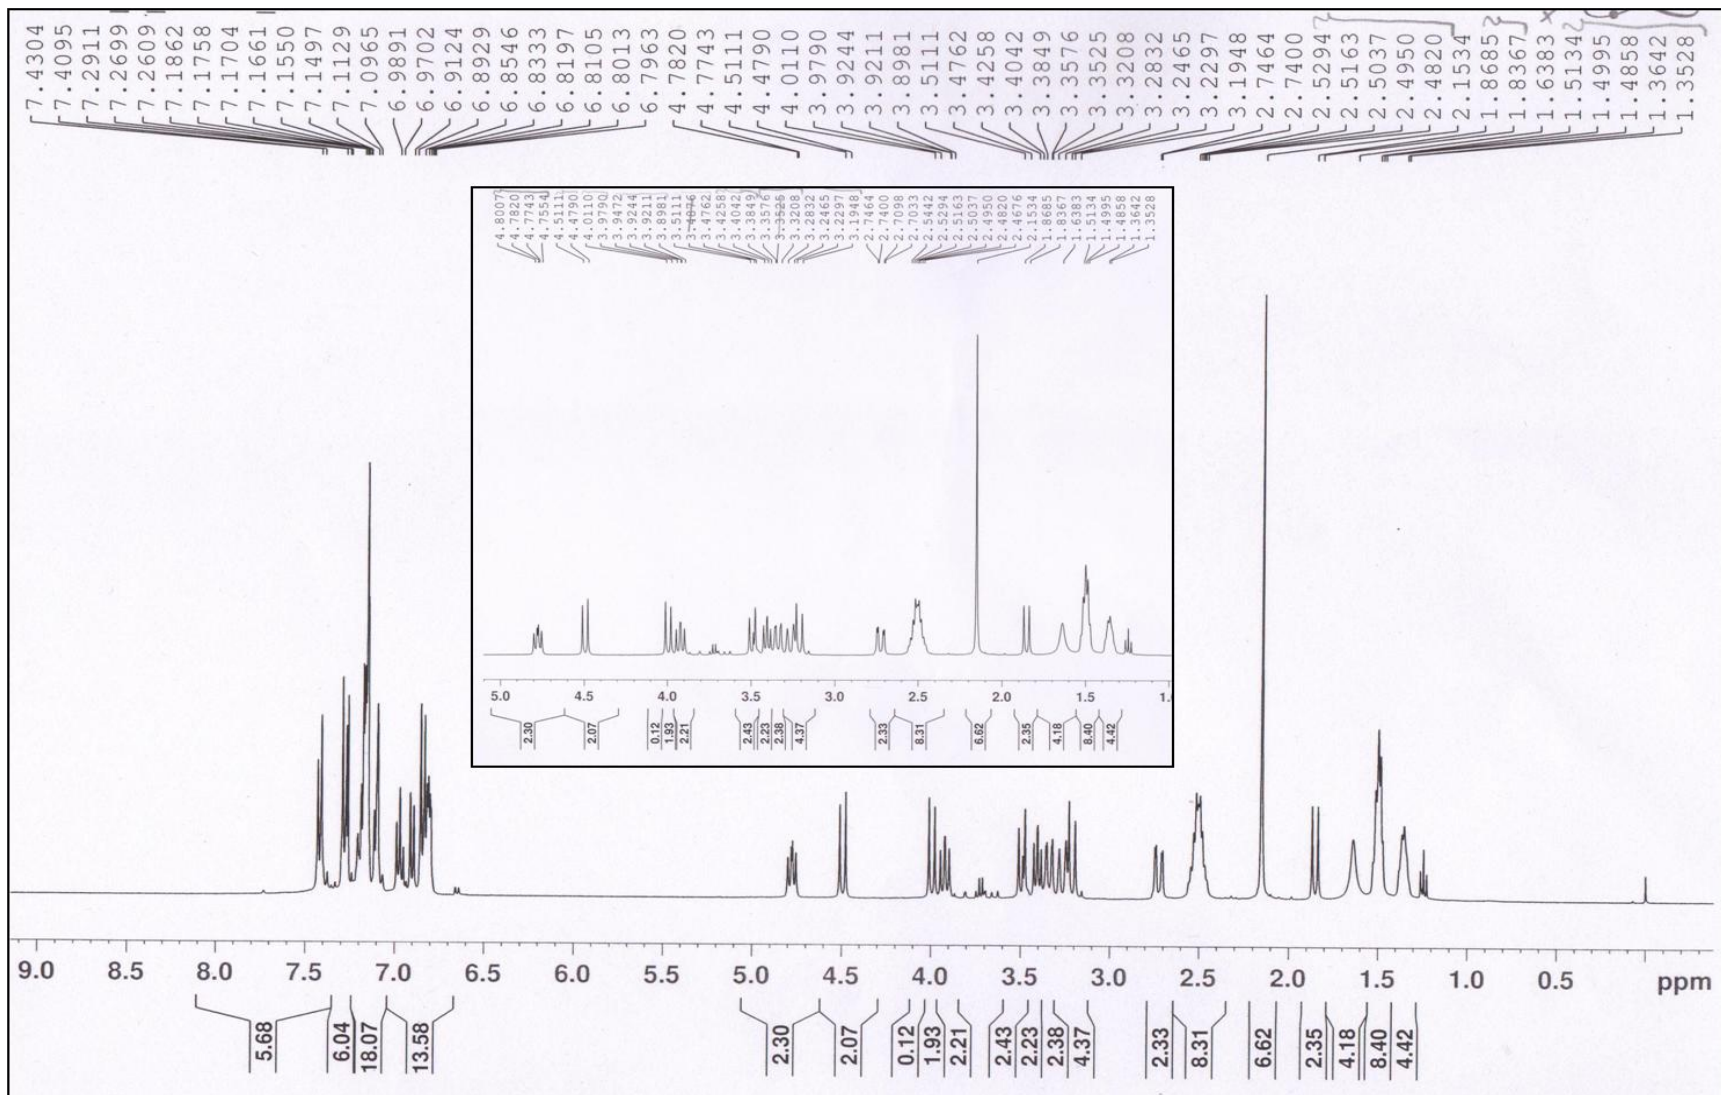

Figure S38. <sup>1</sup>H-NMR spectrum of compound 40 in CDCl<sub>3</sub>.

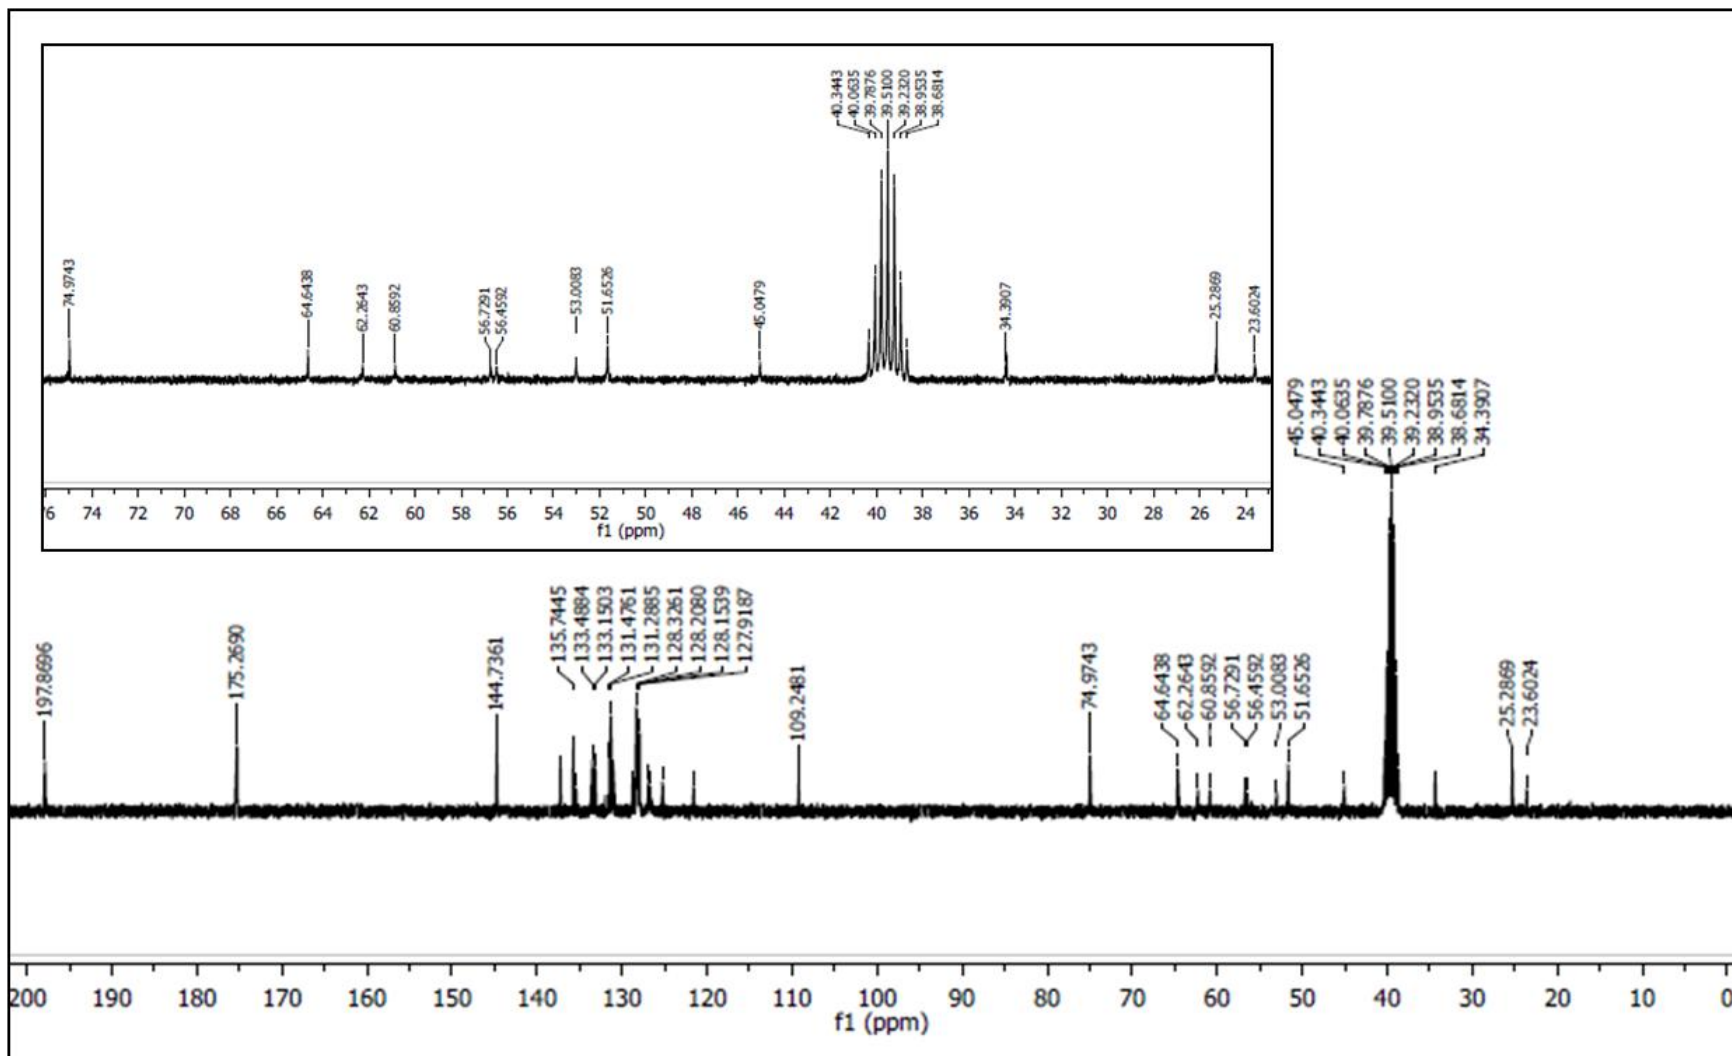

**Figure S39.**  $^{13}\text{C}$ -NMR spectrum of compound **40** in  $\text{DMSO-}d_6$ .



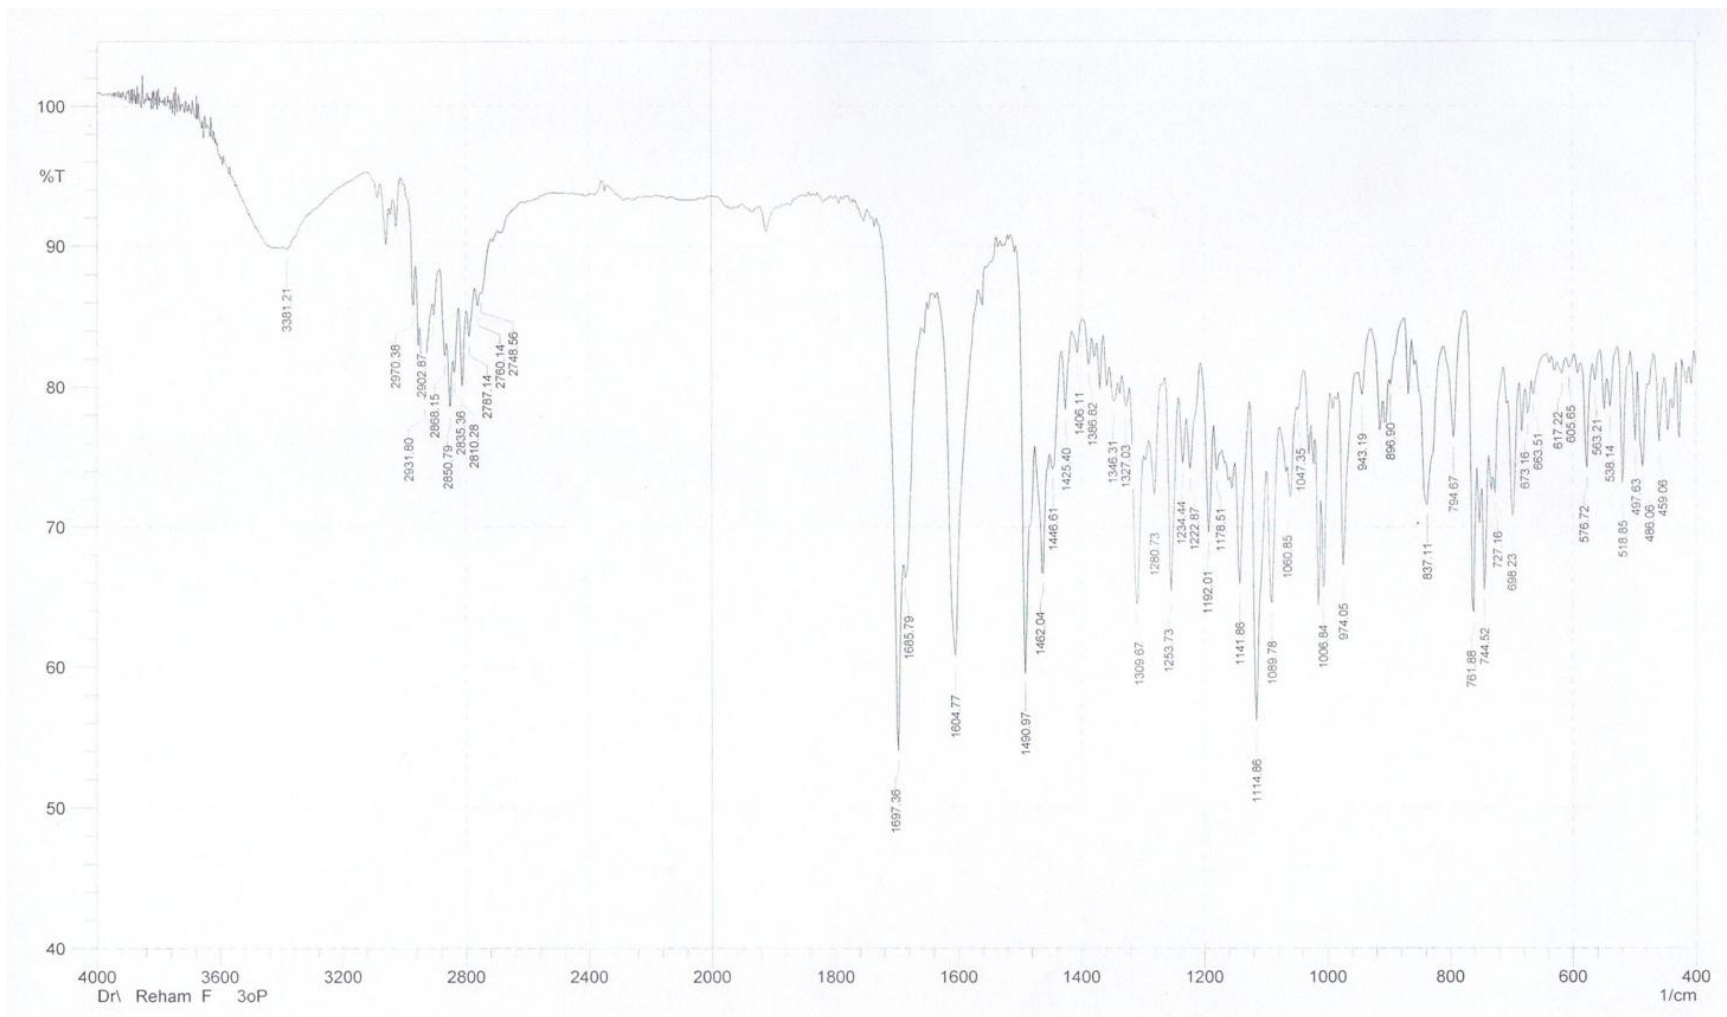

**Figure S40.** IR spectrum of compound **41** (KBr pellet).

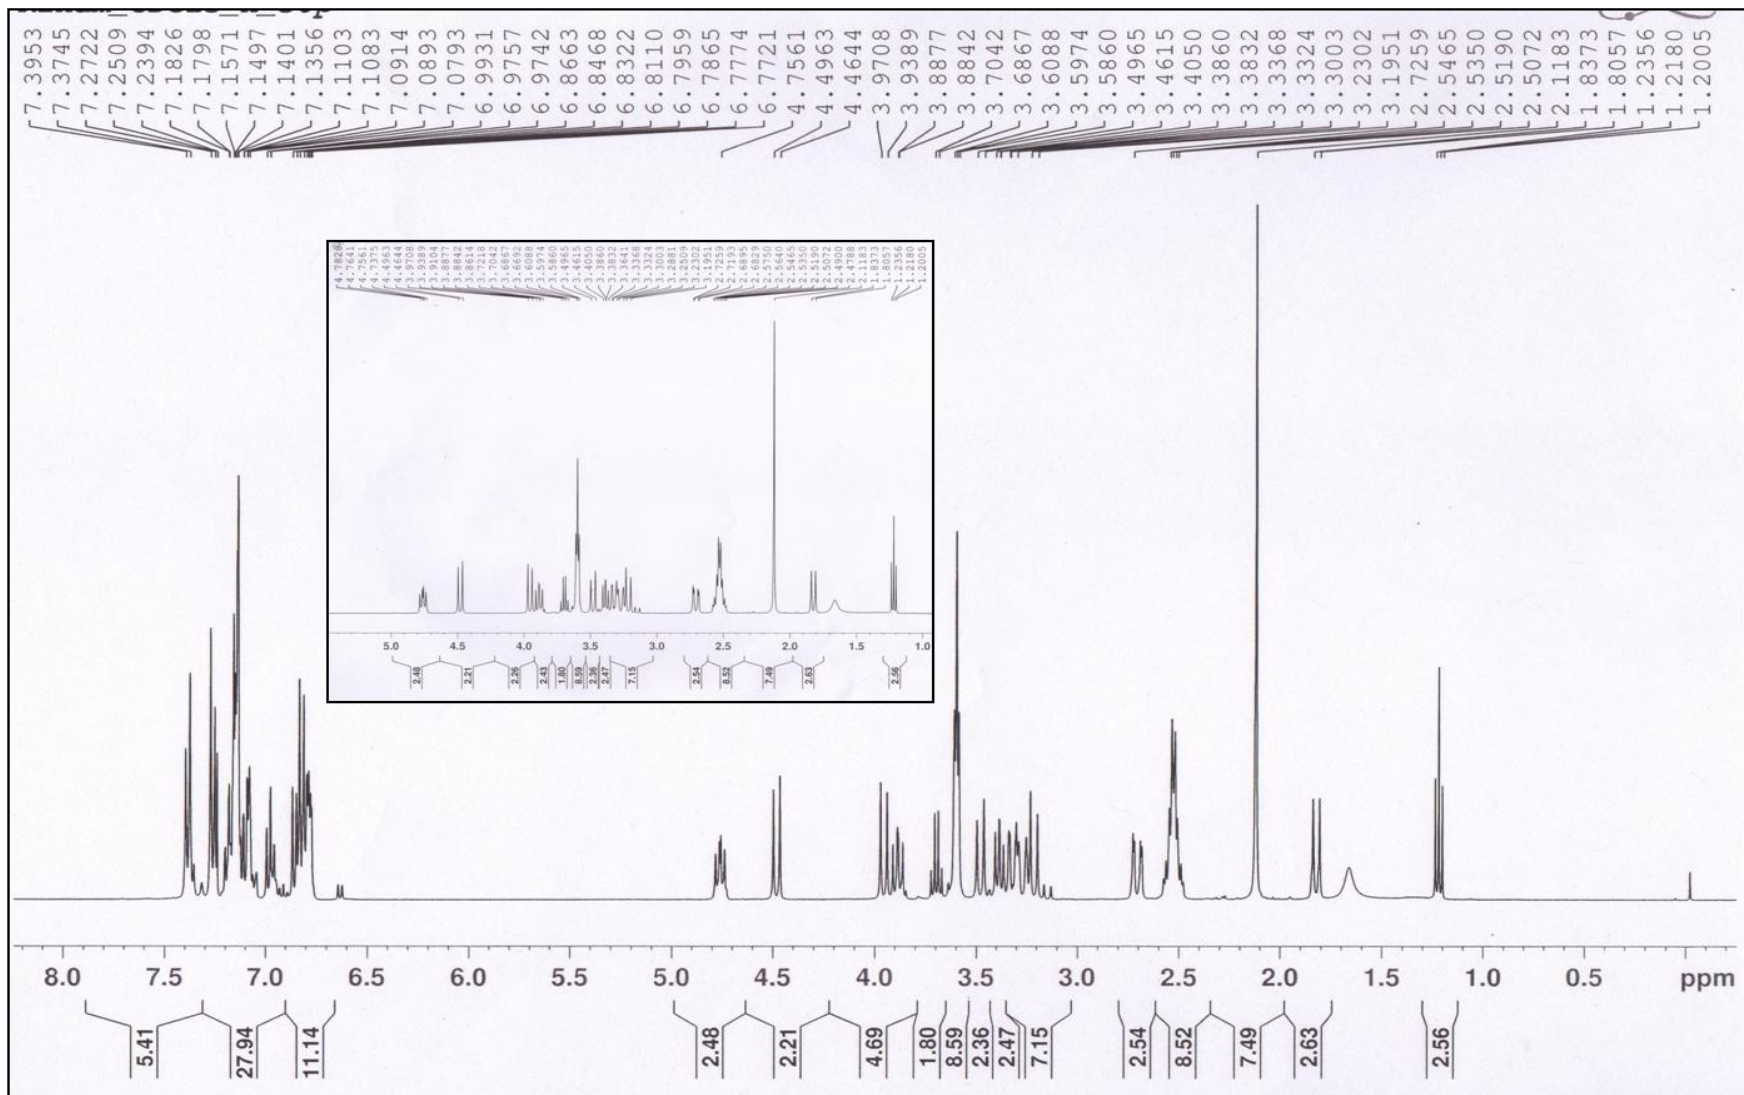

Figure S41. <sup>1</sup>H-NMR spectrum of compound 41 in CDCl<sub>3</sub>.

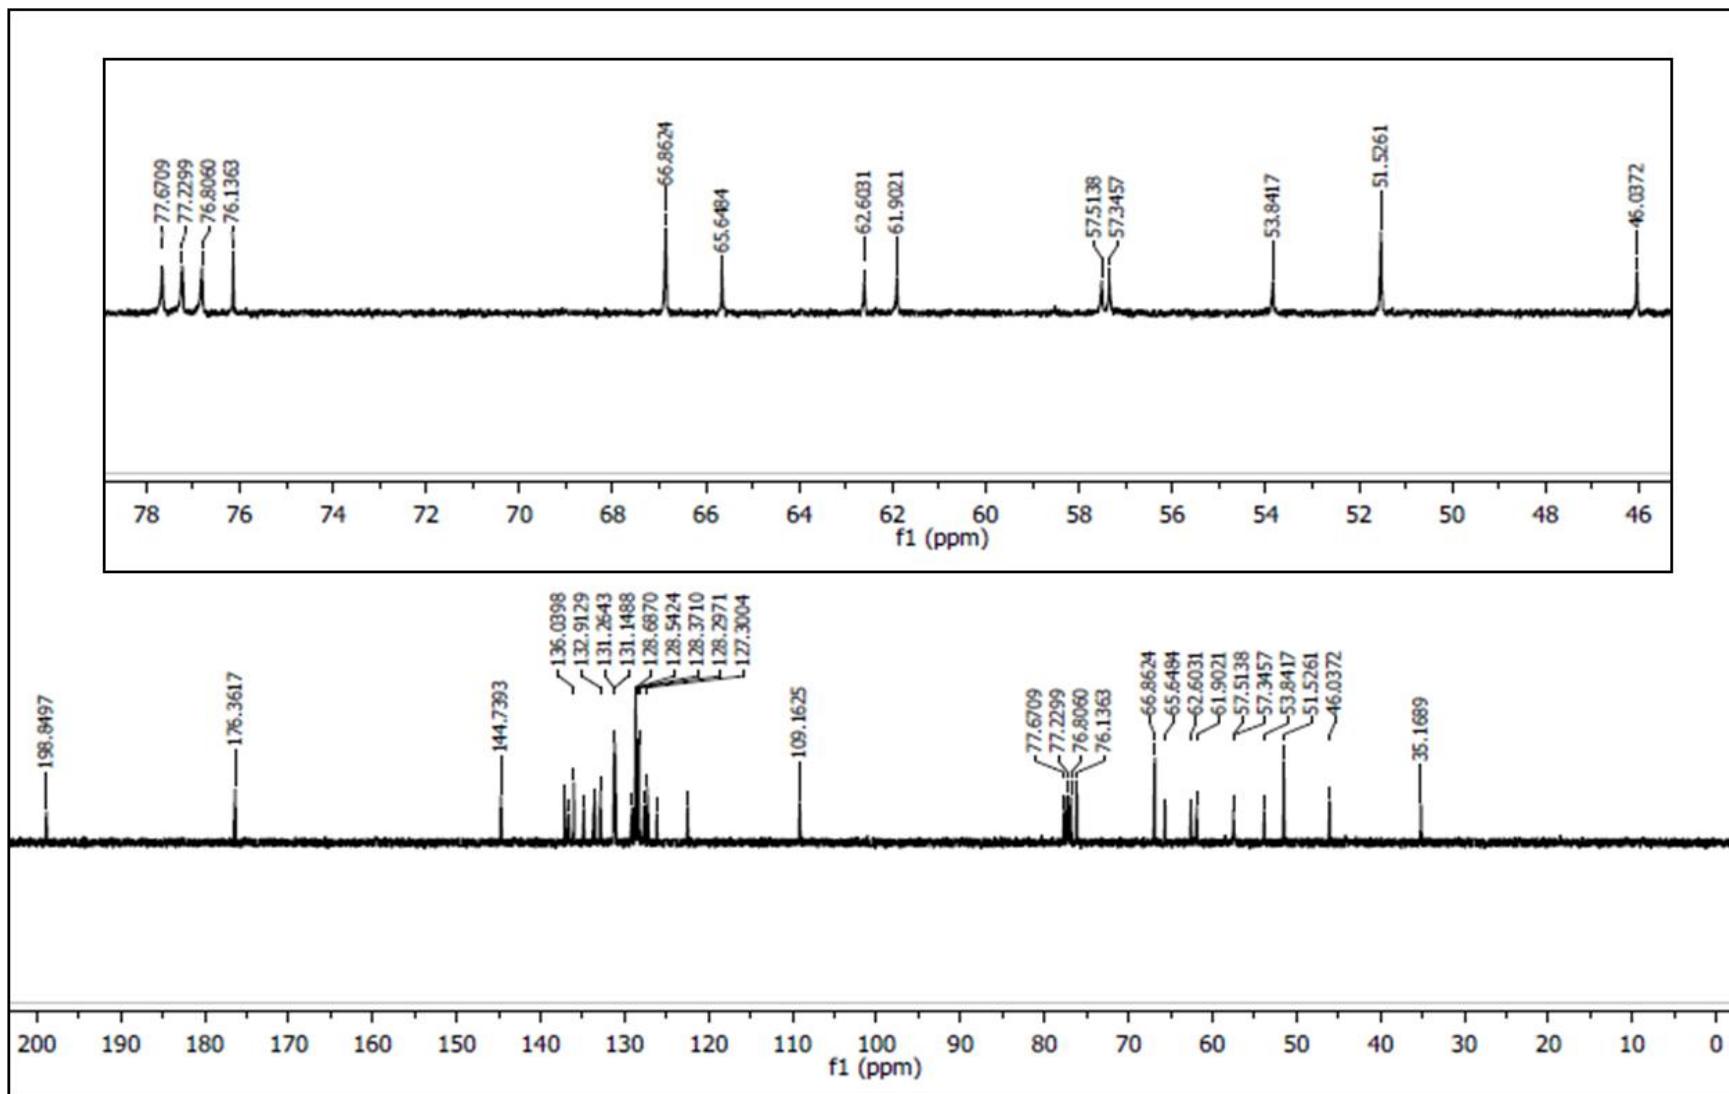

Figure S42.  $^{13}\text{C}$ -NMR spectrum of compound **41** in  $\text{CDCl}_3$ .

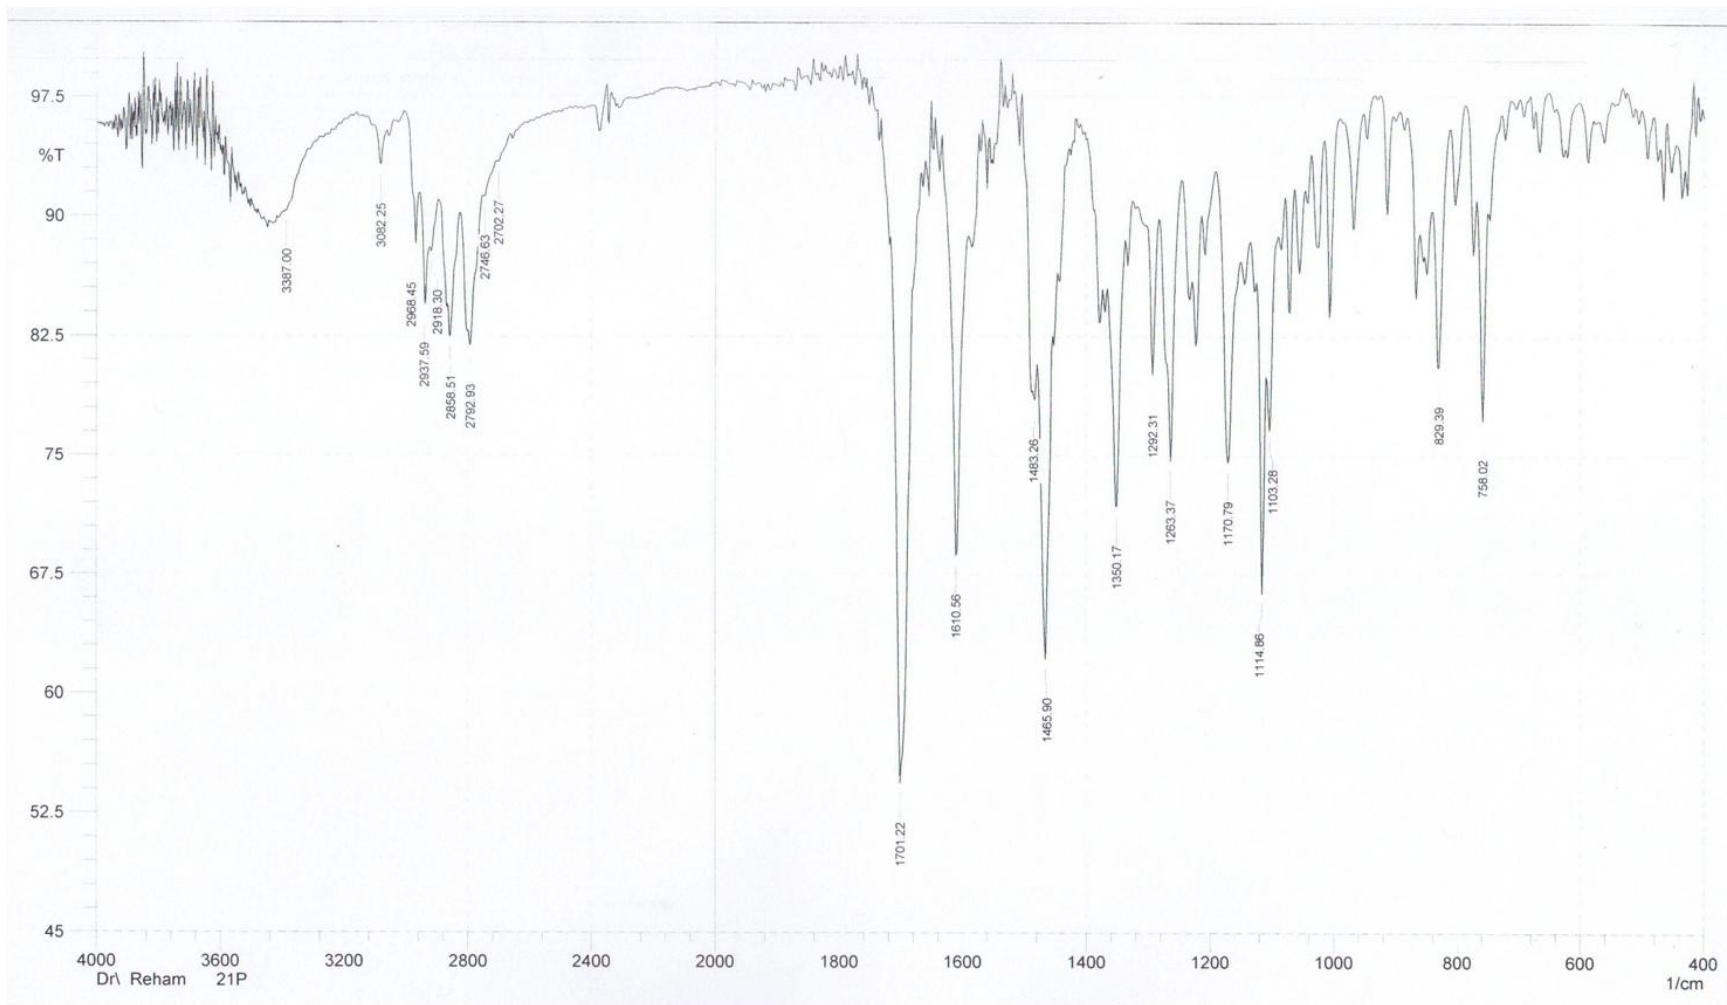

**Figure S43.** IR spectrum of compound **42** (KBr pellet).

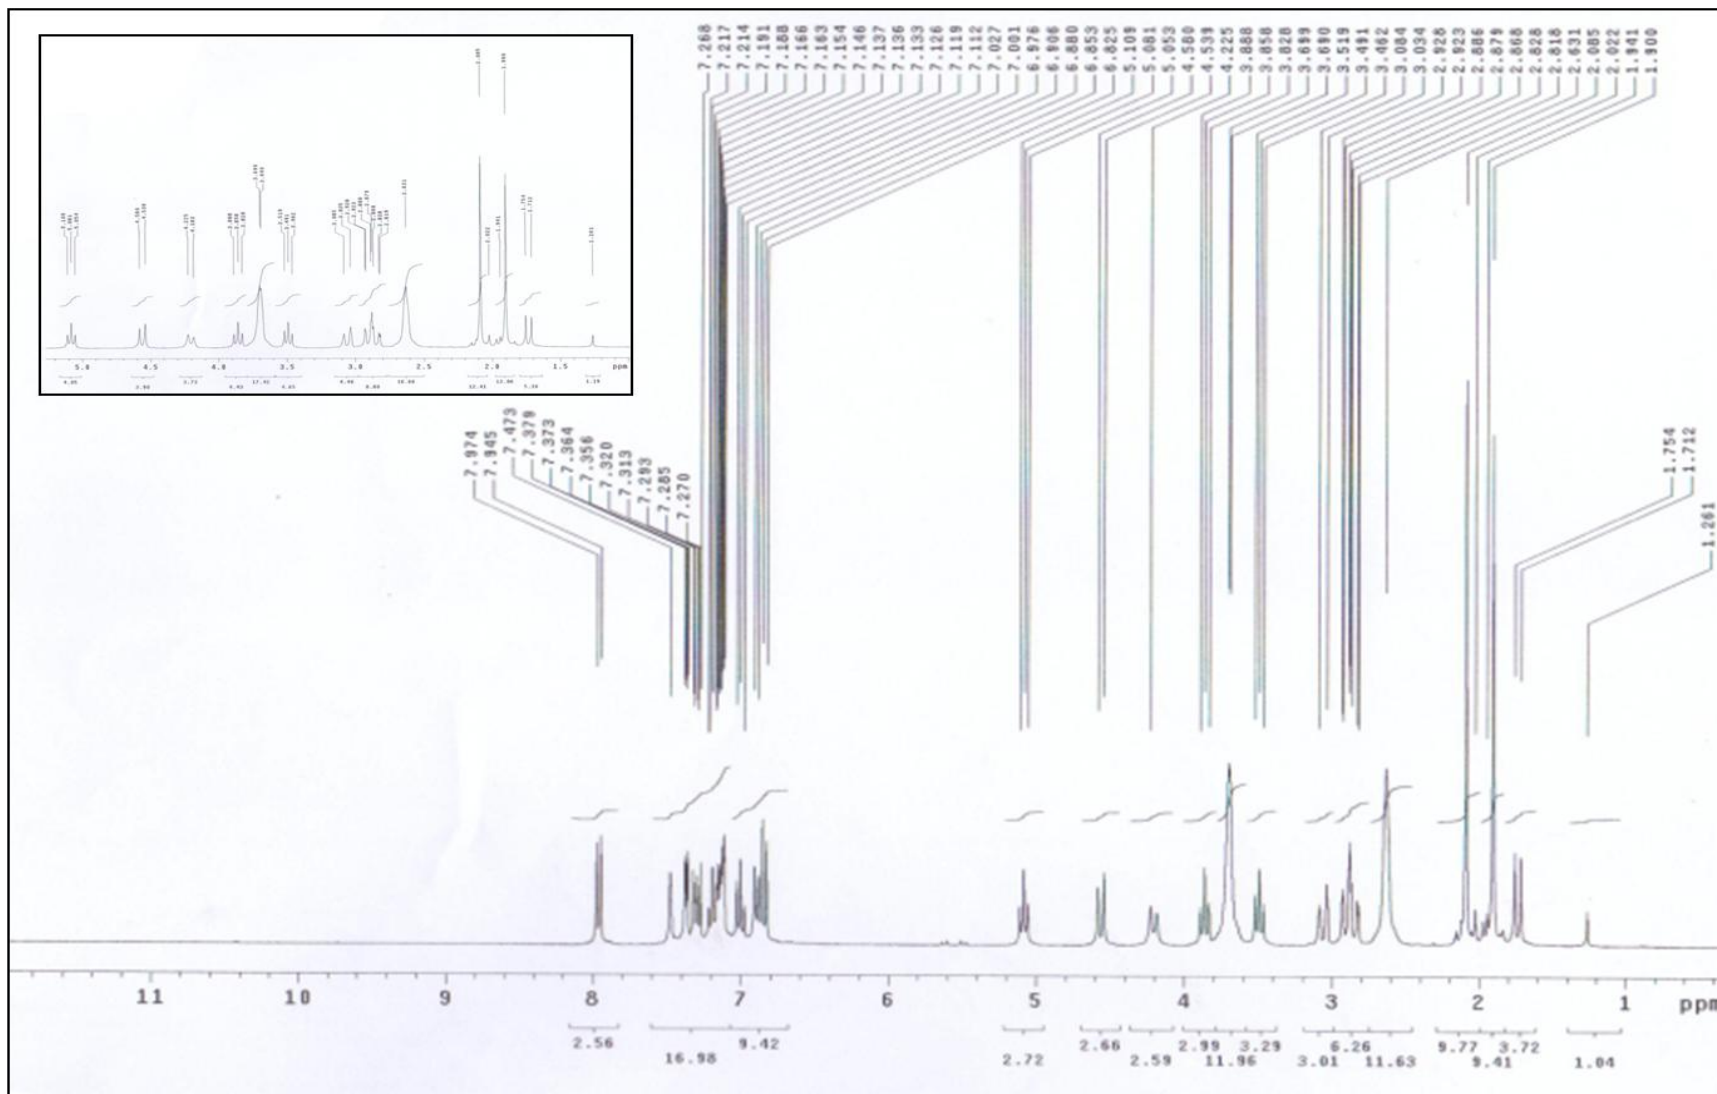

**Figure S44.**  $^1\text{H-NMR}$  spectrum of compound **42** in  $\text{CDCl}_3$ .

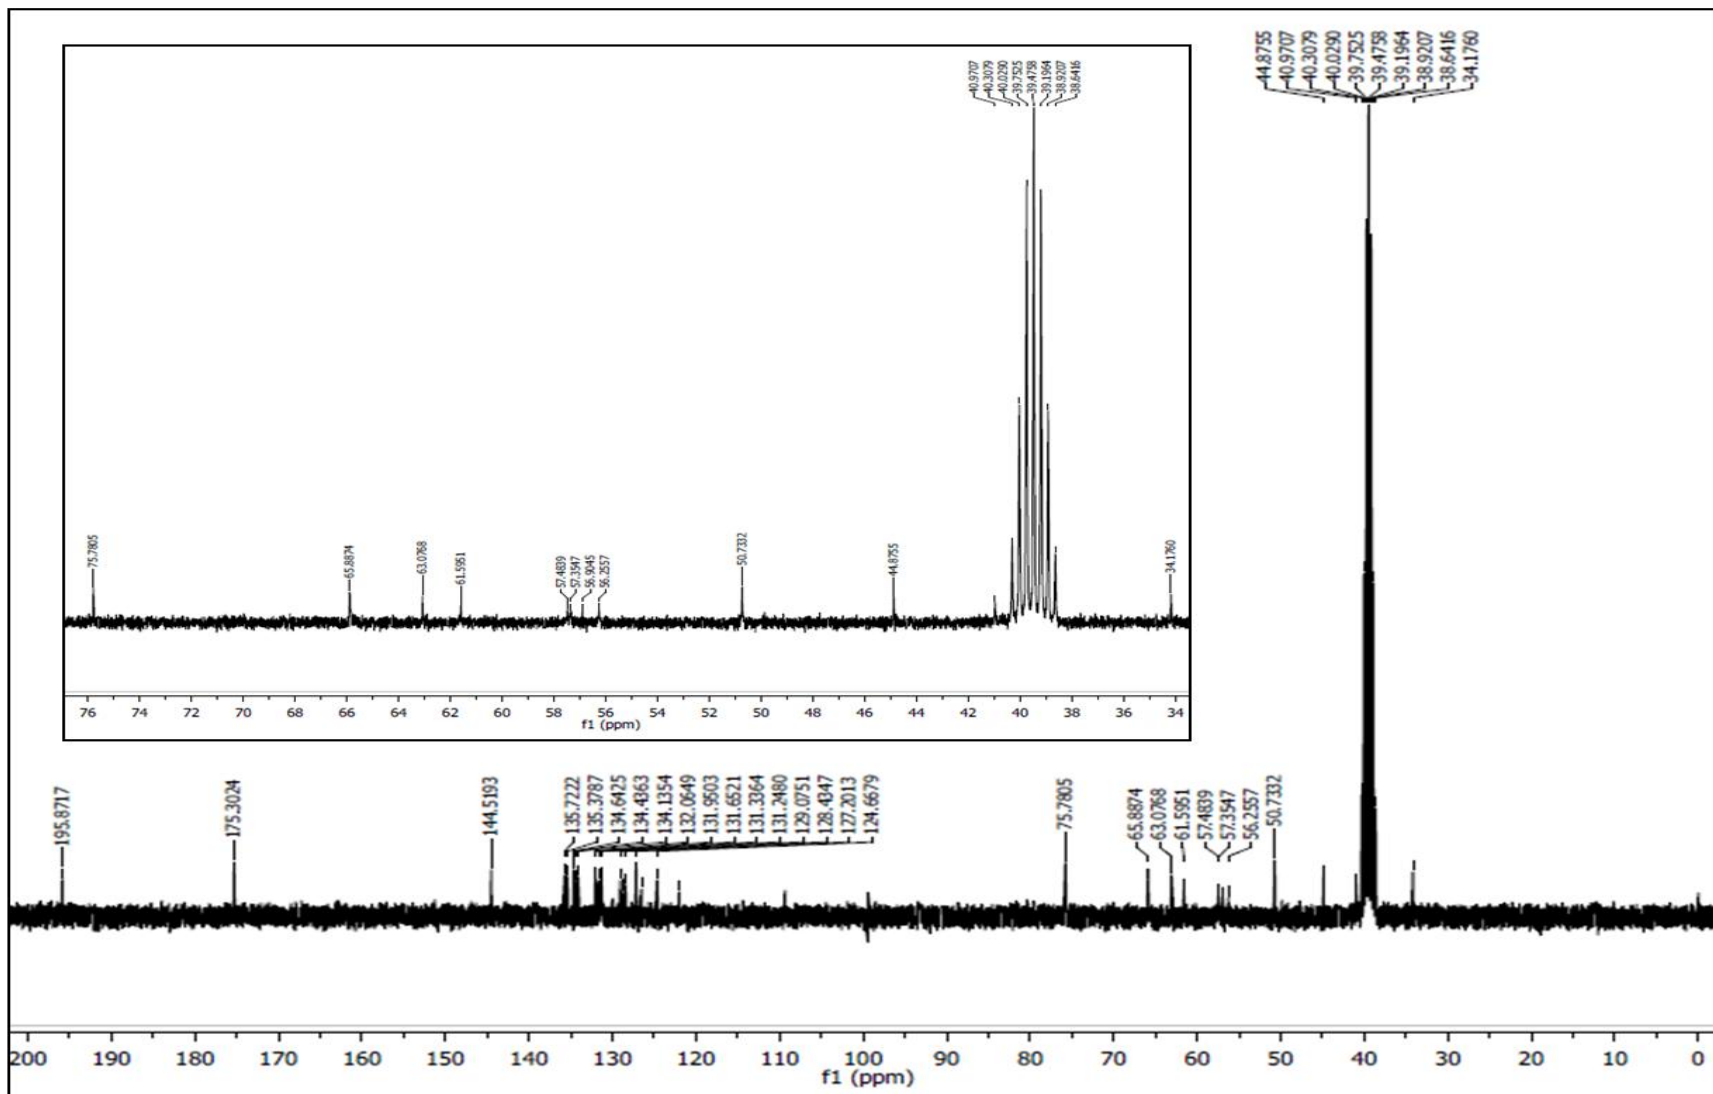

Figure S45.  $^{13}\text{C}$ -NMR spectrum of compound **42** in  $\text{DMSO-}d_6$ .

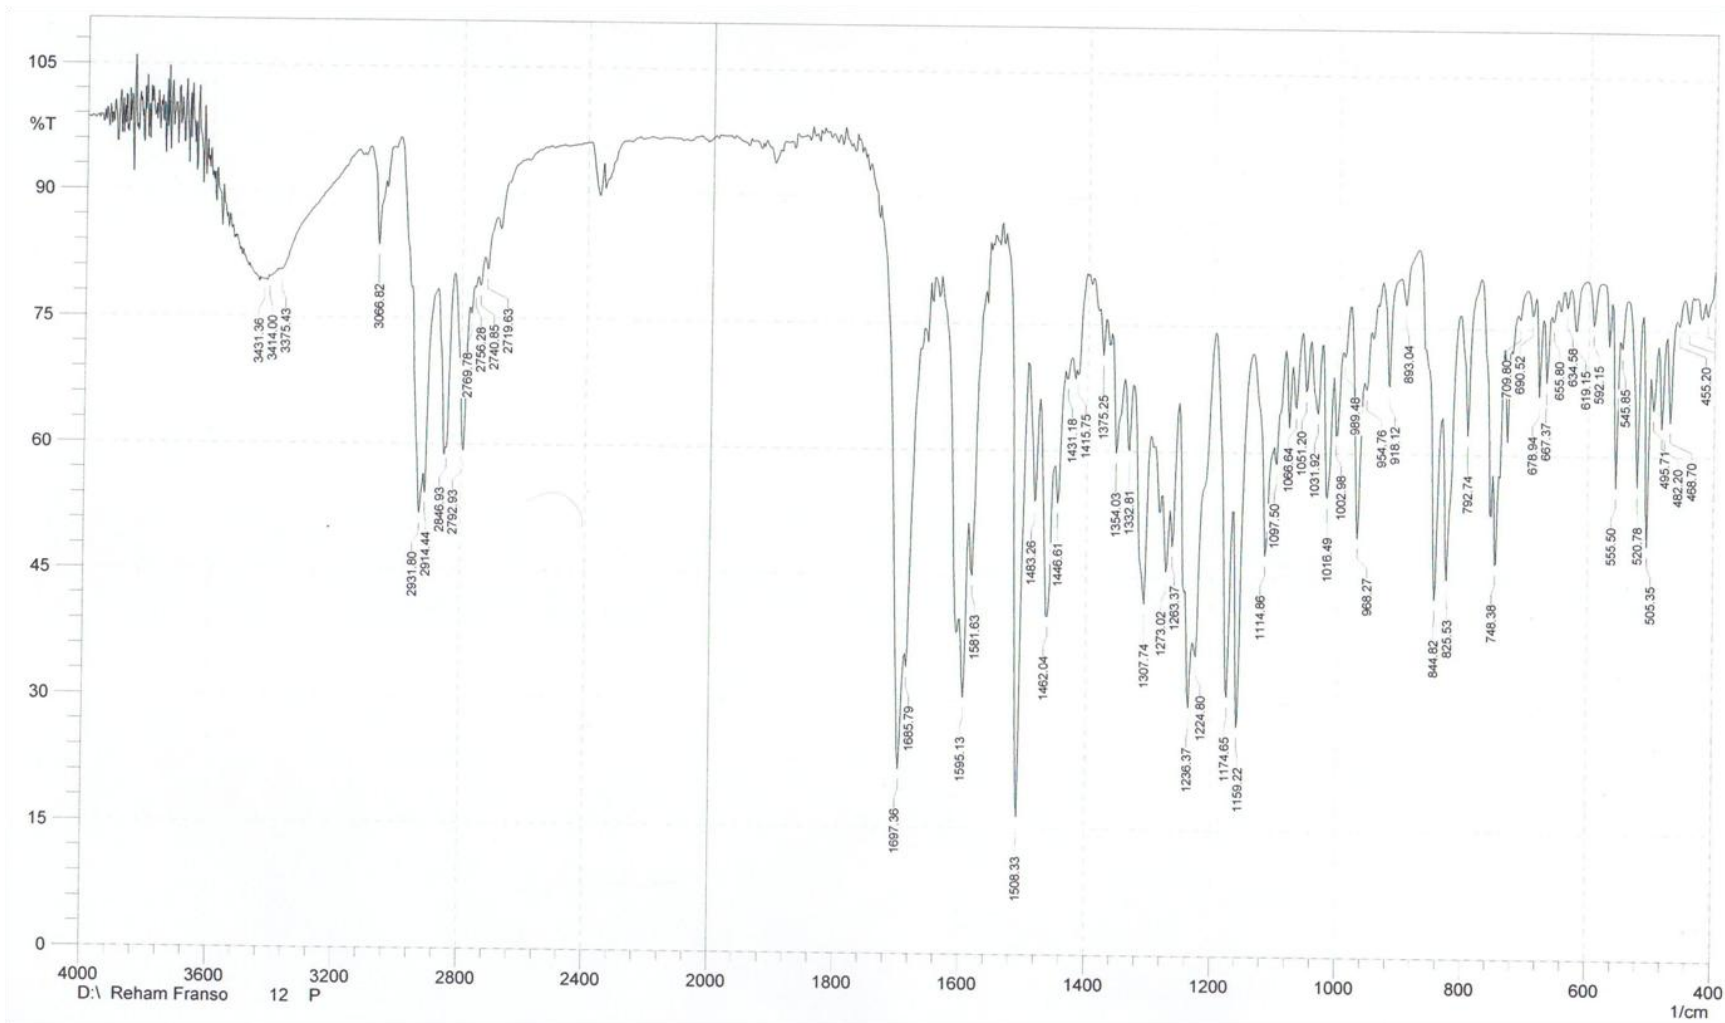

Figure S46. IR spectrum of compound 43 (KBr pellet).

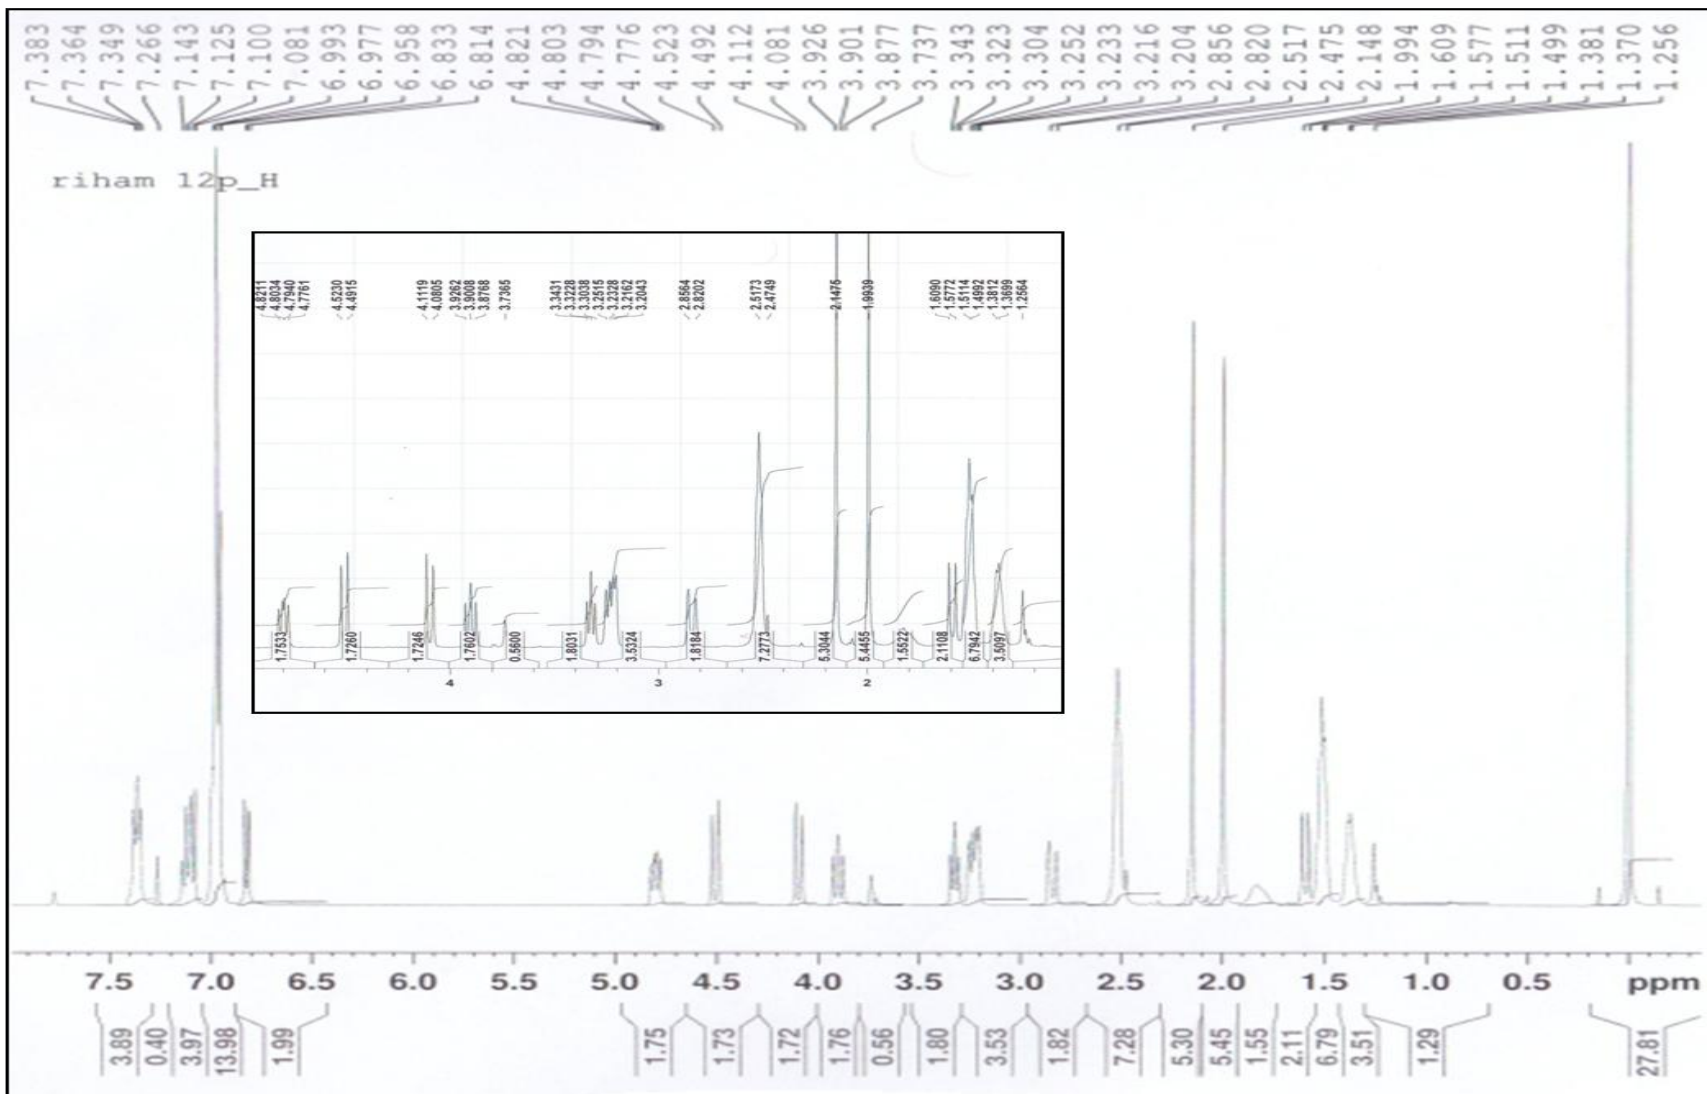

Figure S47.  $^1\text{H}$ -NMR spectrum of compound **43** in  $\text{CDCl}_3$ .



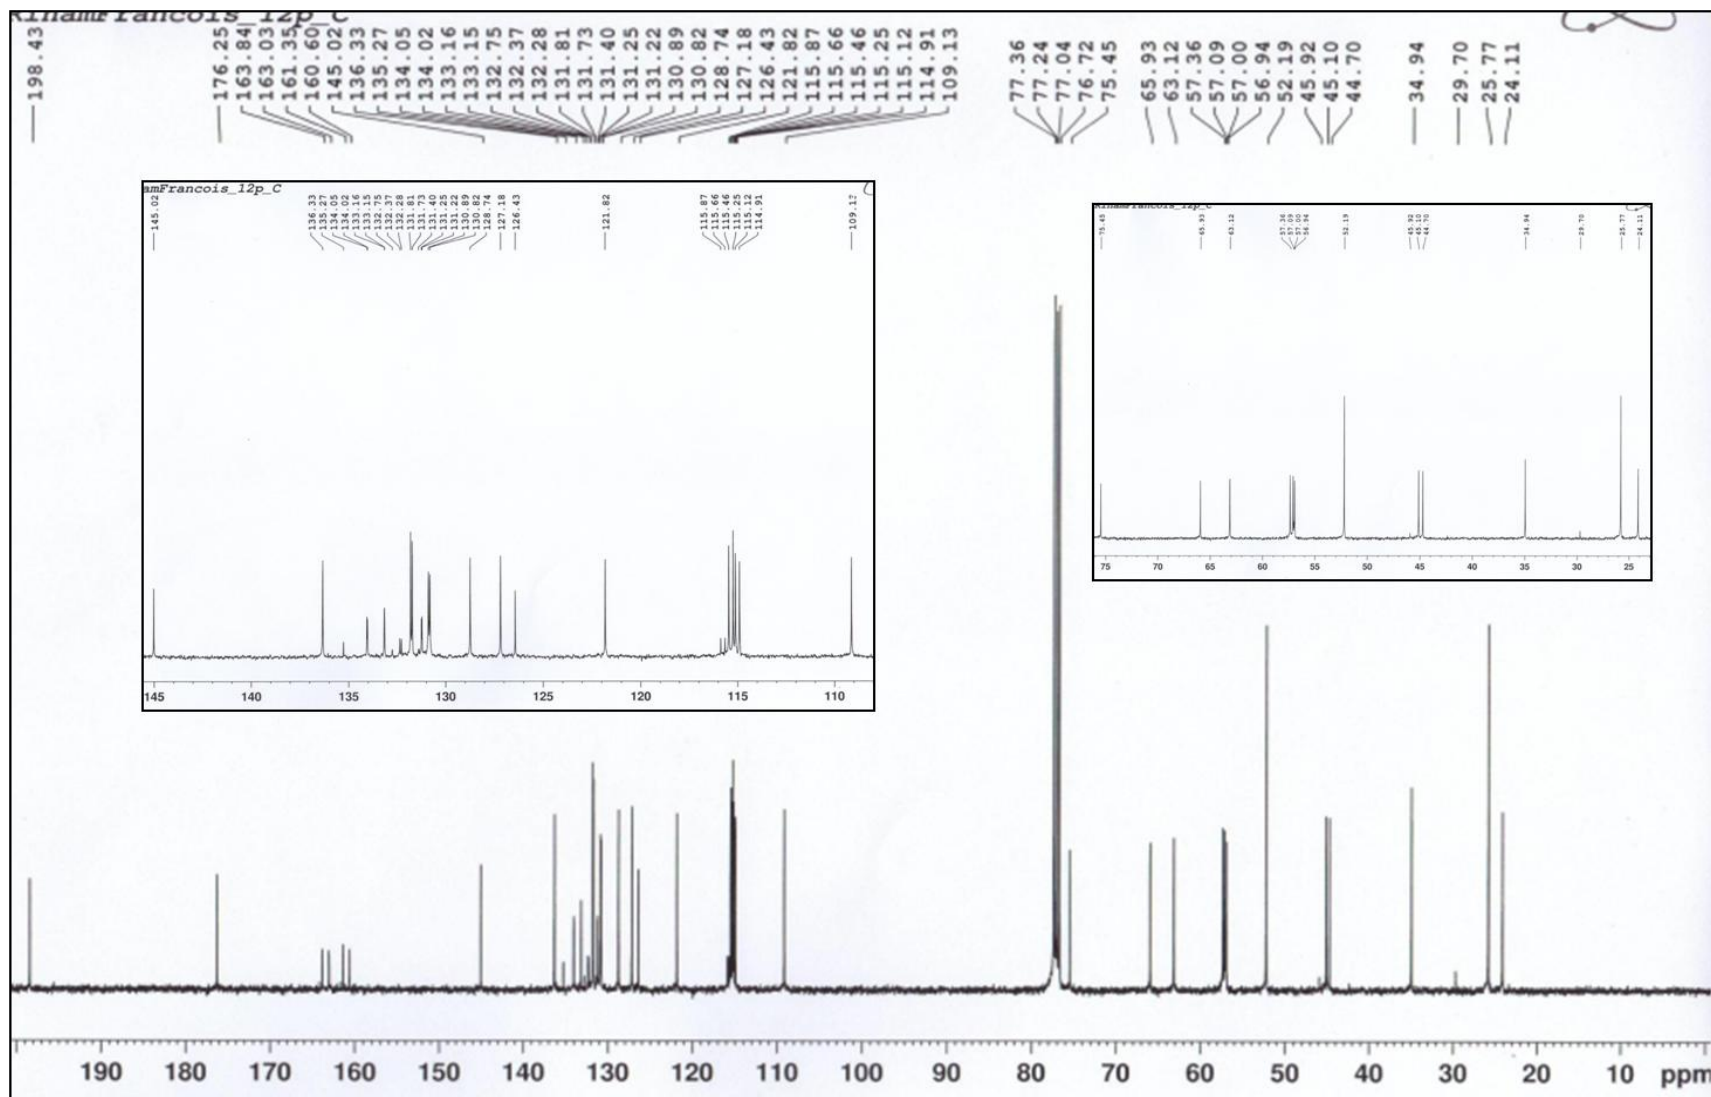

**Figure S48.**  $^{13}\text{C}$ -NMR spectrum of compound **43** in  $\text{CDCl}_3$ .

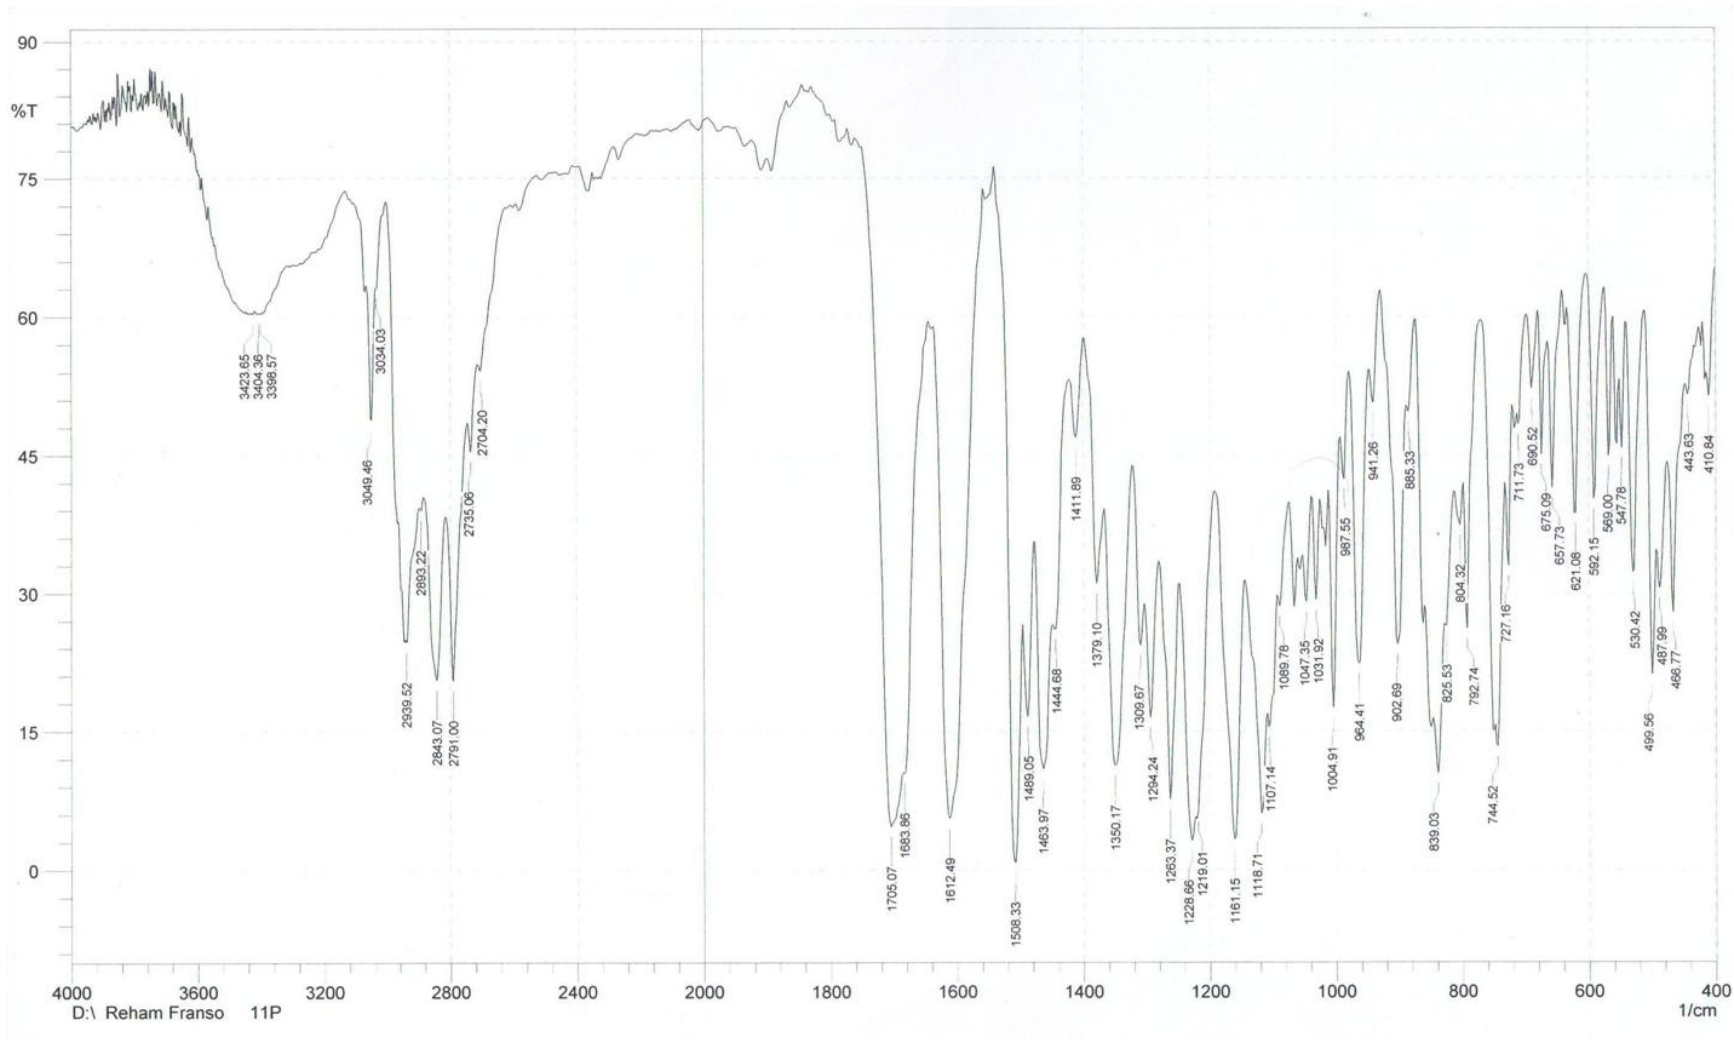

**Figure S49.** IR spectrum of compound **44** (KBr pellet).

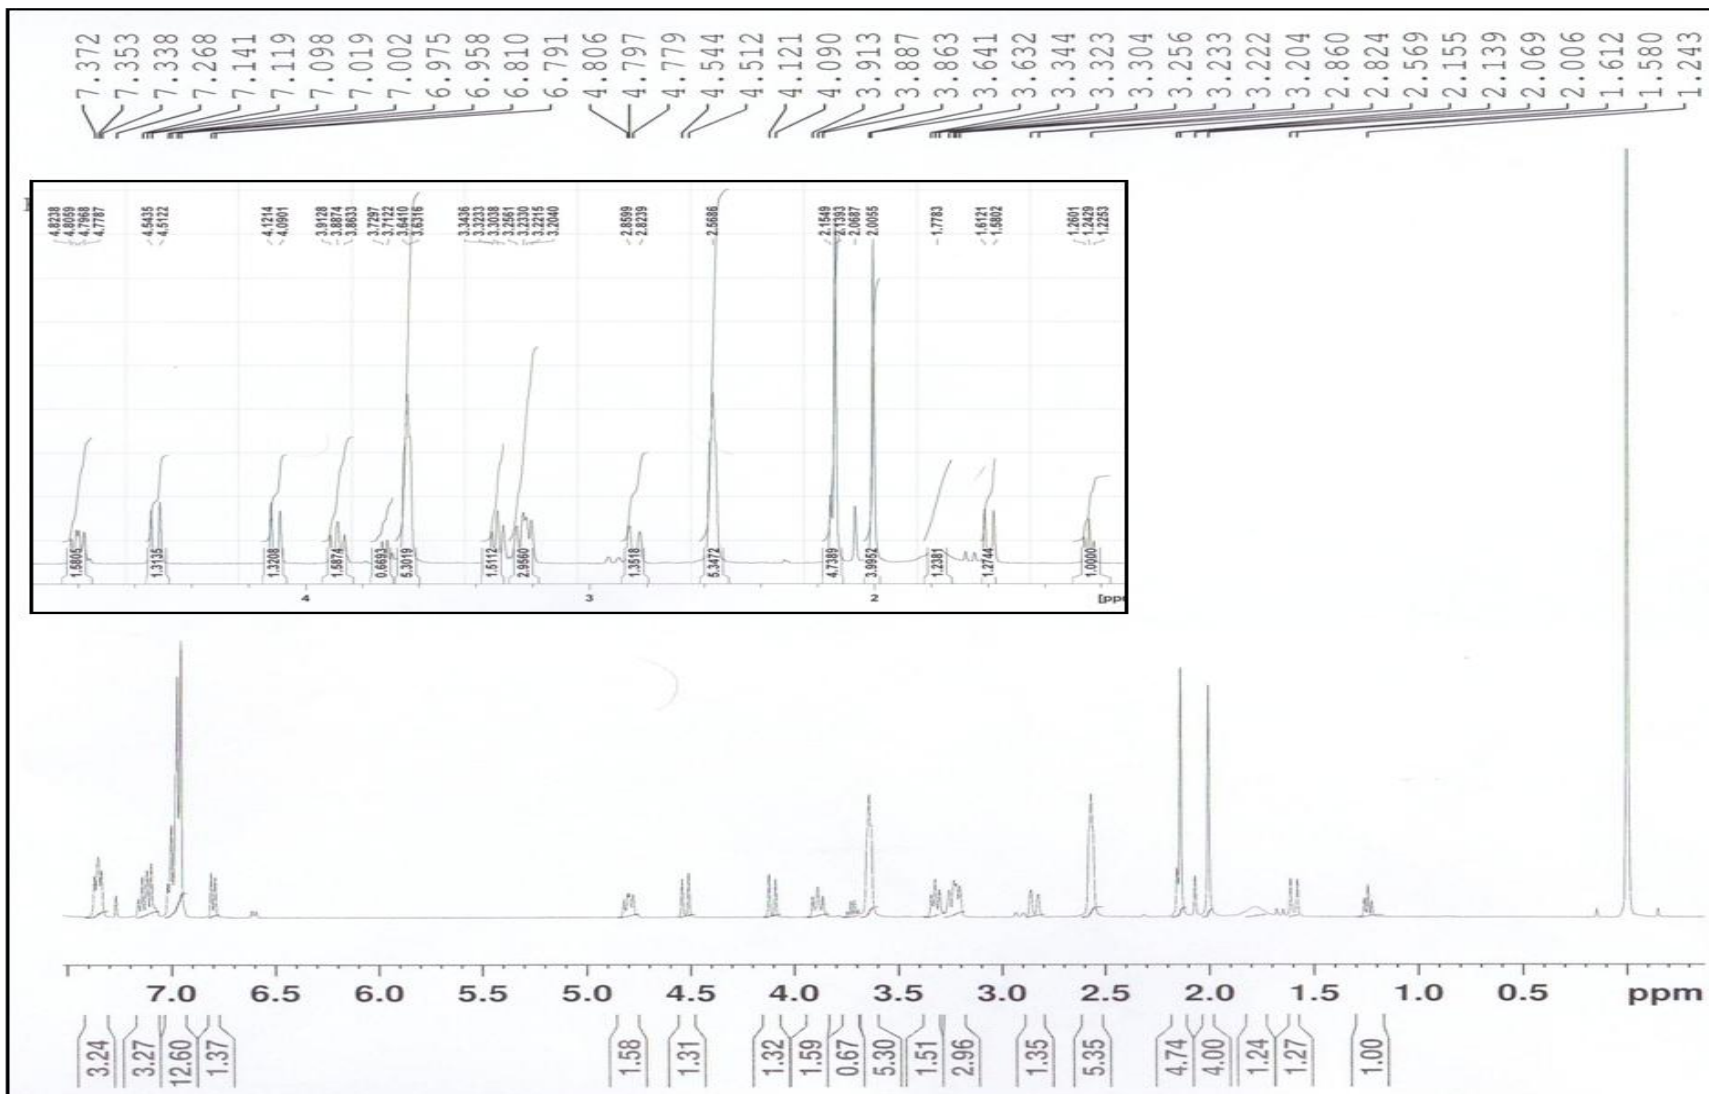

Figure S50. <sup>1</sup>H-NMR spectrum of compound 44 in CDCl<sub>3</sub>.

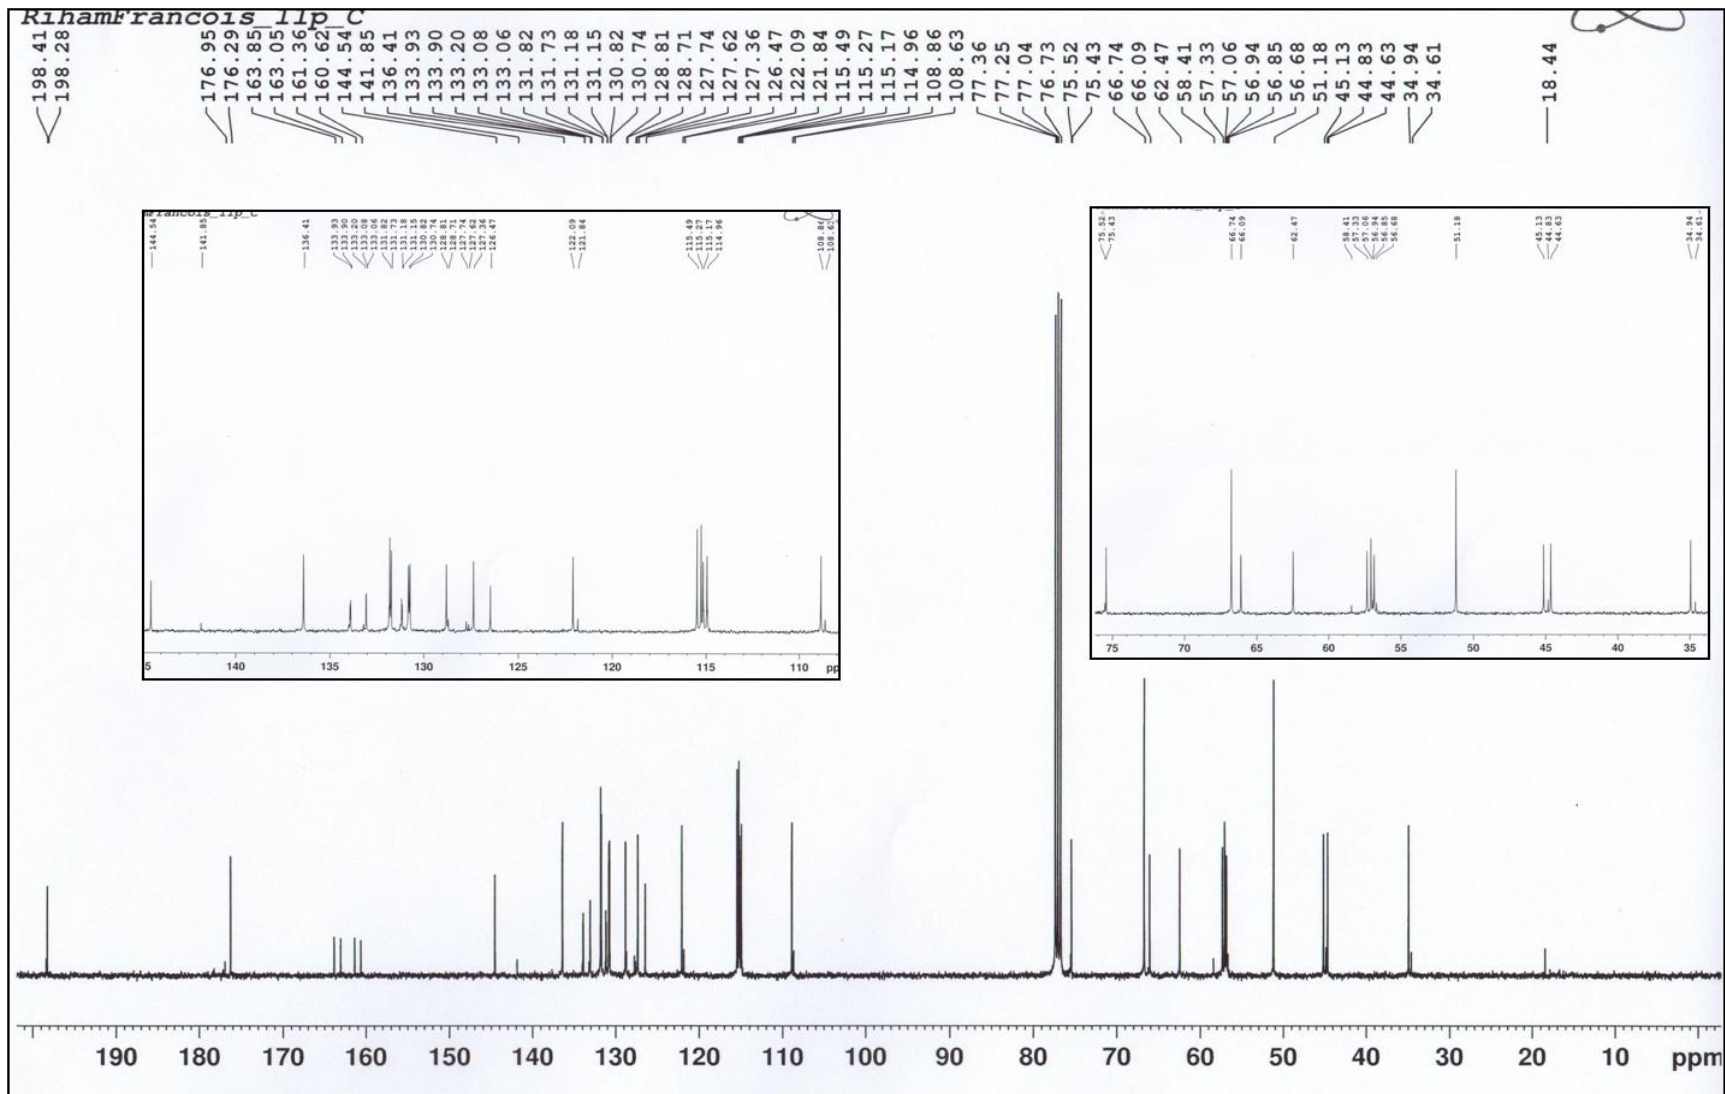

Figure S51.  $^{13}\text{C}$ -NMR spectrum of compound **44** in  $\text{CDCl}_3$ .

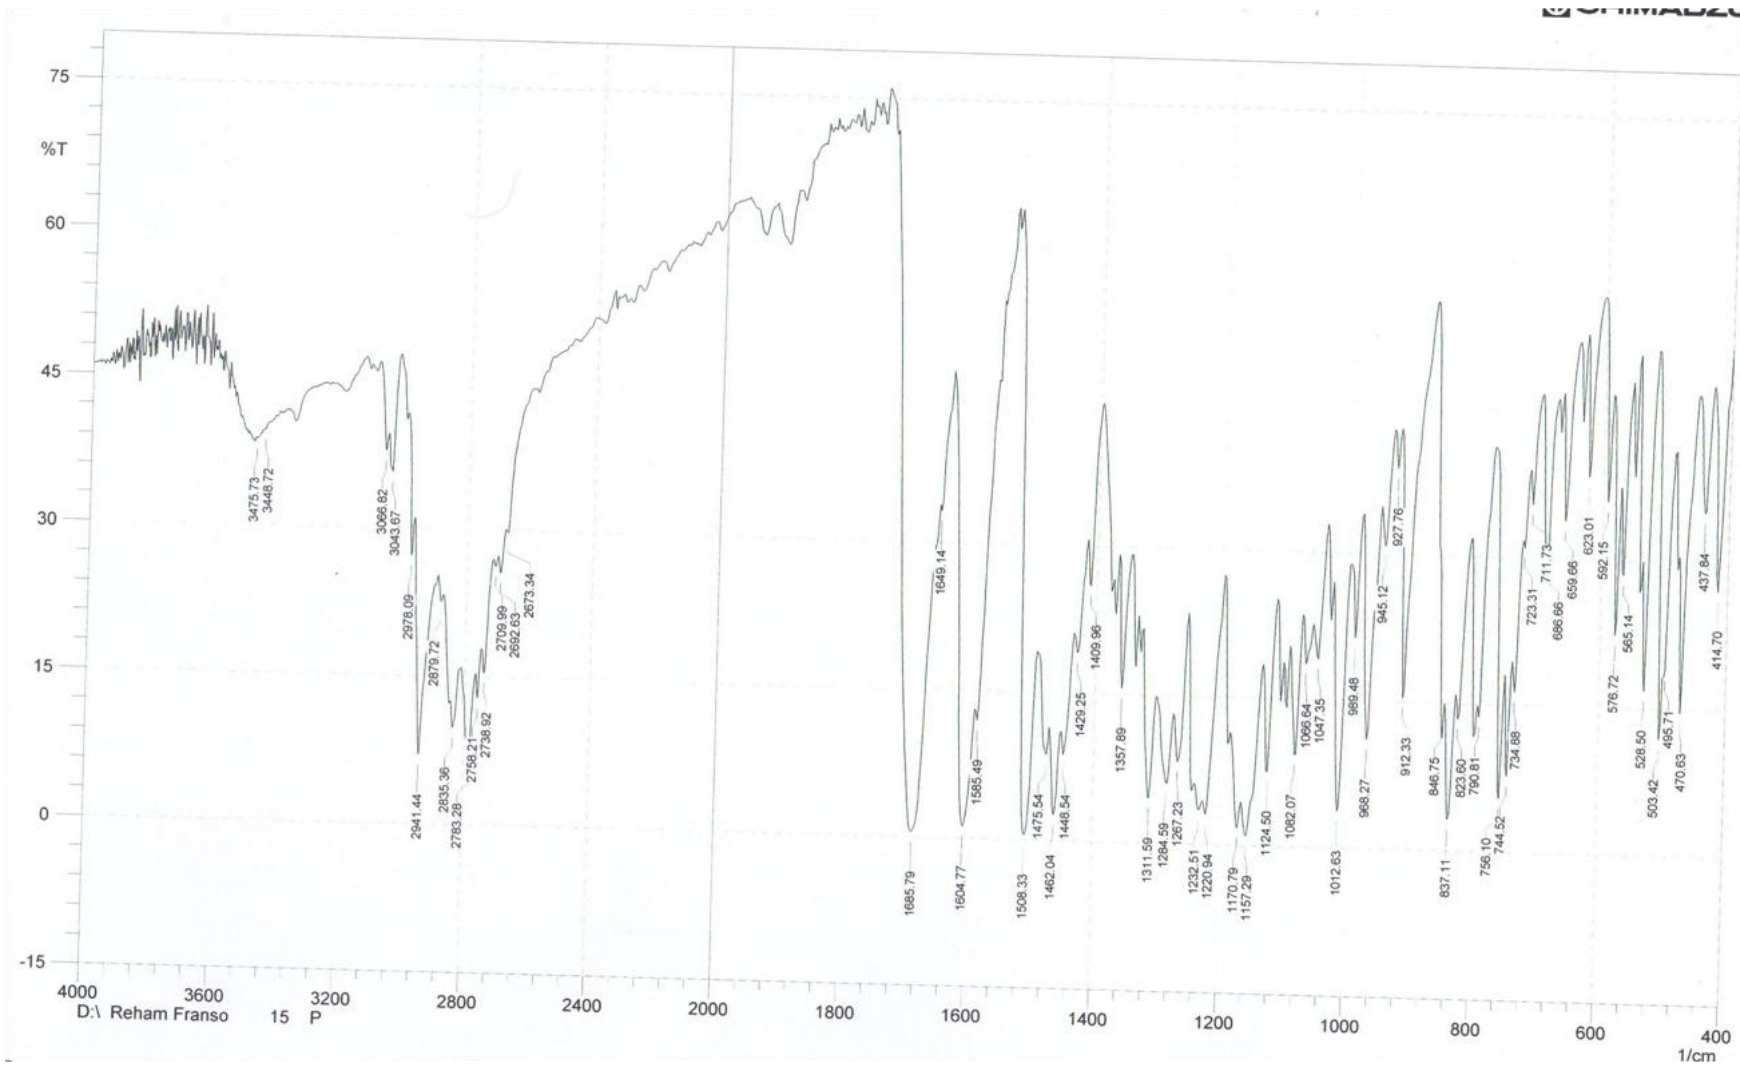

Figure S52. IR spectrum of compound 45 (KBr pellet).

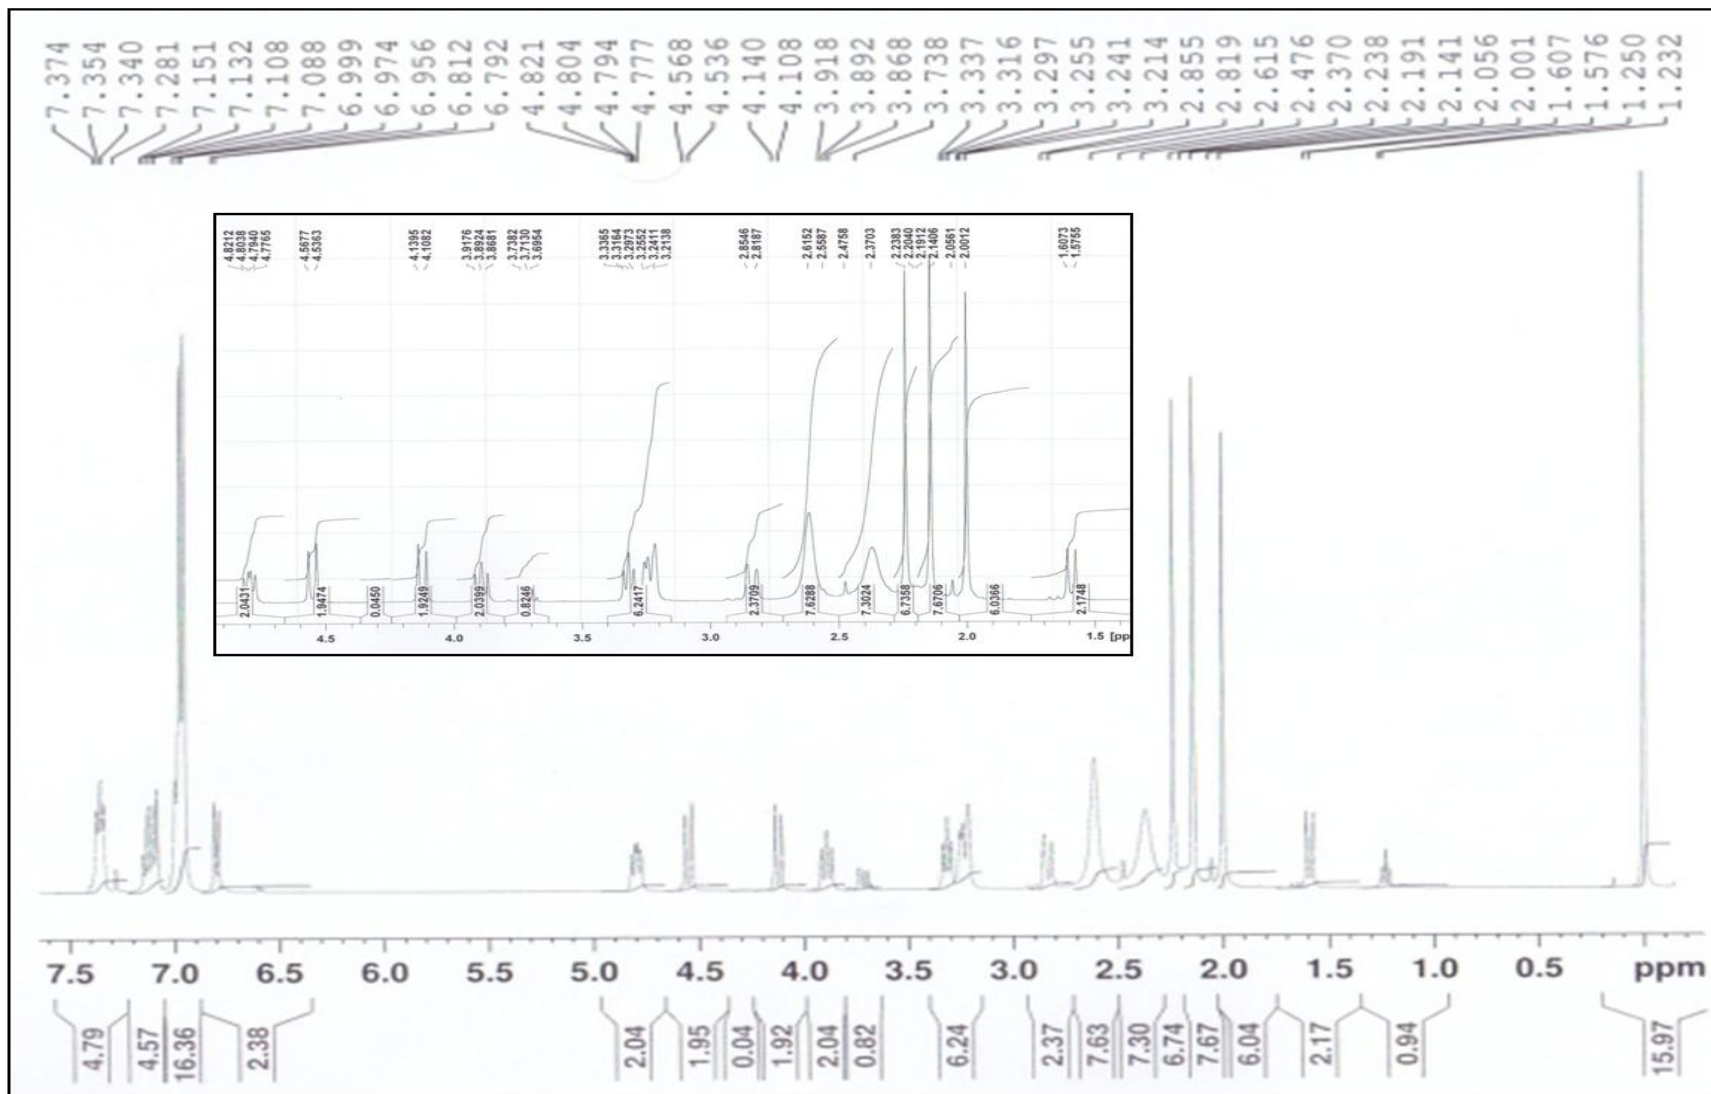

Figure S53.  $^1\text{H-NMR}$  spectrum of compound **45** in  $\text{CDCl}_3$ .



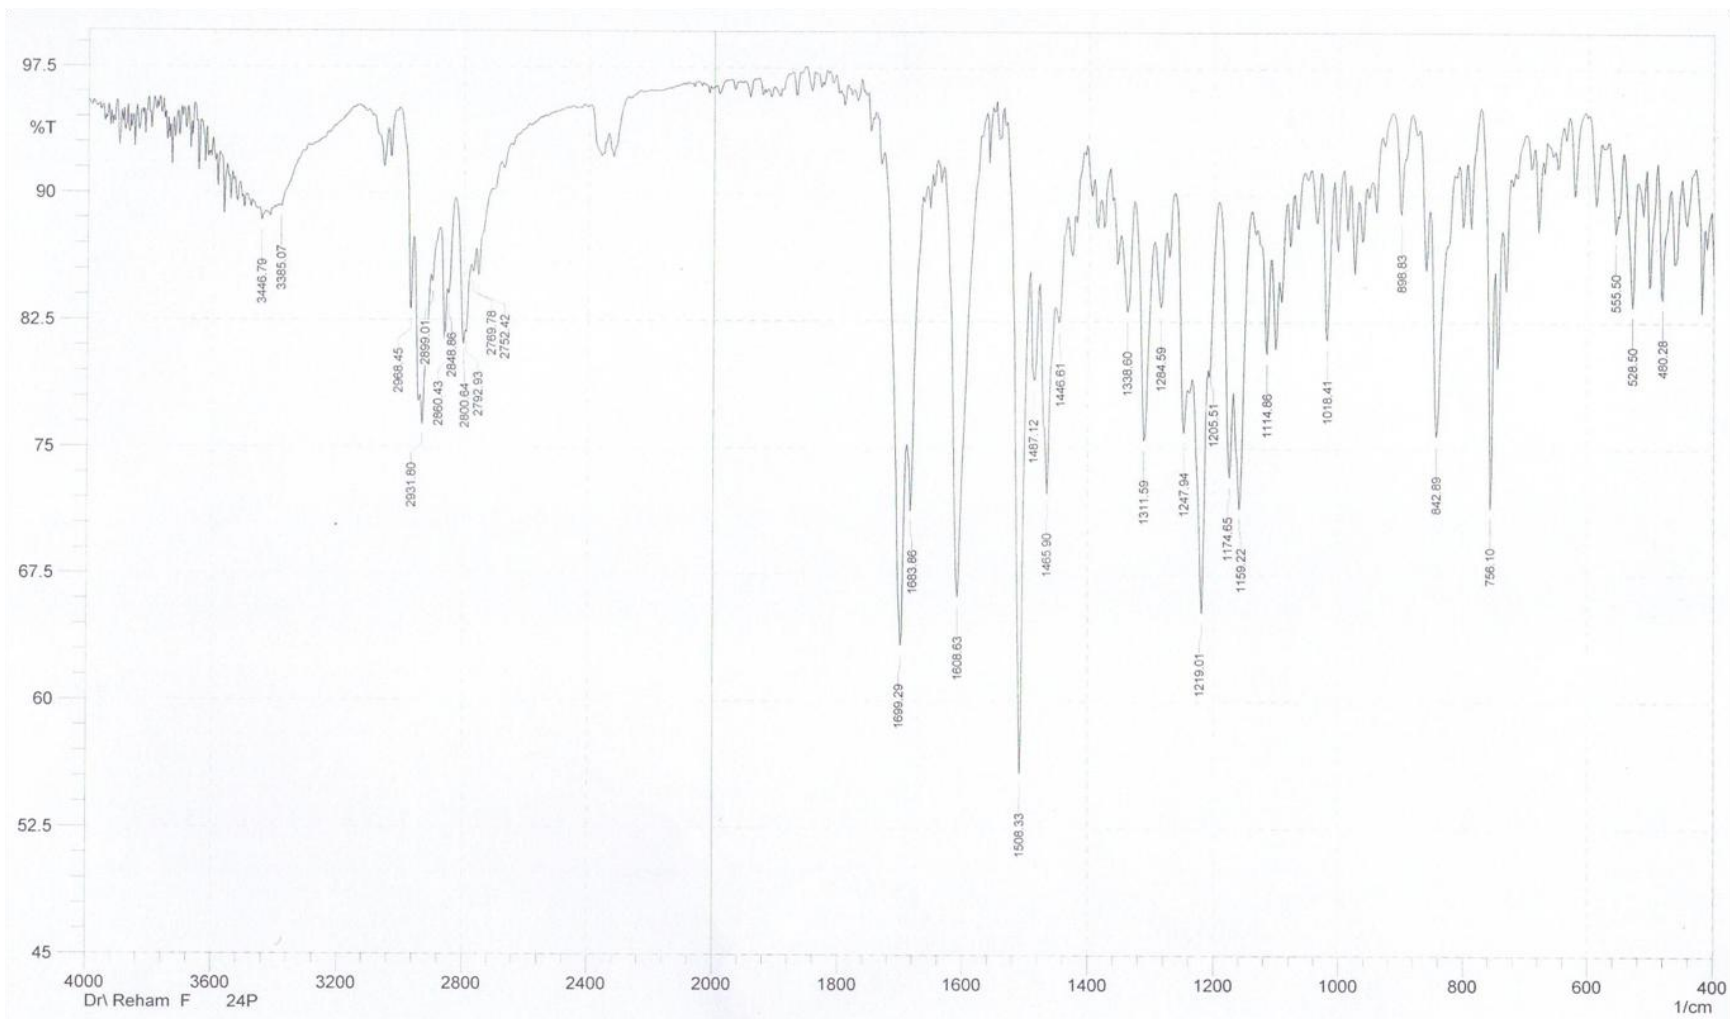

**Figure S55.** IR spectrum of compound **46** (KBr pellet).



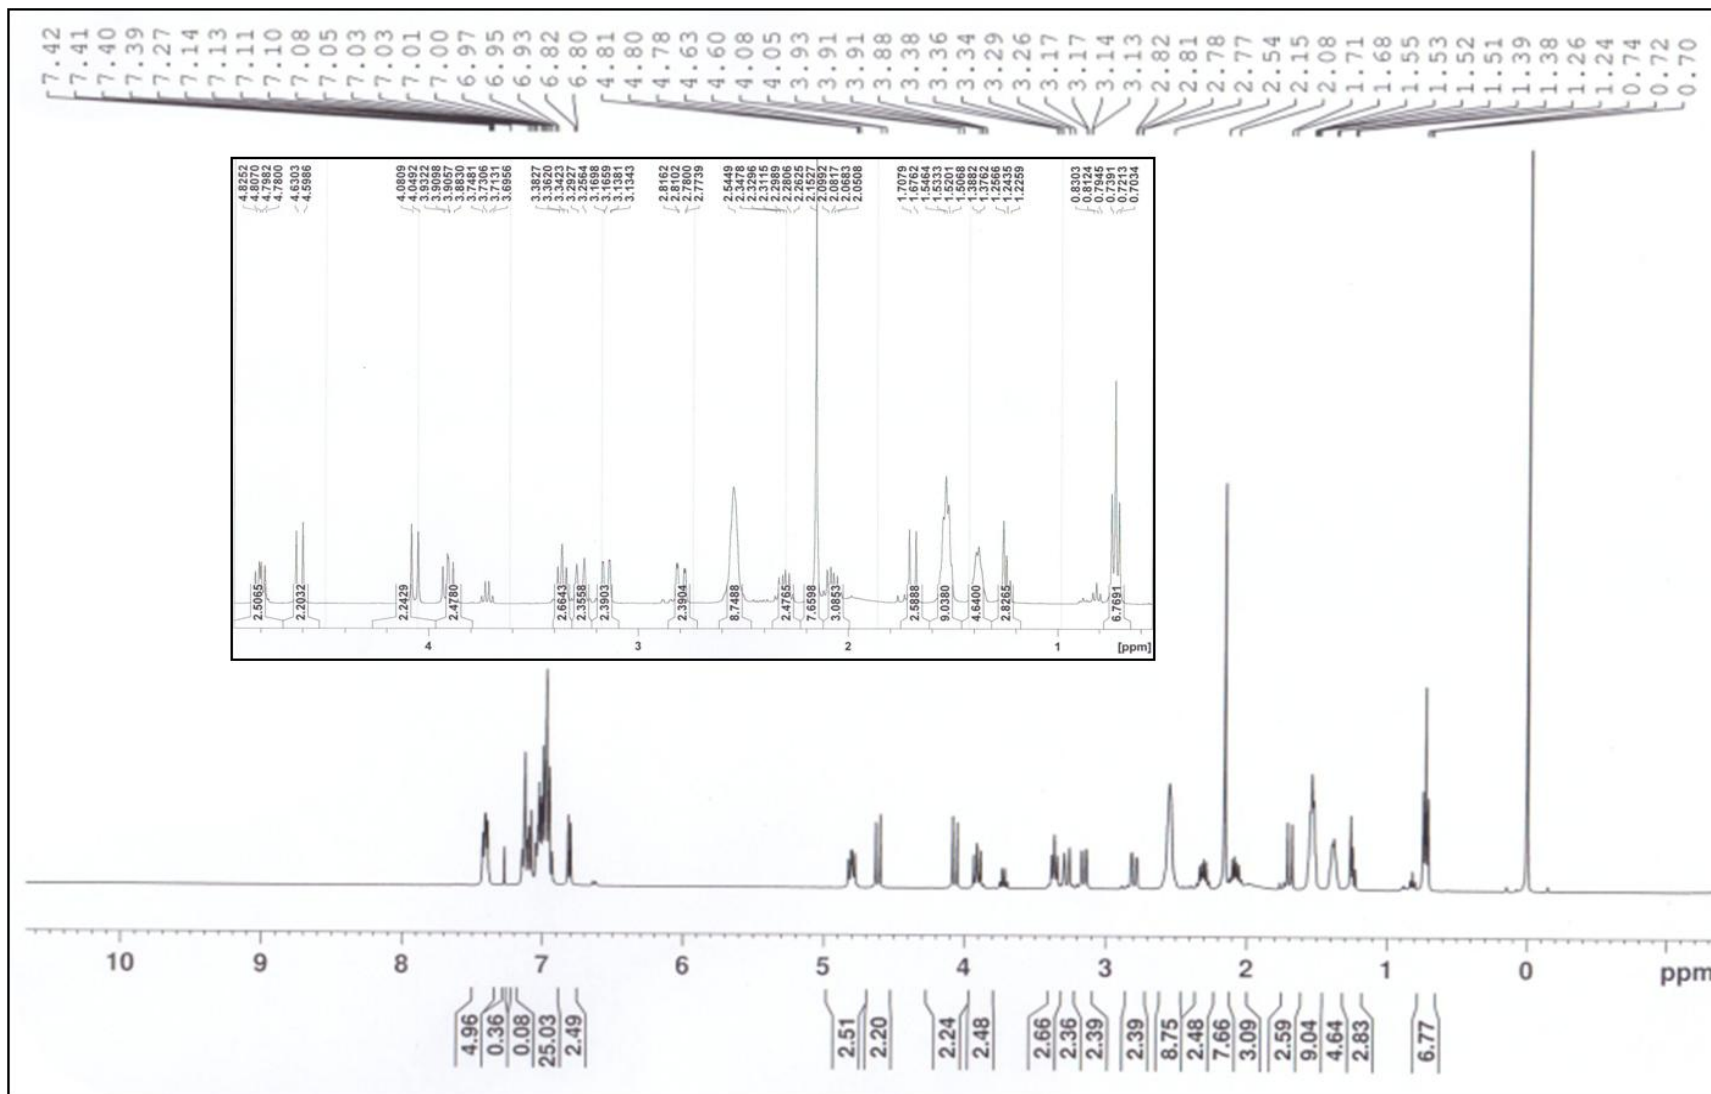

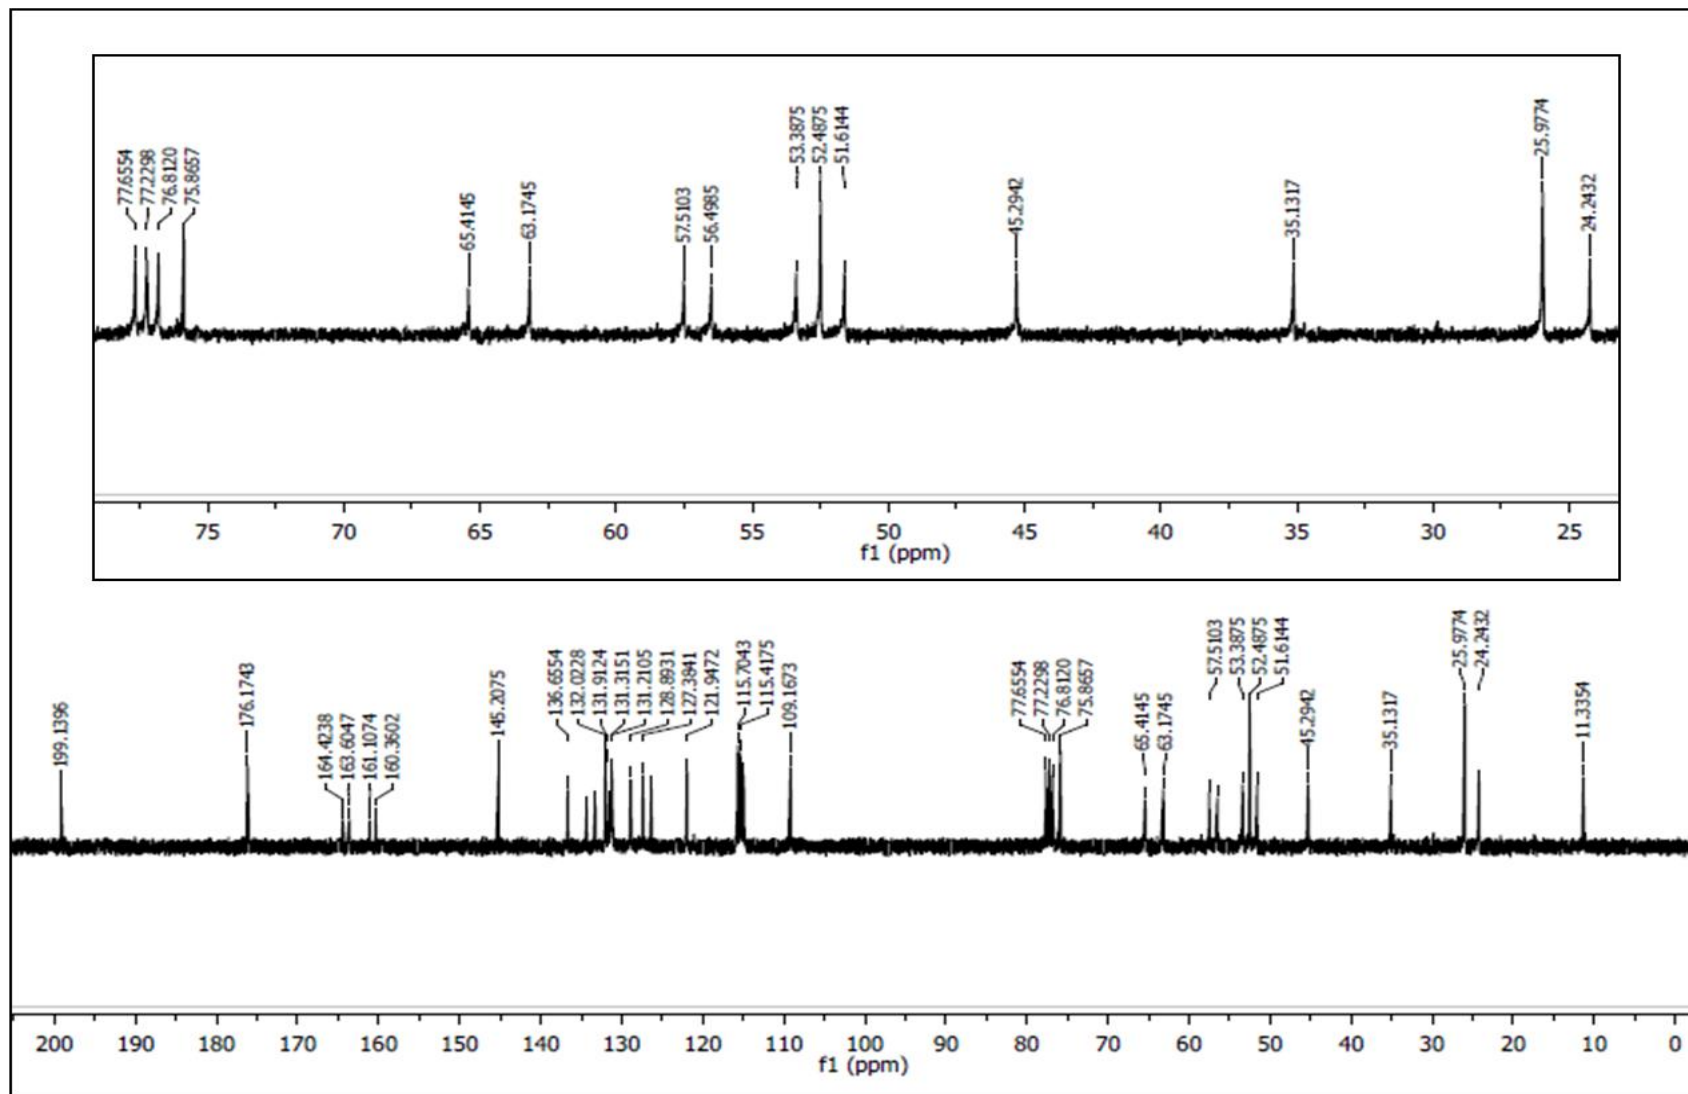

Figure S57.  $^{13}\text{C}$ -NMR spectrum of compound 46 in  $\text{CDCl}_3$ .

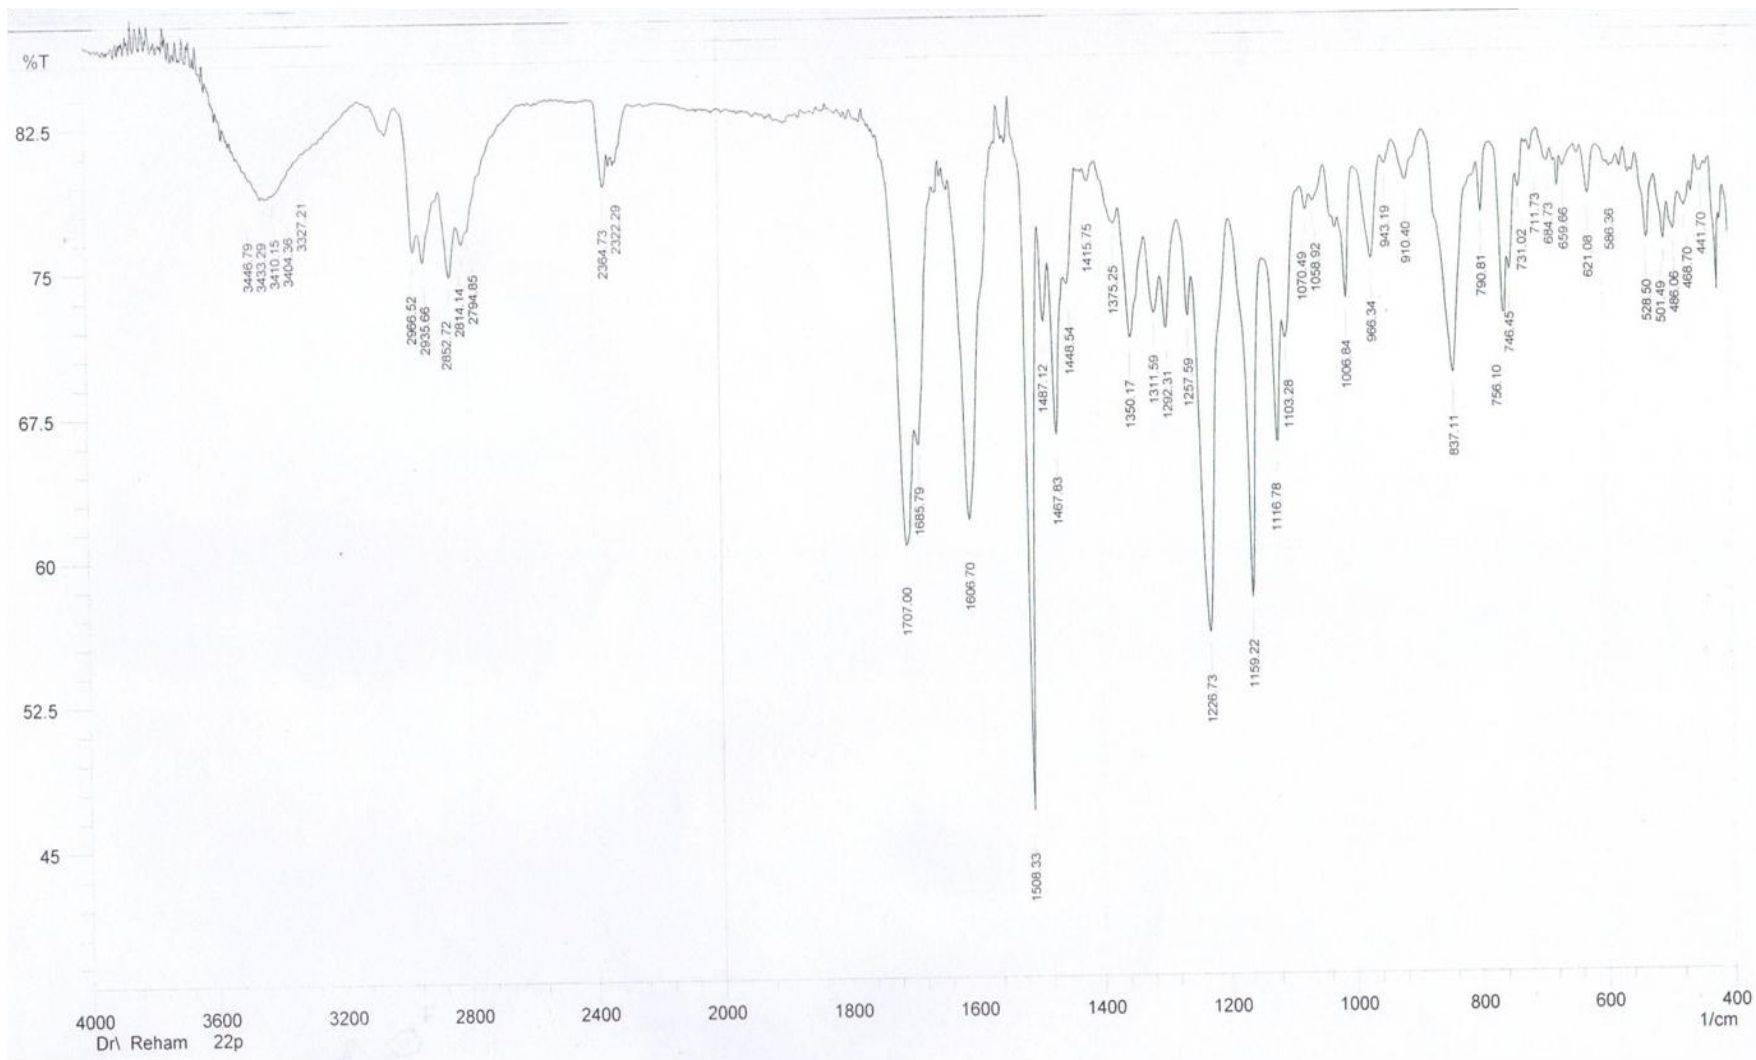

Figure S58. IR spectrum of compound 47 (KBr pellet).



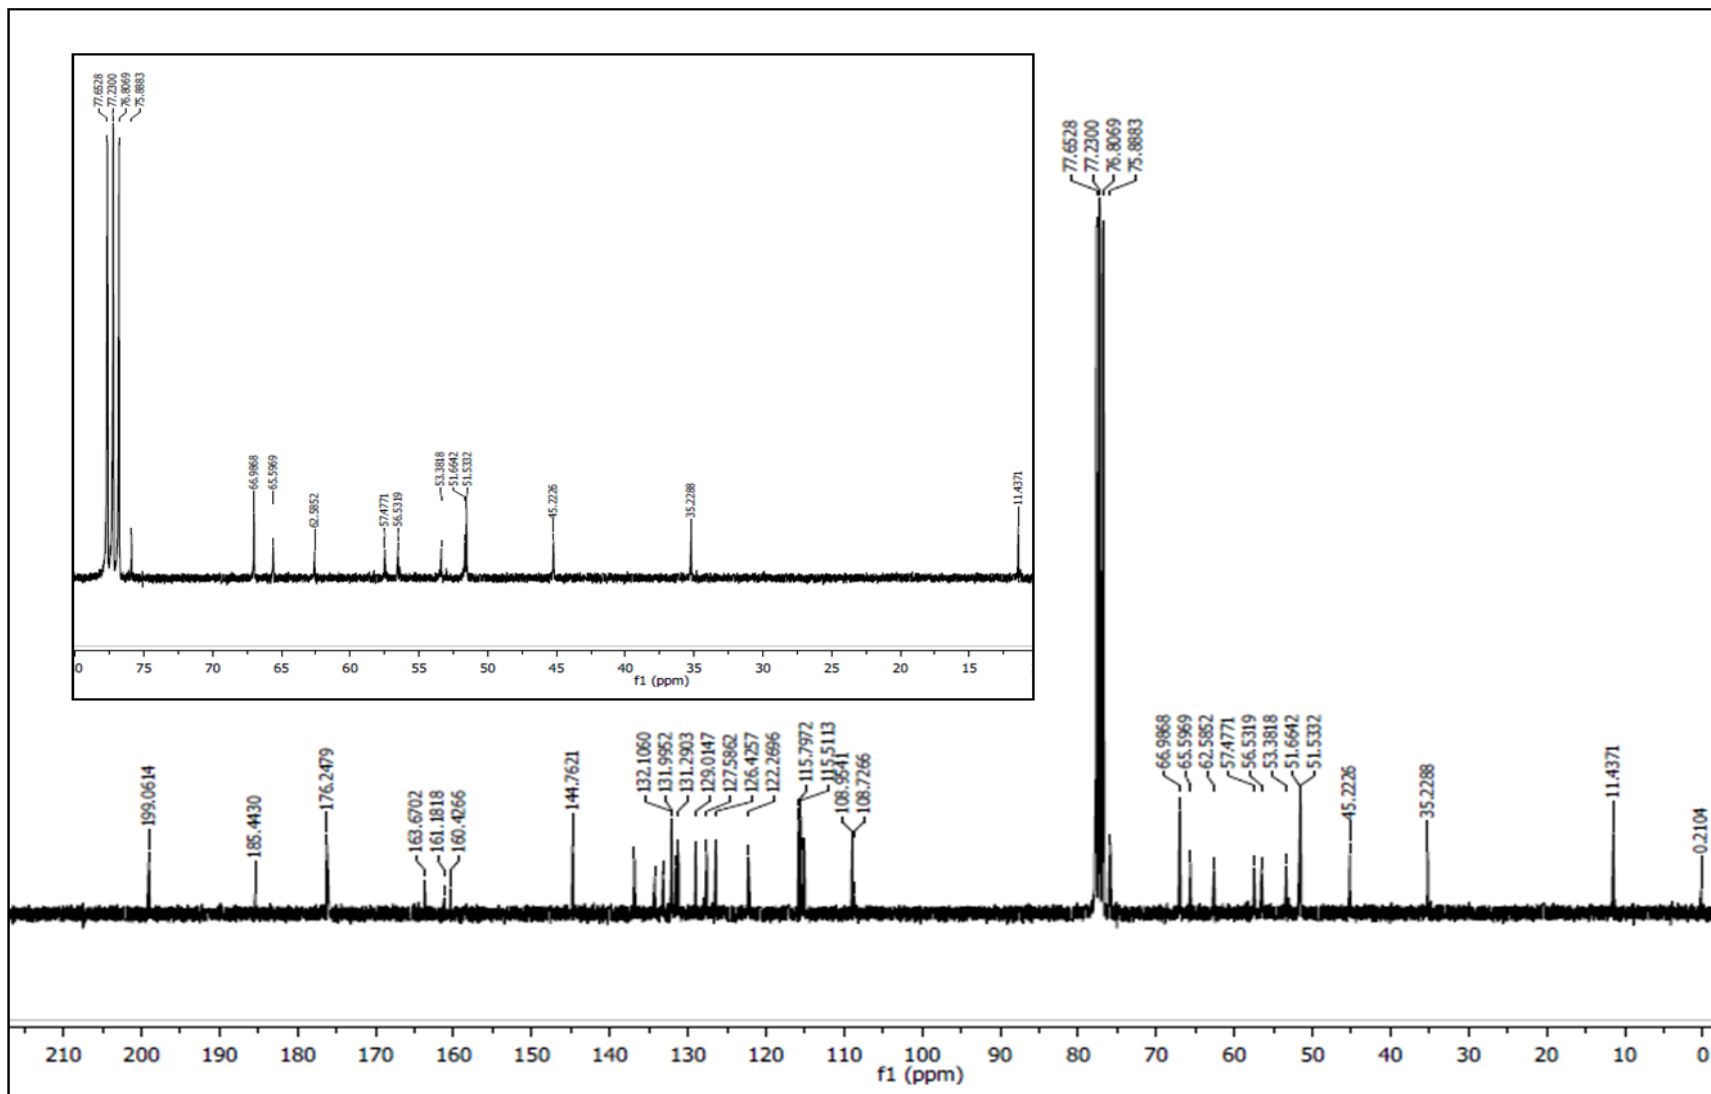

Figure S60.  $^{13}\text{C}$ -NMR spectrum of compound 47 in  $\text{CDCl}_3$ .

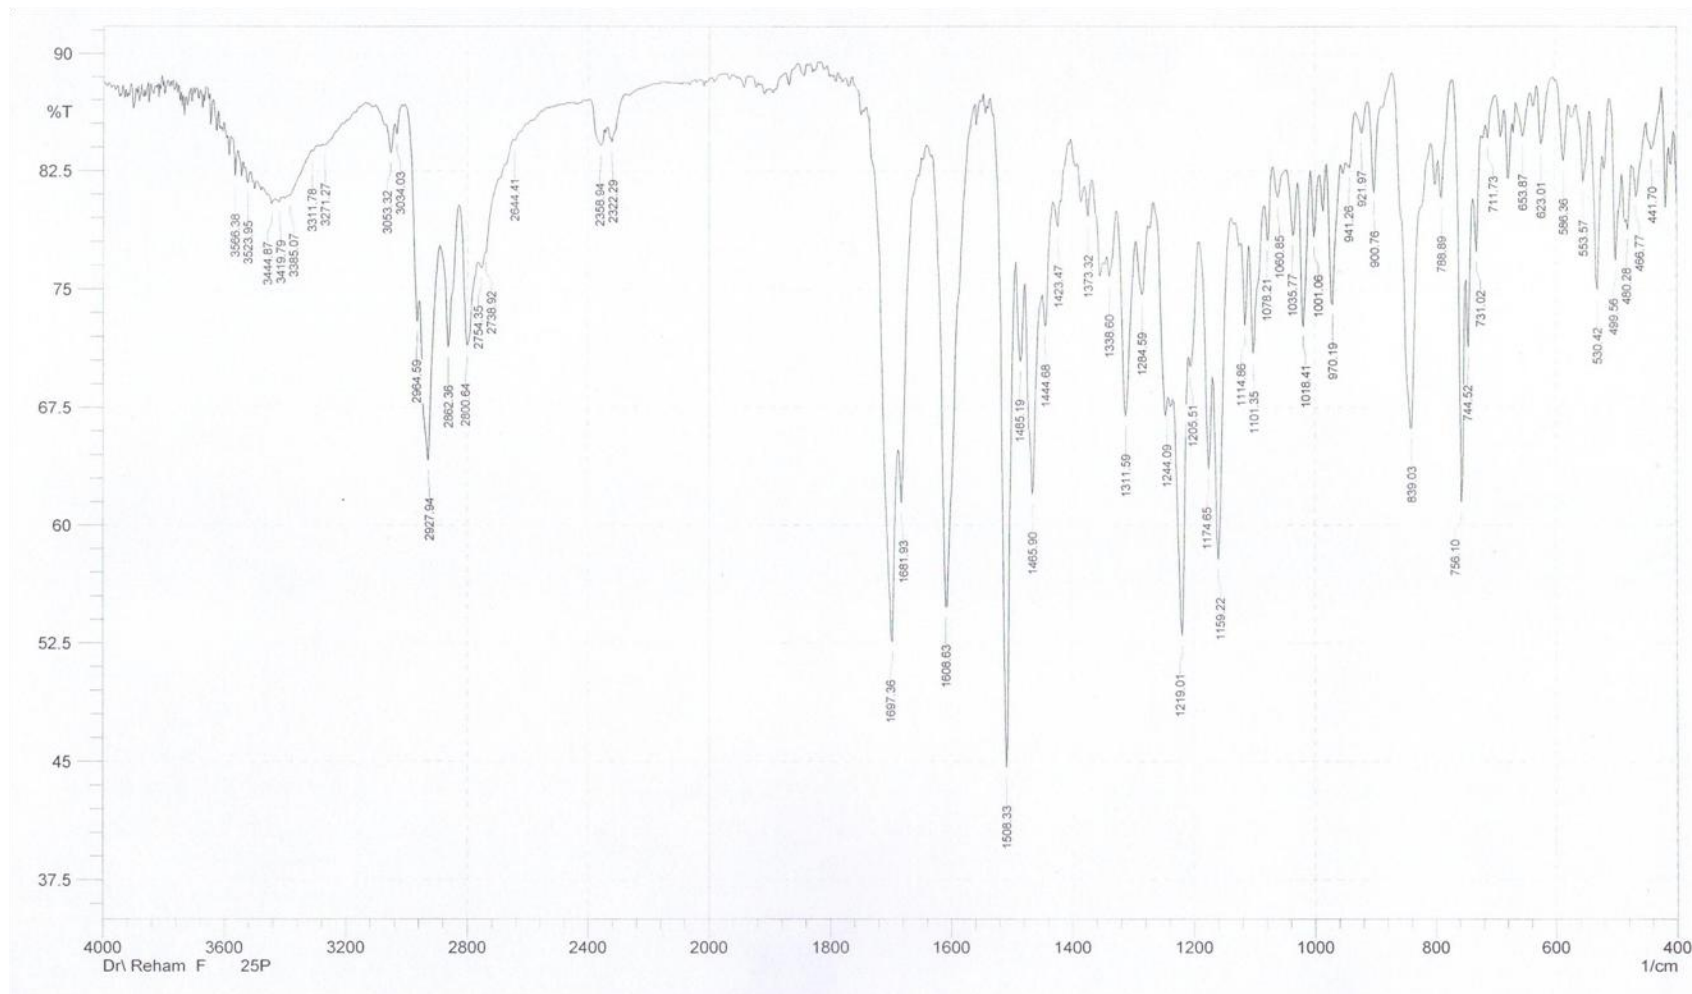

**Figure S61.** IR spectrum of compound **48** (KBr pellet).

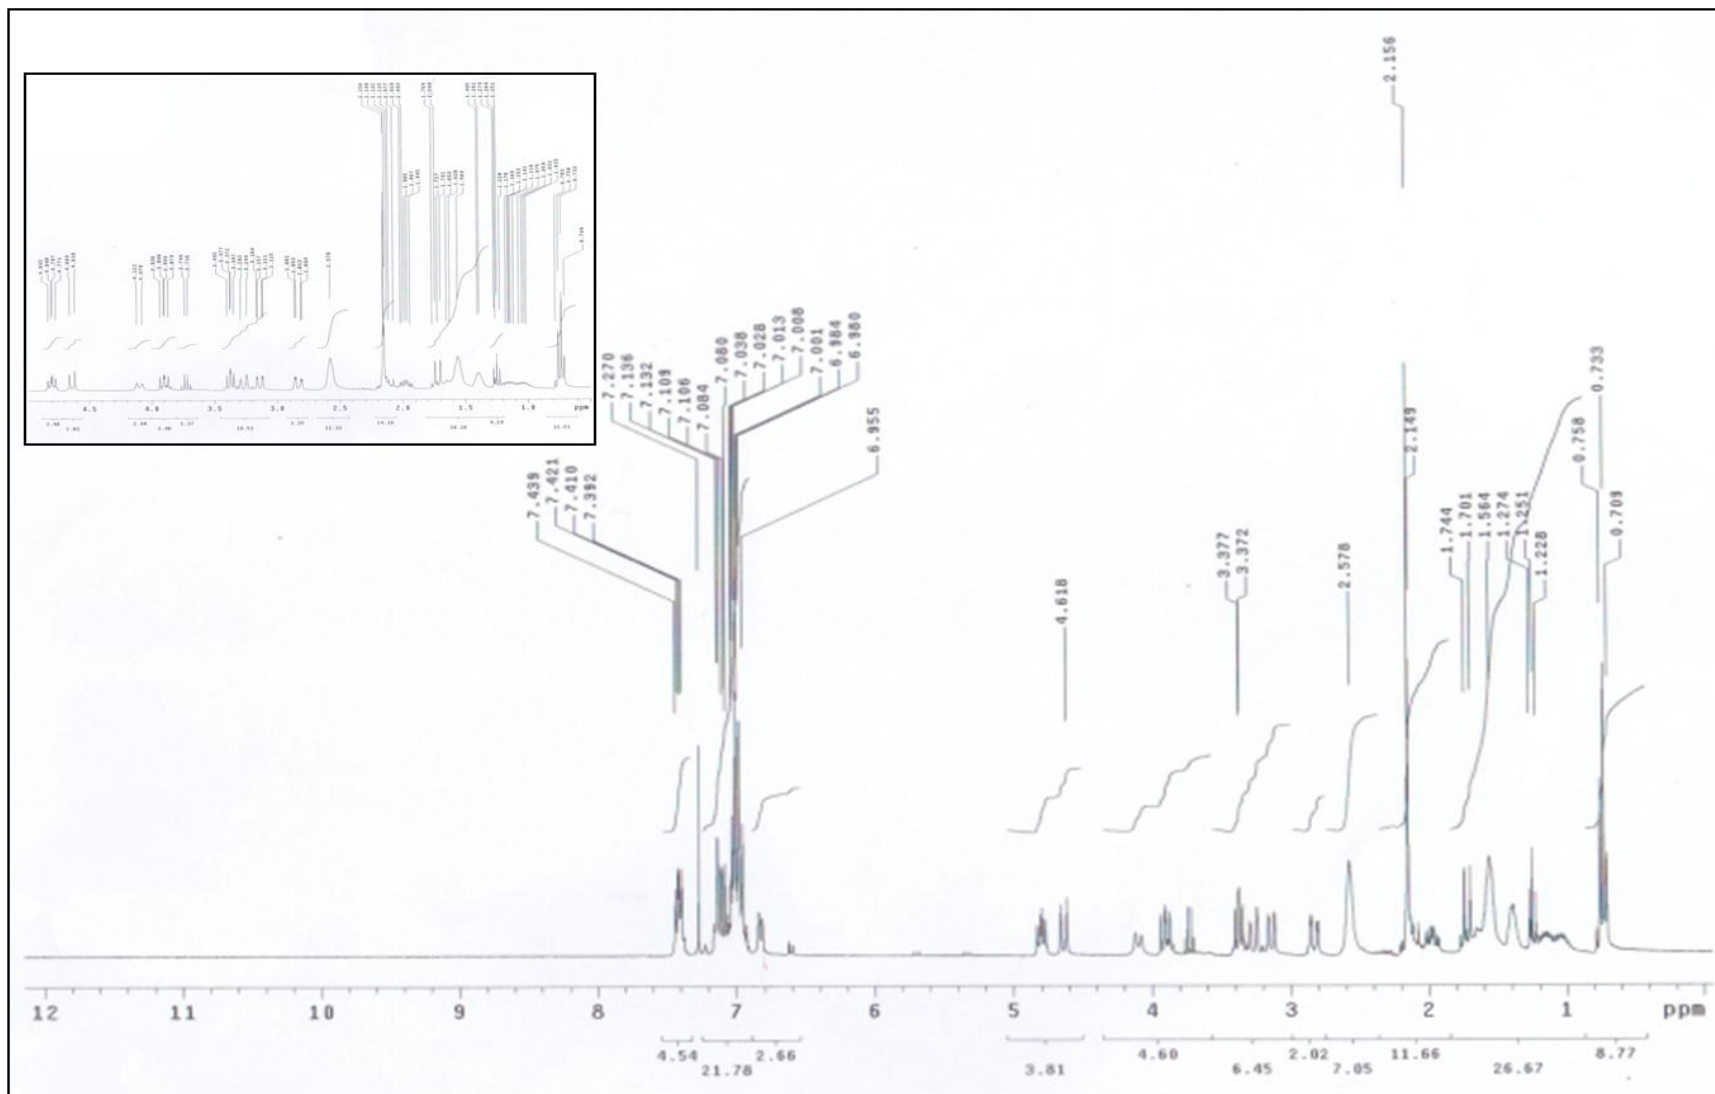

**Figure S62.**  $^1\text{H-NMR}$  spectrum of compound **48** in  $\text{CDCl}_3$ .

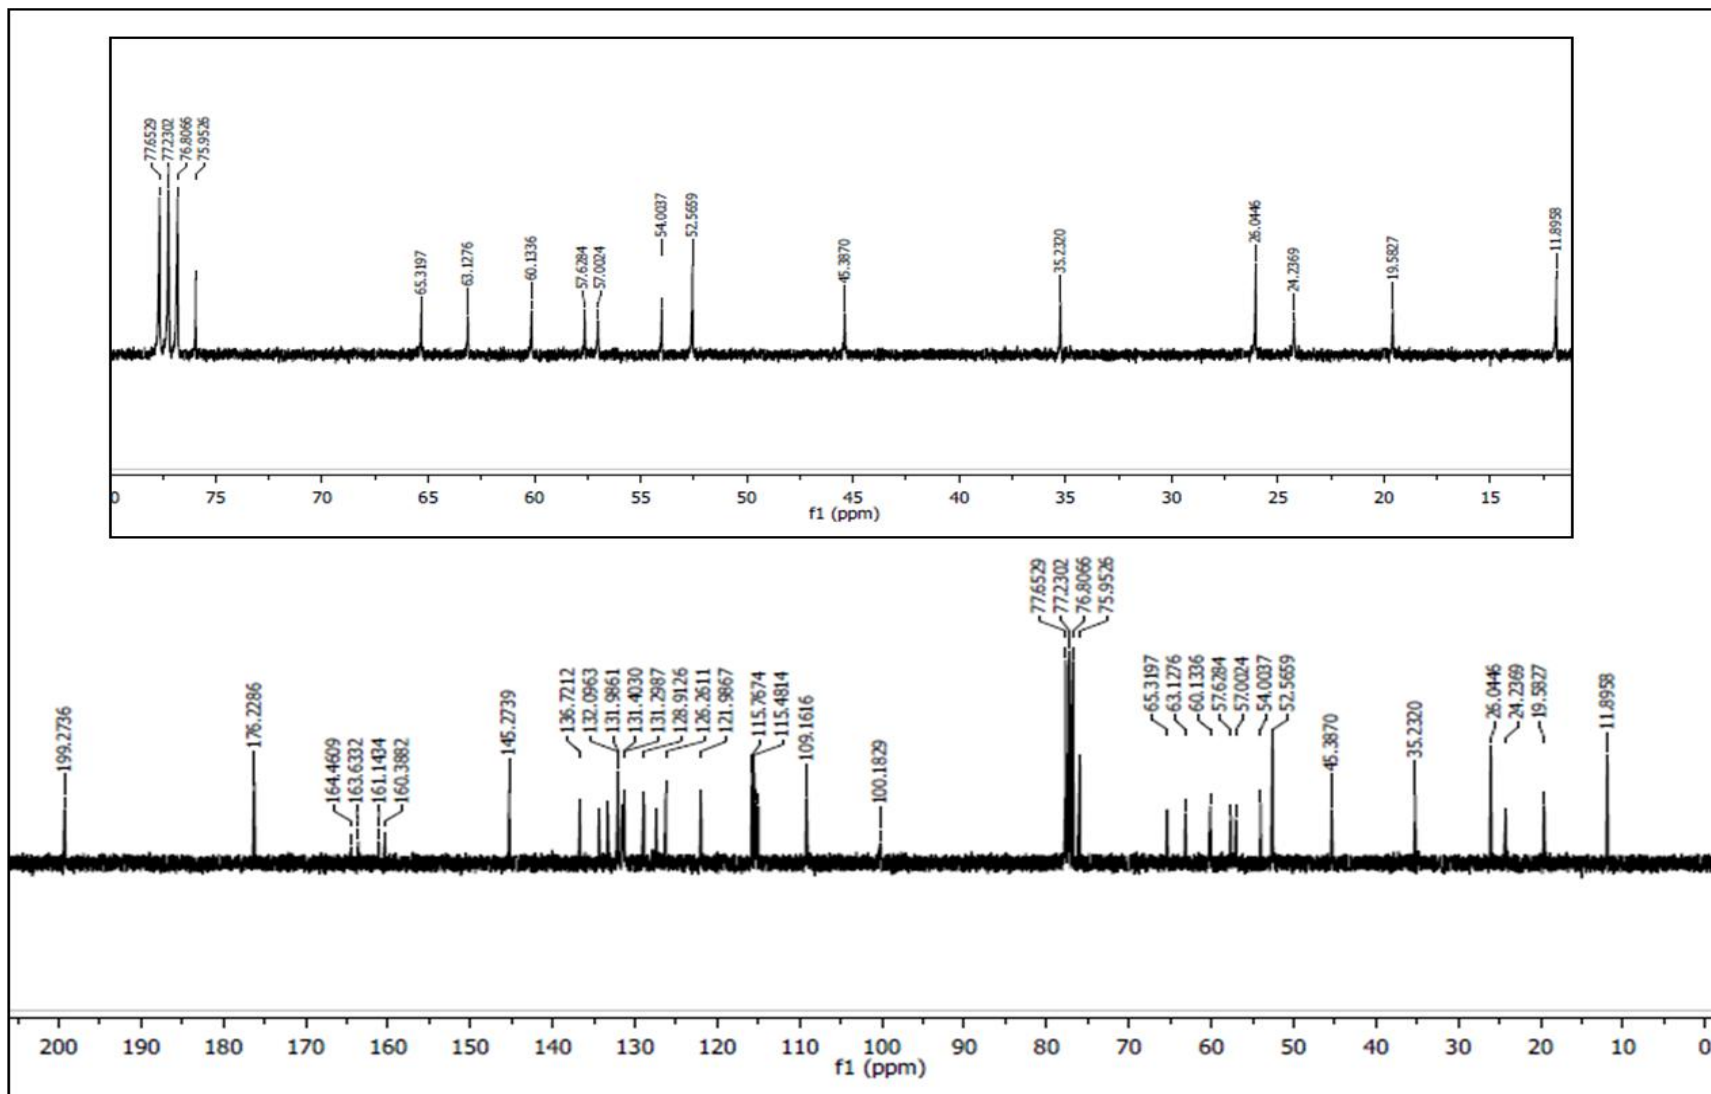

Figure S63.  $^{13}\text{C}$ -NMR spectrum of compound 48 in  $\text{CDCl}_3$ .



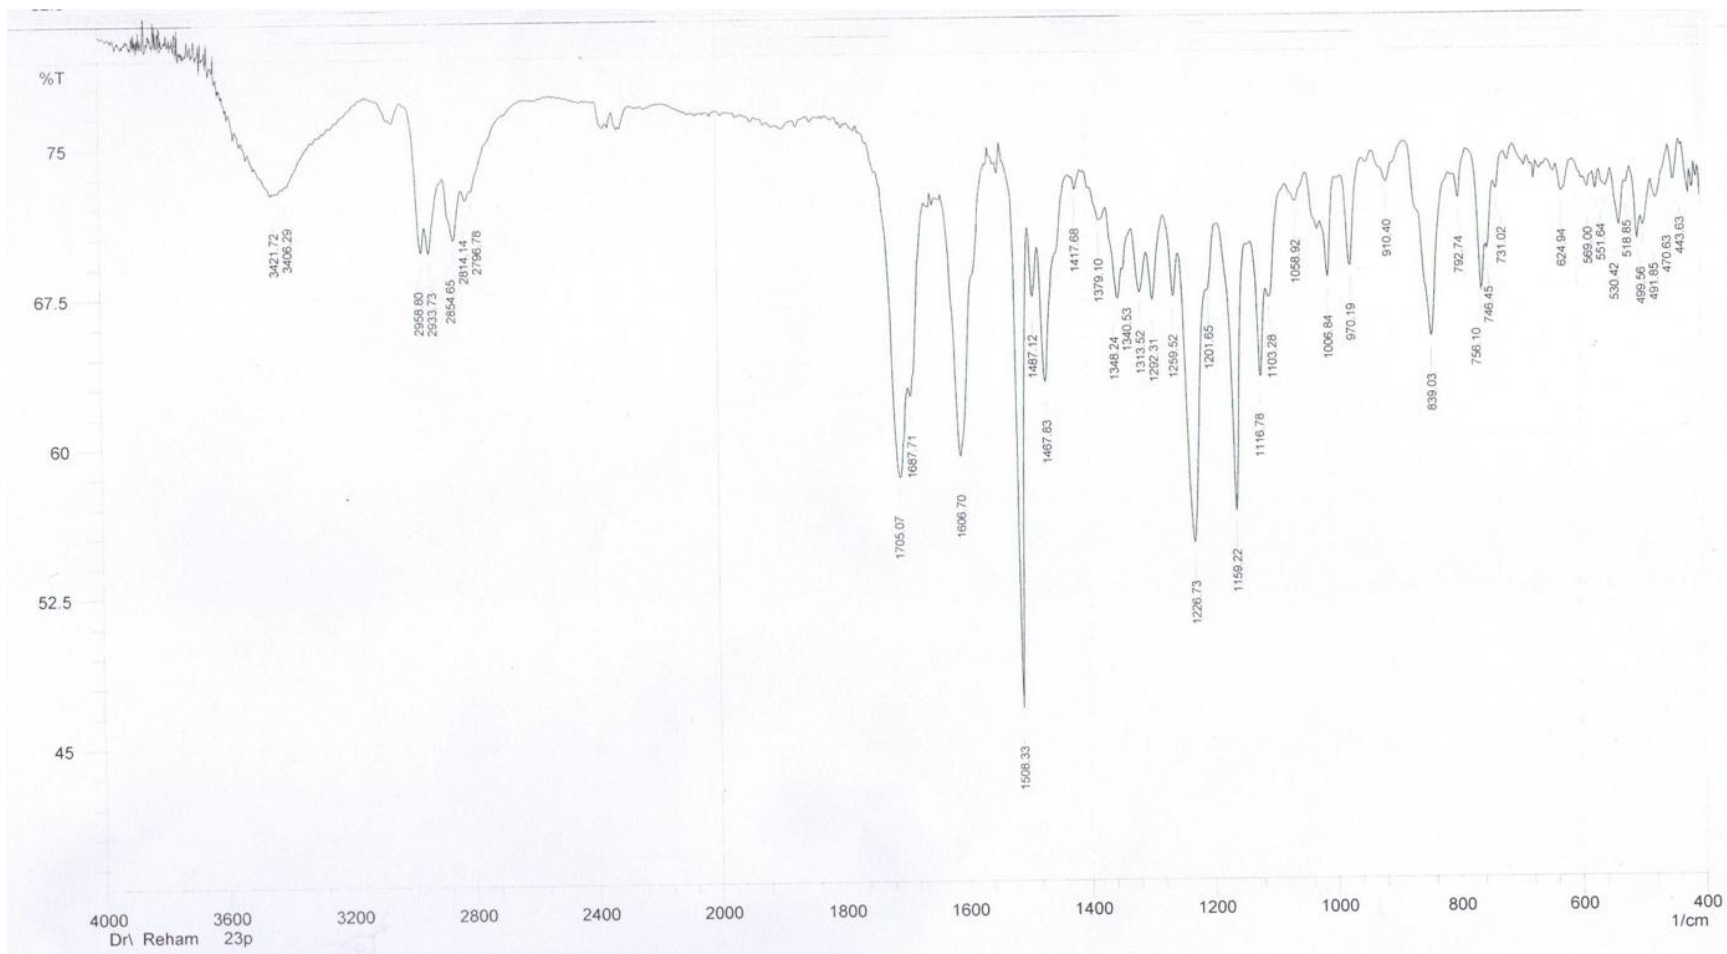

**Figure S64.** IR spectrum of compound **49** (KBr pellet).

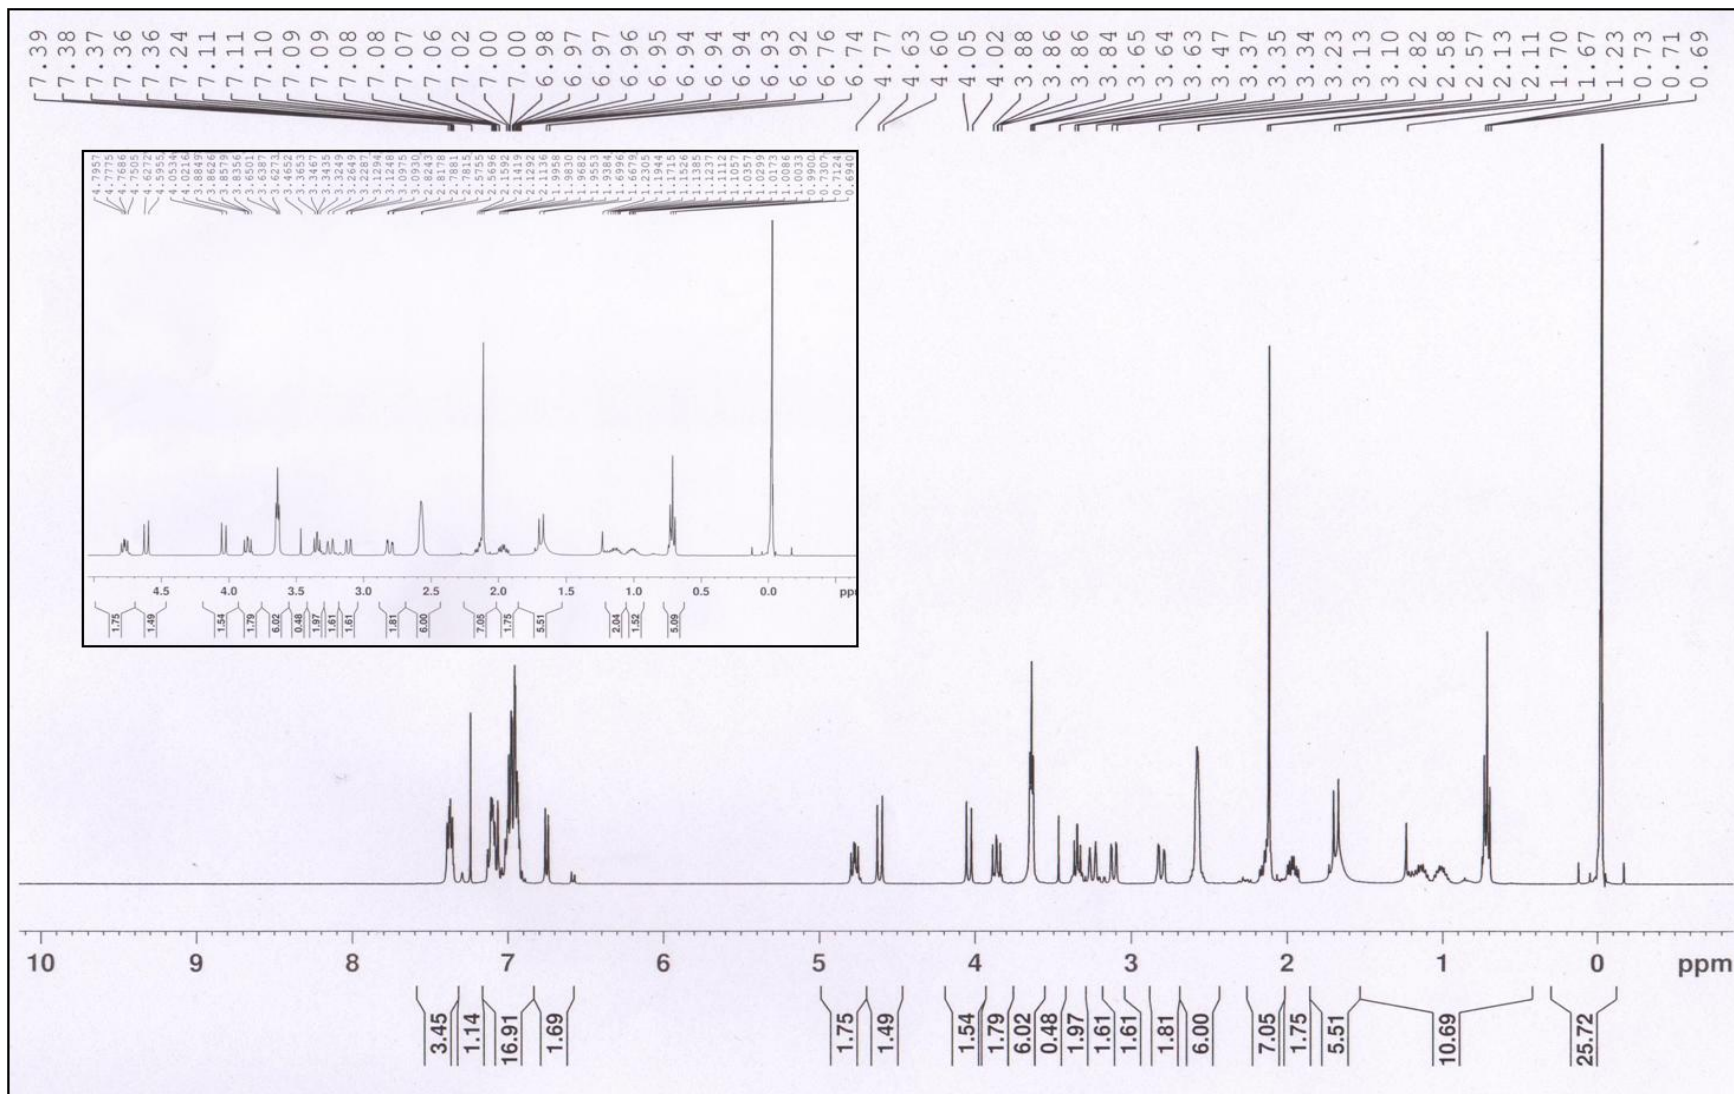

Figure S65. <sup>1</sup>H-NMR spectrum of compound 49 in CDCl<sub>3</sub>.

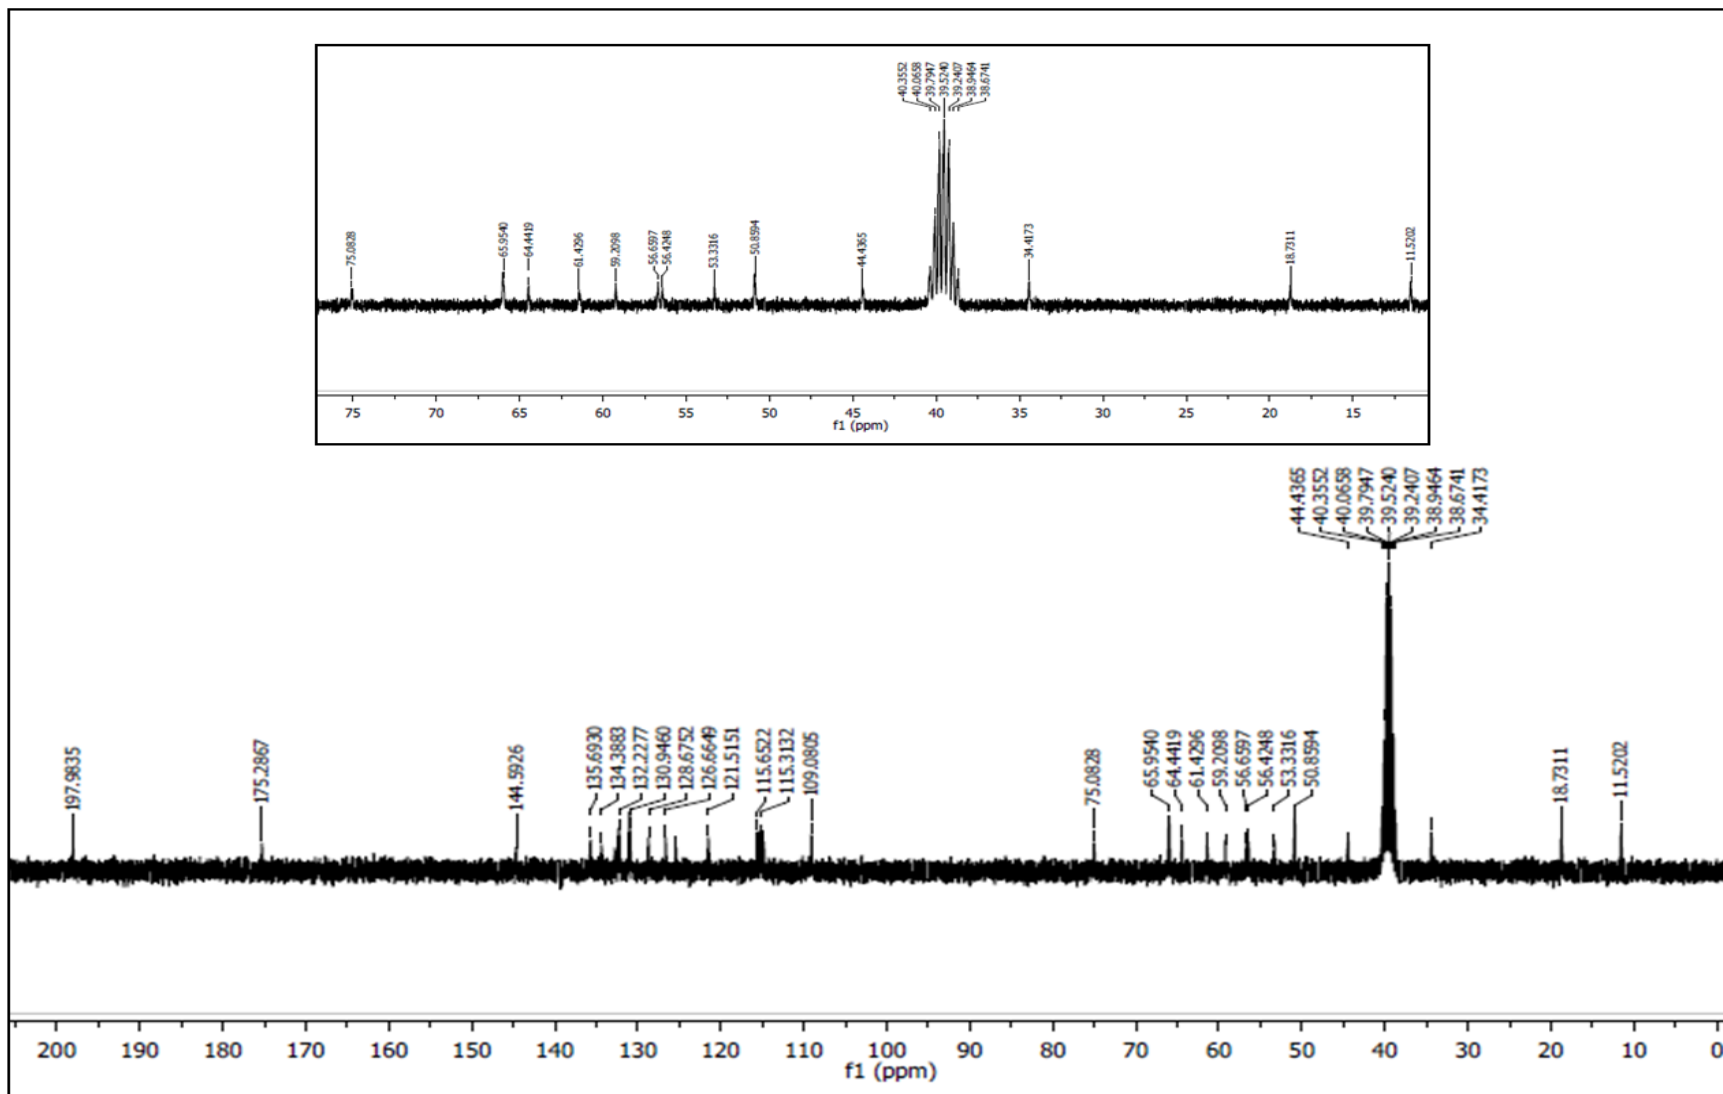

Figure S66.  $^{13}\text{C}$ -NMR spectrum of compound **49** in  $\text{DMSO-}d_6$ .

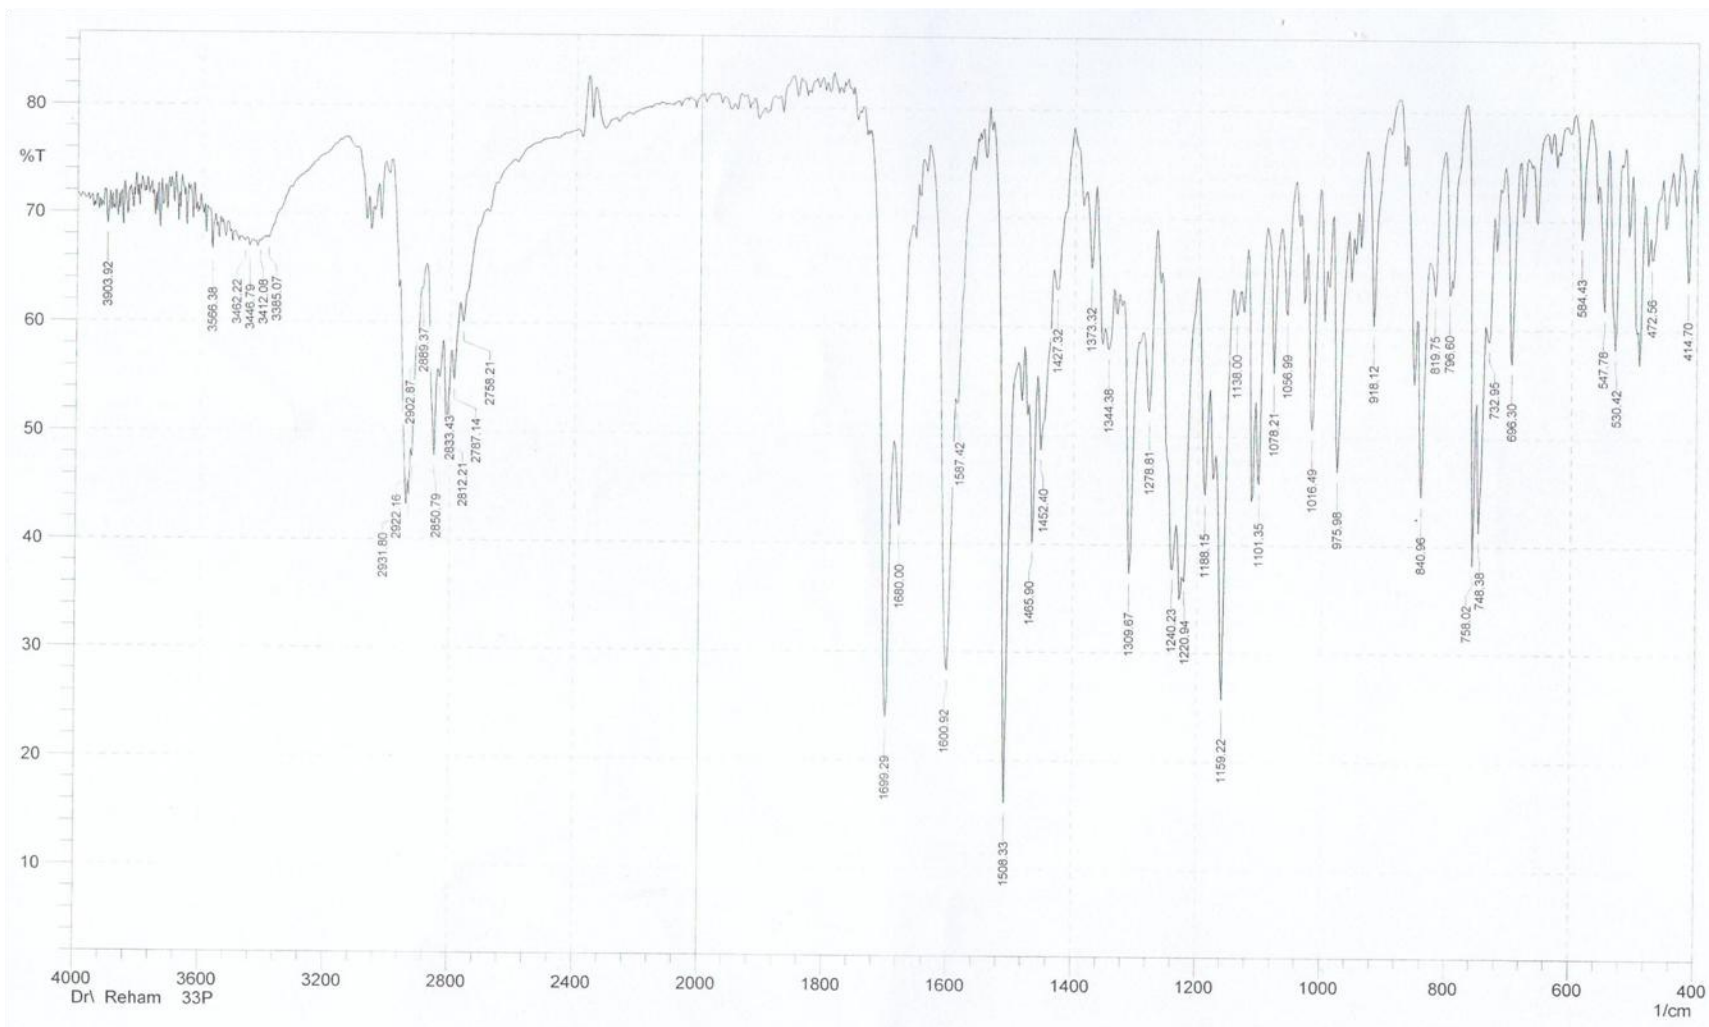

**Figure S67.** IR spectrum of compound **50** (KBr pellet).

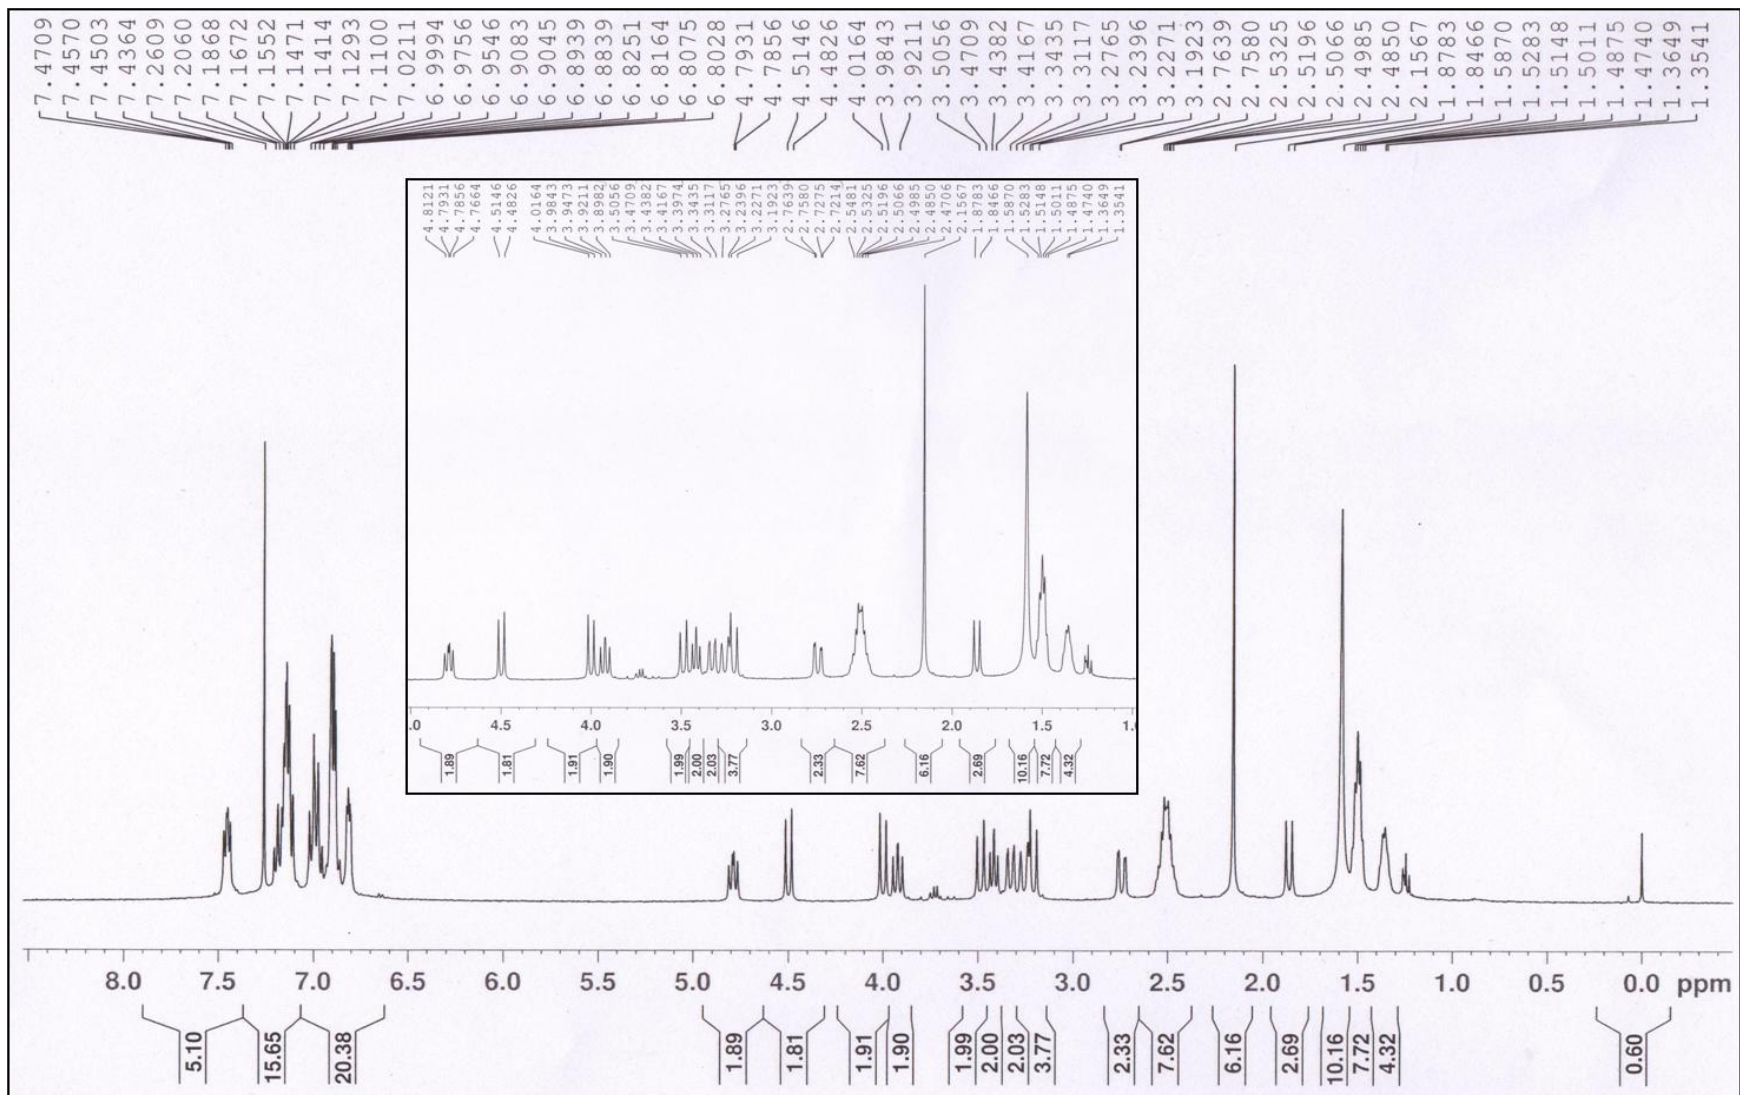

Figure S68.  $^1\text{H-NMR}$  spectrum of compound **50** in  $\text{CDCl}_3$ .

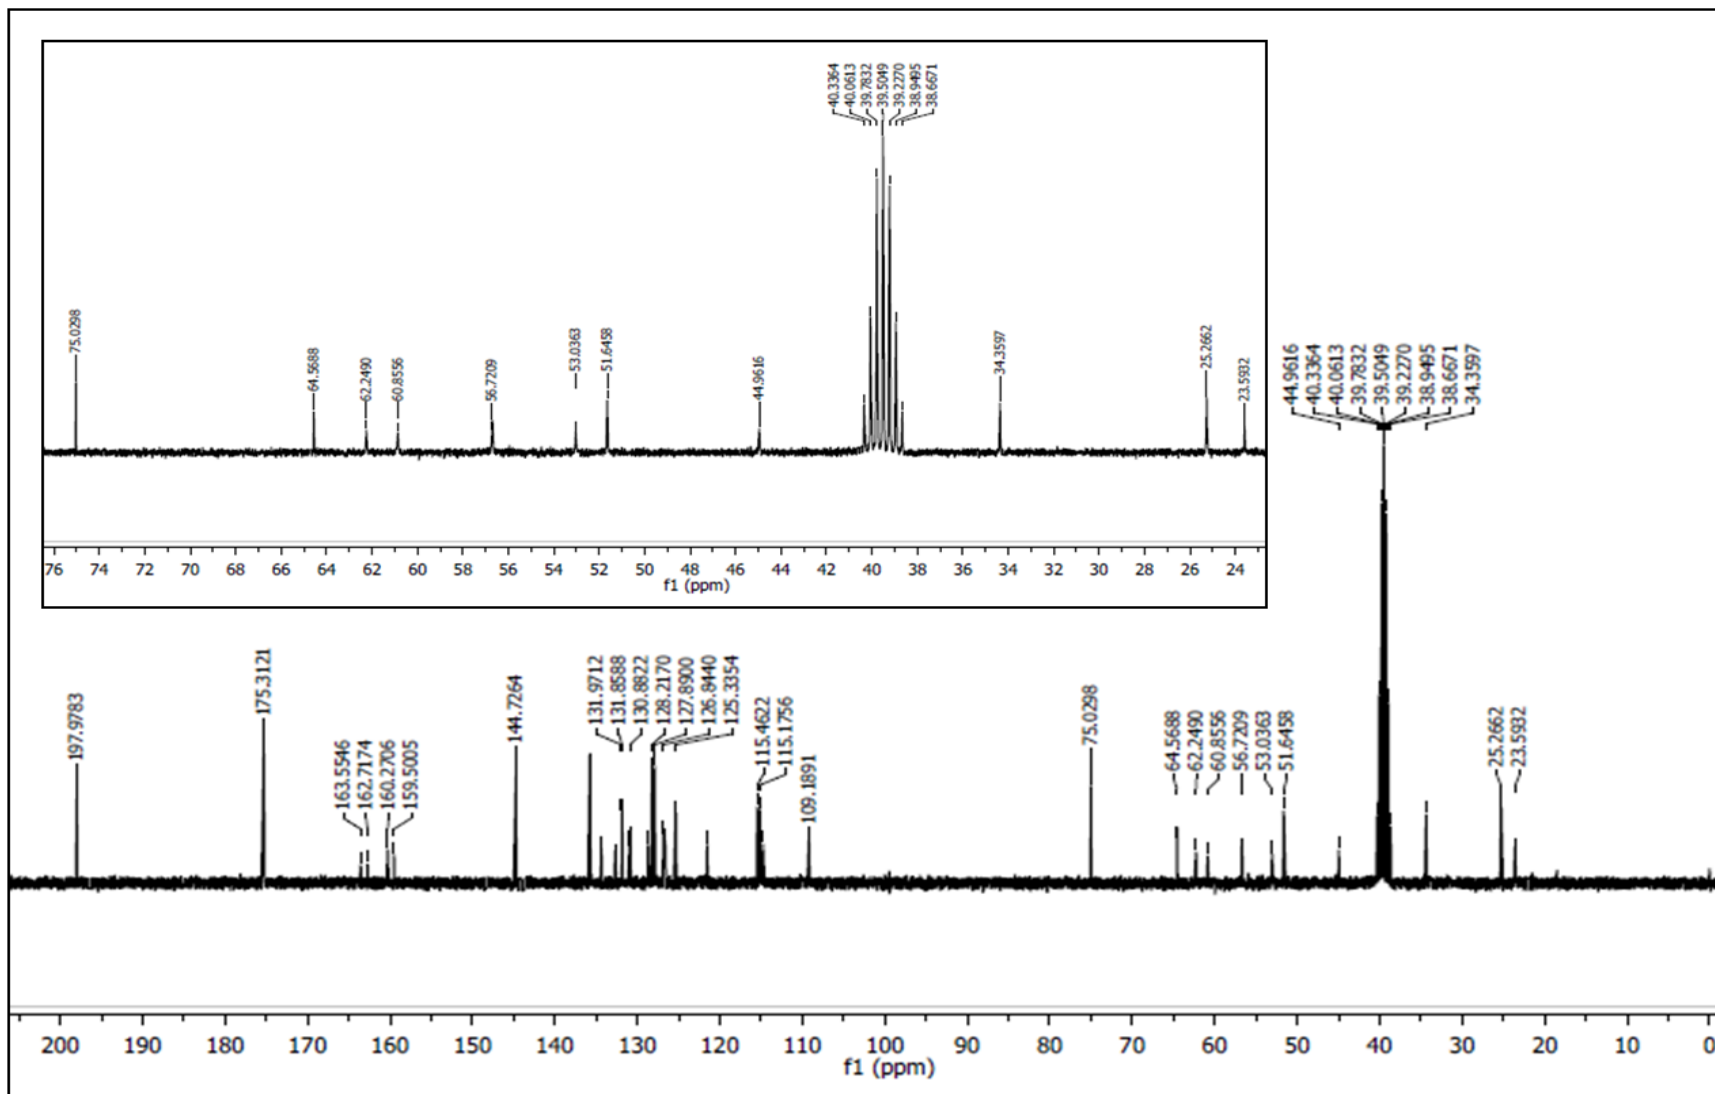

Figure S69.  $^{13}\text{C}$ -NMR spectrum of compound **50** in  $\text{DMSO-}d_6$ .

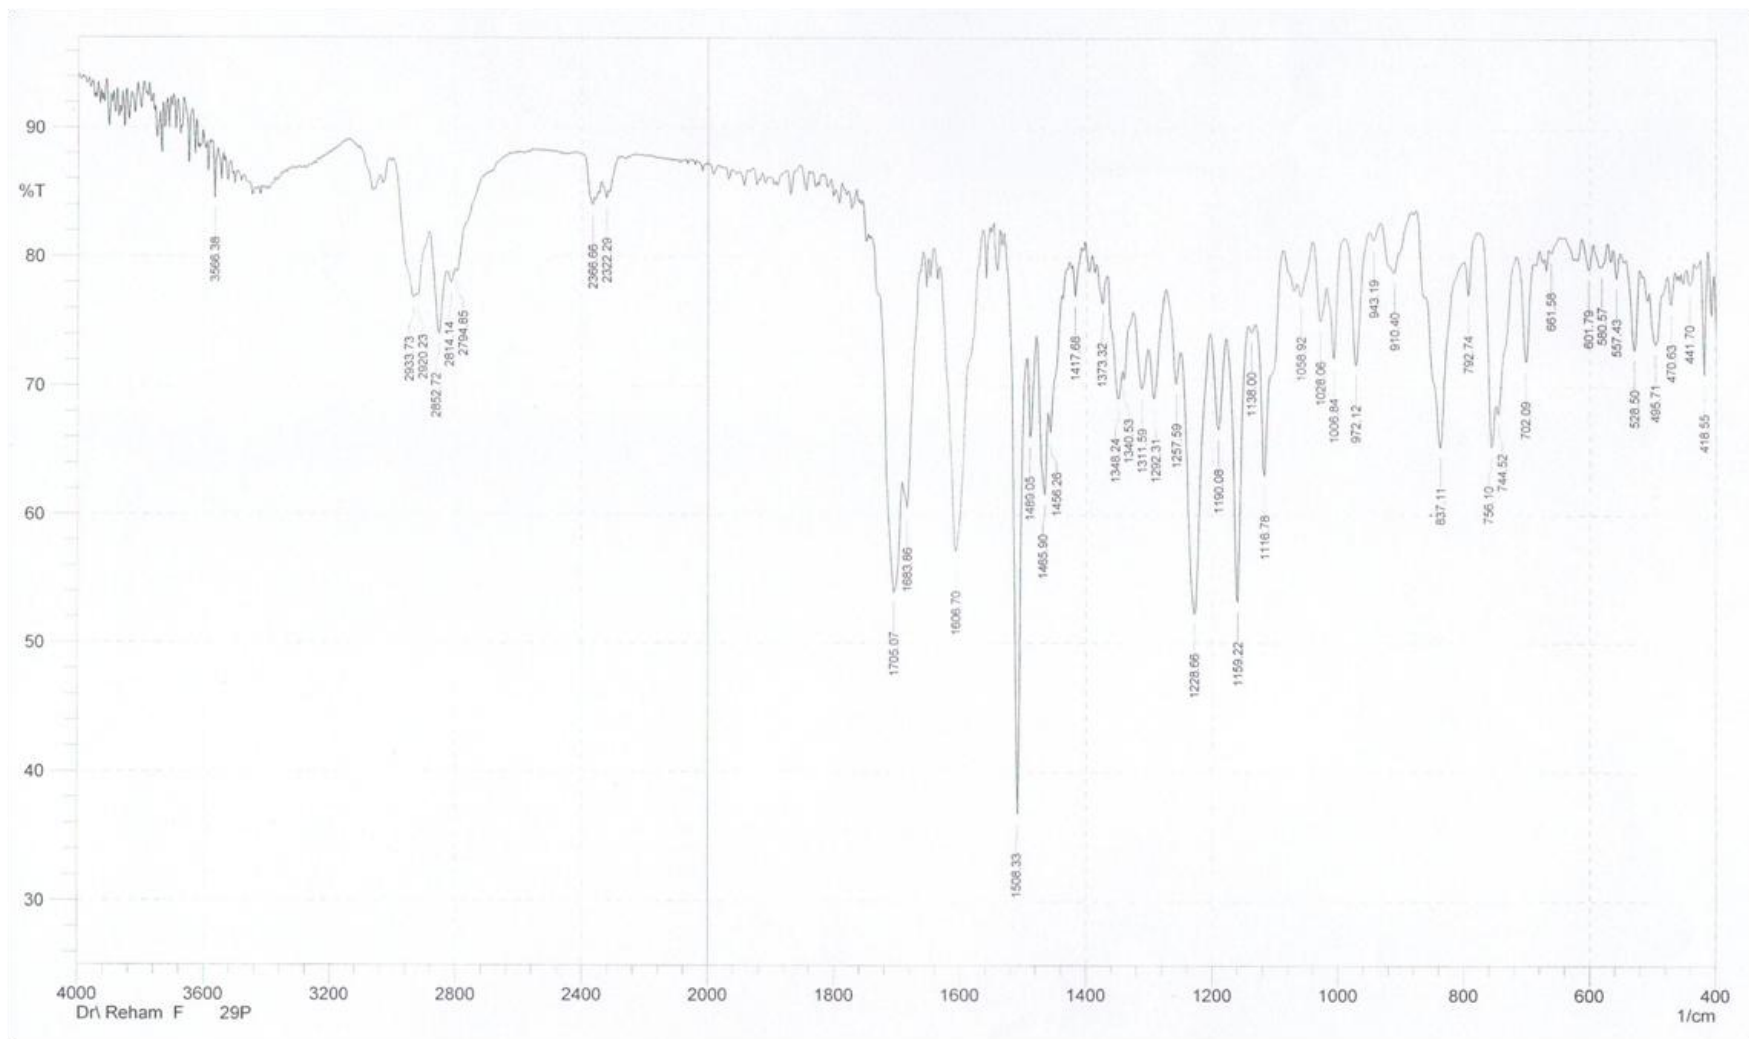

**Figure S70.** IR spectrum of compound **51** (KBr pellet).

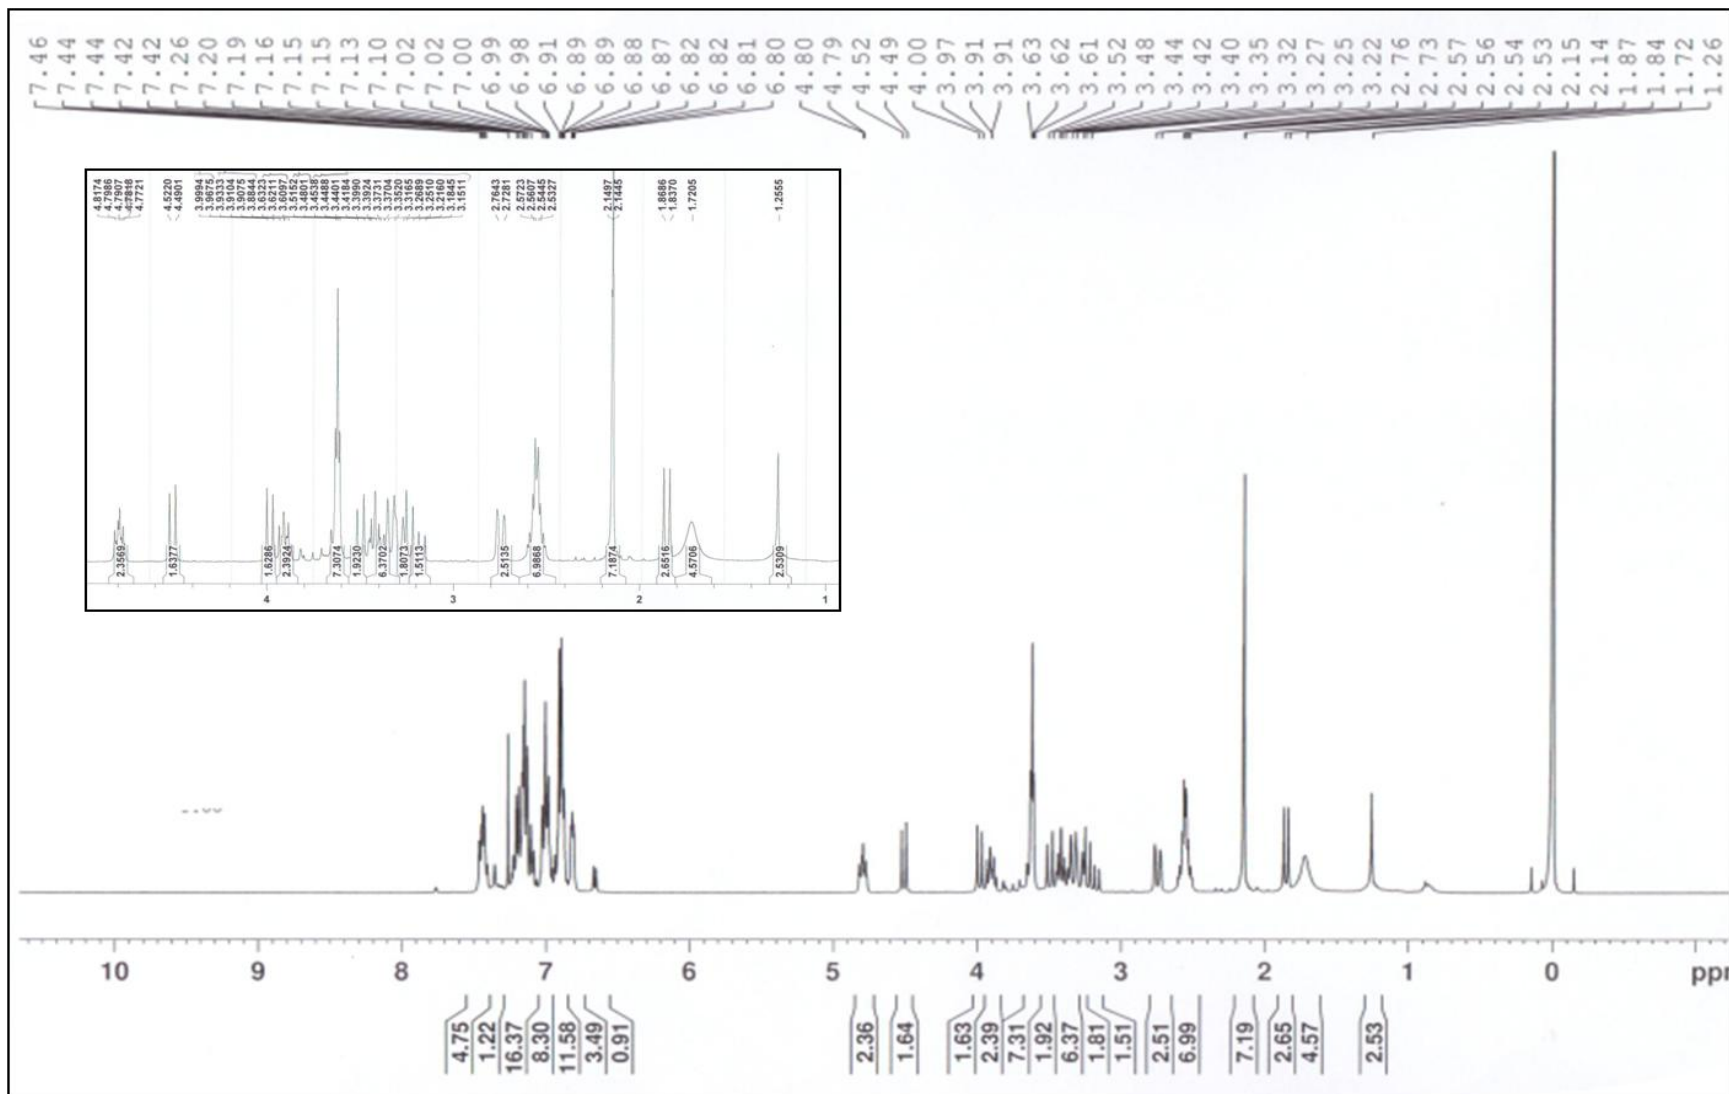

**Figure S71.**  $^1\text{H-NMR}$  spectrum of compound **51** in  $\text{CDCl}_3$ .



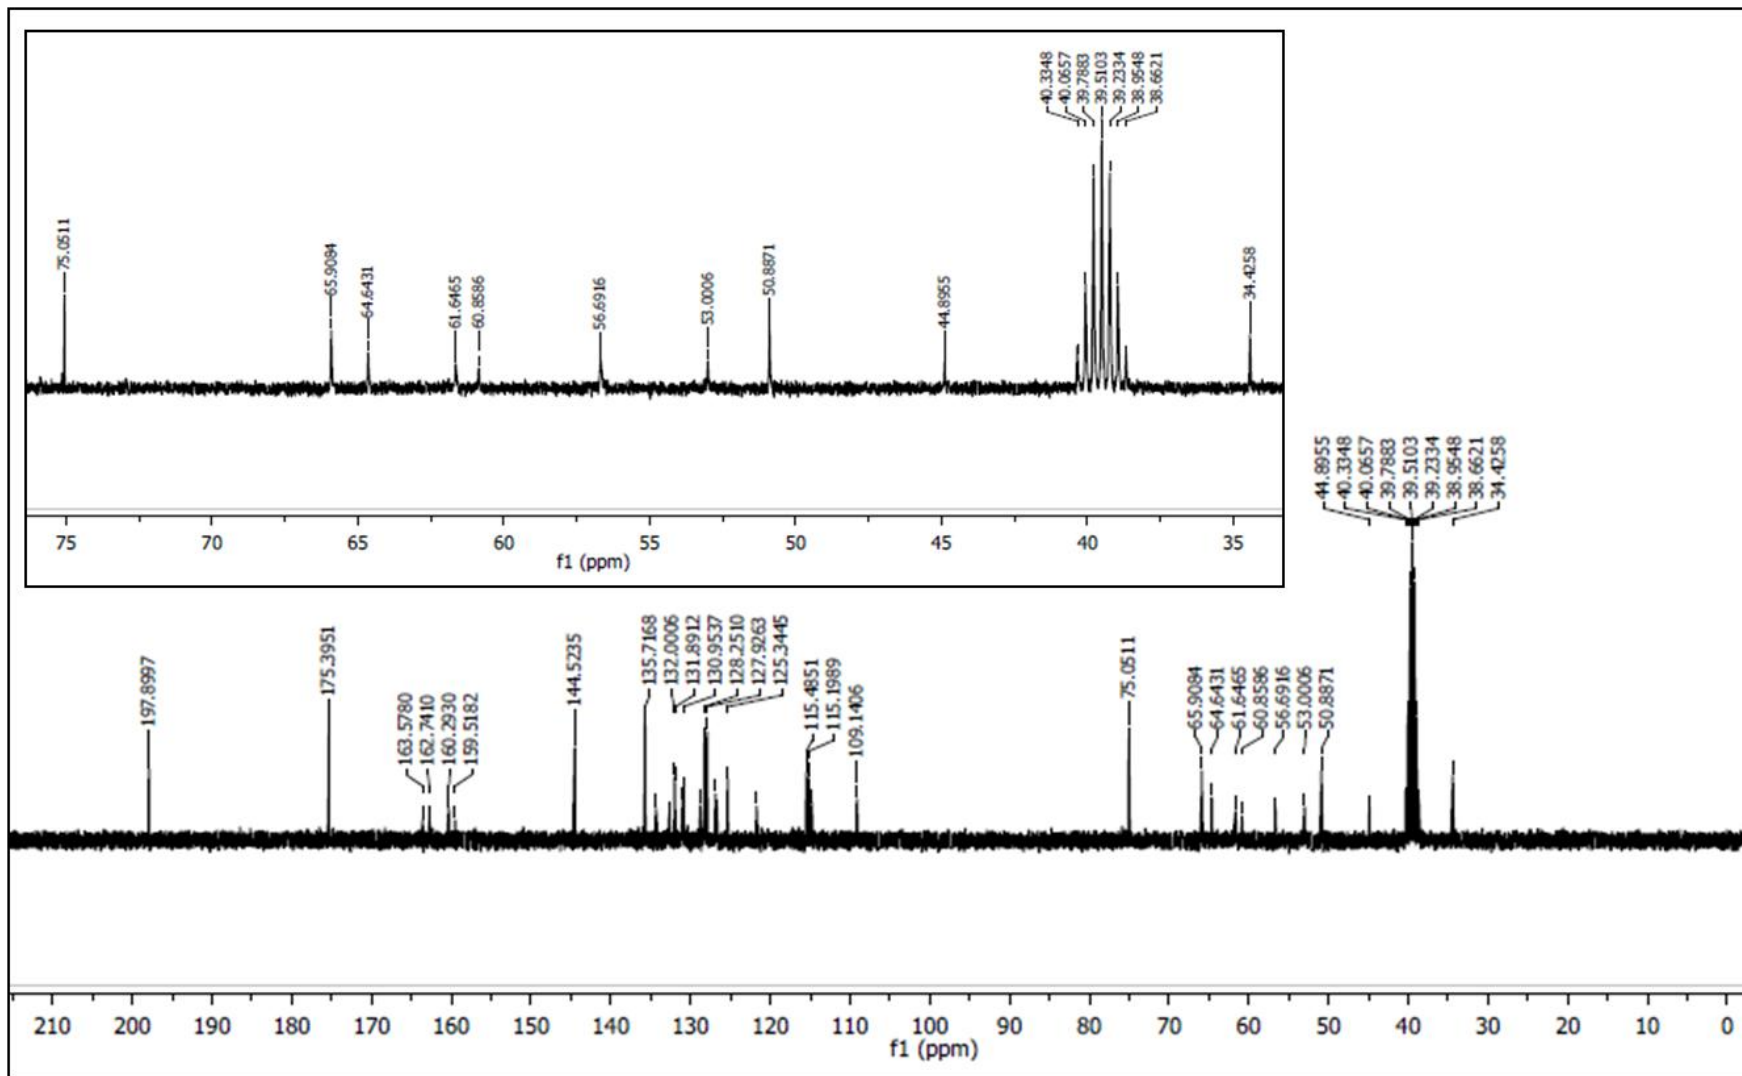

**Figure S72.**  $^{13}\text{C}$ -NMR spectrum of compound **51** in  $\text{DMSO-}d_6$ .

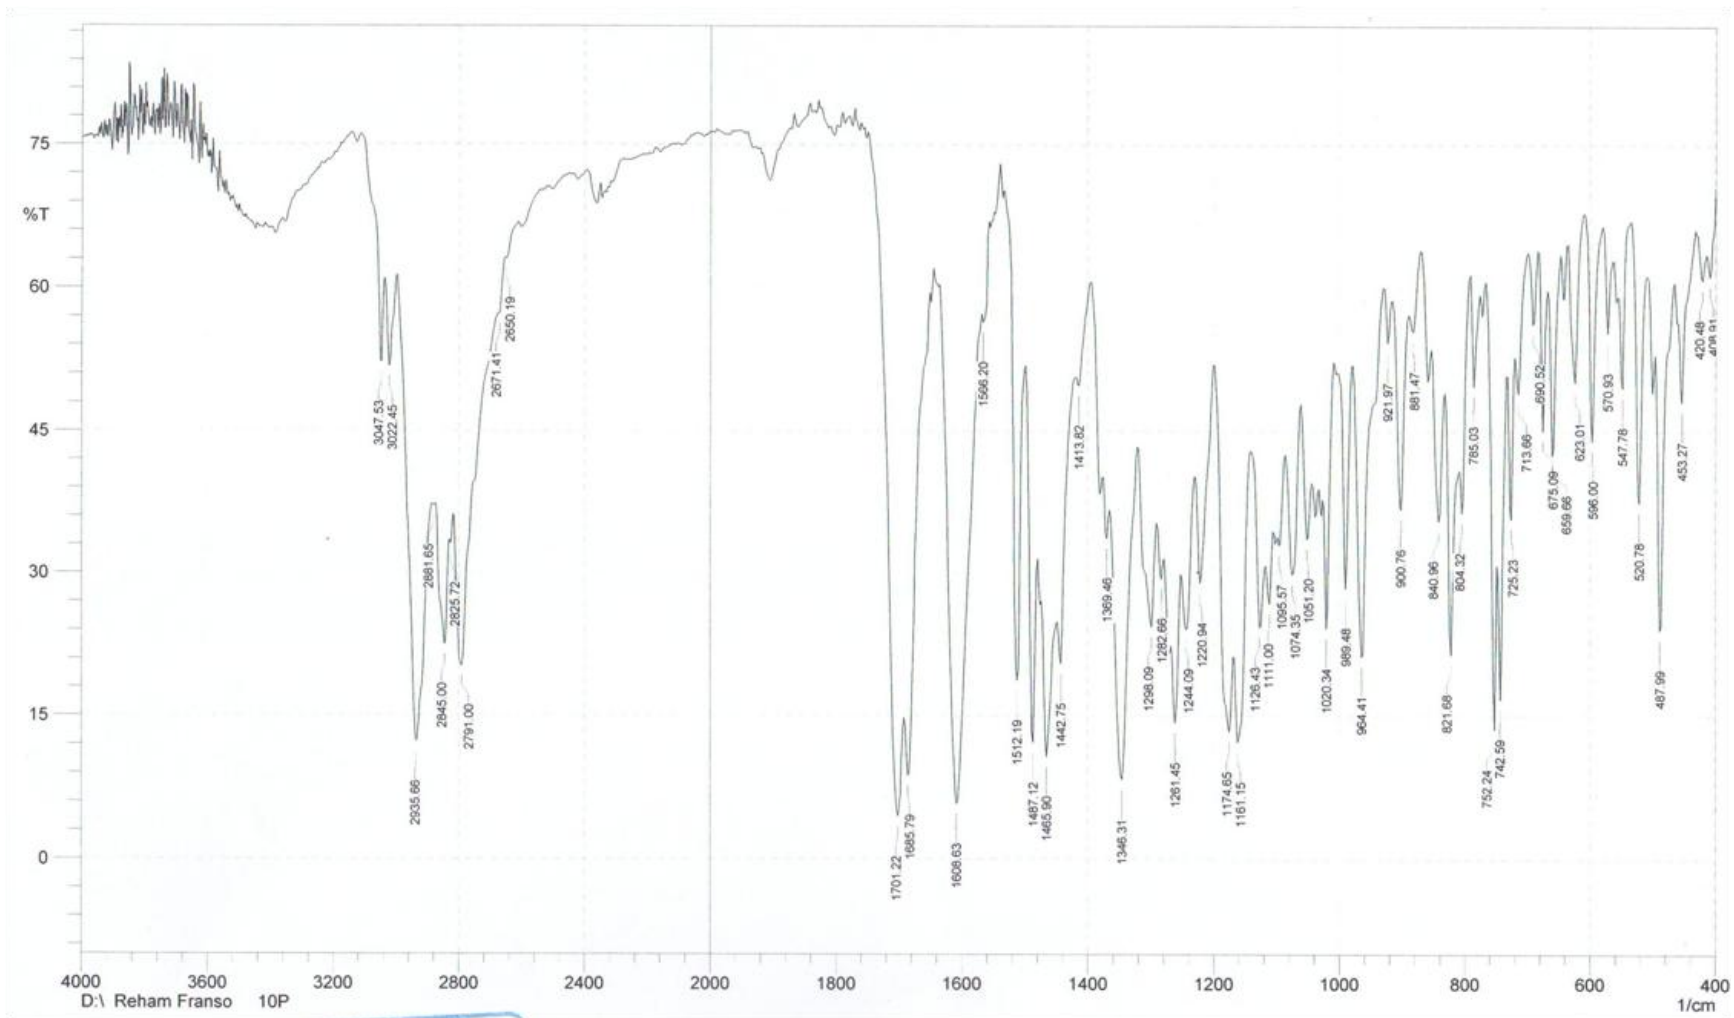

**Figure S73.** IR spectrum of compound **52** (KBr pellet).

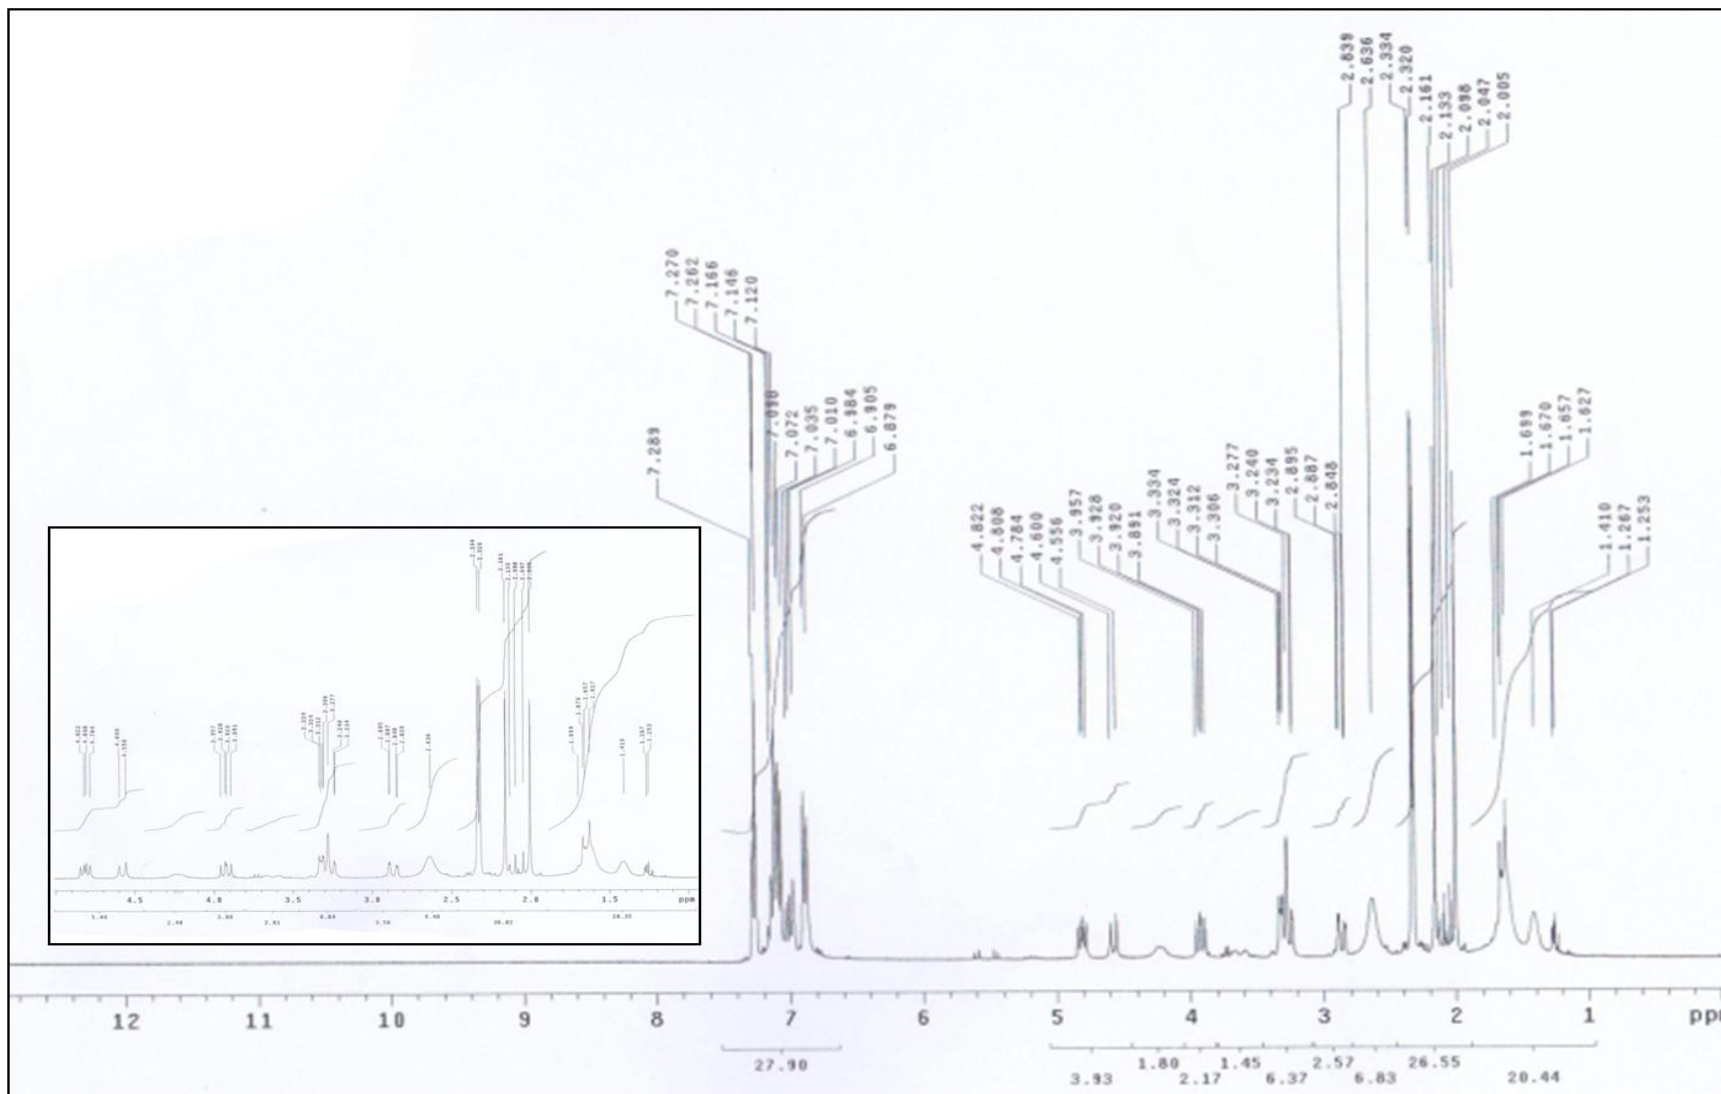

**Figure S74.**  $^1\text{H-NMR}$  spectrum of compound **52** in  $\text{CDCl}_3$ .

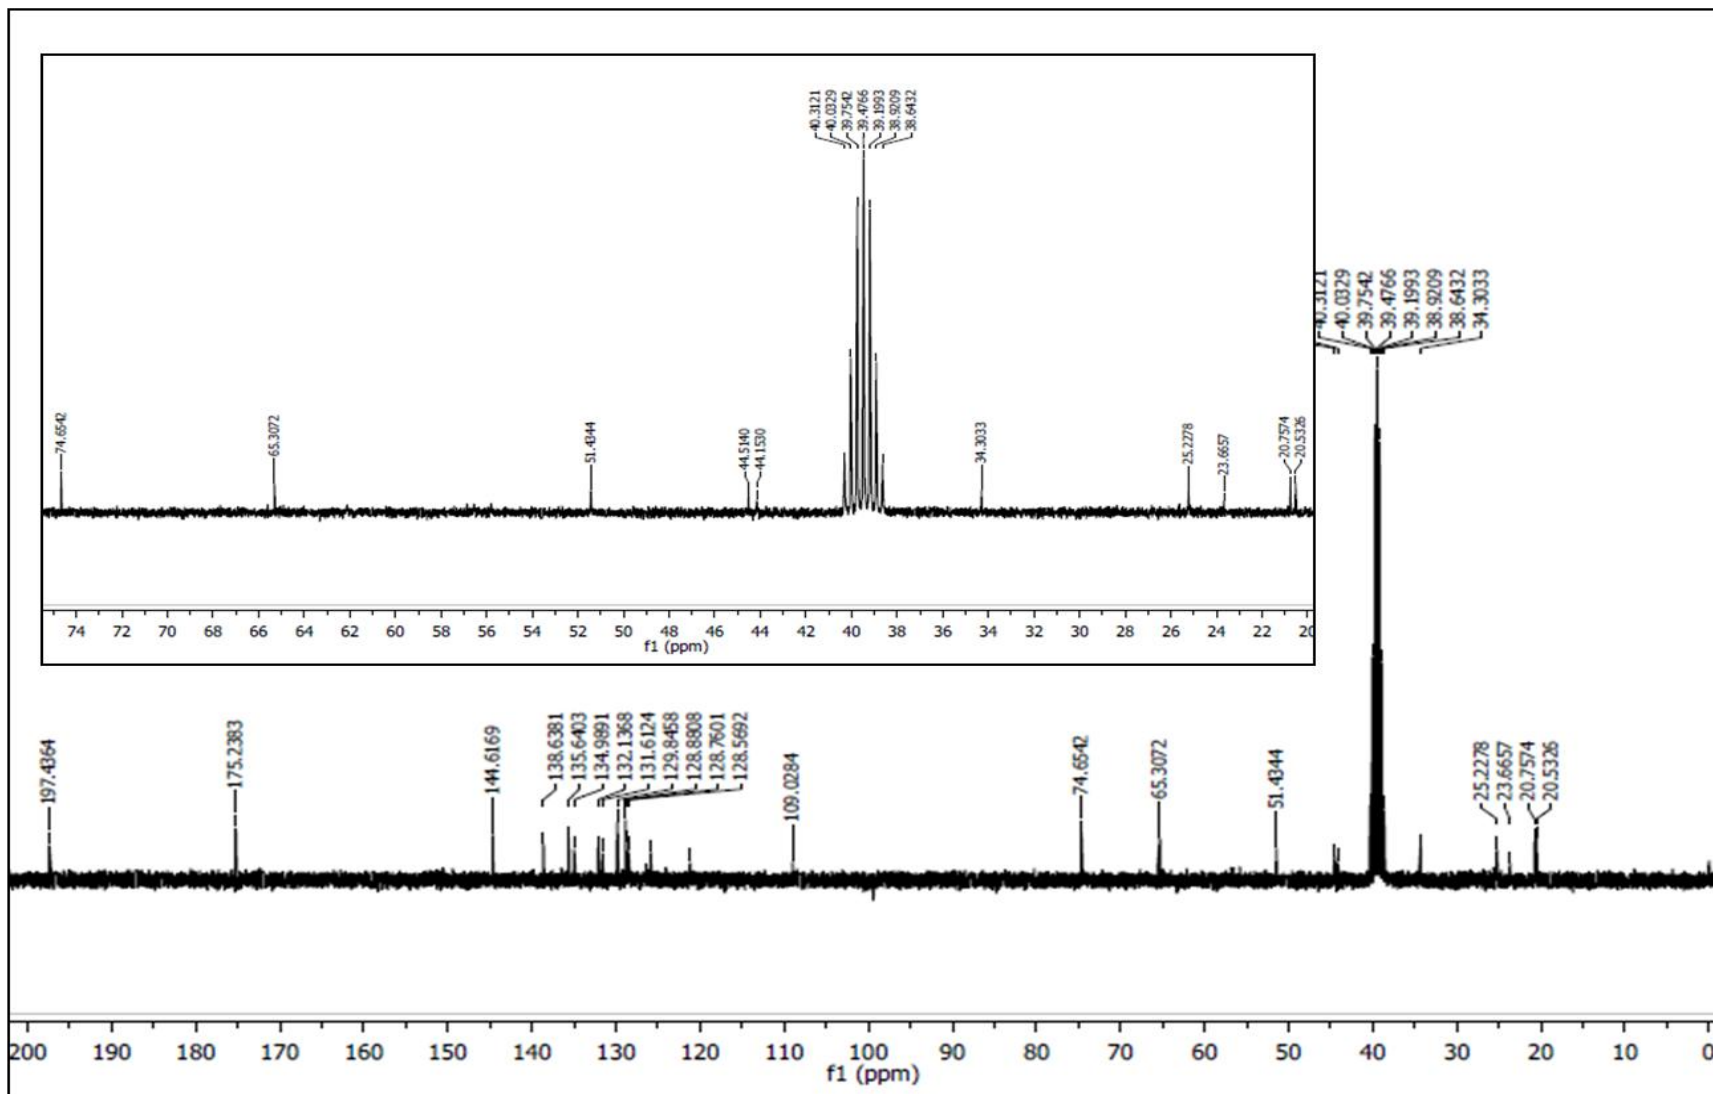

Figure S75.  $^{13}\text{C}$ -NMR spectrum of compound **52** in  $\text{DMSO-}d_6$ .

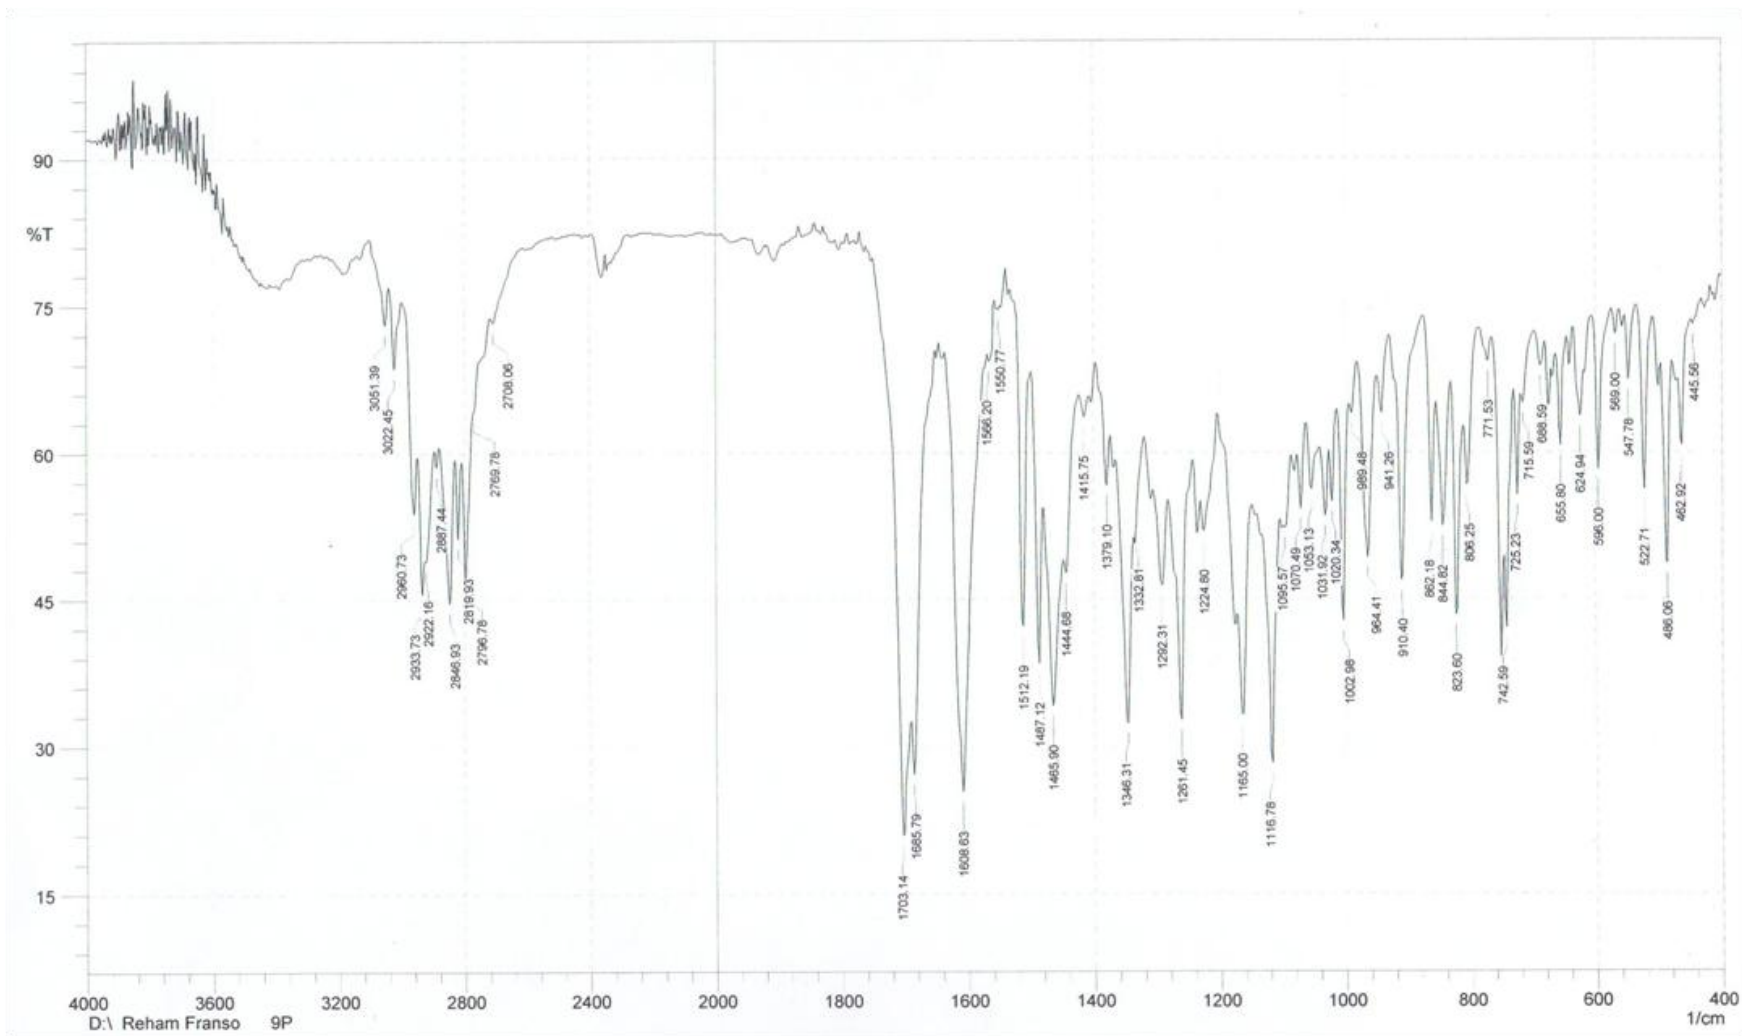

Figure S76. IR spectrum of compound 53 (KBr pellet).

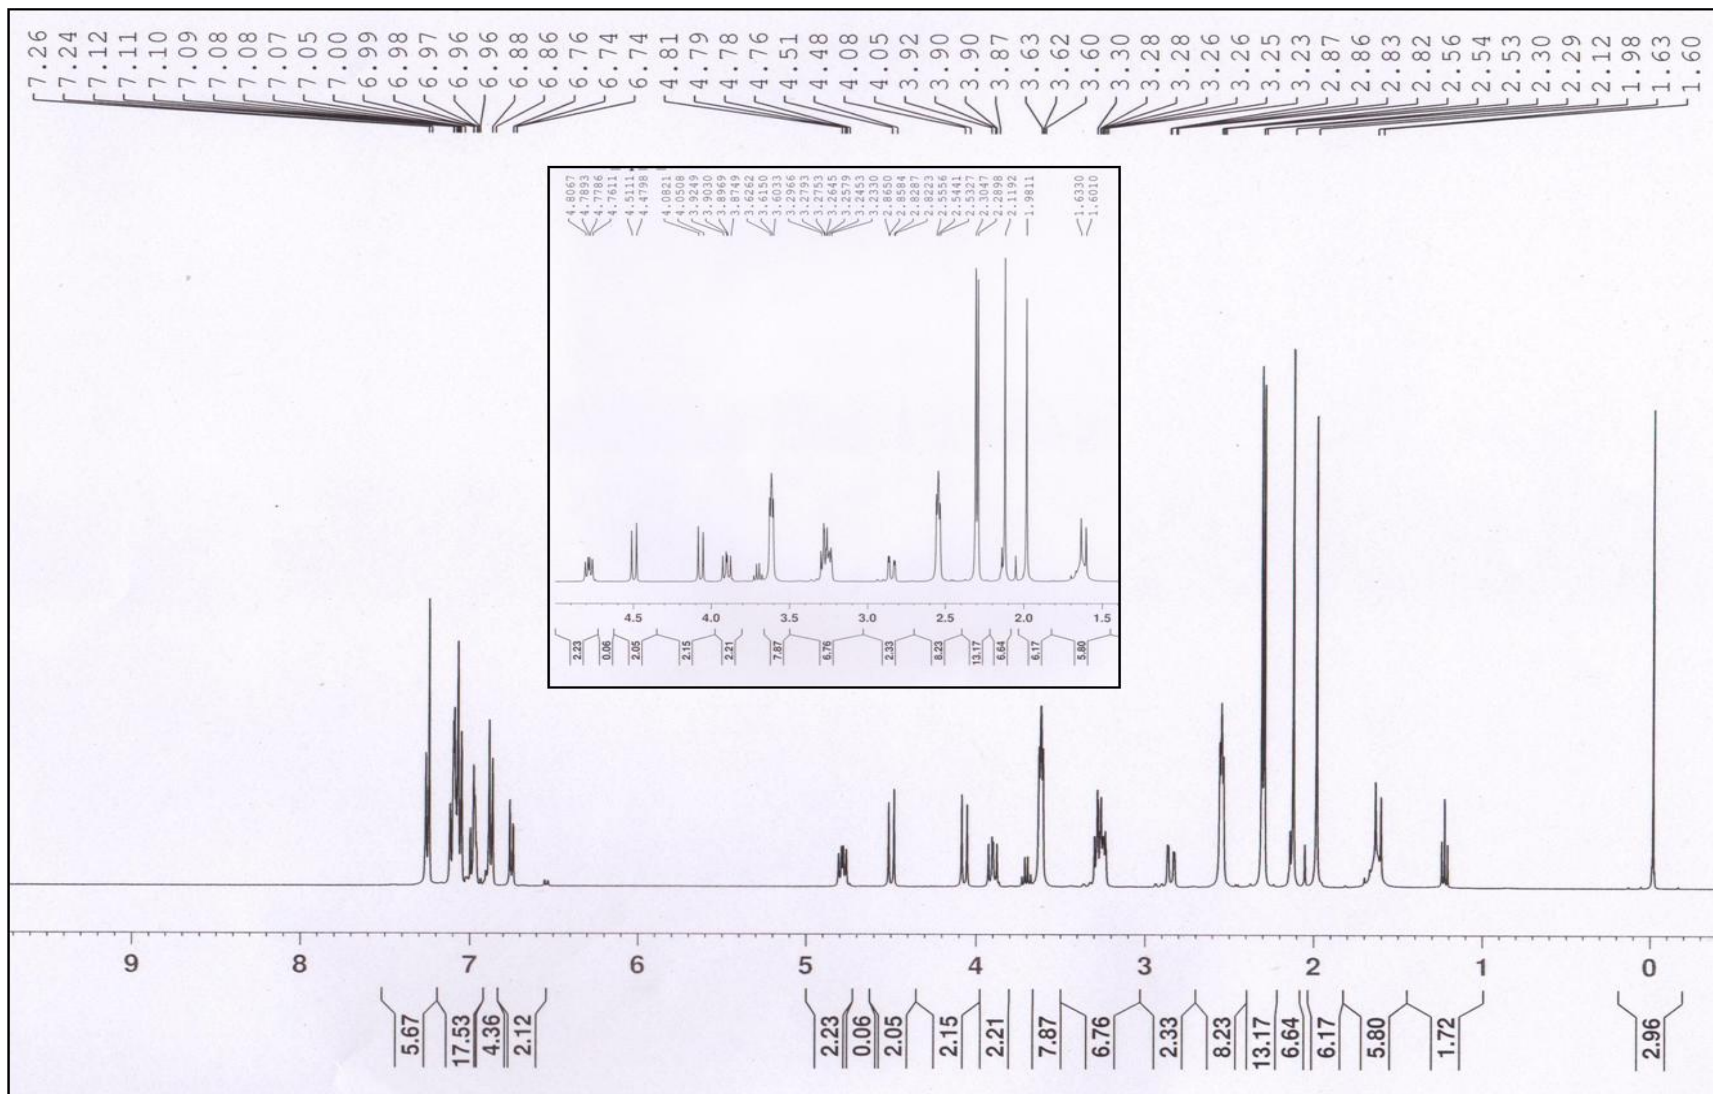

Figure S77. <sup>1</sup>H-NMR spectrum of compound **53** in CDCl<sub>3</sub>.

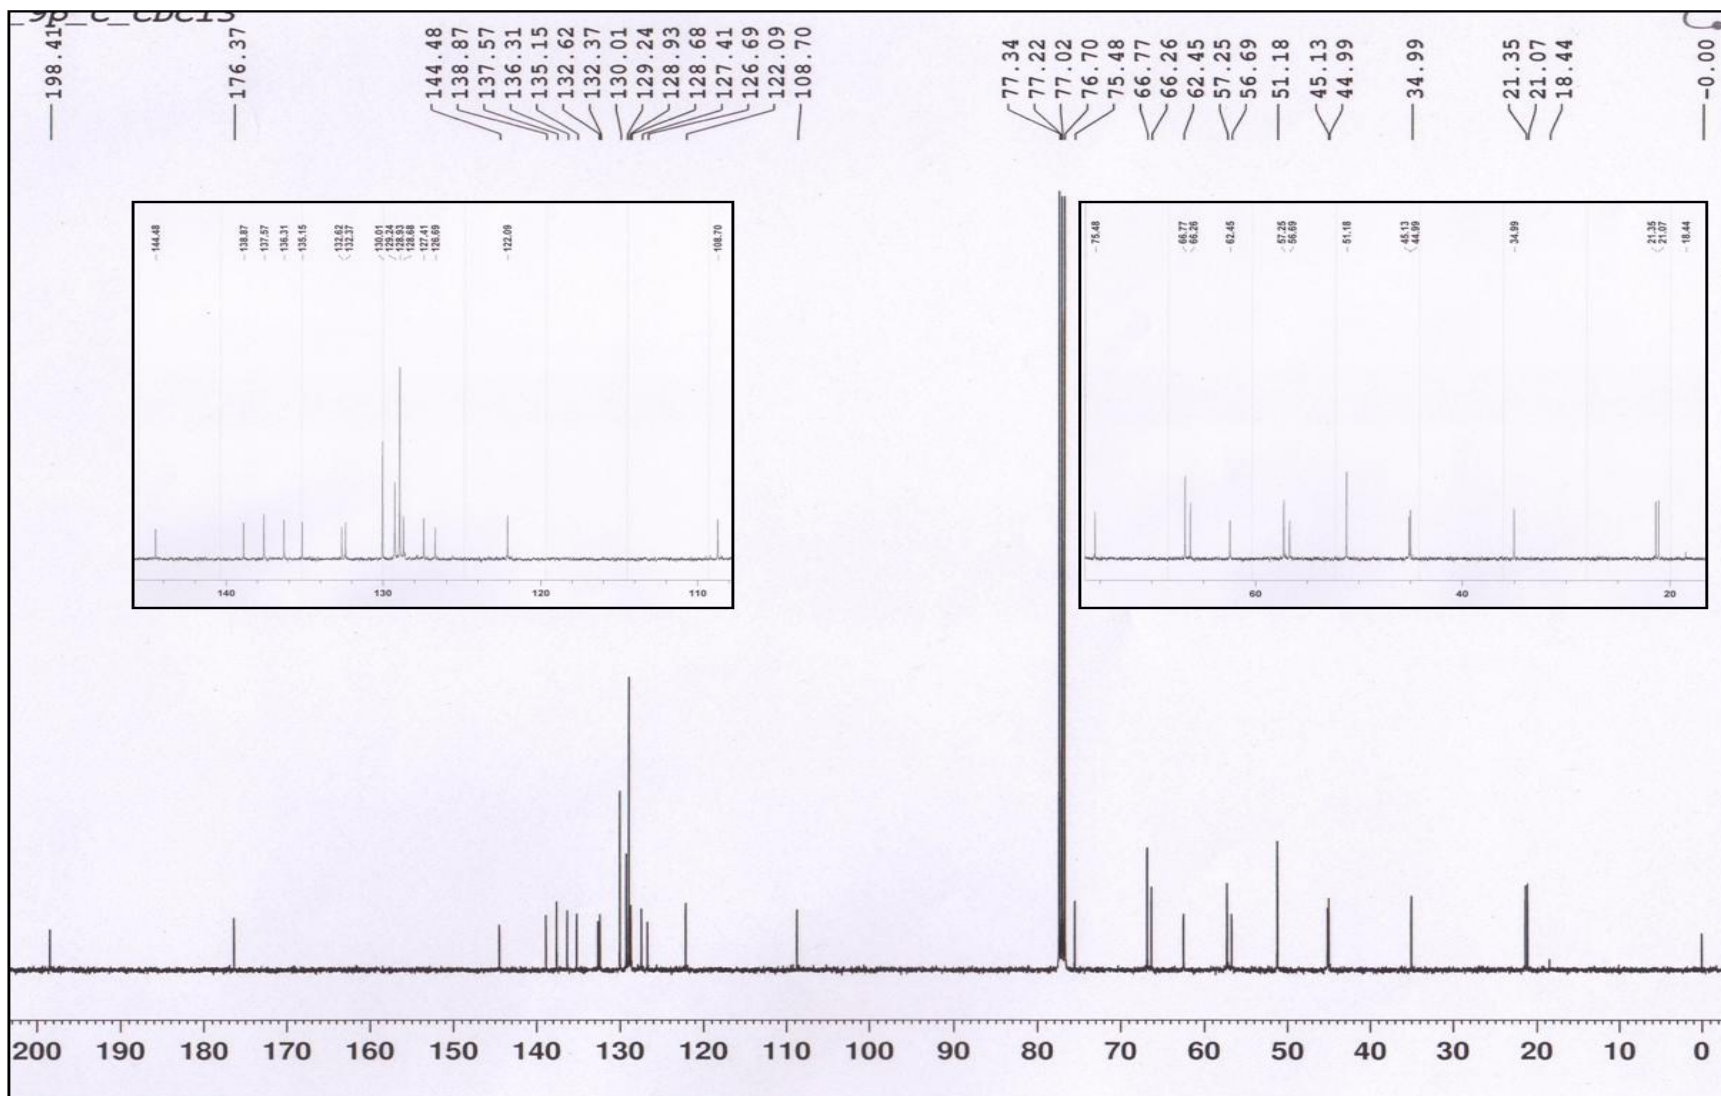

Figure S78.  $^{13}\text{C}$ -NMR spectrum of compound **53** in  $\text{CDCl}_3$ .

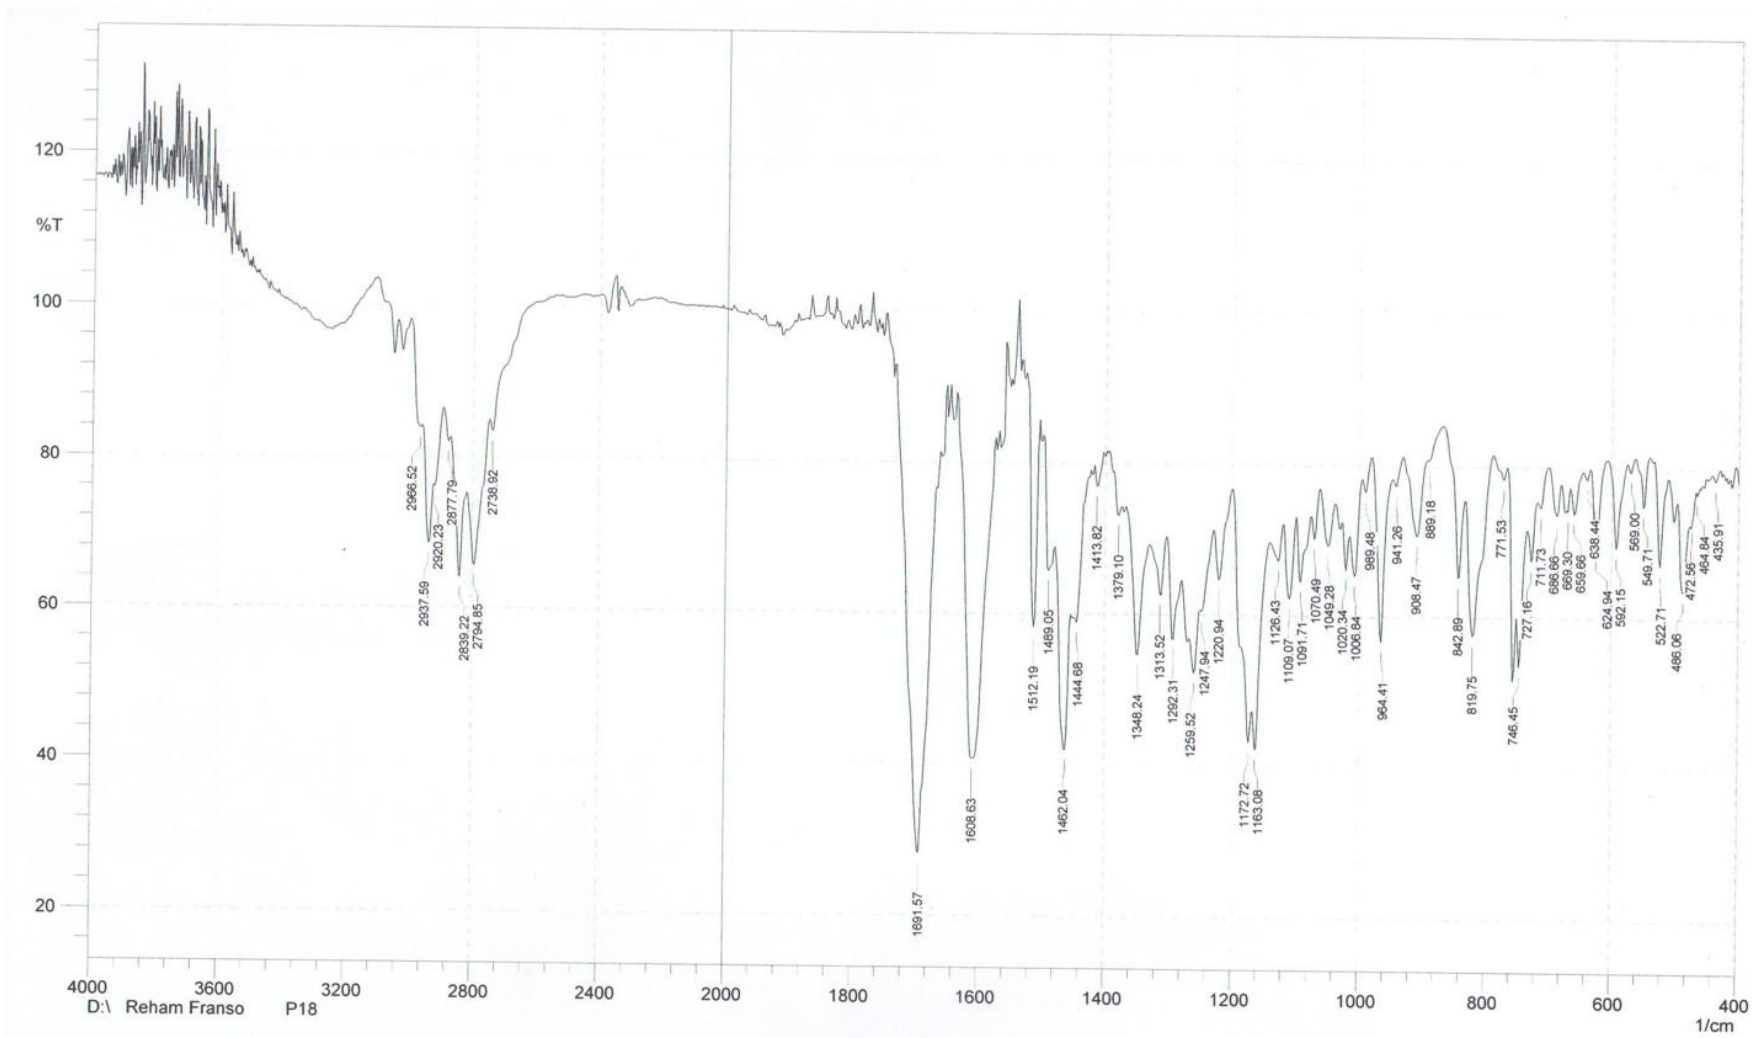

**Figure S79.** IR spectrum of compound **54** (KBr pellet).



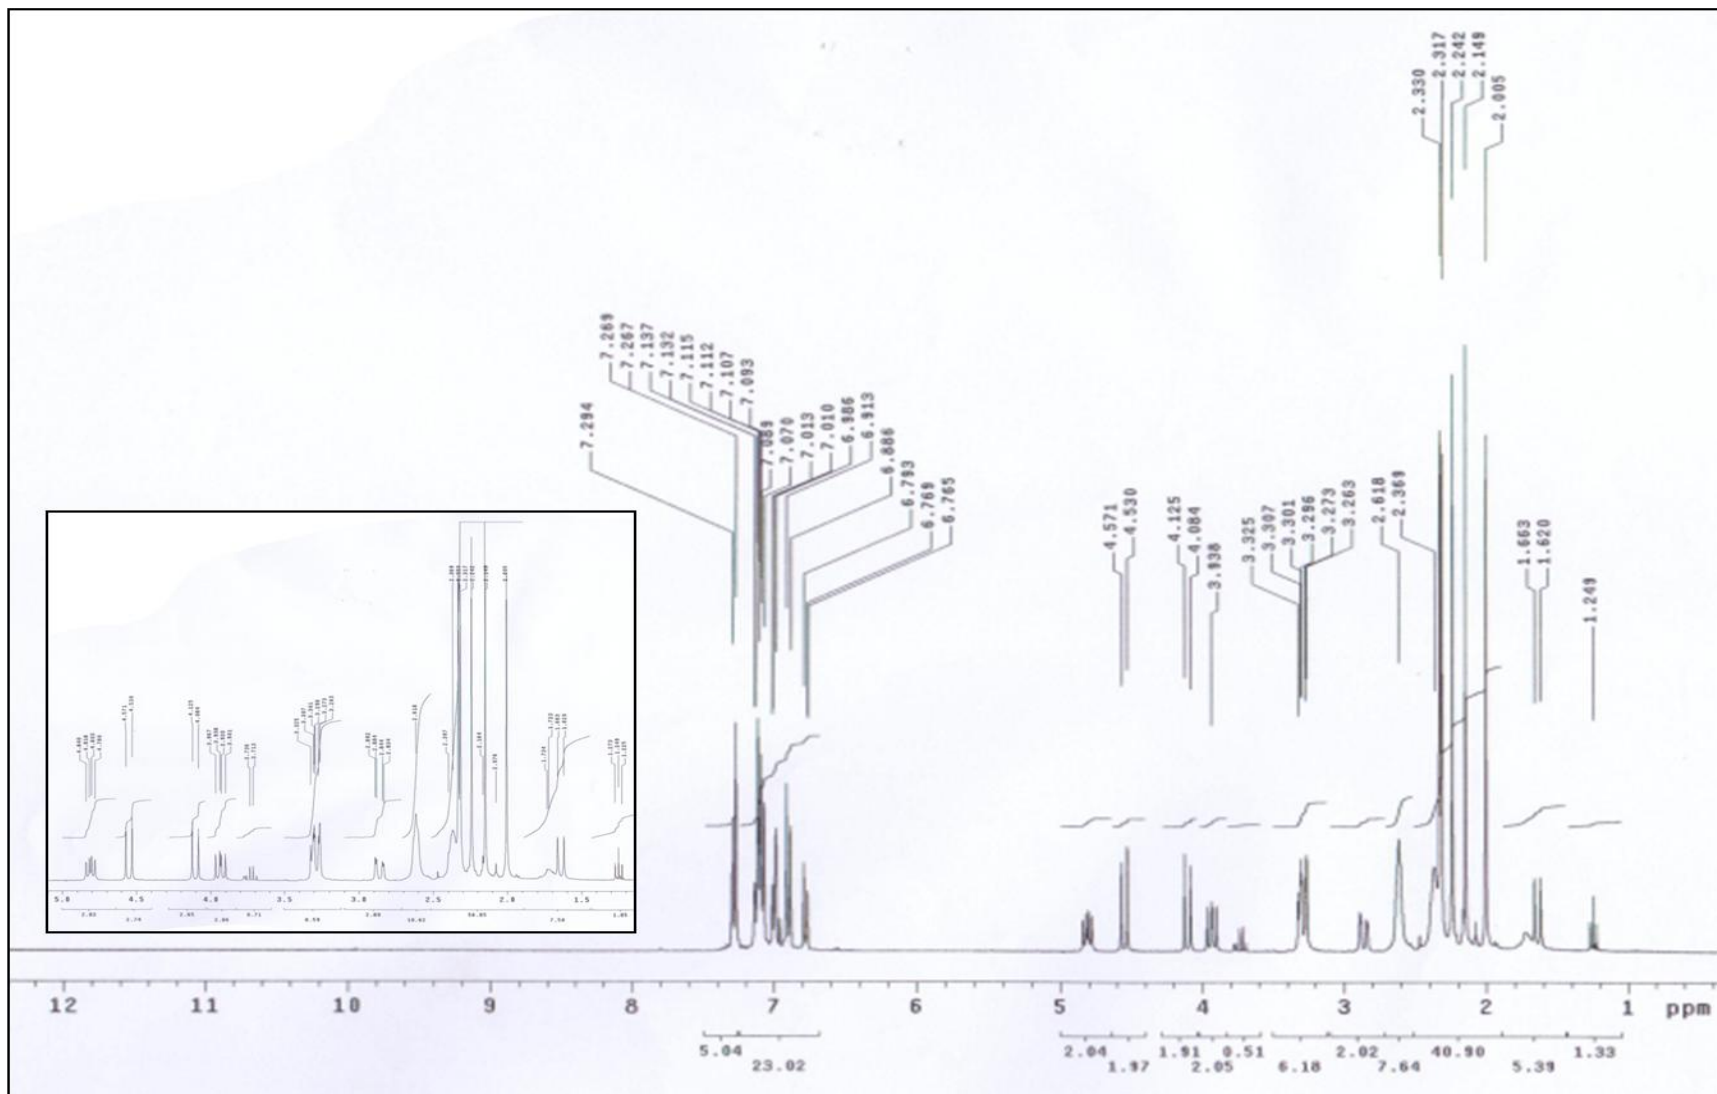

**Figure S80.** <sup>1</sup>H-NMR spectrum of compound **54** in CDCl<sub>3</sub>.

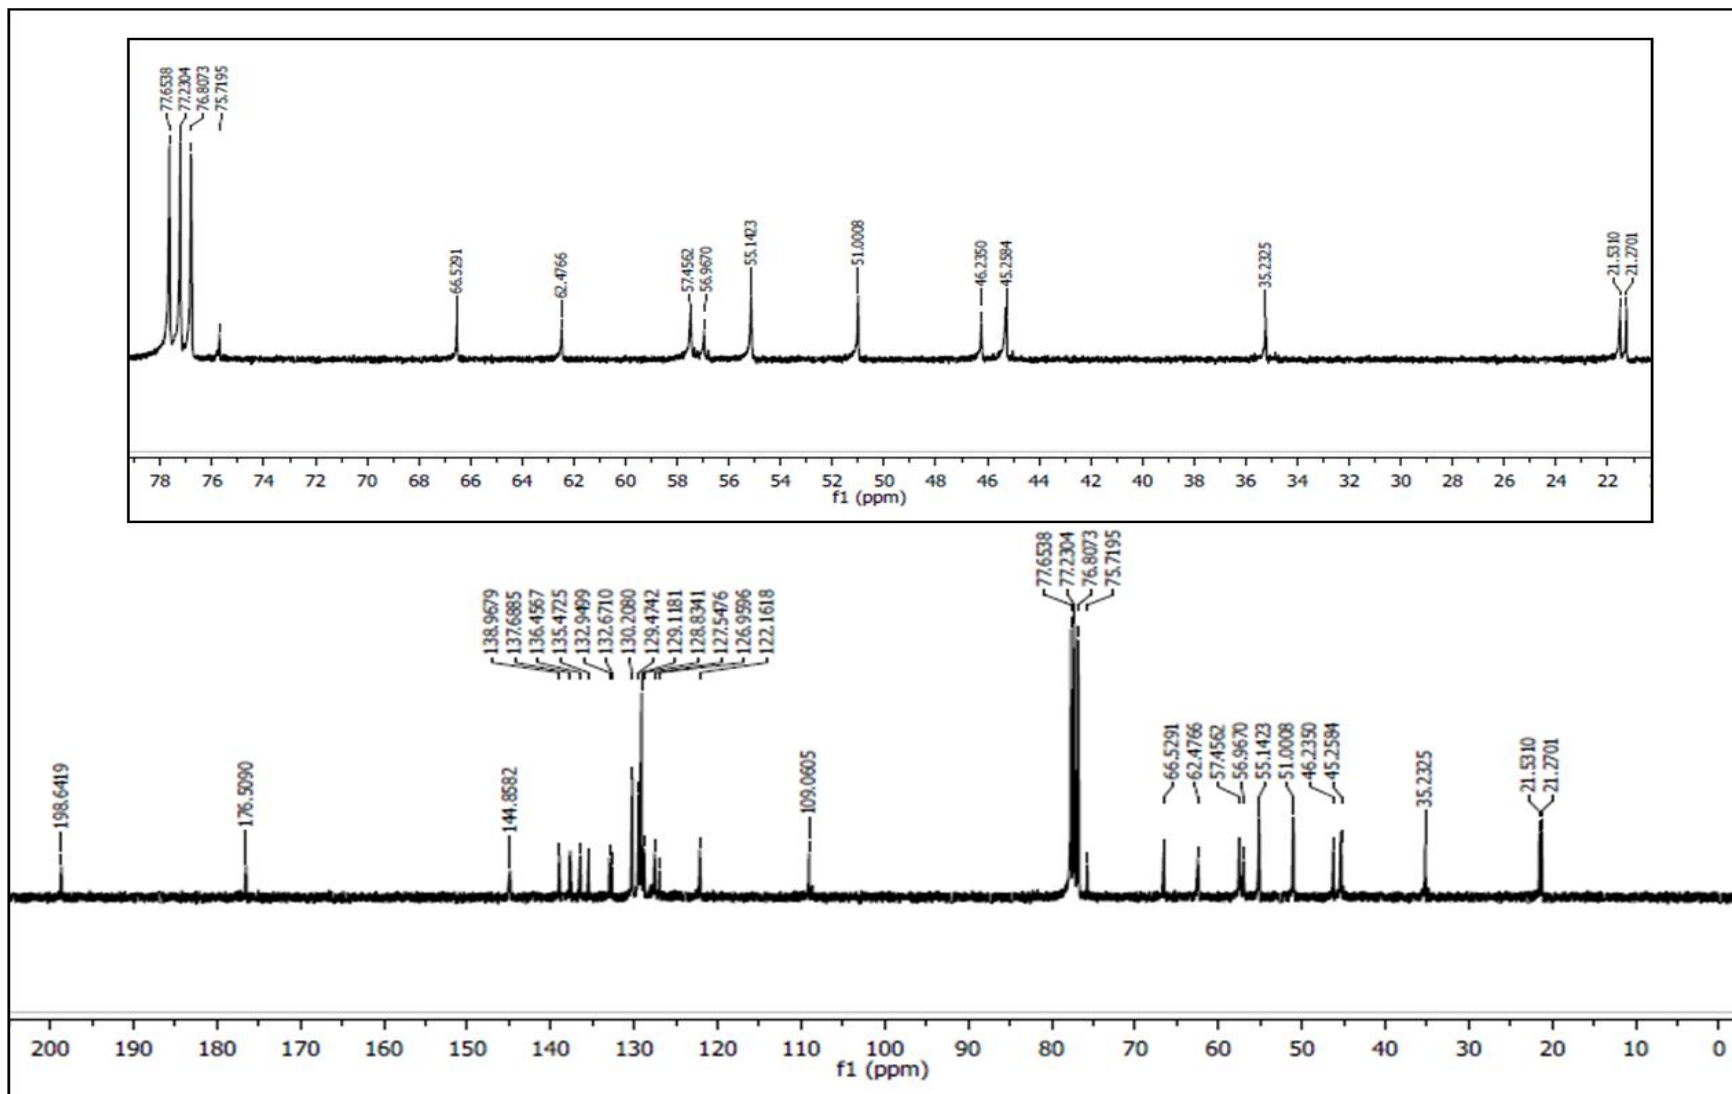

Figure S81.  $^{13}\text{C}$ -NMR spectrum of compound 54 in  $\text{CDCl}_3$ .

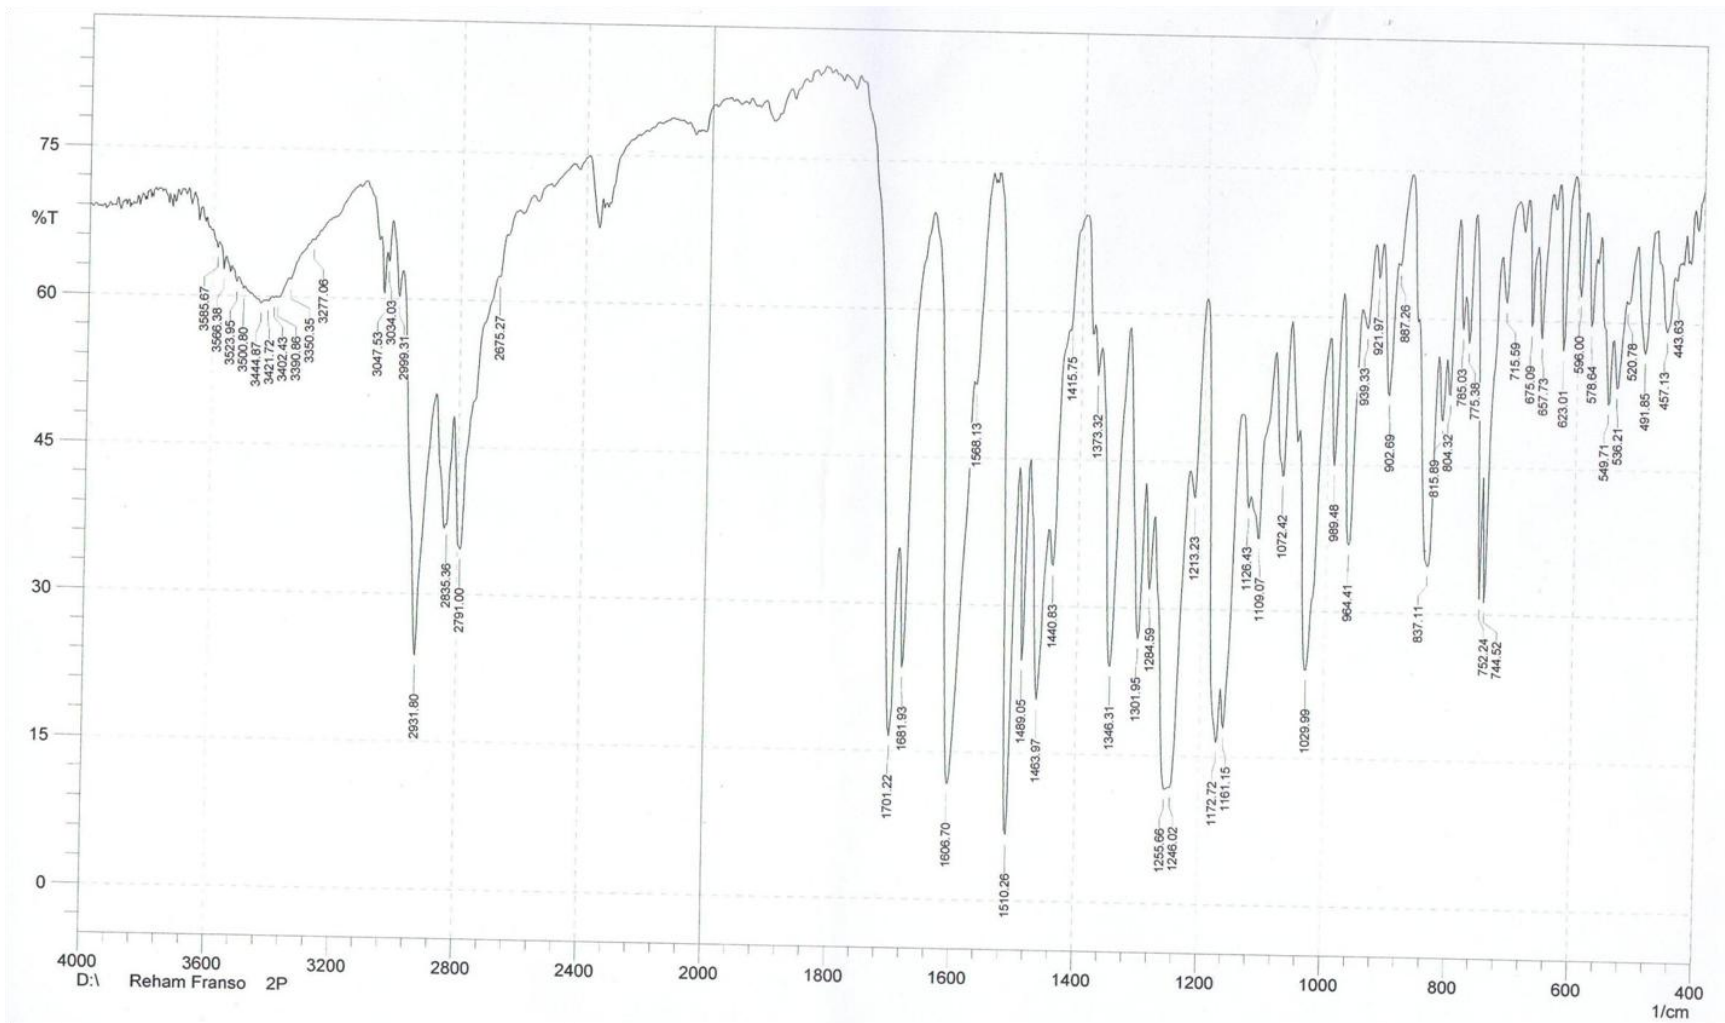

**Figure S82.** IR spectrum of compound **55** (KBr pellet).

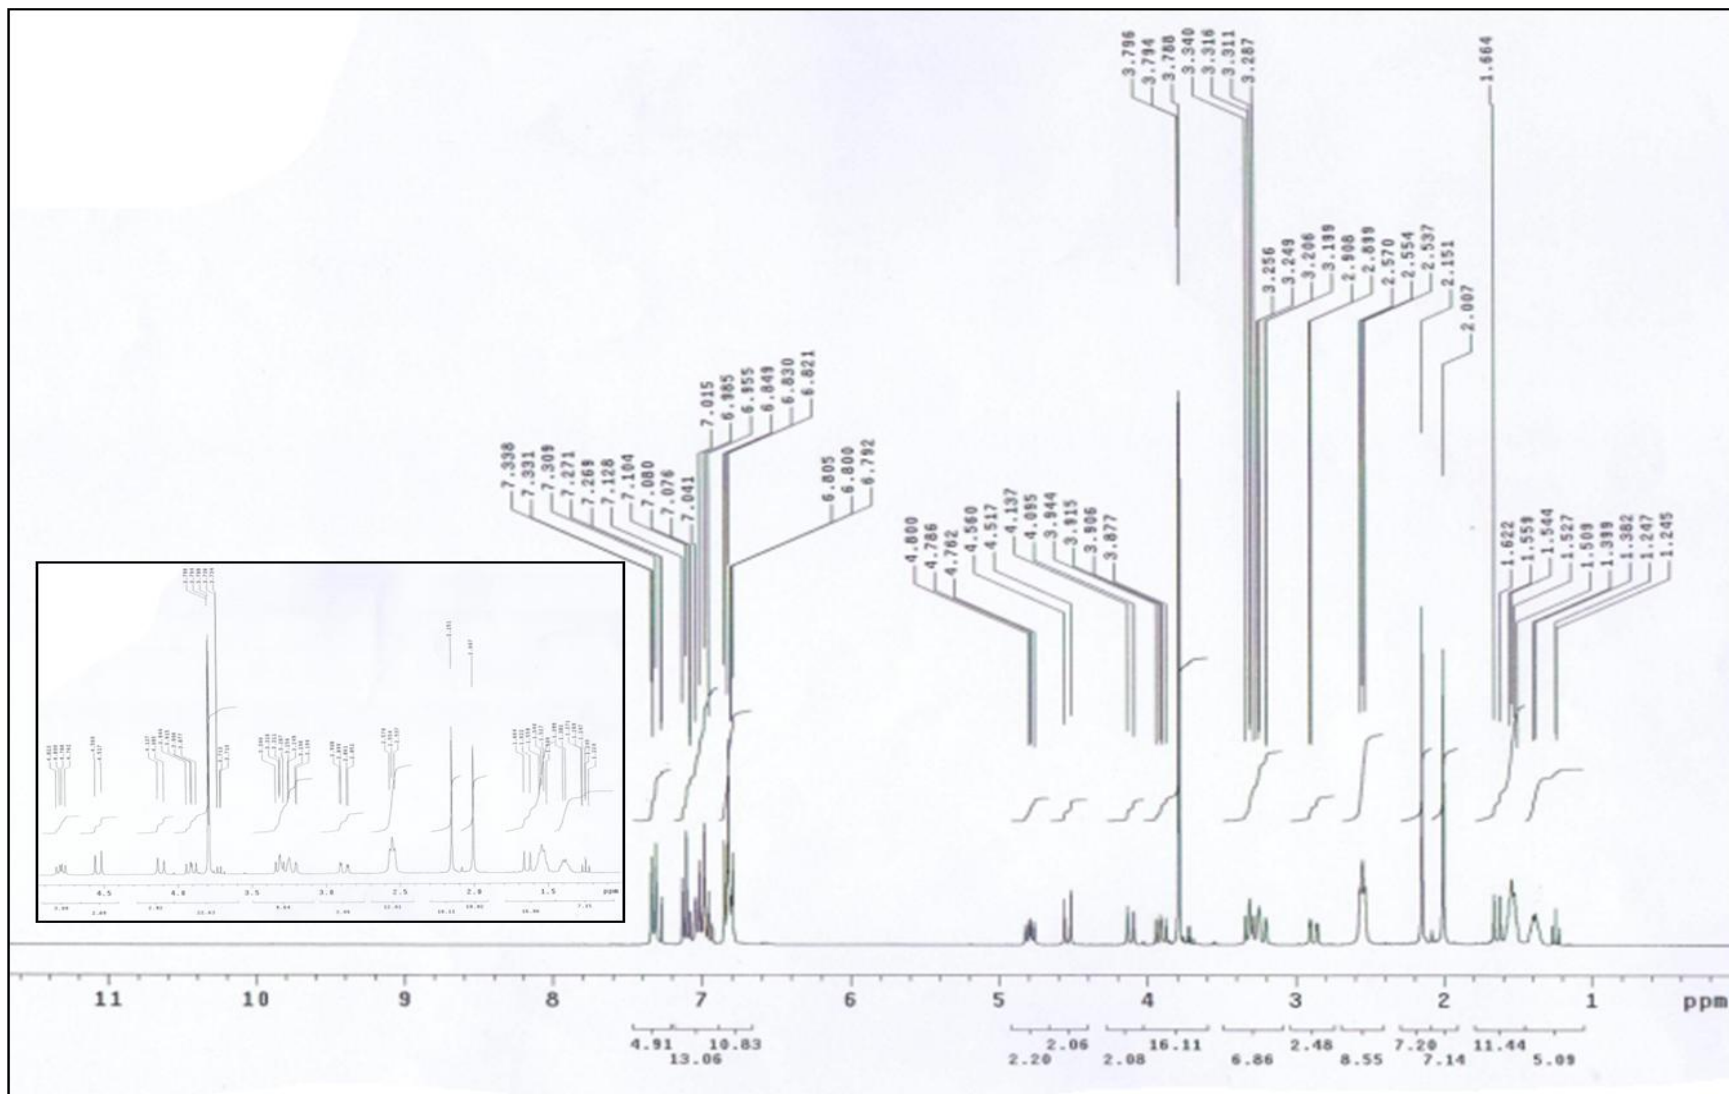

Figure S83. <sup>1</sup>H-NMR spectrum of compound 55 in CDCl<sub>3</sub>.

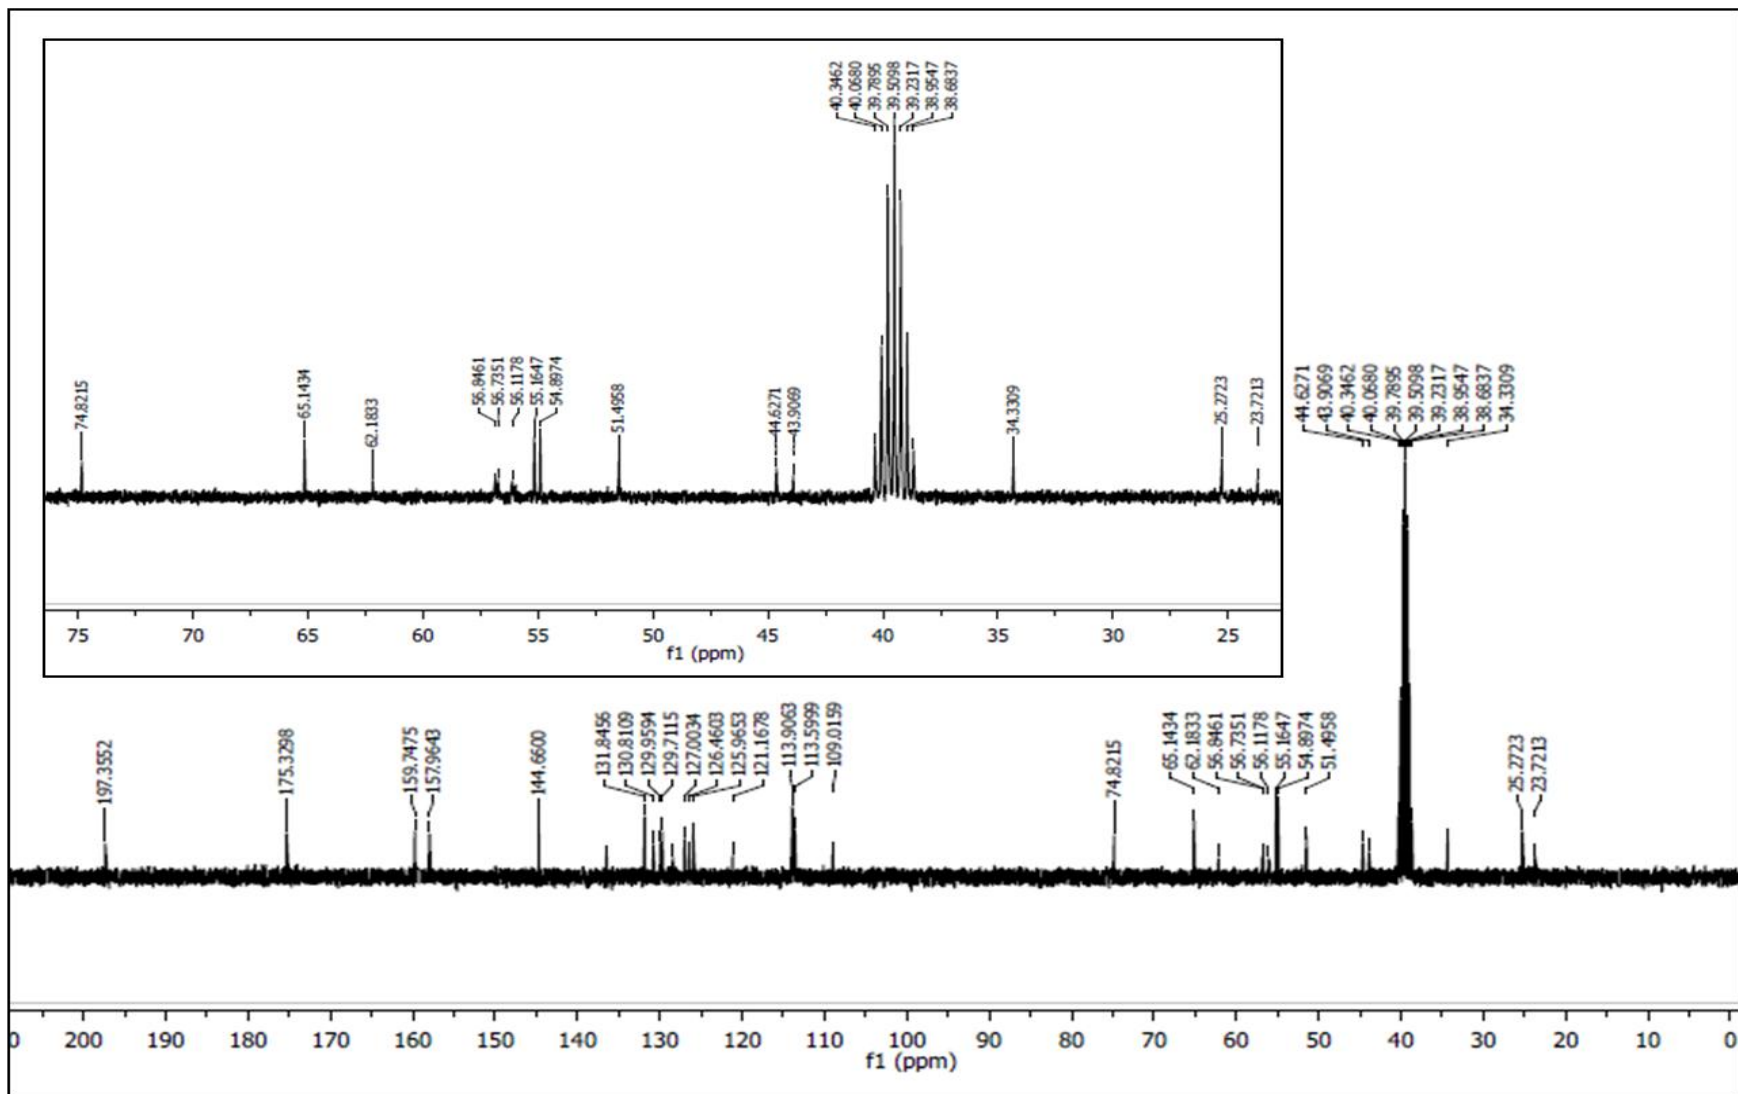

Figure S84.  $^{13}\text{C}$ -NMR spectrum of compound **55** in  $\text{DMSO-}d_6$ .

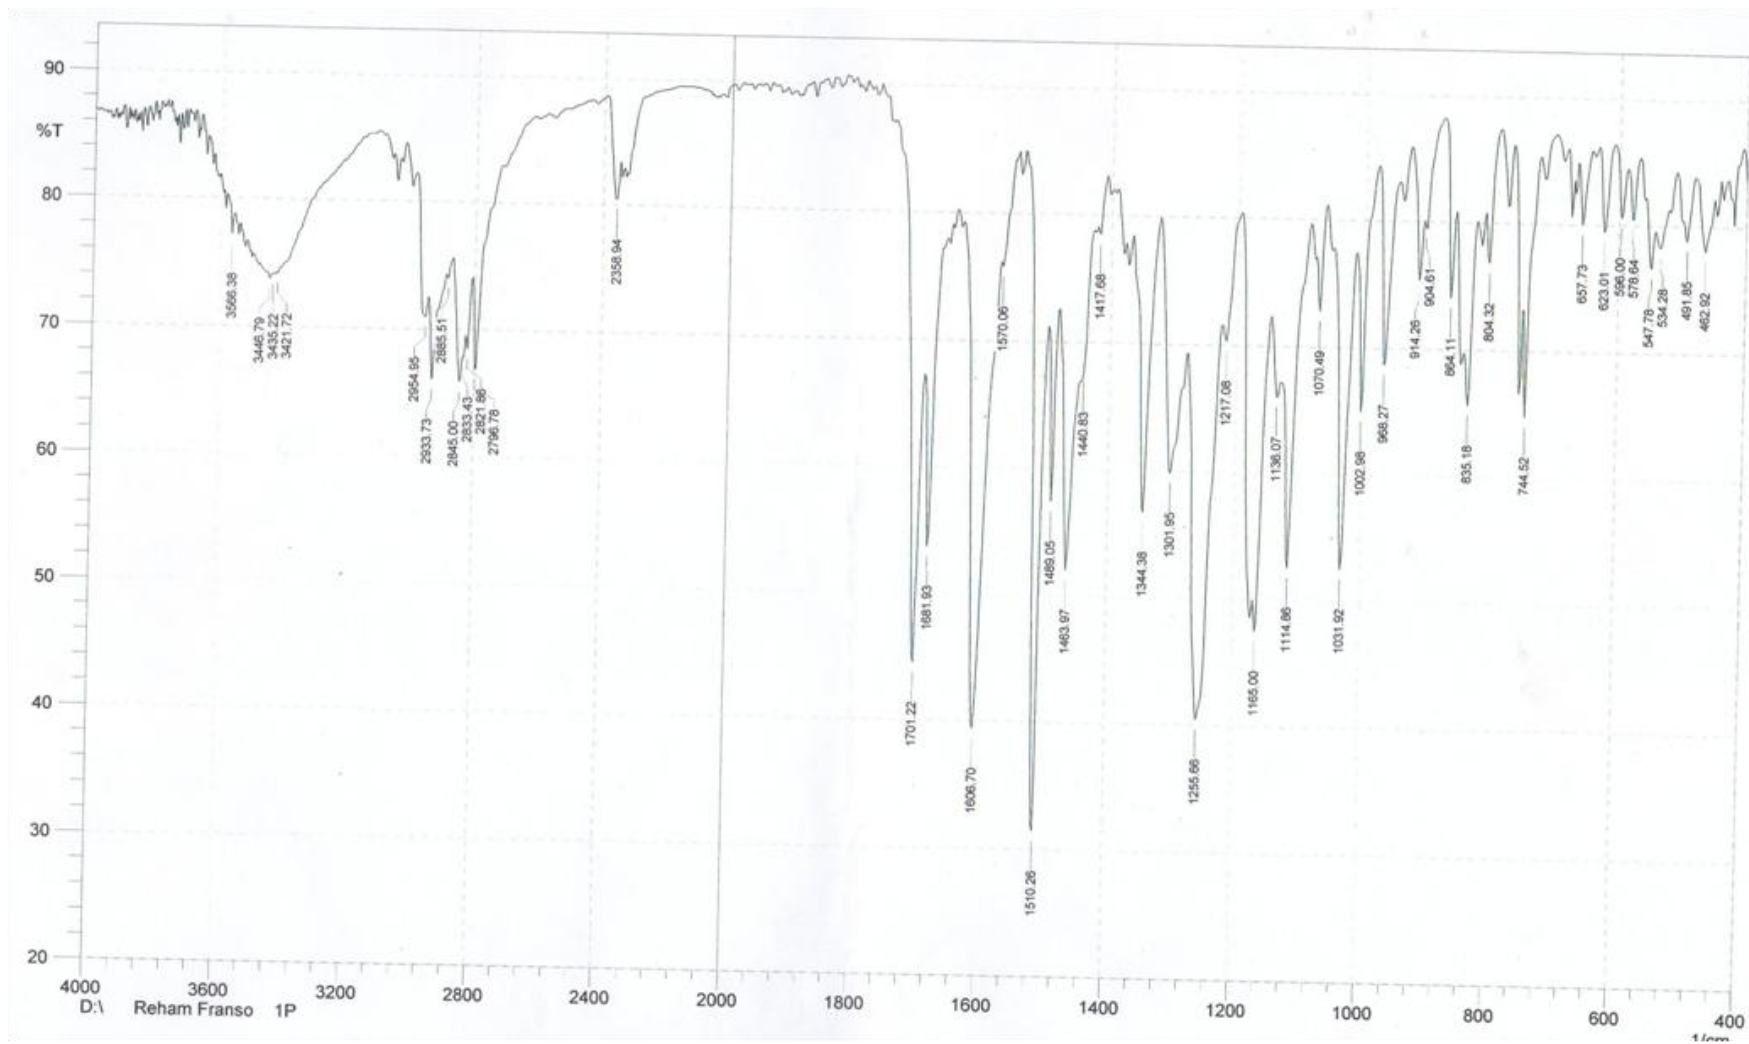

Figure S85. IR spectrum of compound 56 (KBr pellet).

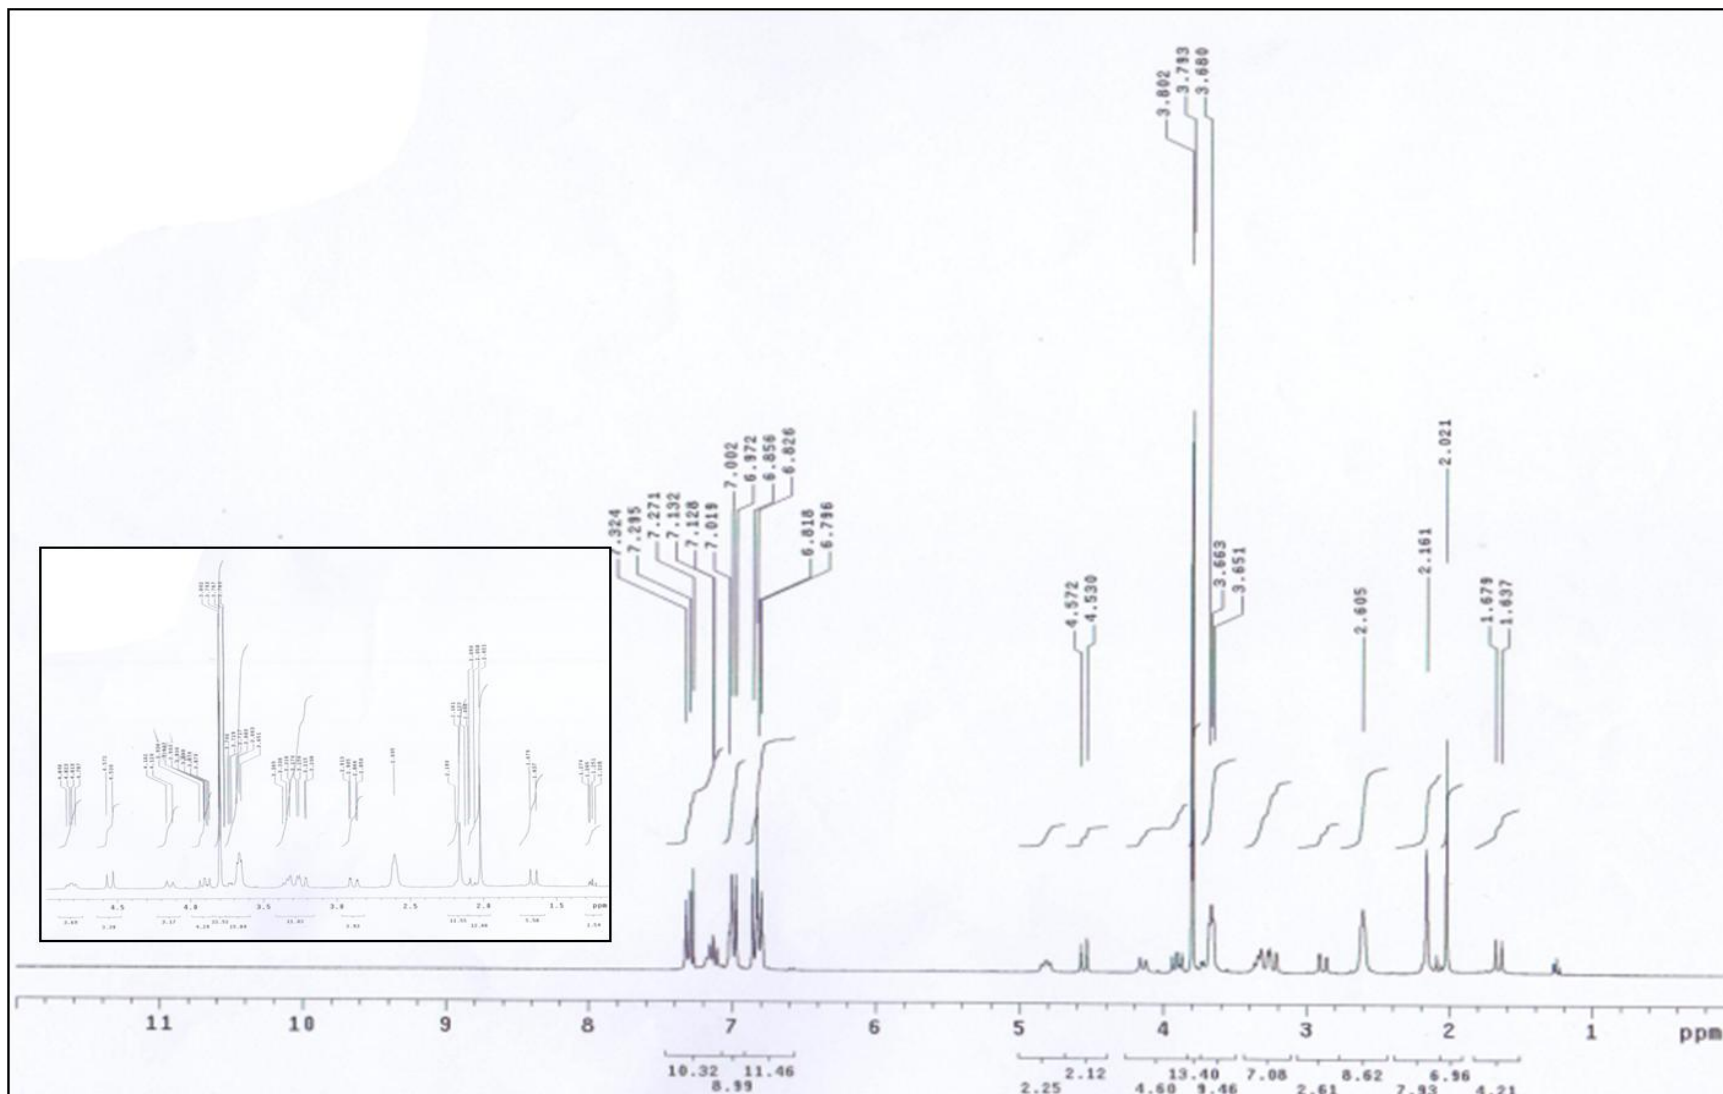

**Figure S86.**  $^1\text{H-NMR}$  spectrum of compound **56** in  $\text{CDCl}_3$ .

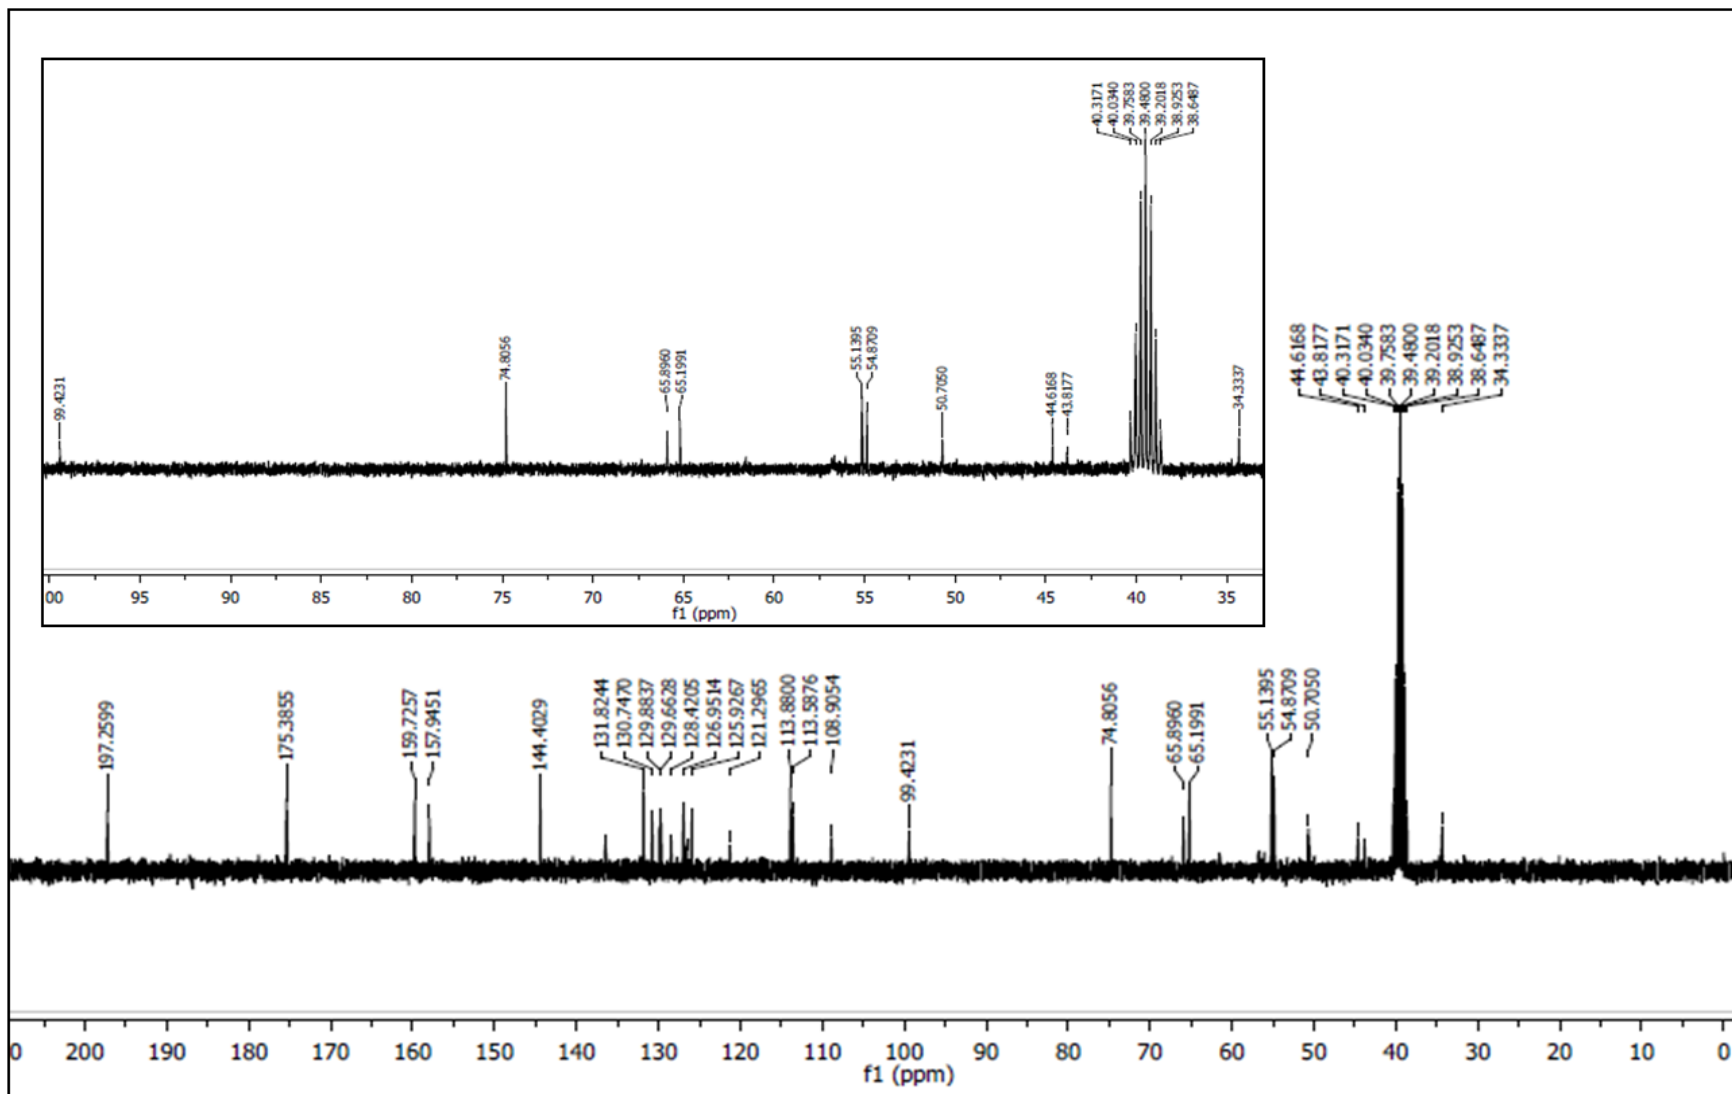

Figure S87.  $^{13}\text{C}$ -NMR spectrum of compound **56** in  $\text{DMSO-}d_6$ .



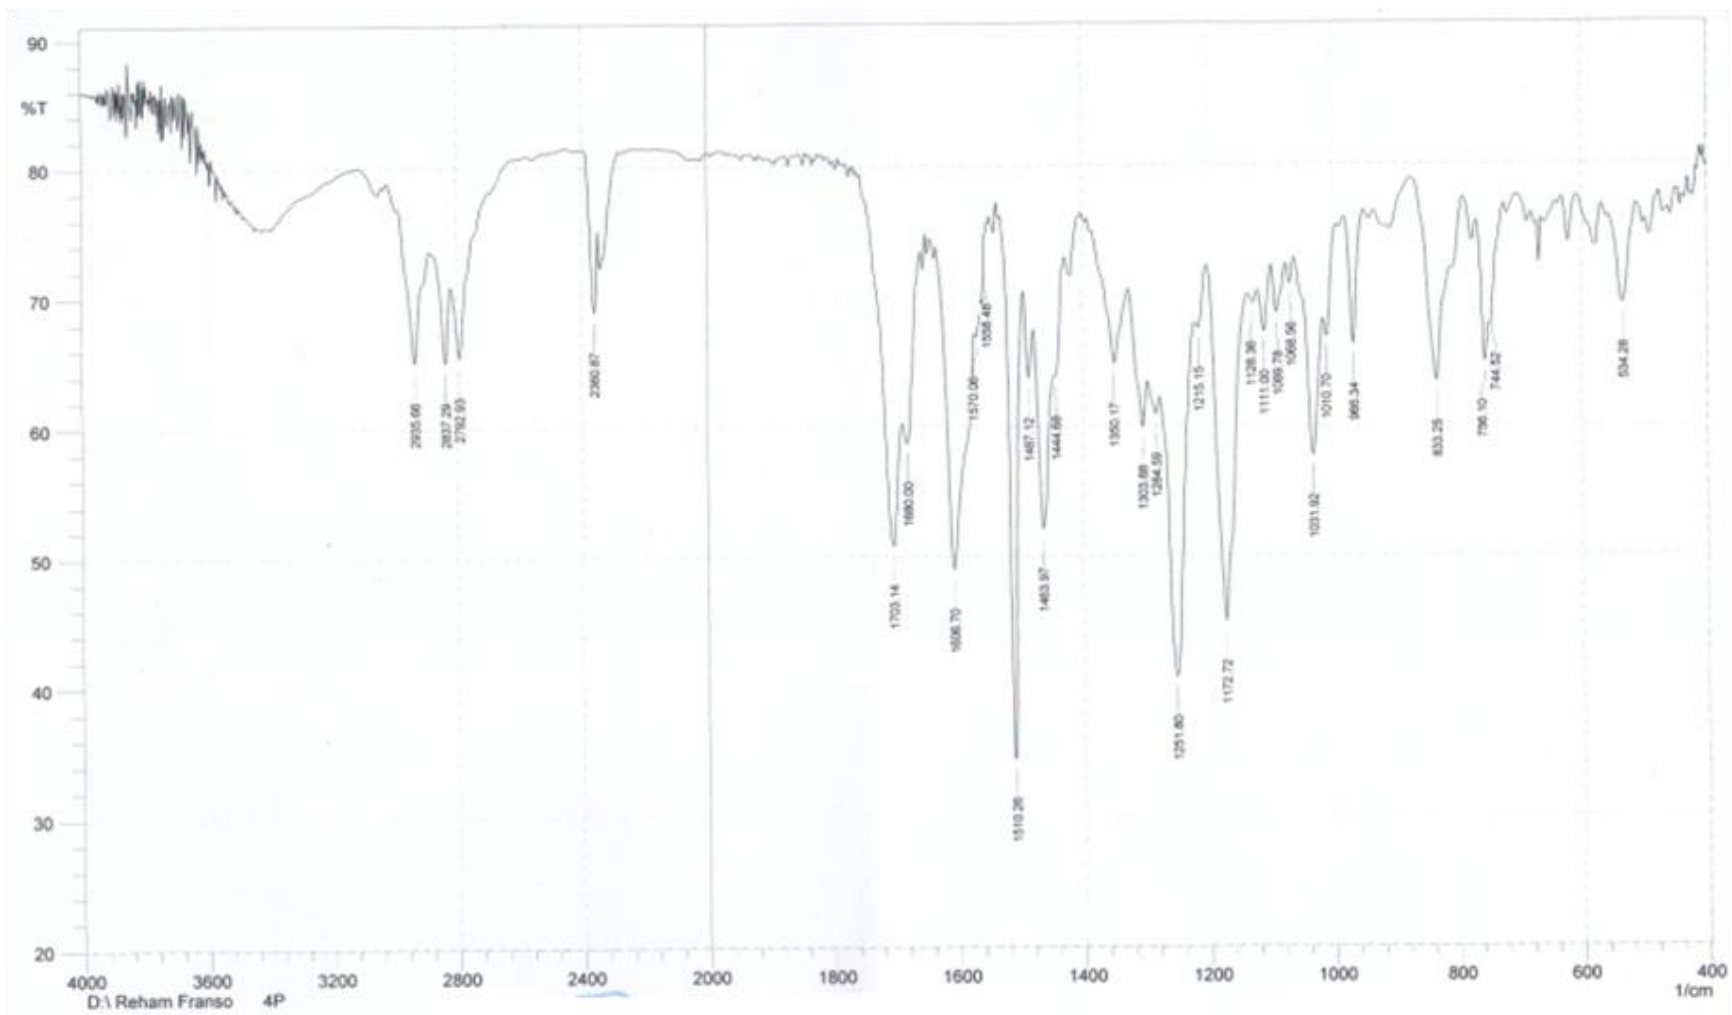

**Figure S88.** IR spectrum of compound **57** (KBr pellet).

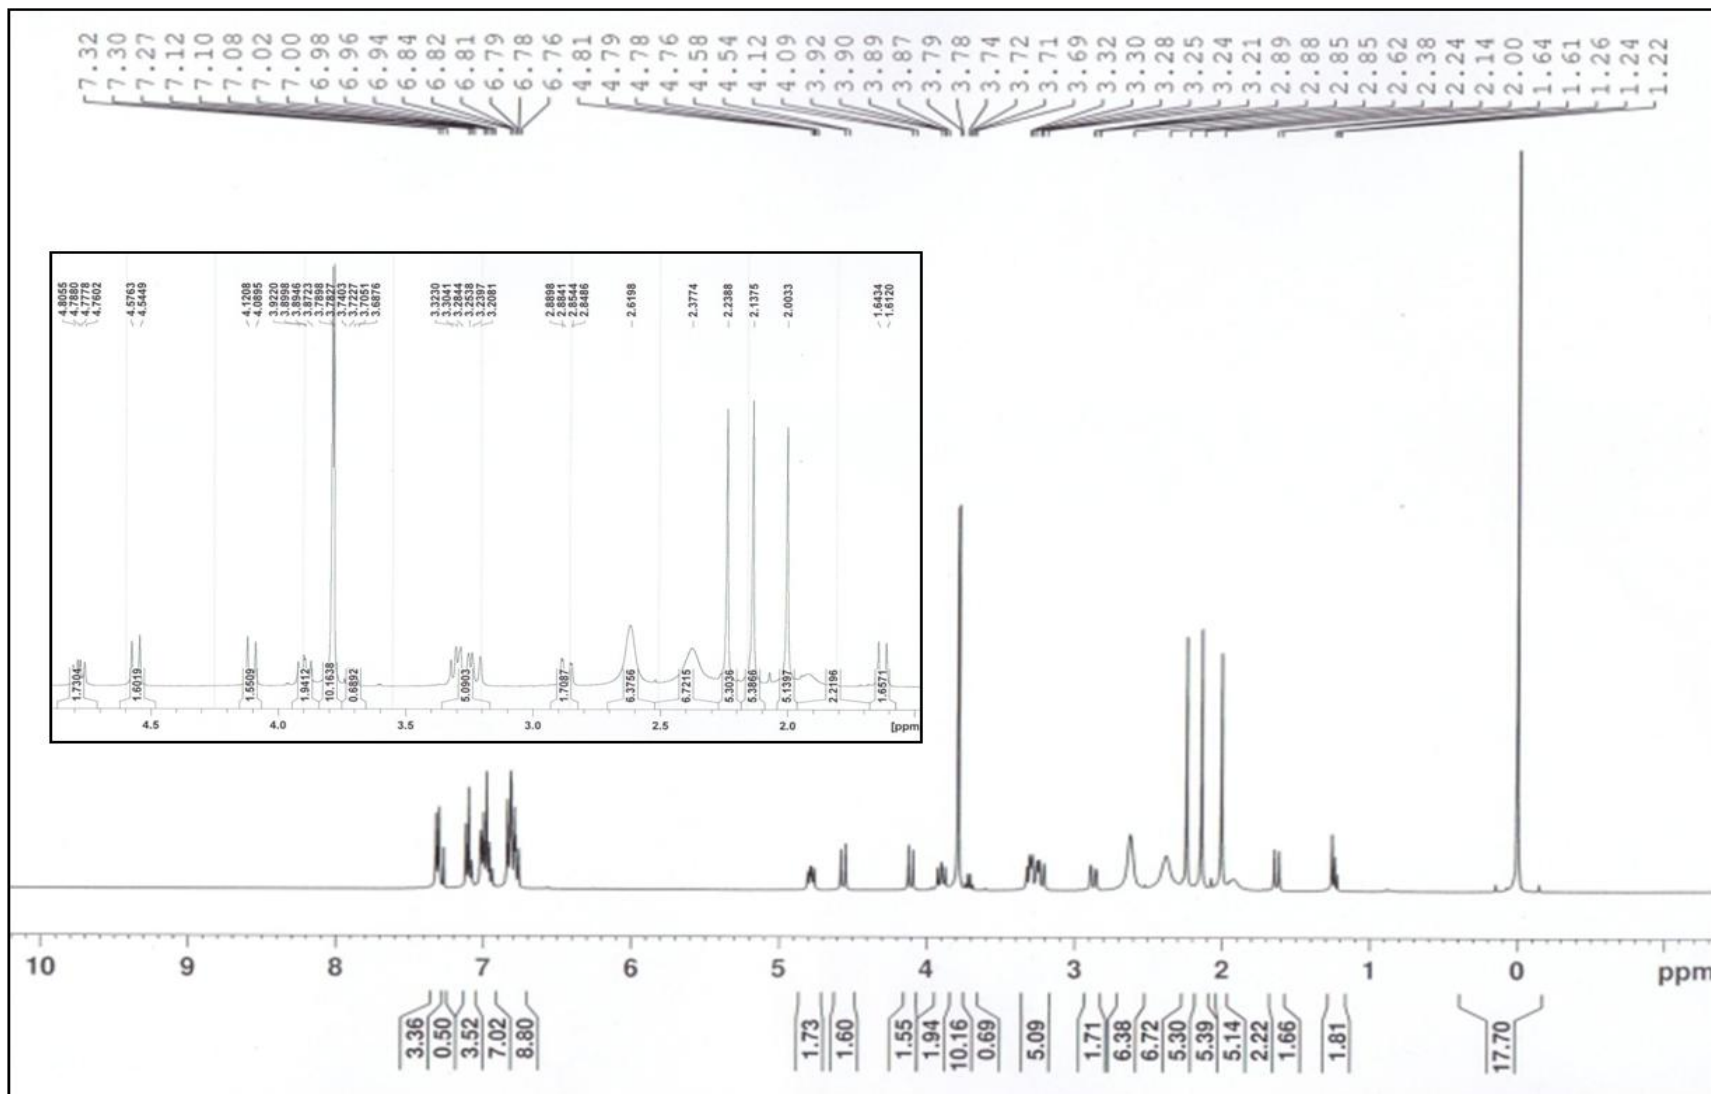

Figure S89.  $^1\text{H-NMR}$  spectrum of compound **57** in  $\text{CDCl}_3$ .

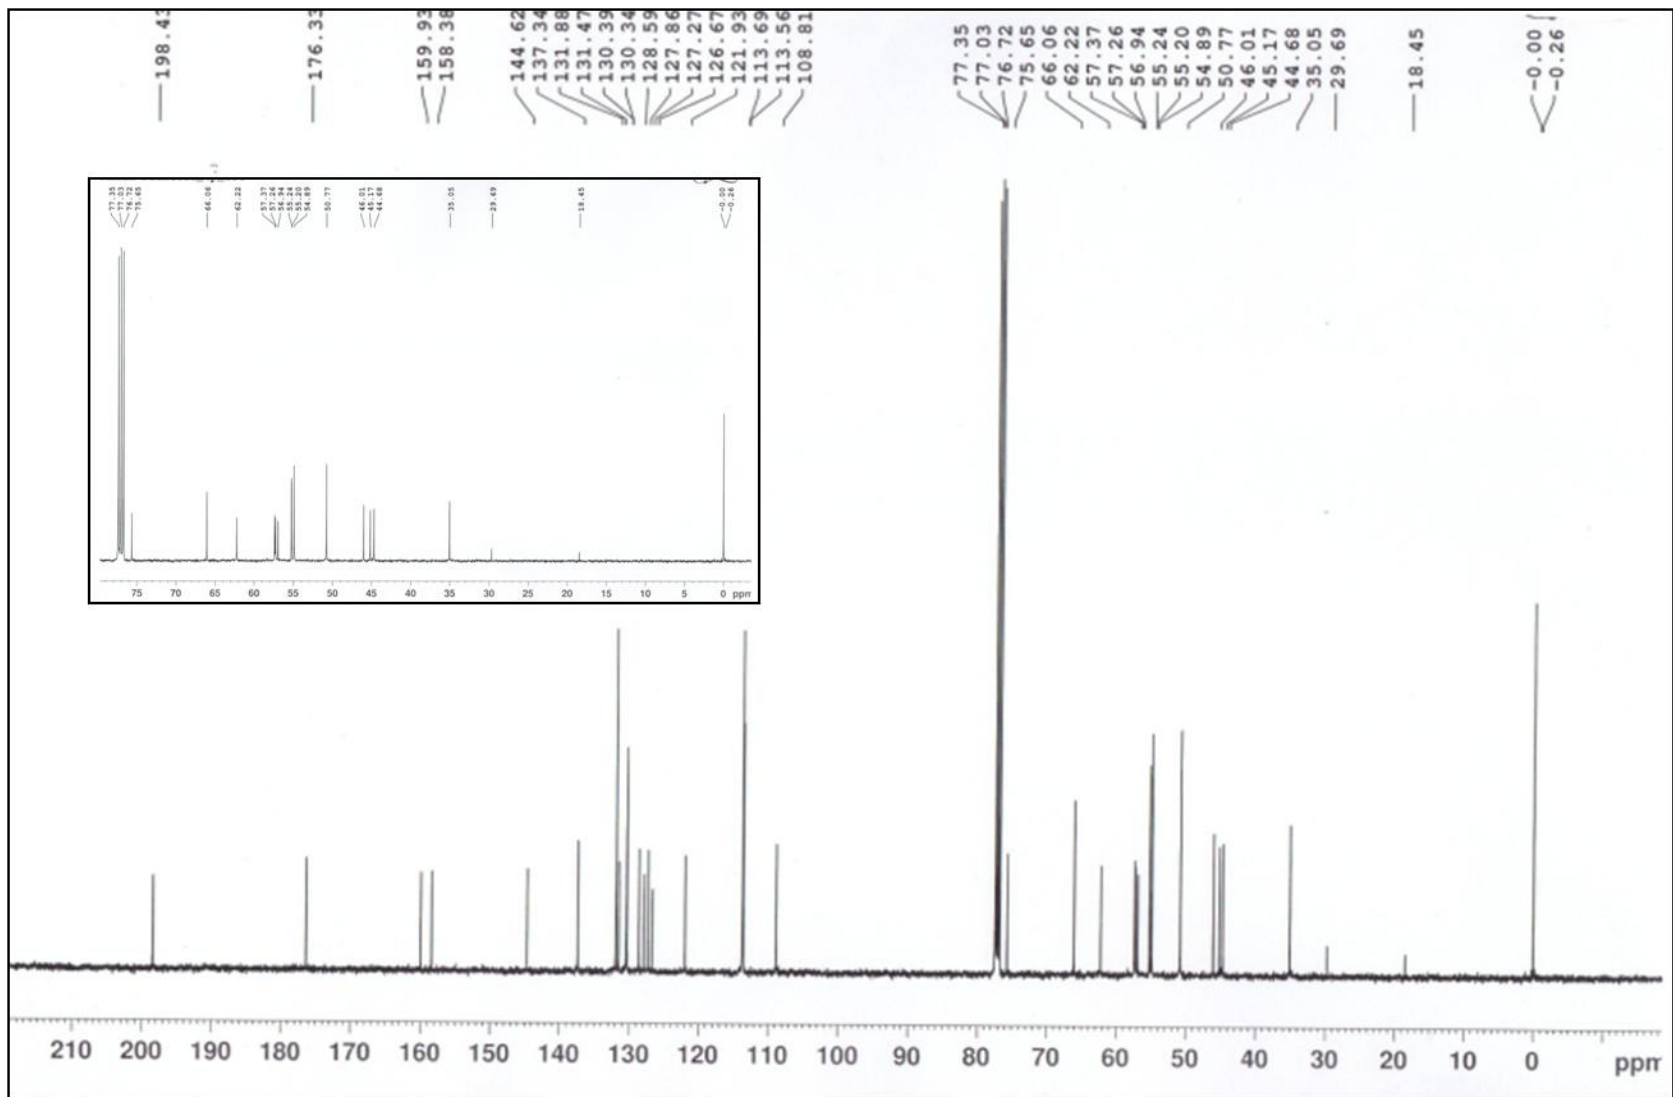

Figure S90.  $^{13}\text{C}$ -NMR spectrum of compound **57** in  $\text{CDCl}_3$ .

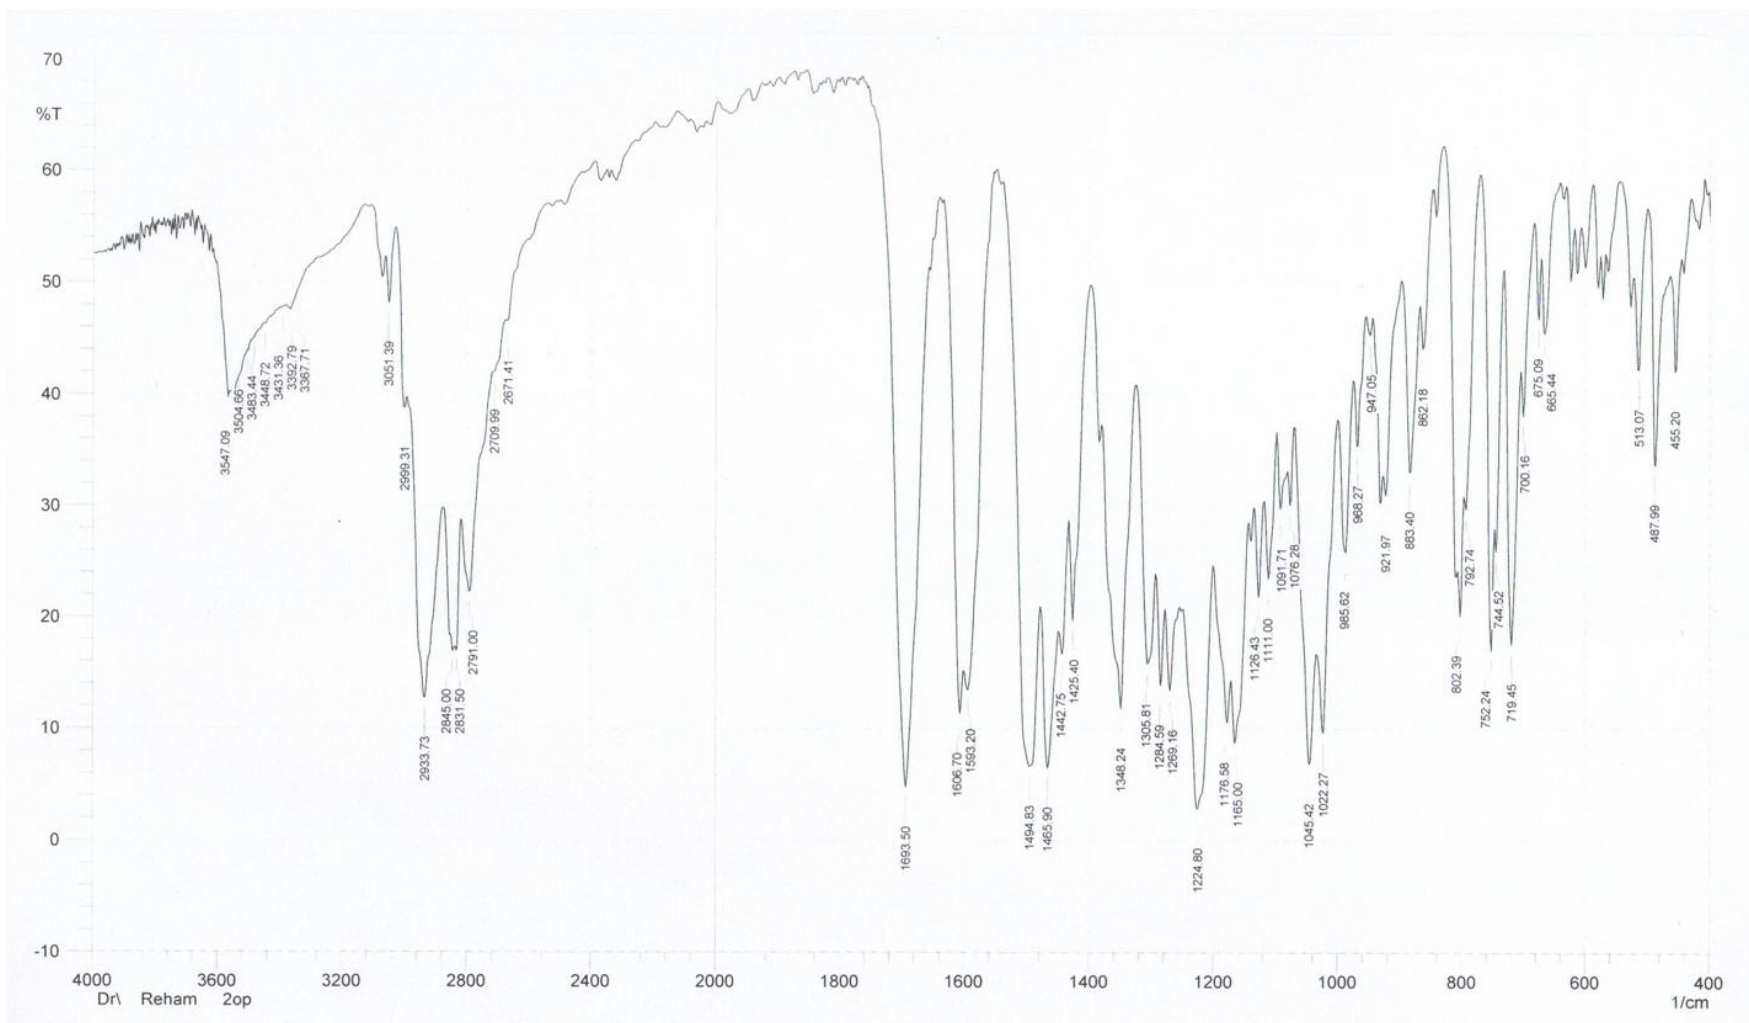

Figure S91. IR spectrum of compound 58 (KBr pellet).

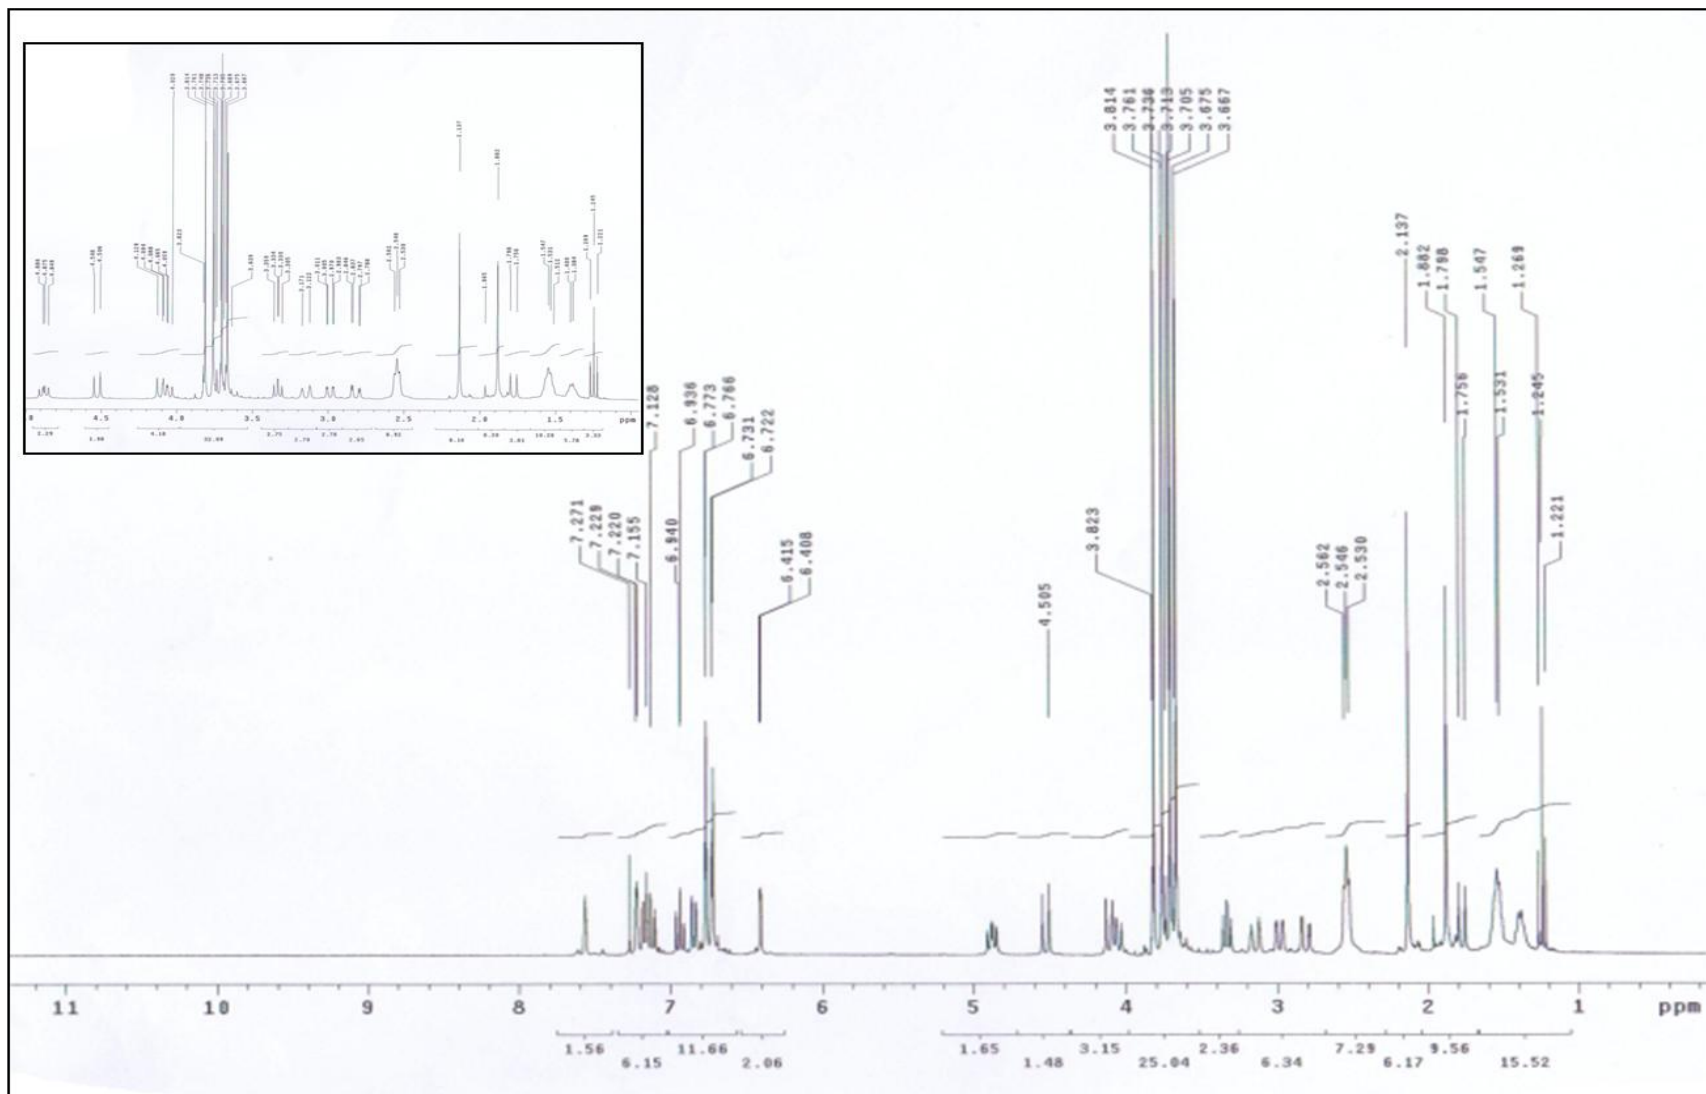

**Figure S92.** <sup>1</sup>H-NMR spectrum of compound **58** in CDCl<sub>3</sub>.

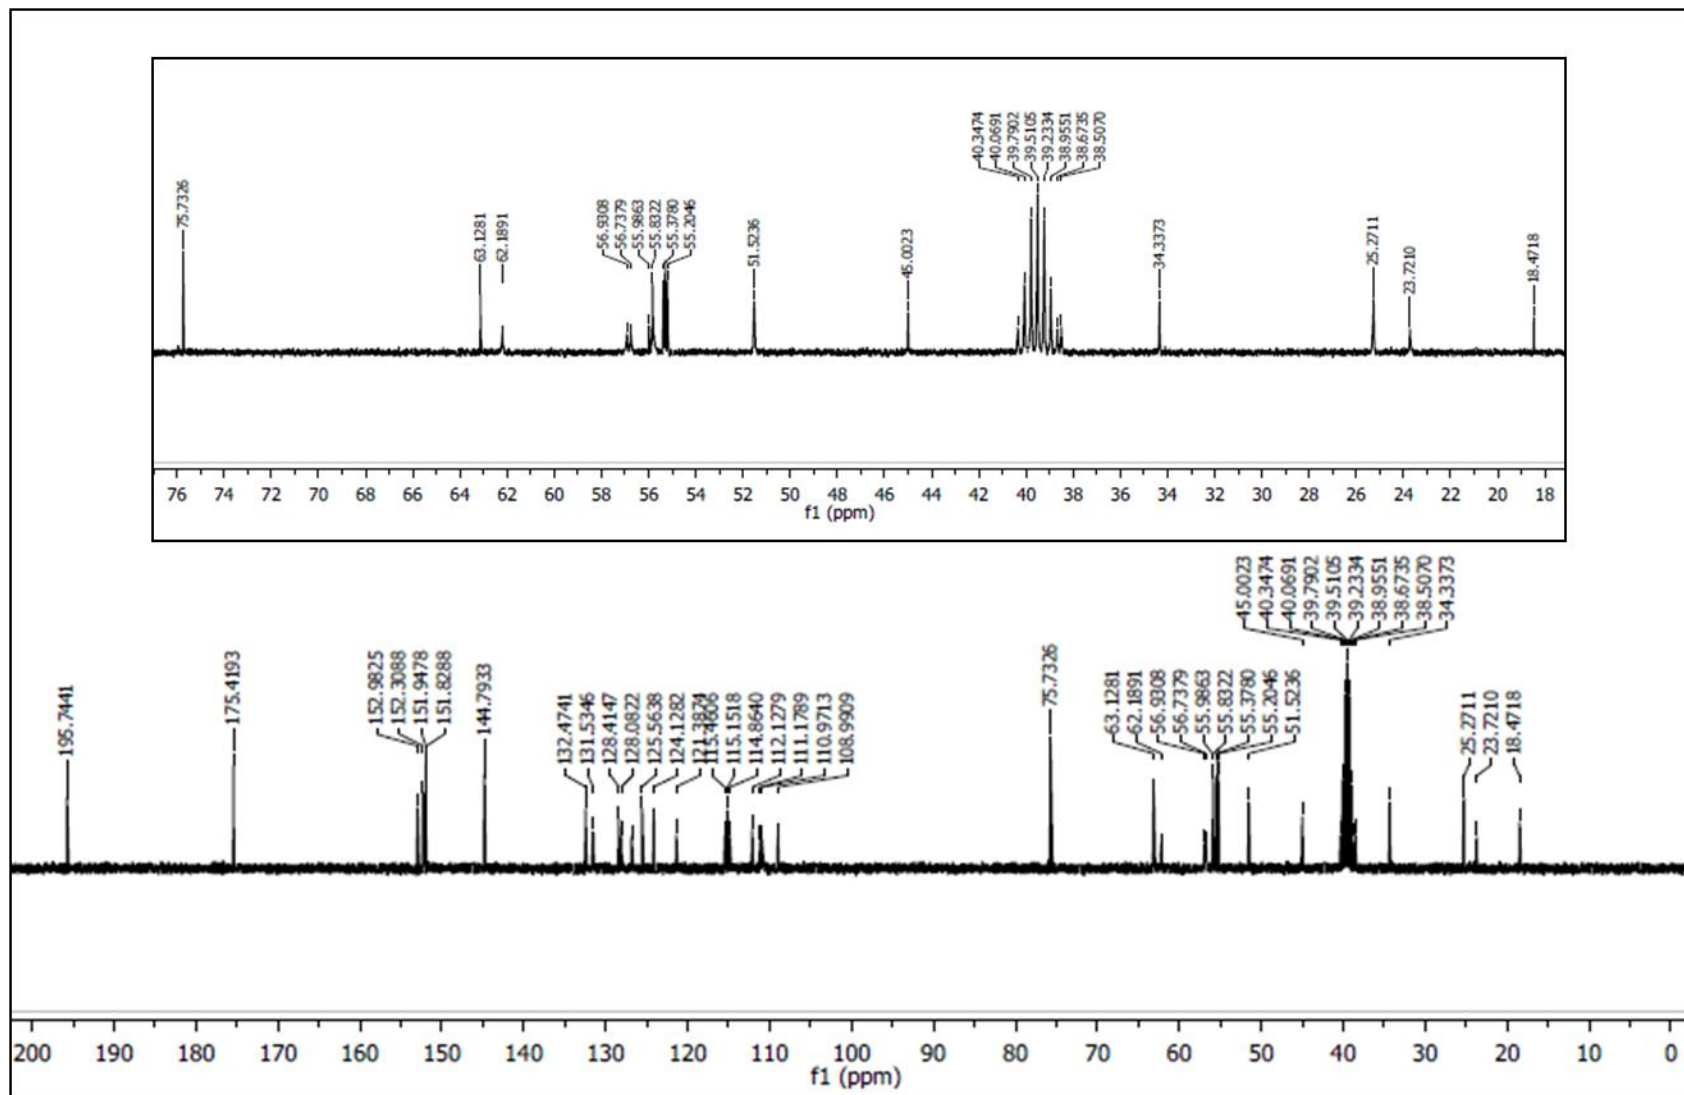

Figure S93. <sup>13</sup>C-NMR spectrum of compound 58 in DMSO-*d*<sub>6</sub>.

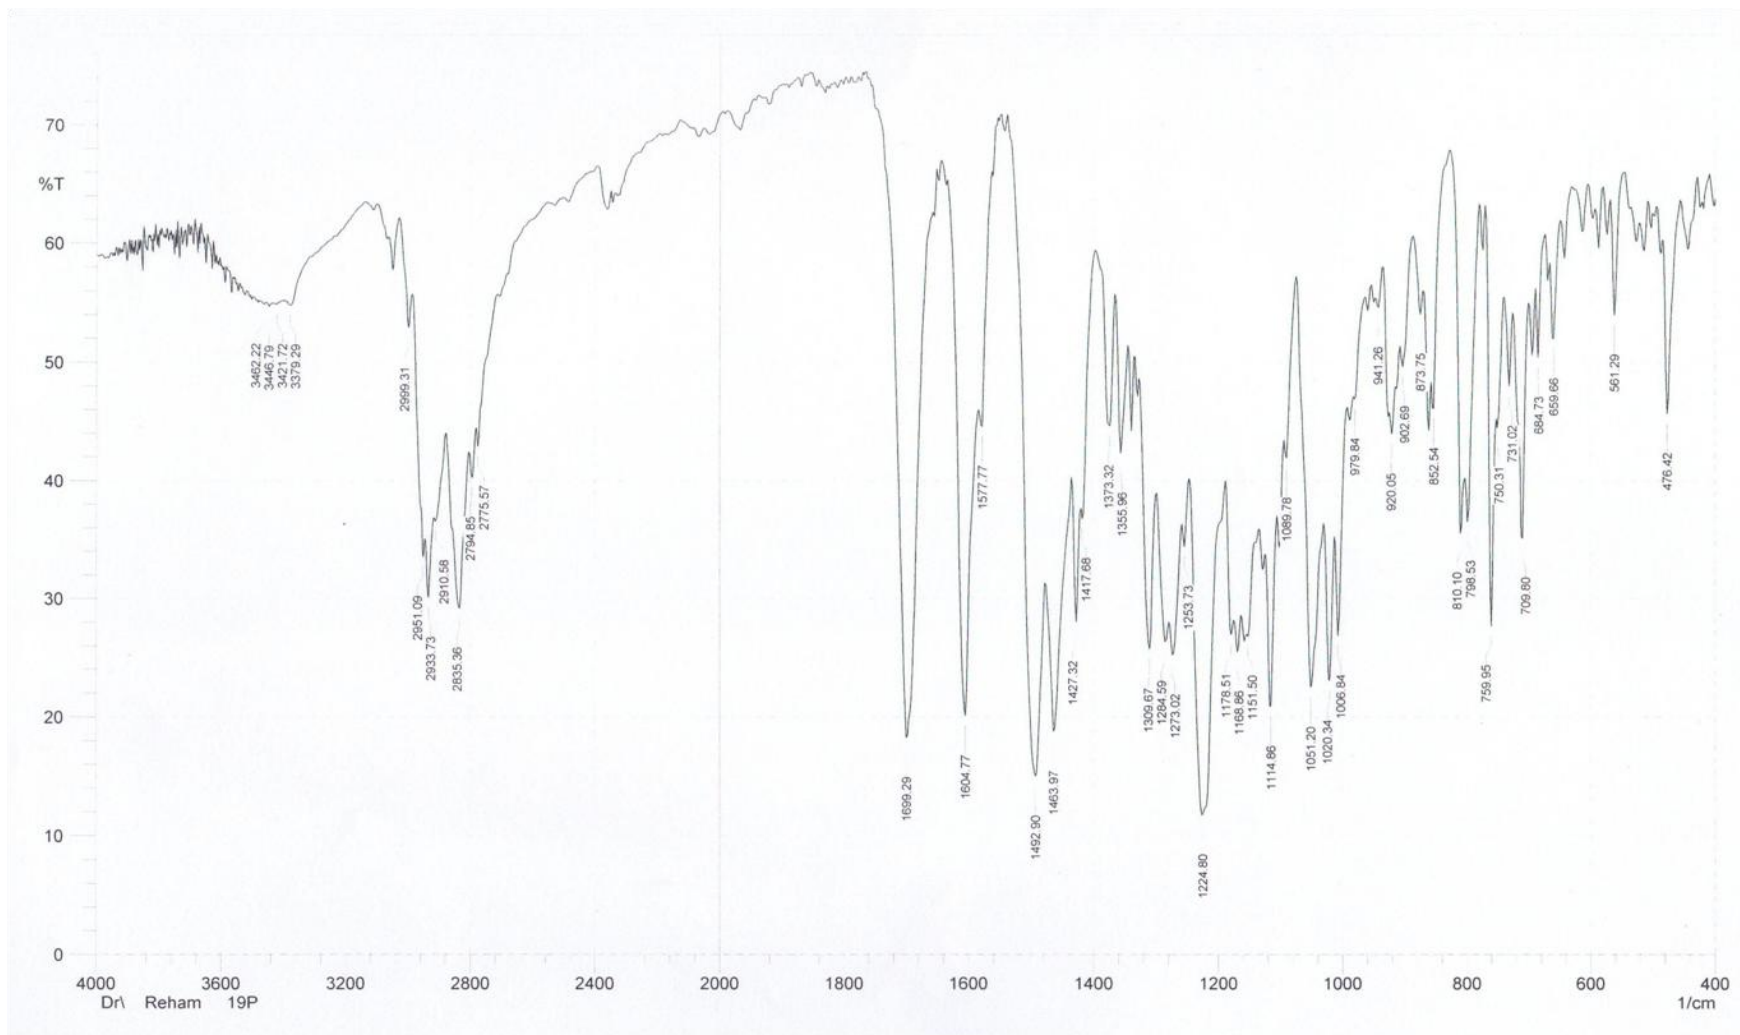

**Figure S94.** IR spectrum of compound **59** (KBr pellet).

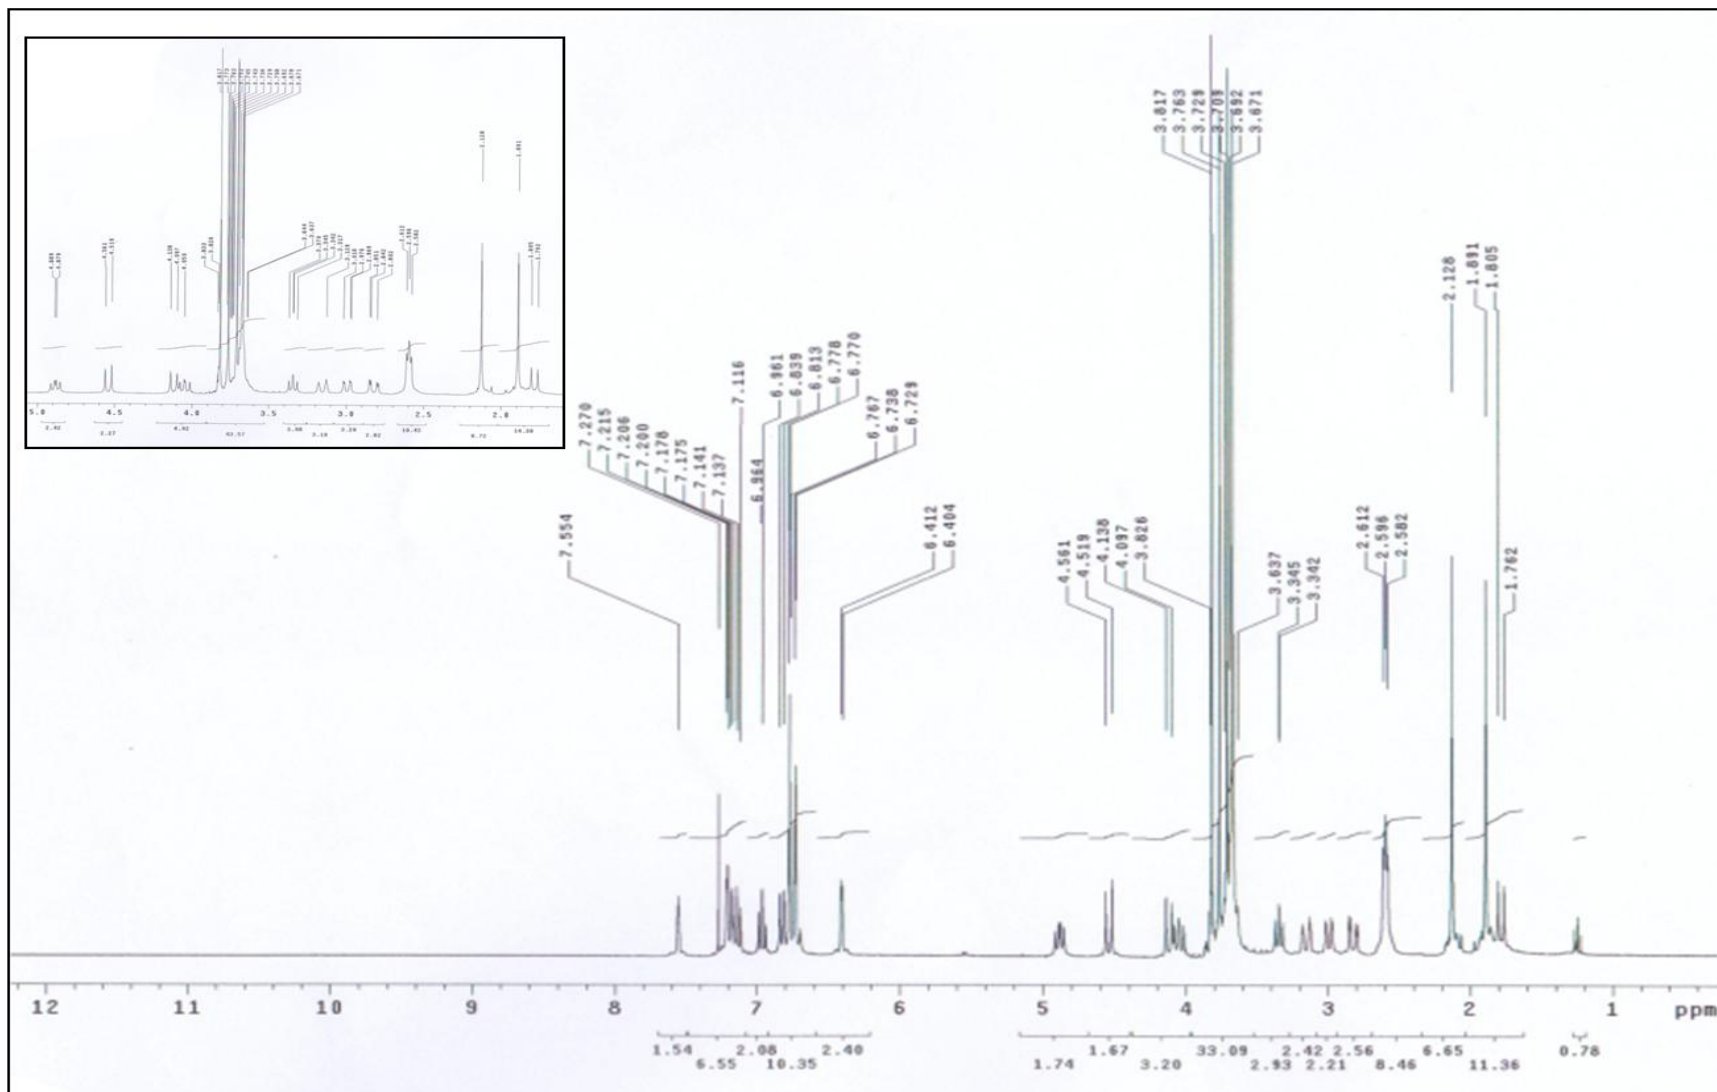

Figure S95.  $^1\text{H-NMR}$  spectrum of compound **59** in  $\text{CDCl}_3$ .



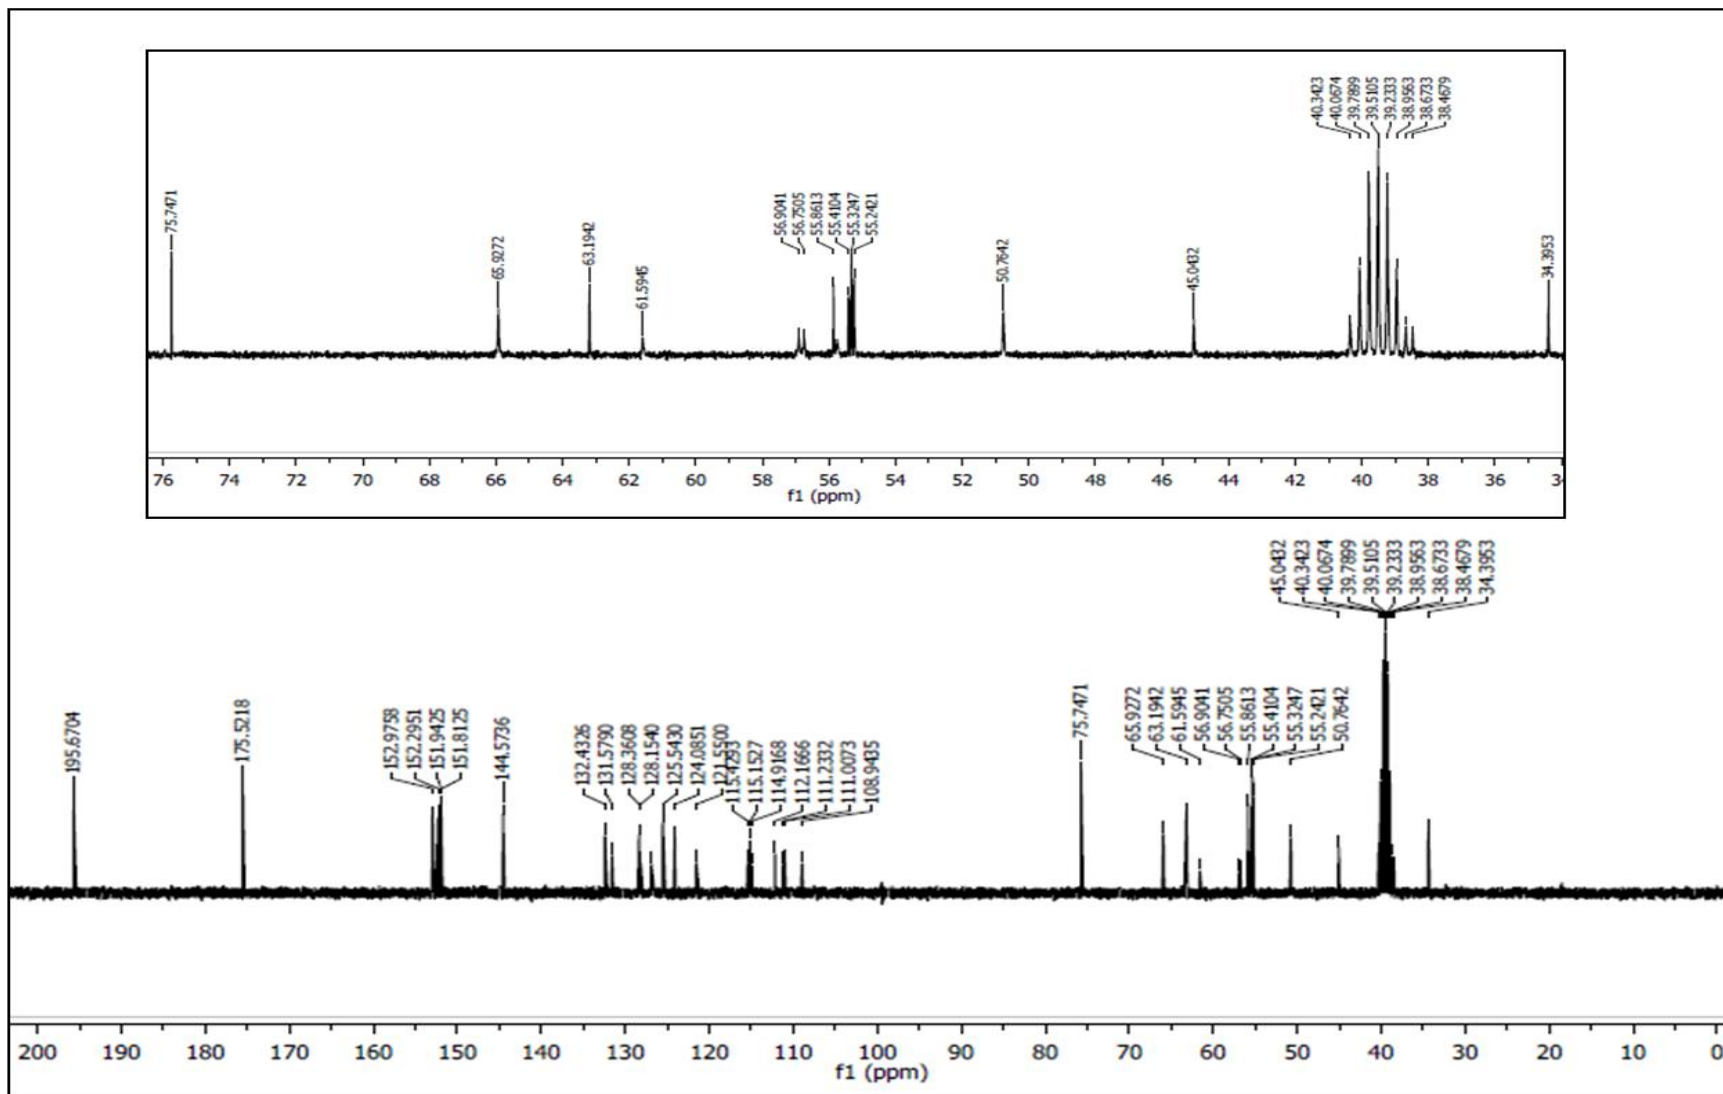

Figure S96.  $^{13}\text{C}$ -NMR spectrum of compound **59** in  $\text{DMSO-}d_6$ .

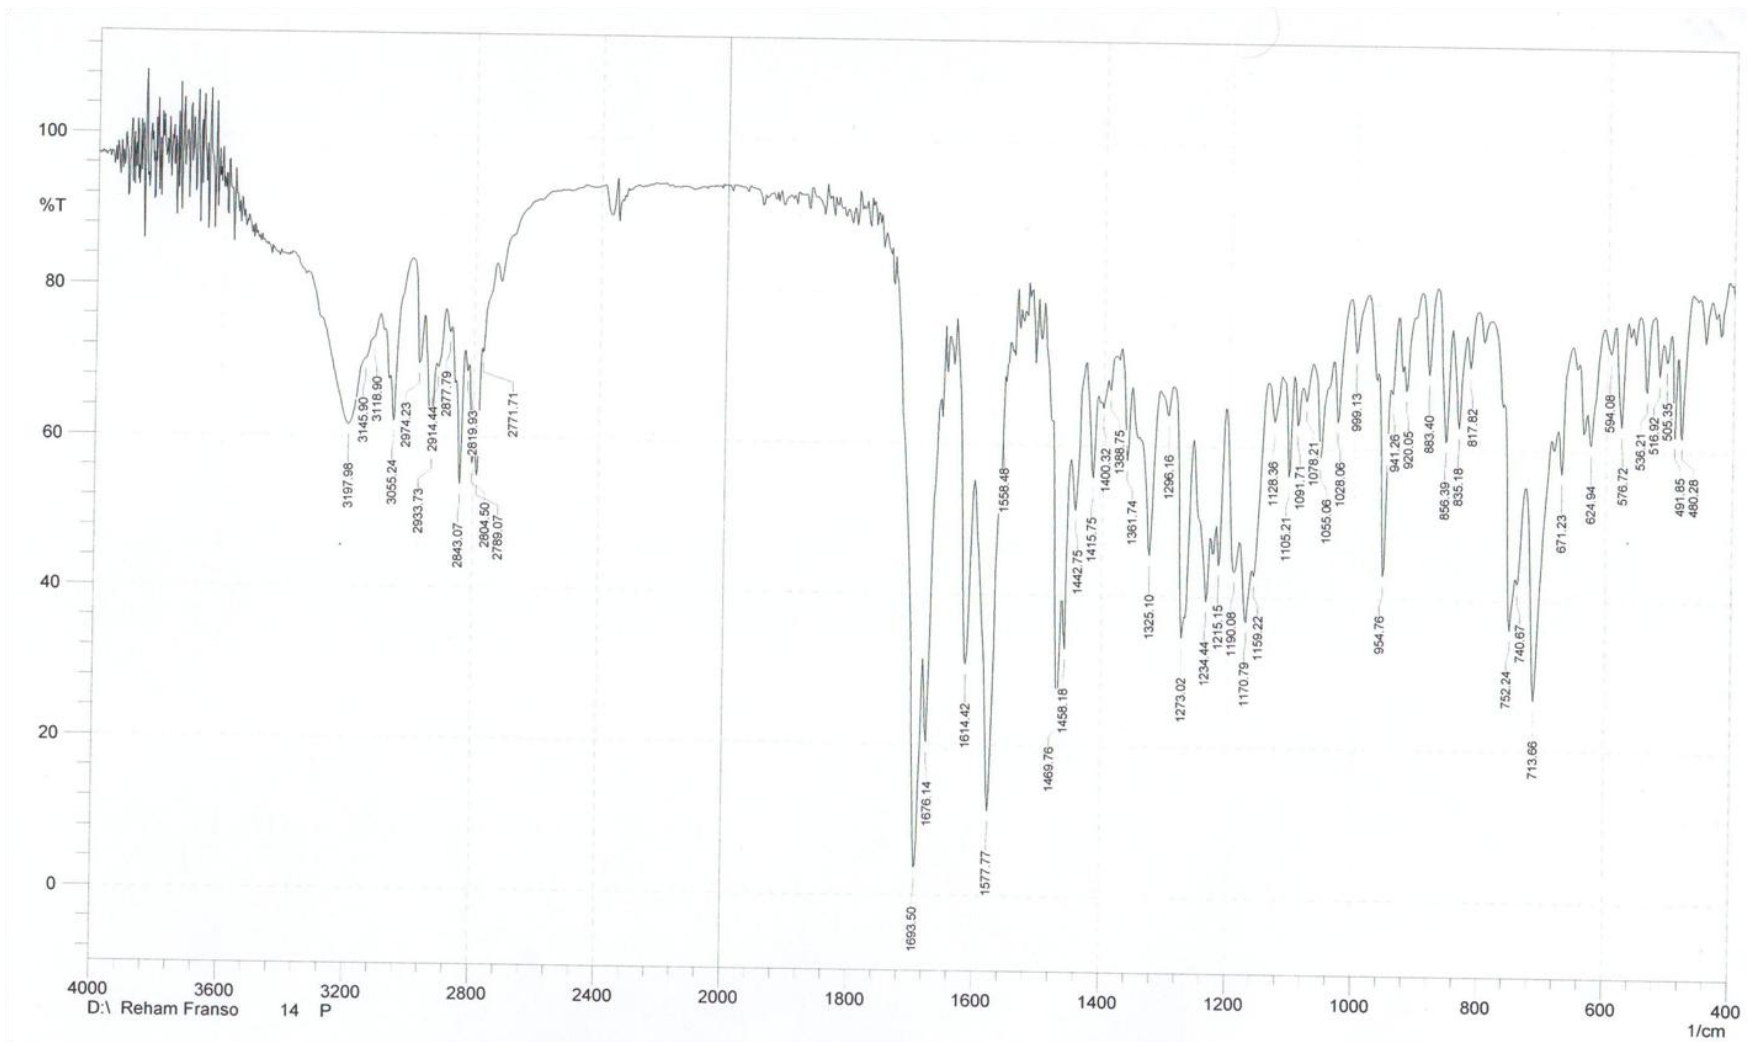

Figure S97. IR spectrum of compound **60** (KBr pellet).

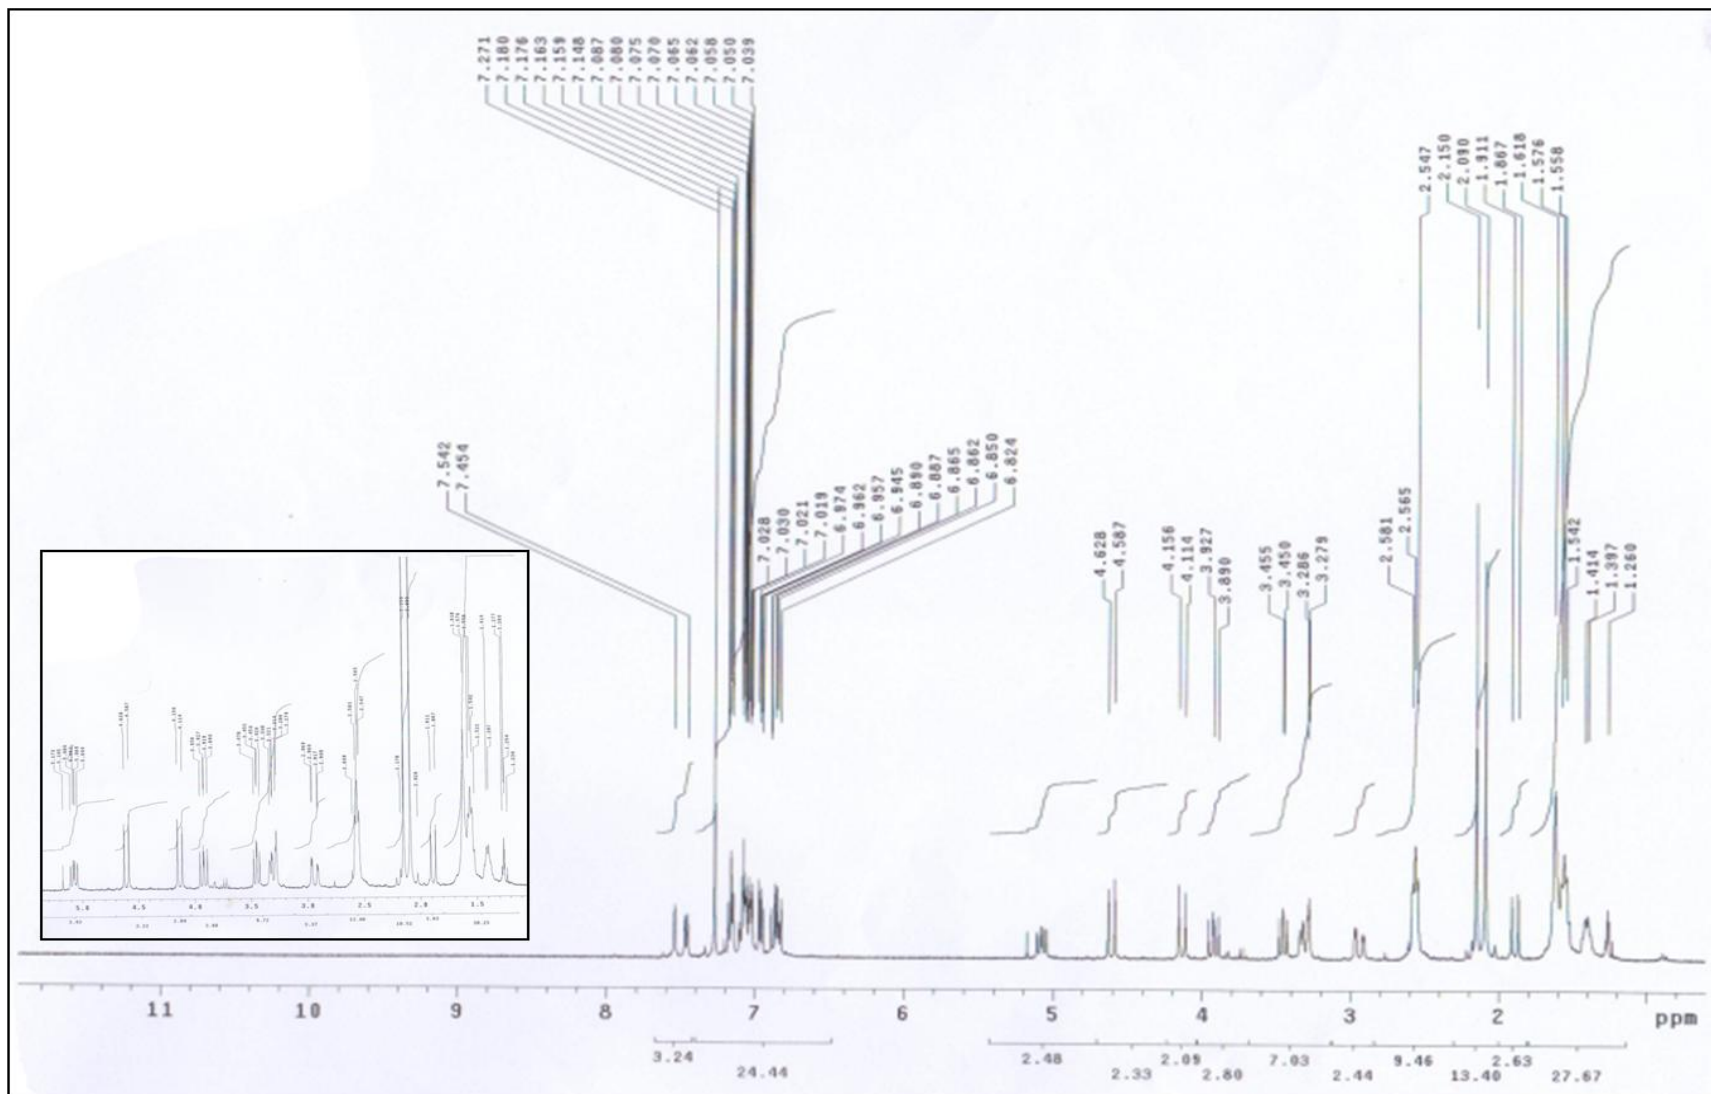

**Figure S98.** <sup>1</sup>H-NMR spectrum of compound **60** in CDCl<sub>3</sub>.

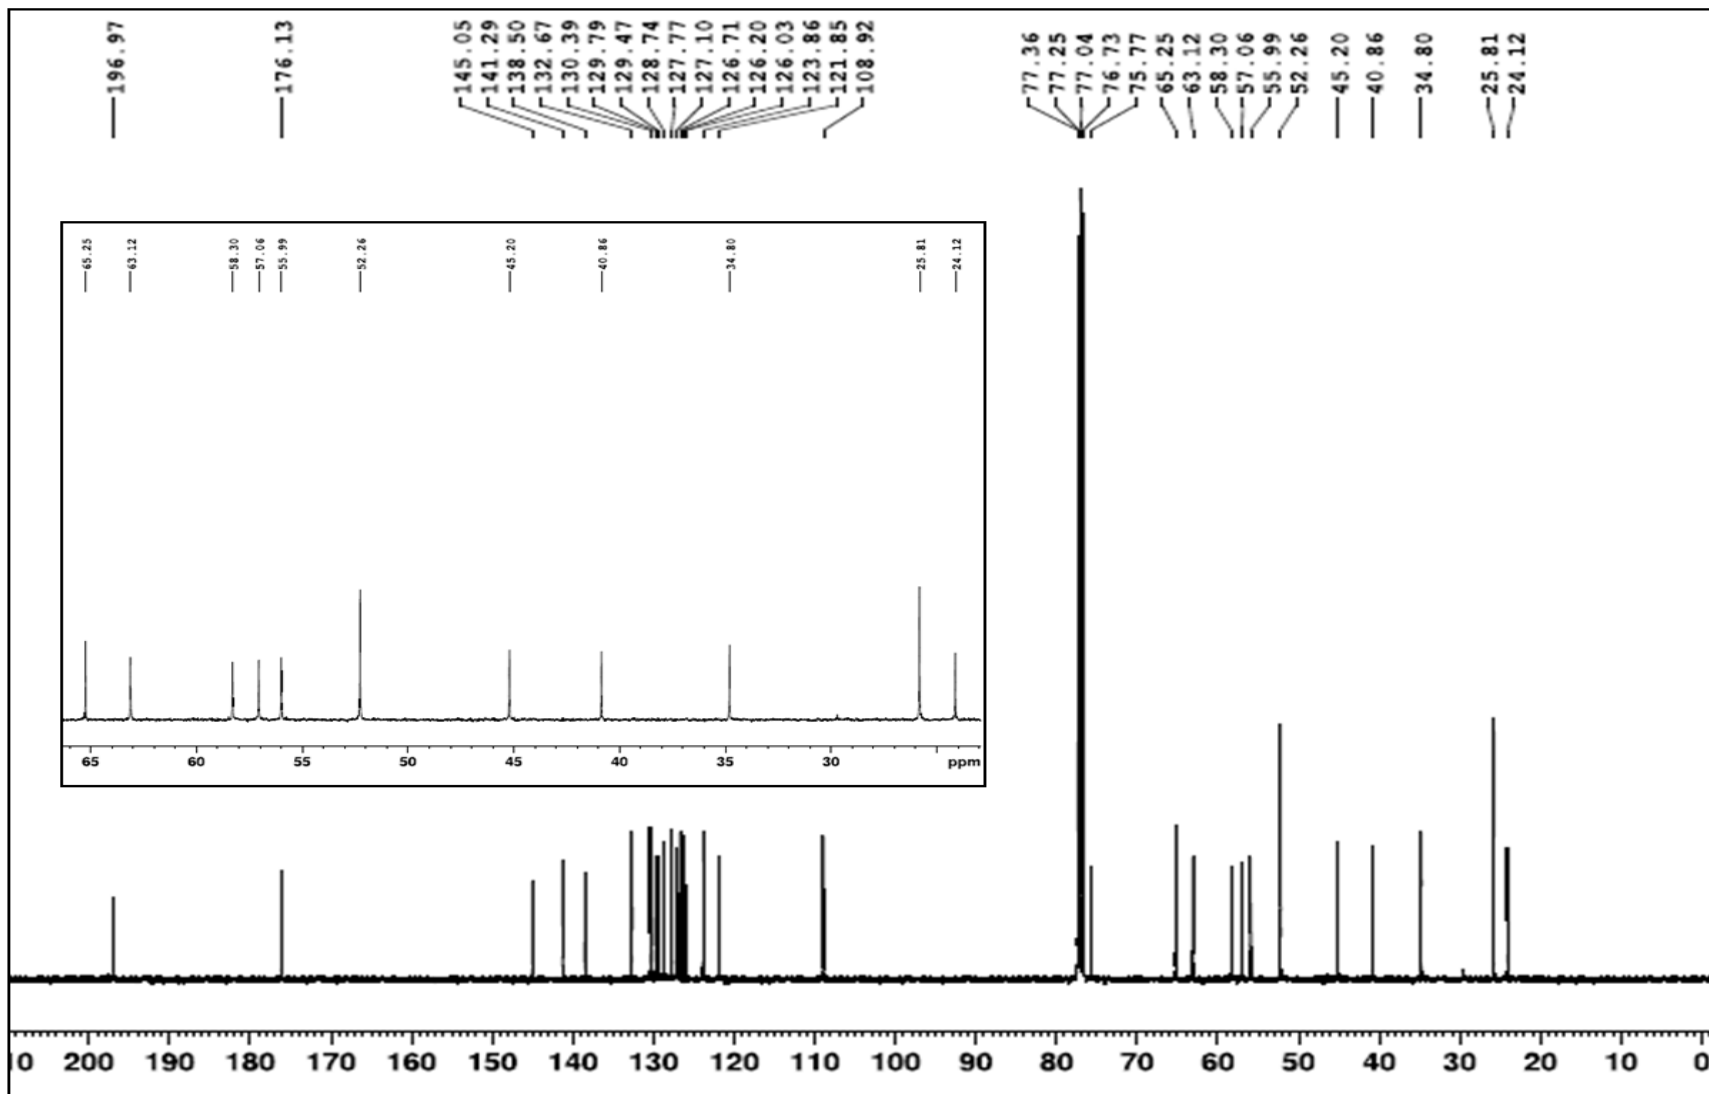

Figure S99. <sup>13</sup>C-NMR spectrum of compound **60** in CDCl<sub>3</sub>.

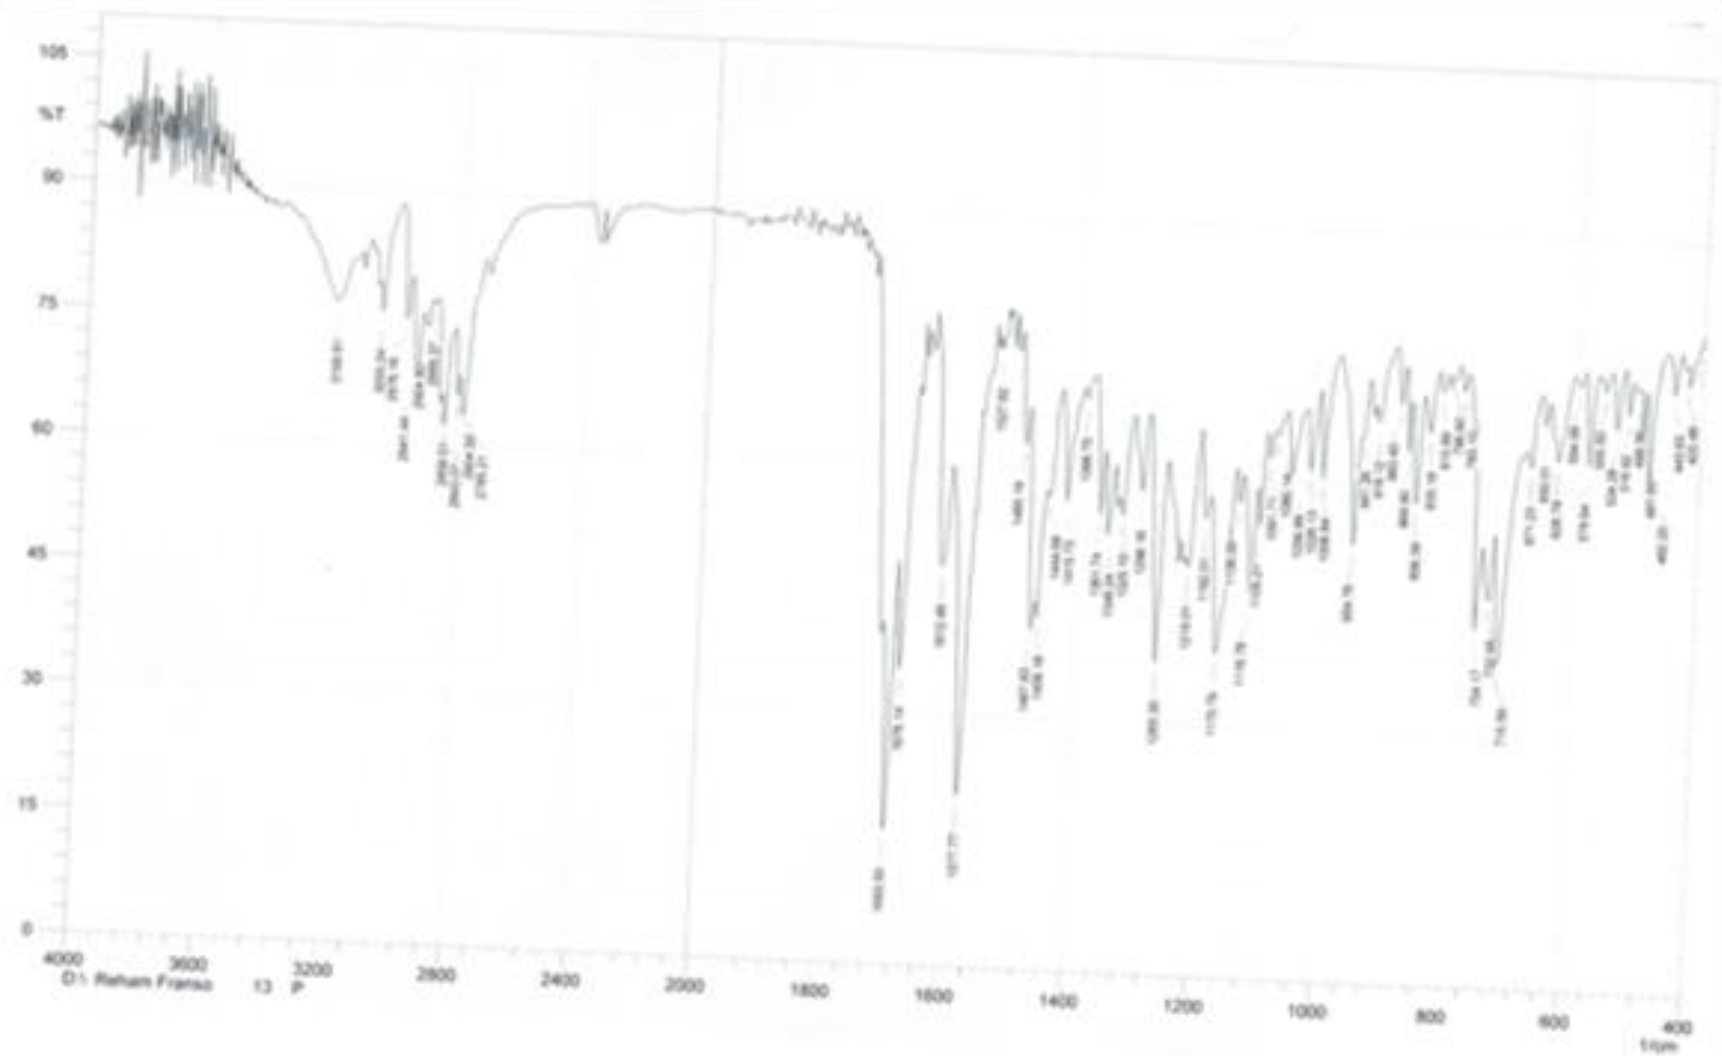

**Figure S100.** IR spectrum of compound **61** (KBr pellet).

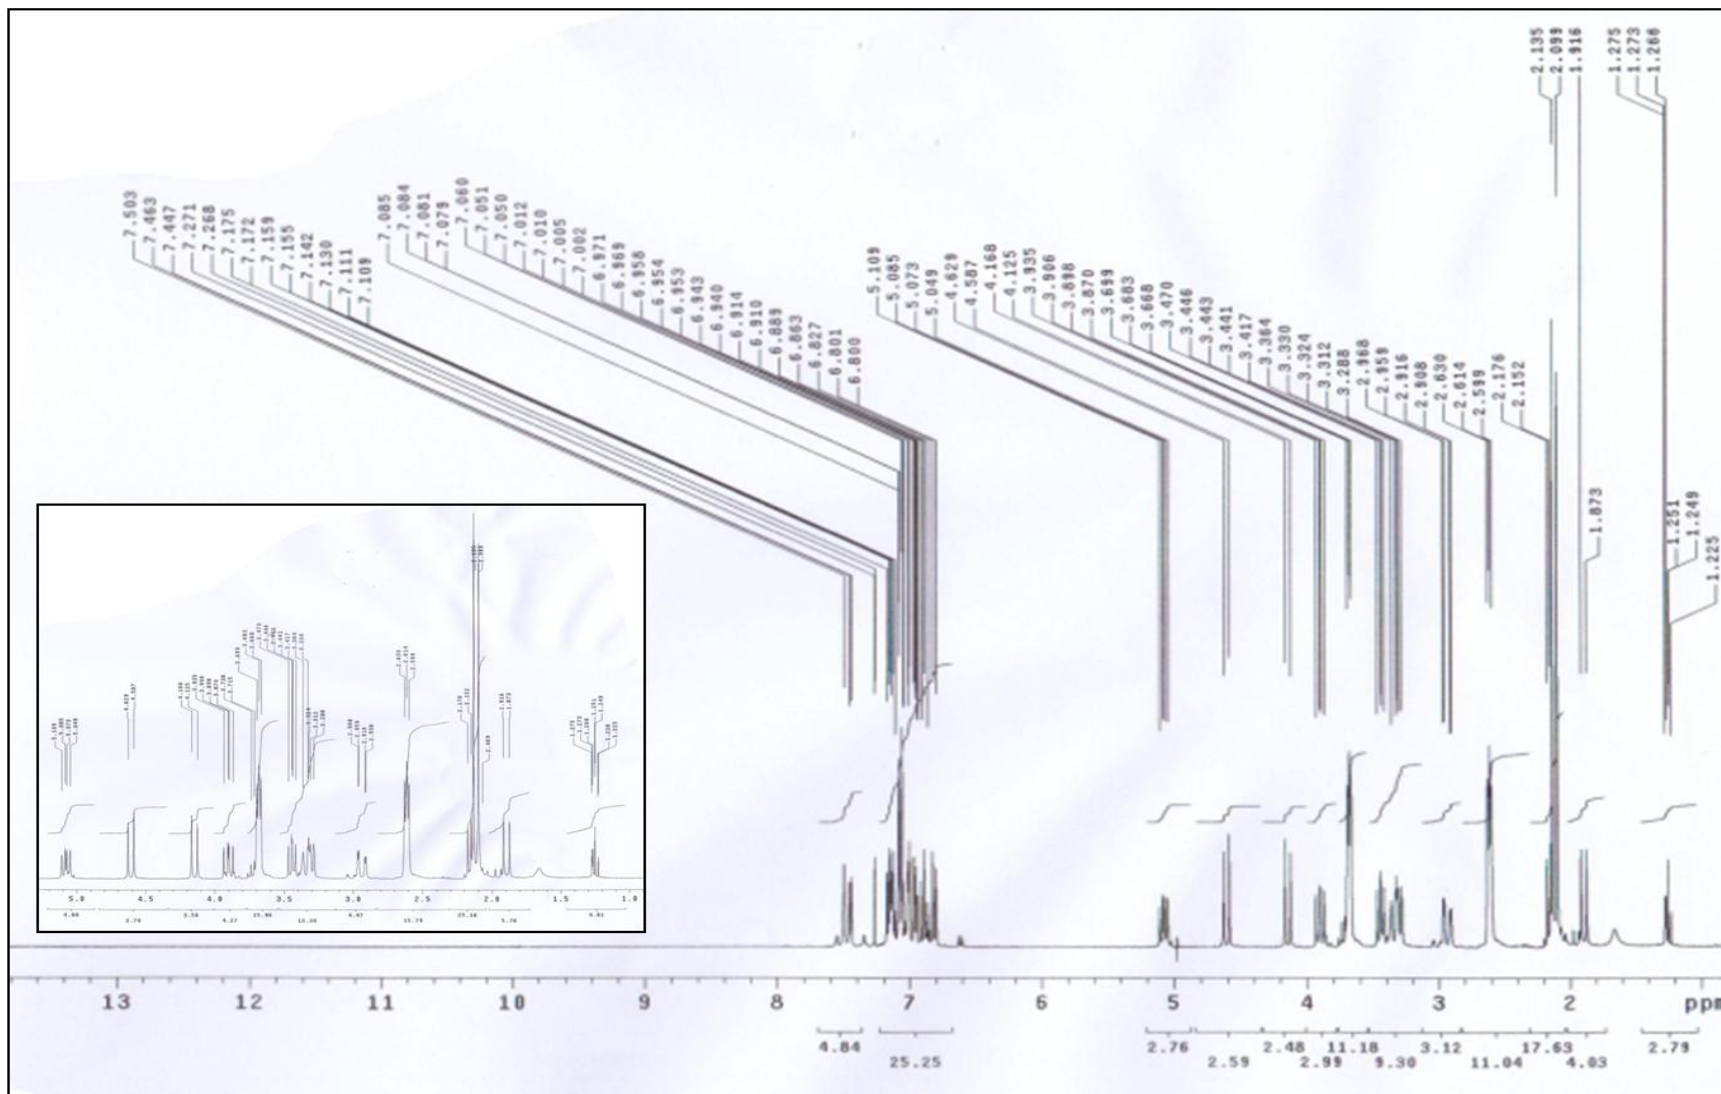

**Figure S101.** <sup>1</sup>H-NMR spectrum of compound **61** in CDCl<sub>3</sub>.

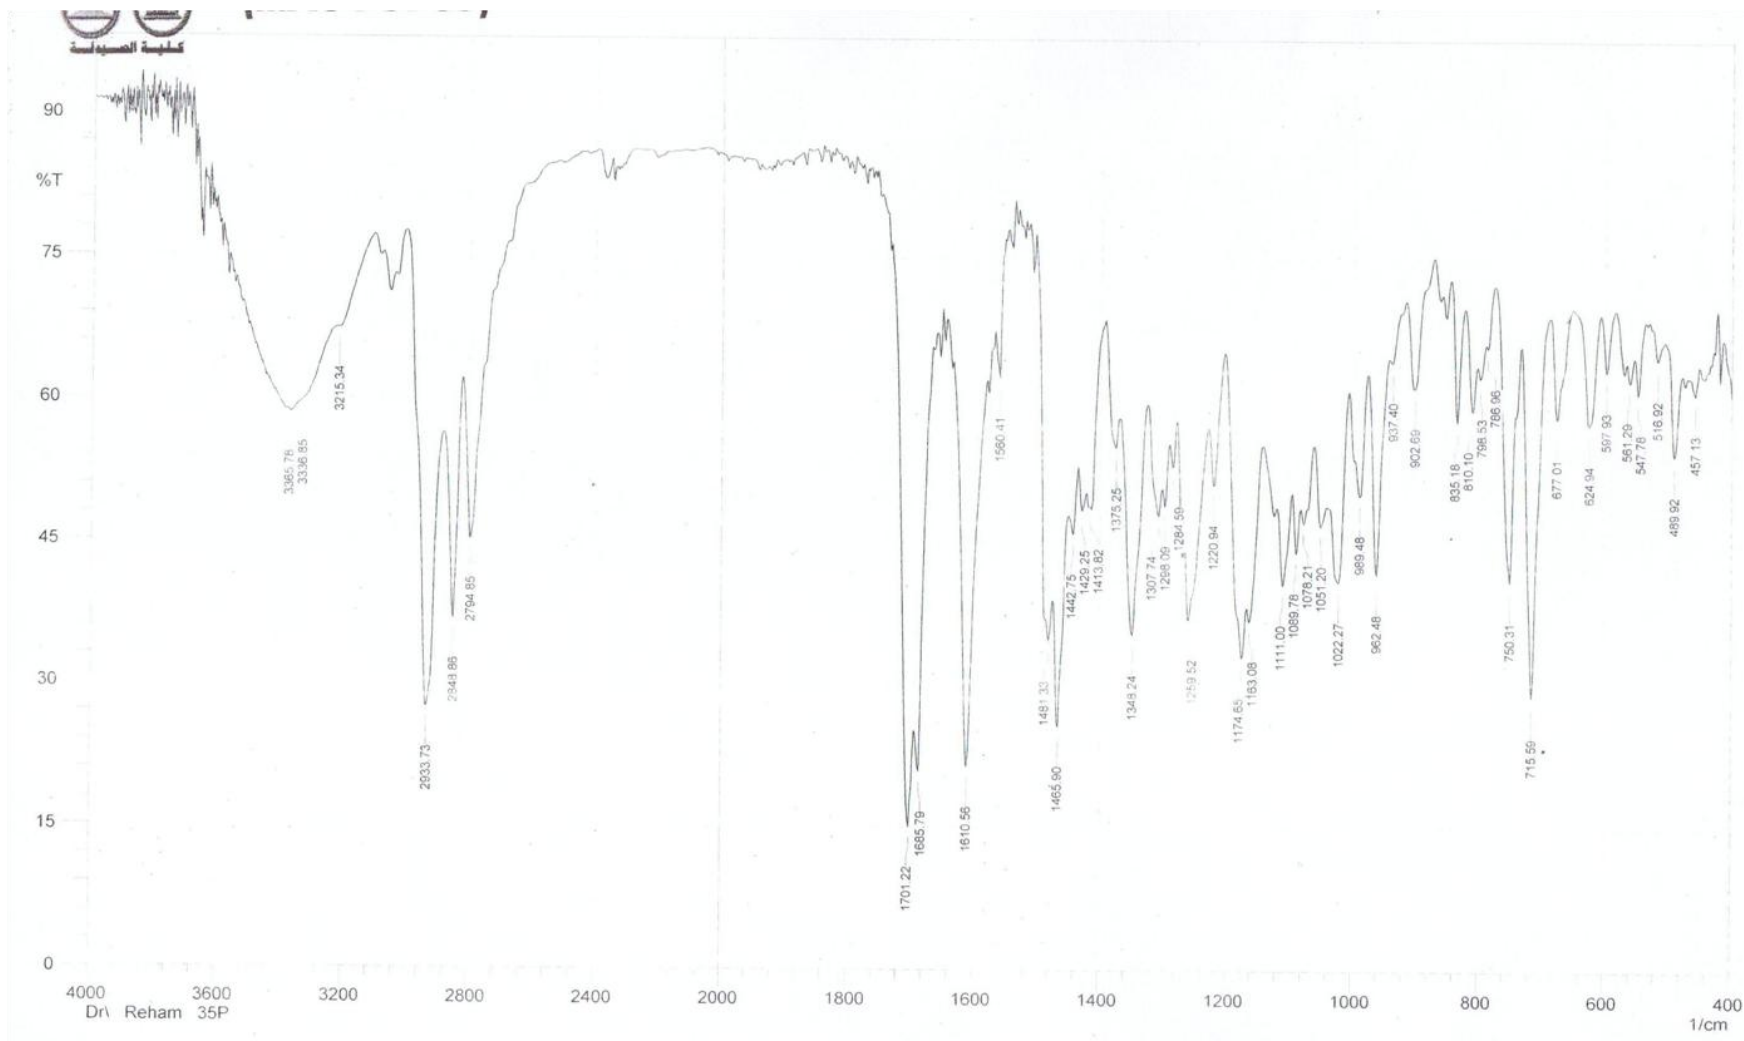

**Figure S102.** IR spectrum of compound **62** (KBr pellet).

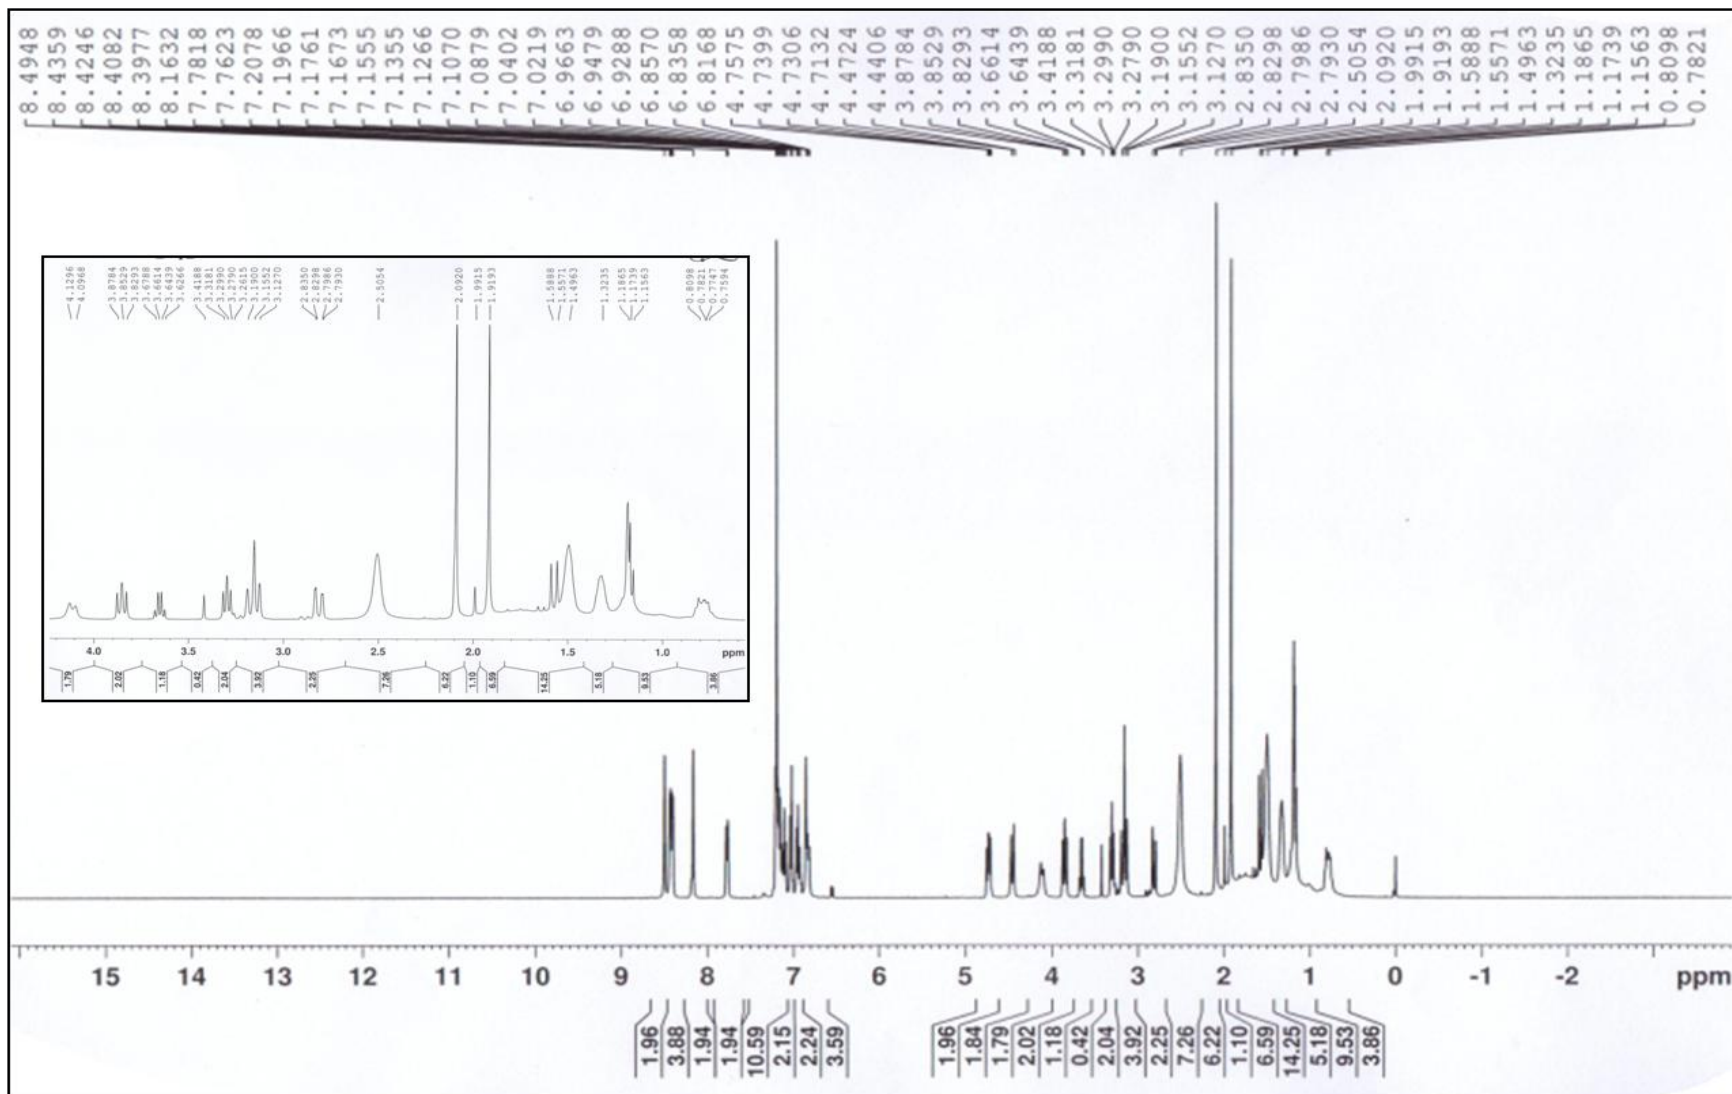

**Figure S103.**  $^1\text{H-NMR}$  spectrum of compound **62** in  $\text{CDCl}_3$ .



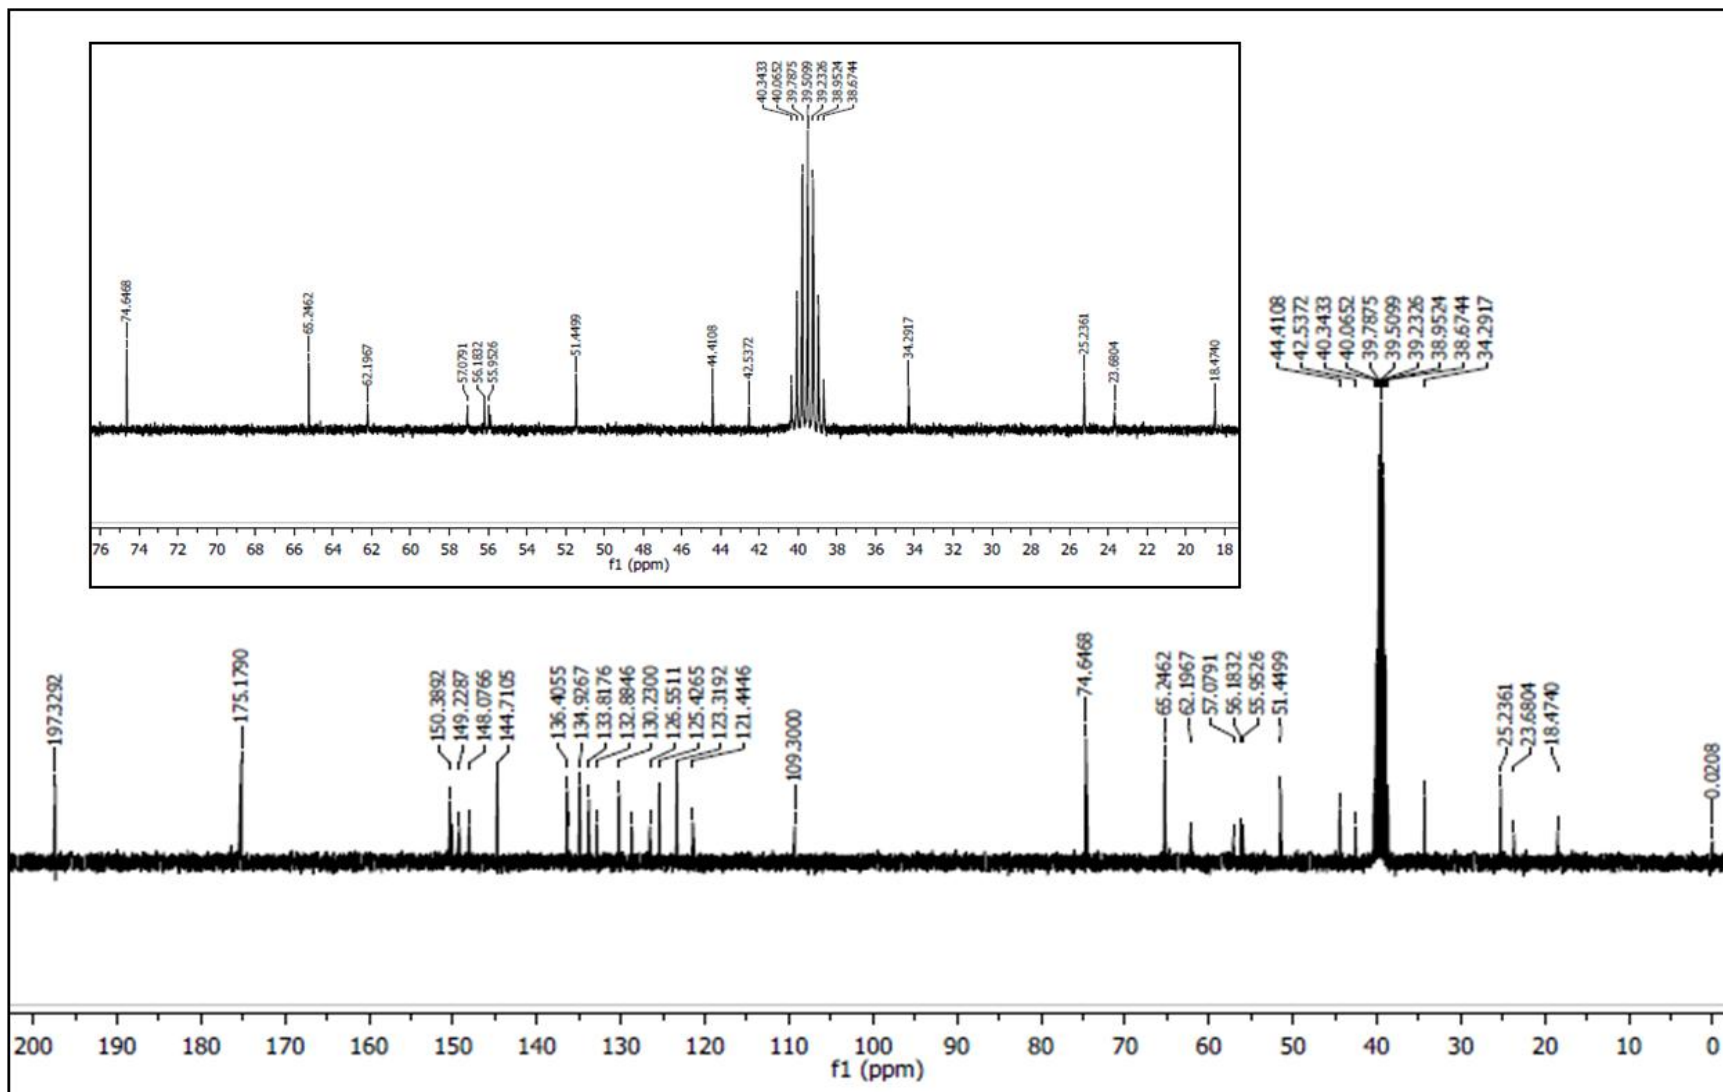

**Figure S104.**  $^{13}\text{C}$ -NMR spectrum of compound **62** in  $\text{DMSO-}d_6$ .

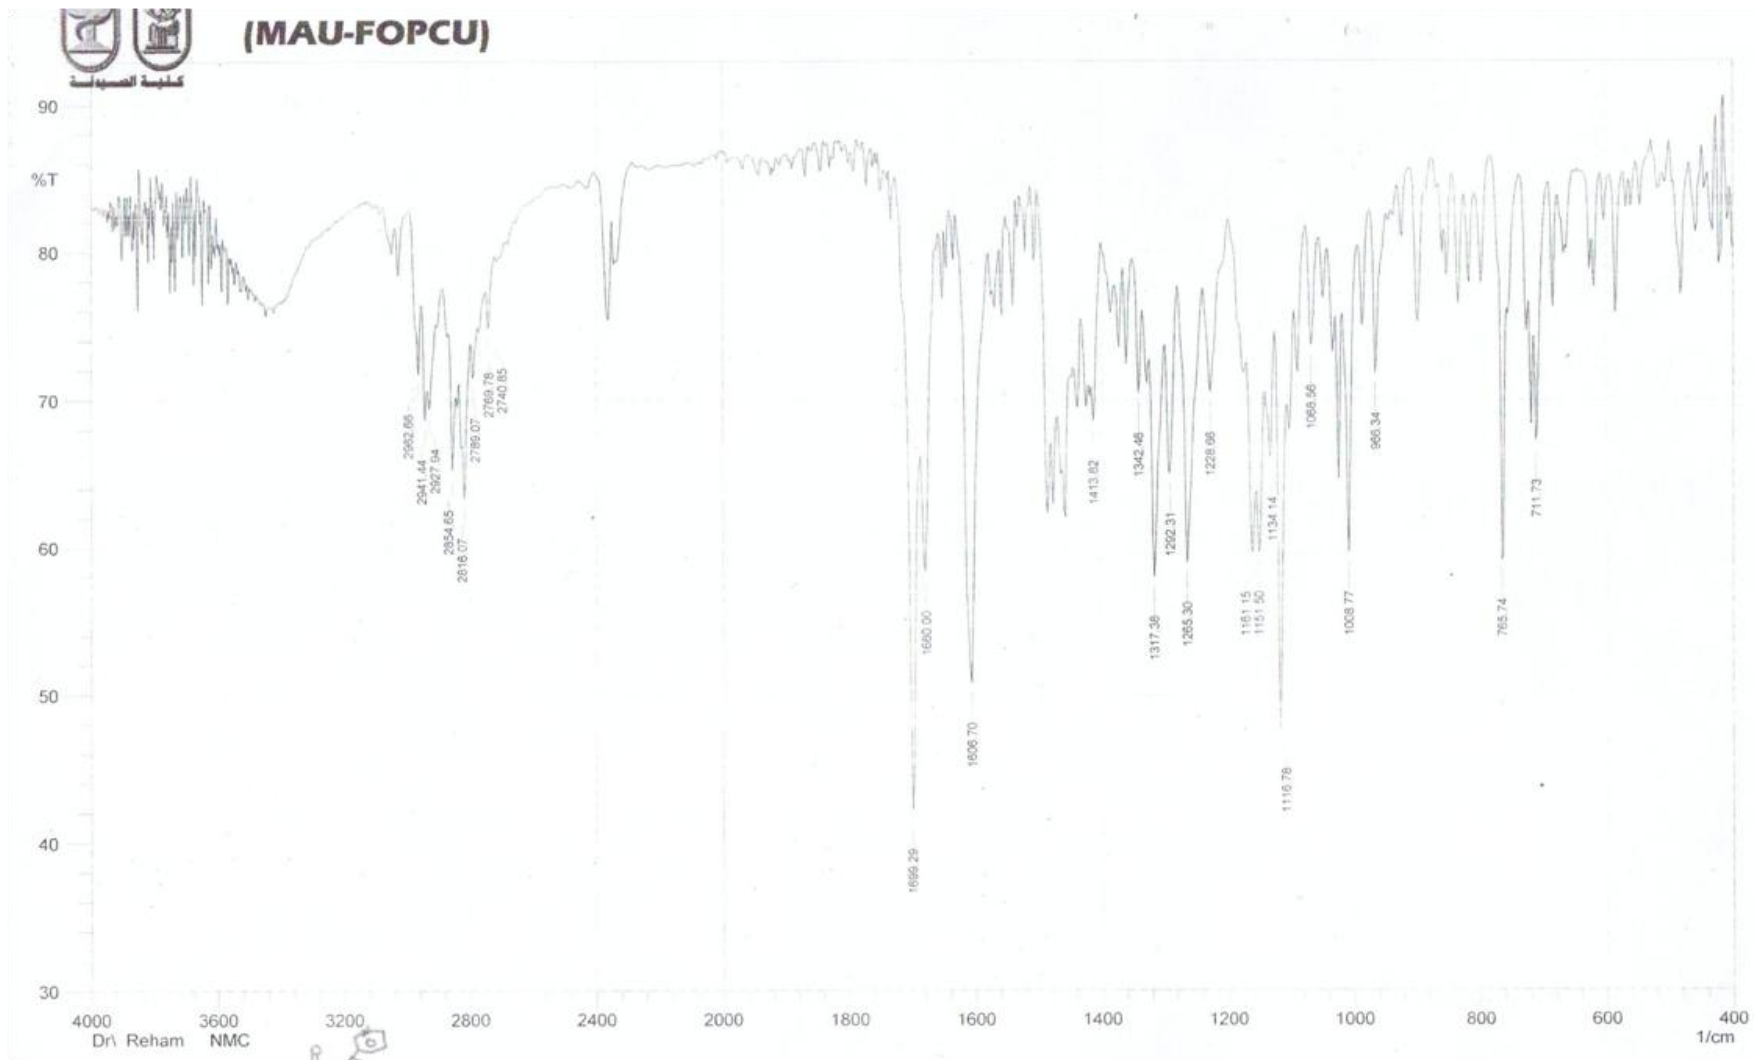

Figure S105. IR spectrum of compound **63** (KBr pellet).

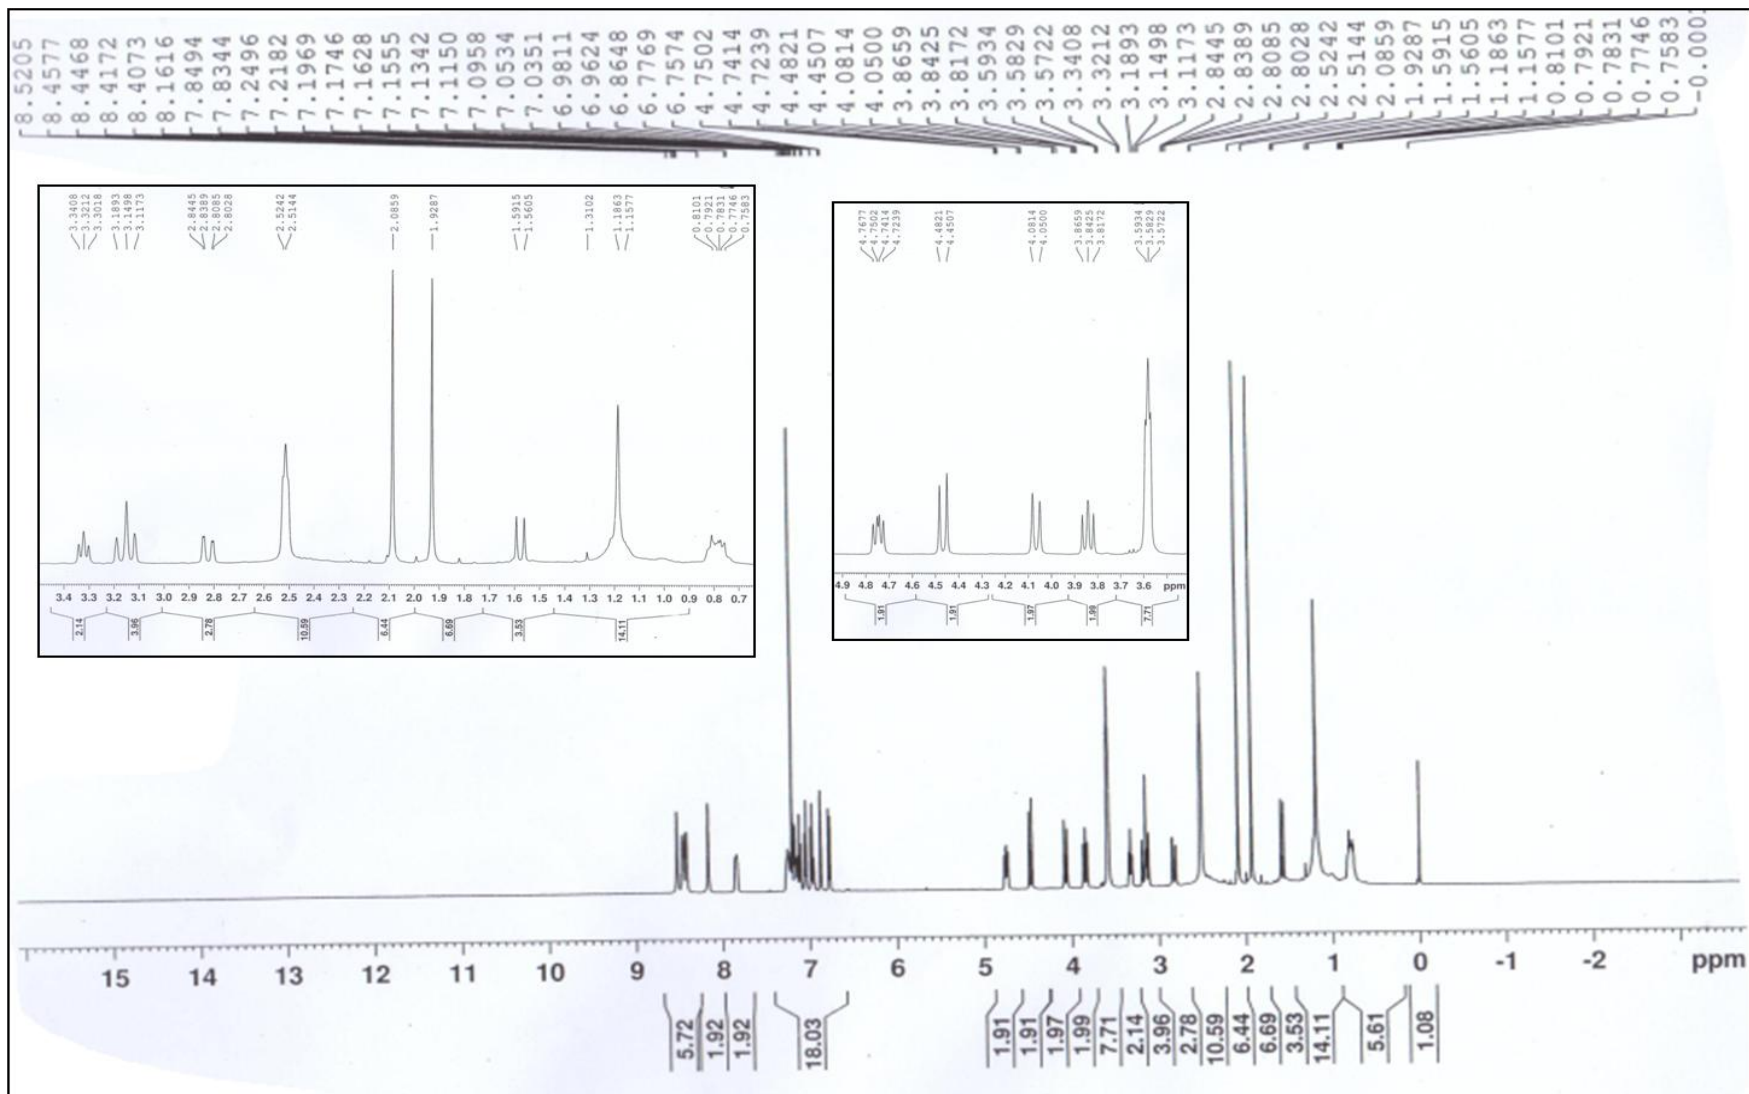

Figure S106.  $^1\text{H-NMR}$  spectrum of compound **63** in  $\text{CDCl}_3$ .

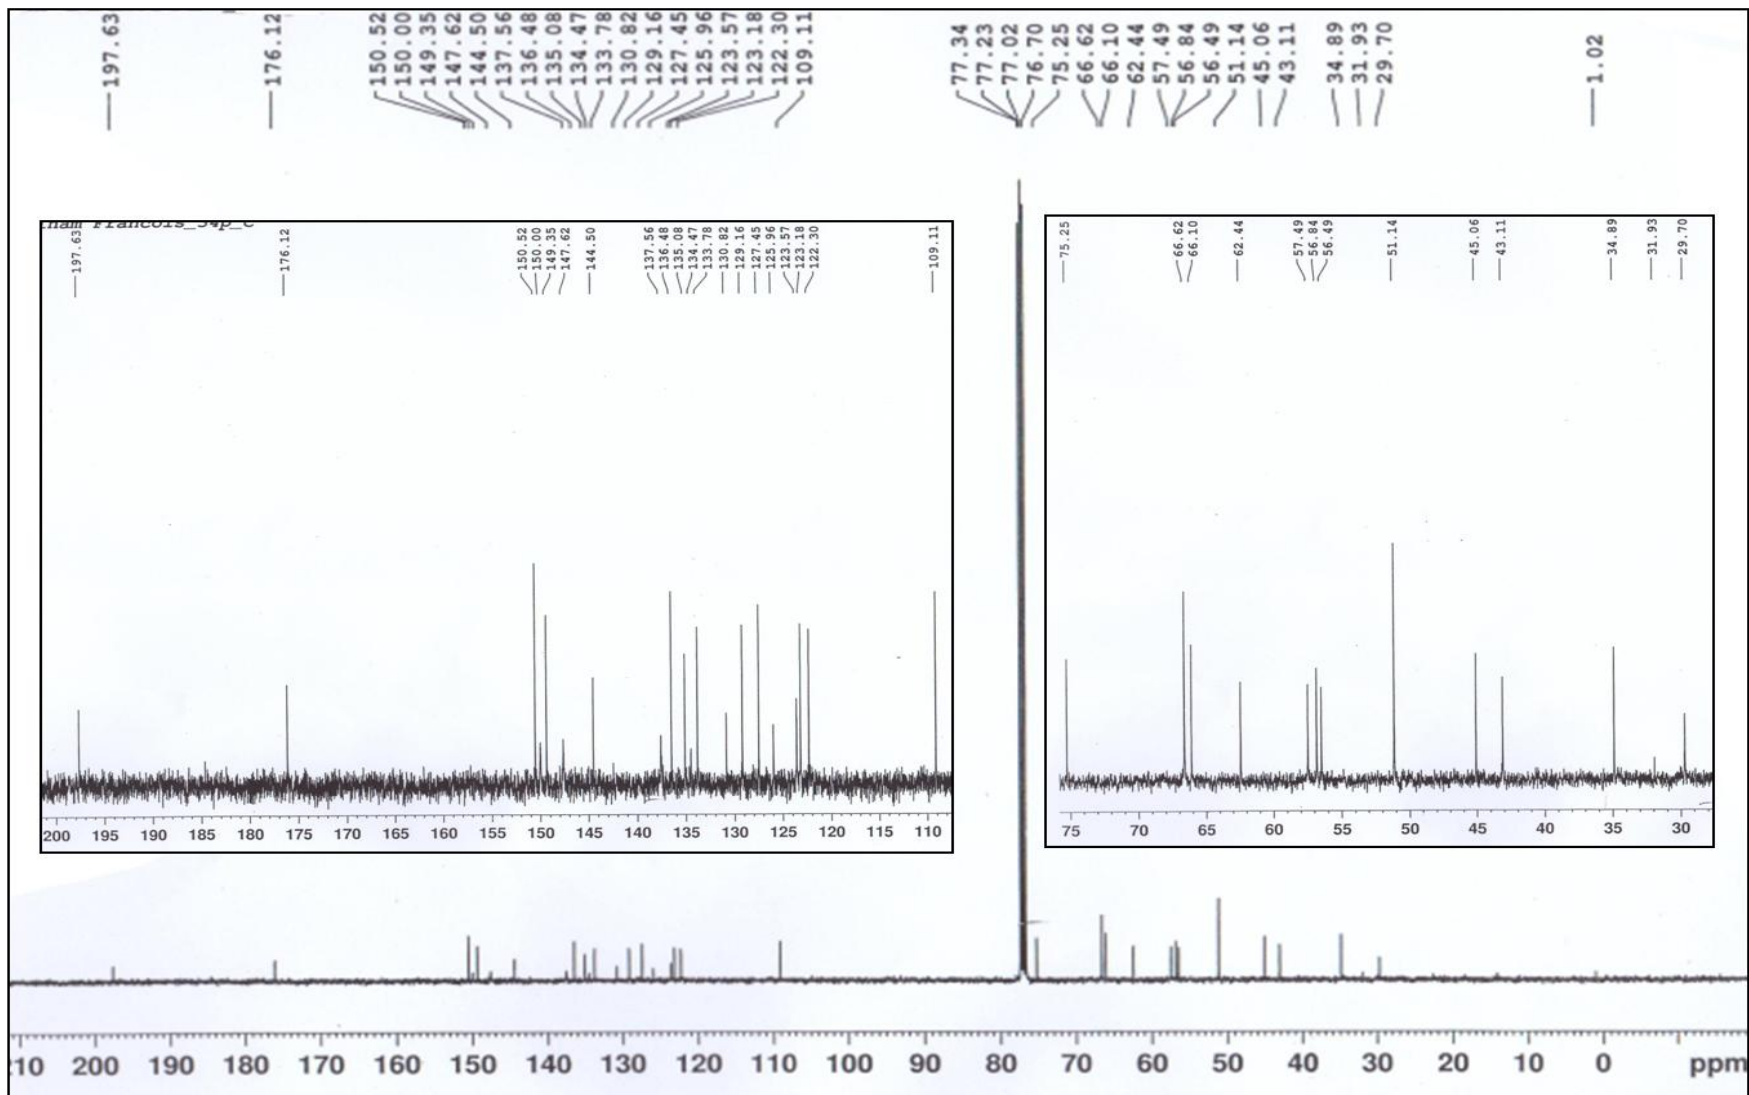

Figure S107.  $^{13}\text{C}$ -NMR spectrum of compound **63** in  $\text{CDCl}_3$ .

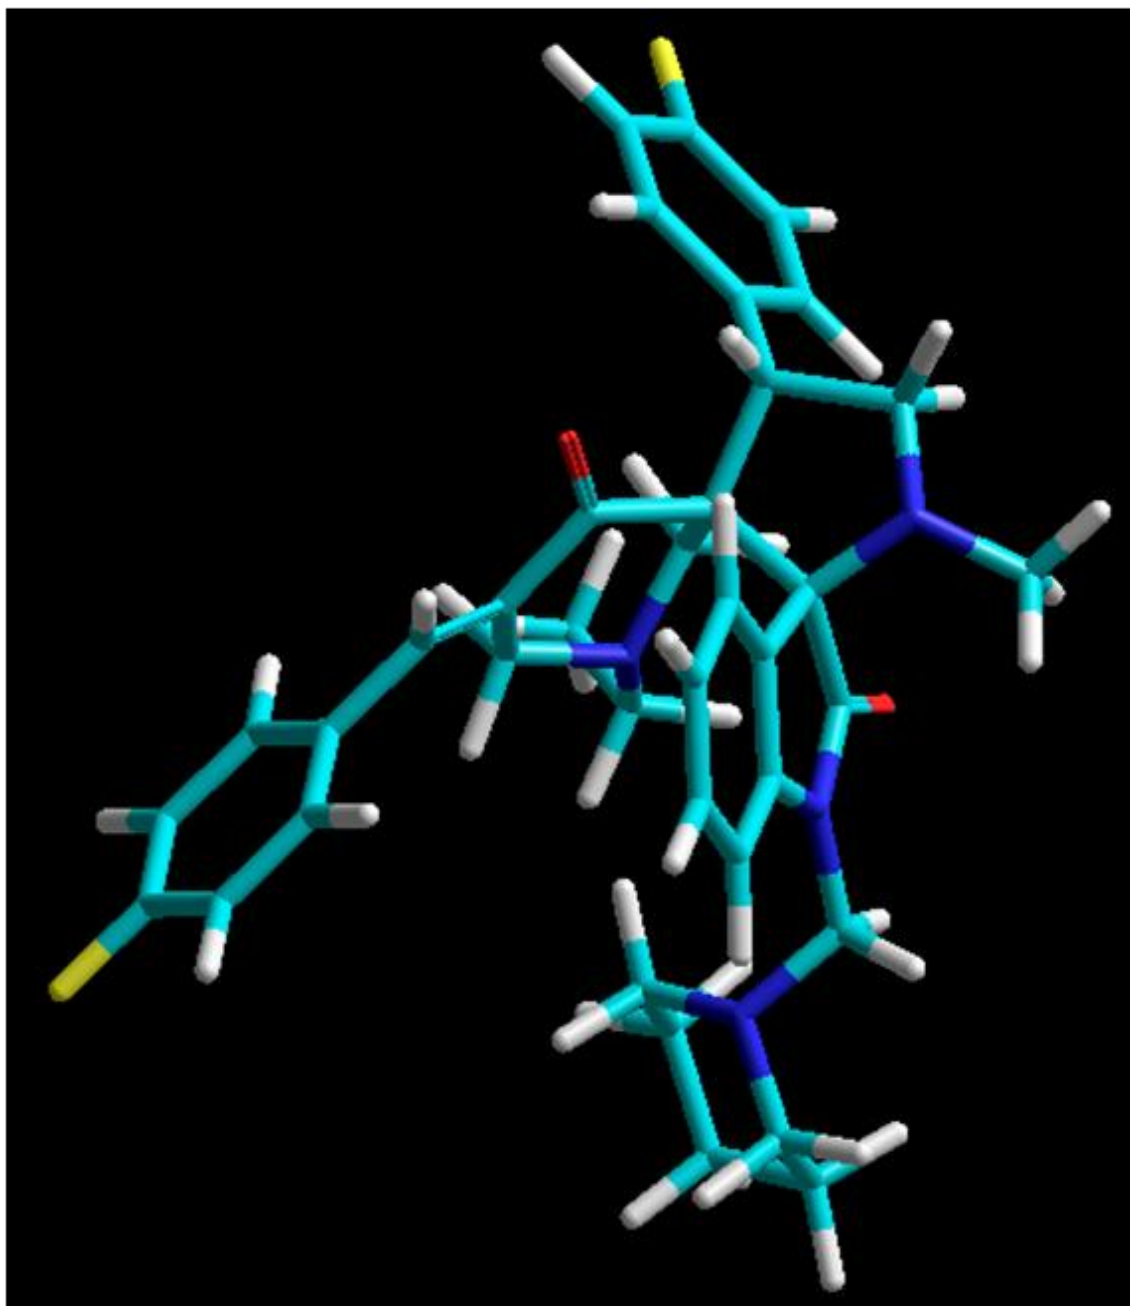

**Figure 108.** A projection of the optimized structure of compound **46** by semi-empirical AM1.

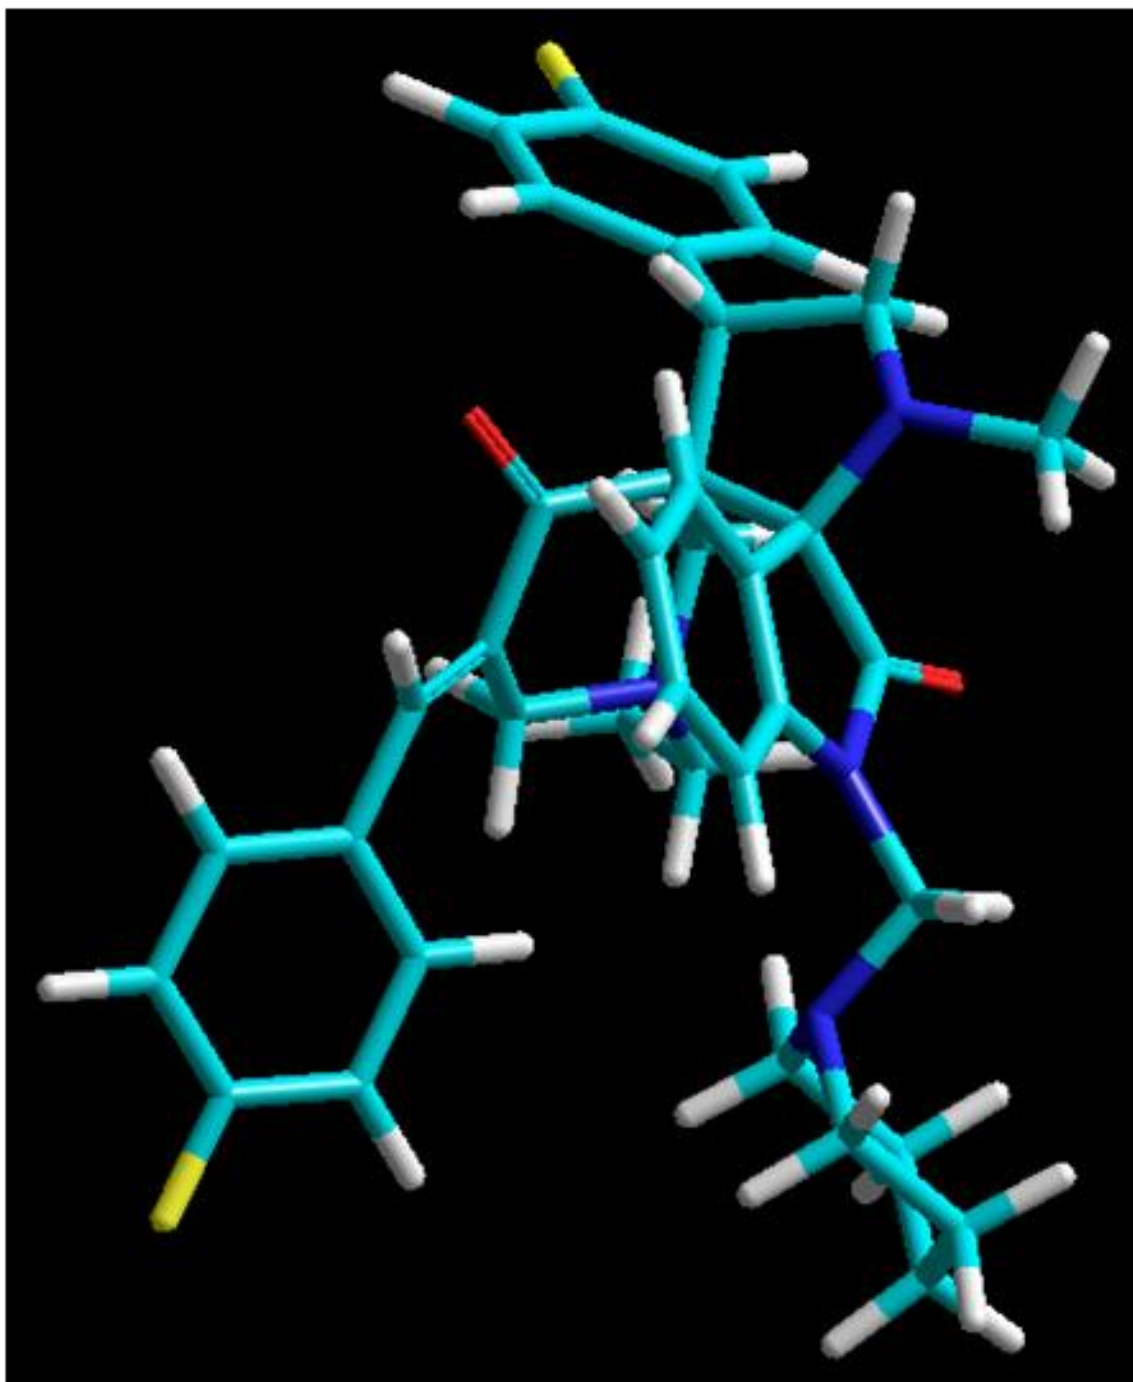

**Figure 109.** A projection of the optimized structure of compound **46** by semi-empirical PM3.

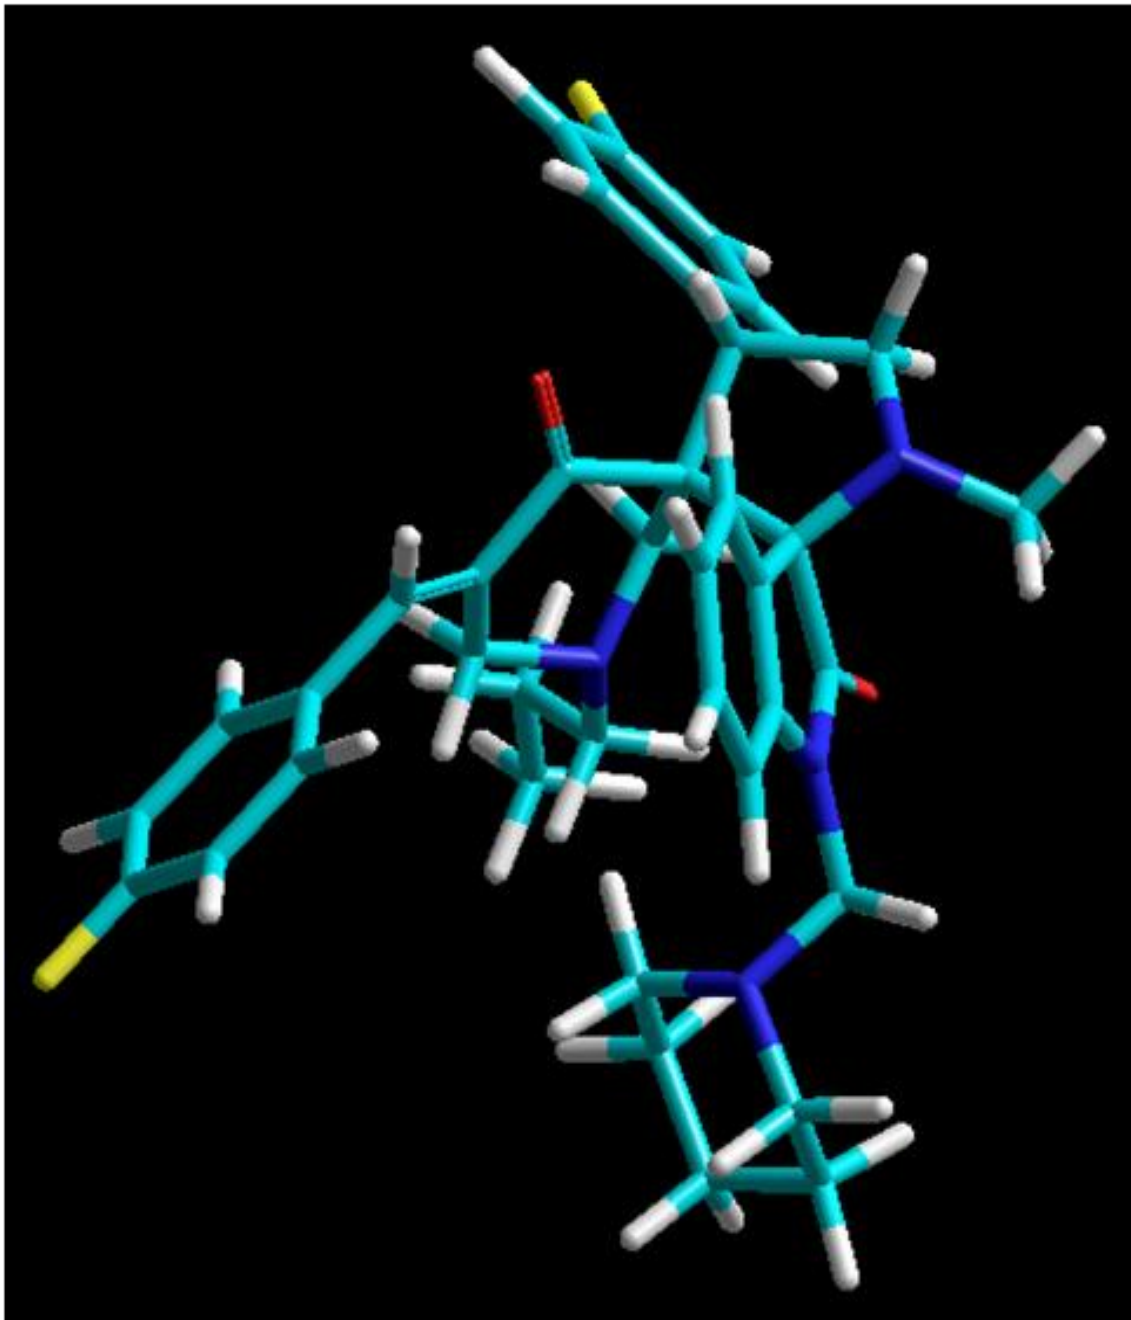

**Figure 110.** A projection of the optimized structure of compound **48** by semi-empirical AM1.

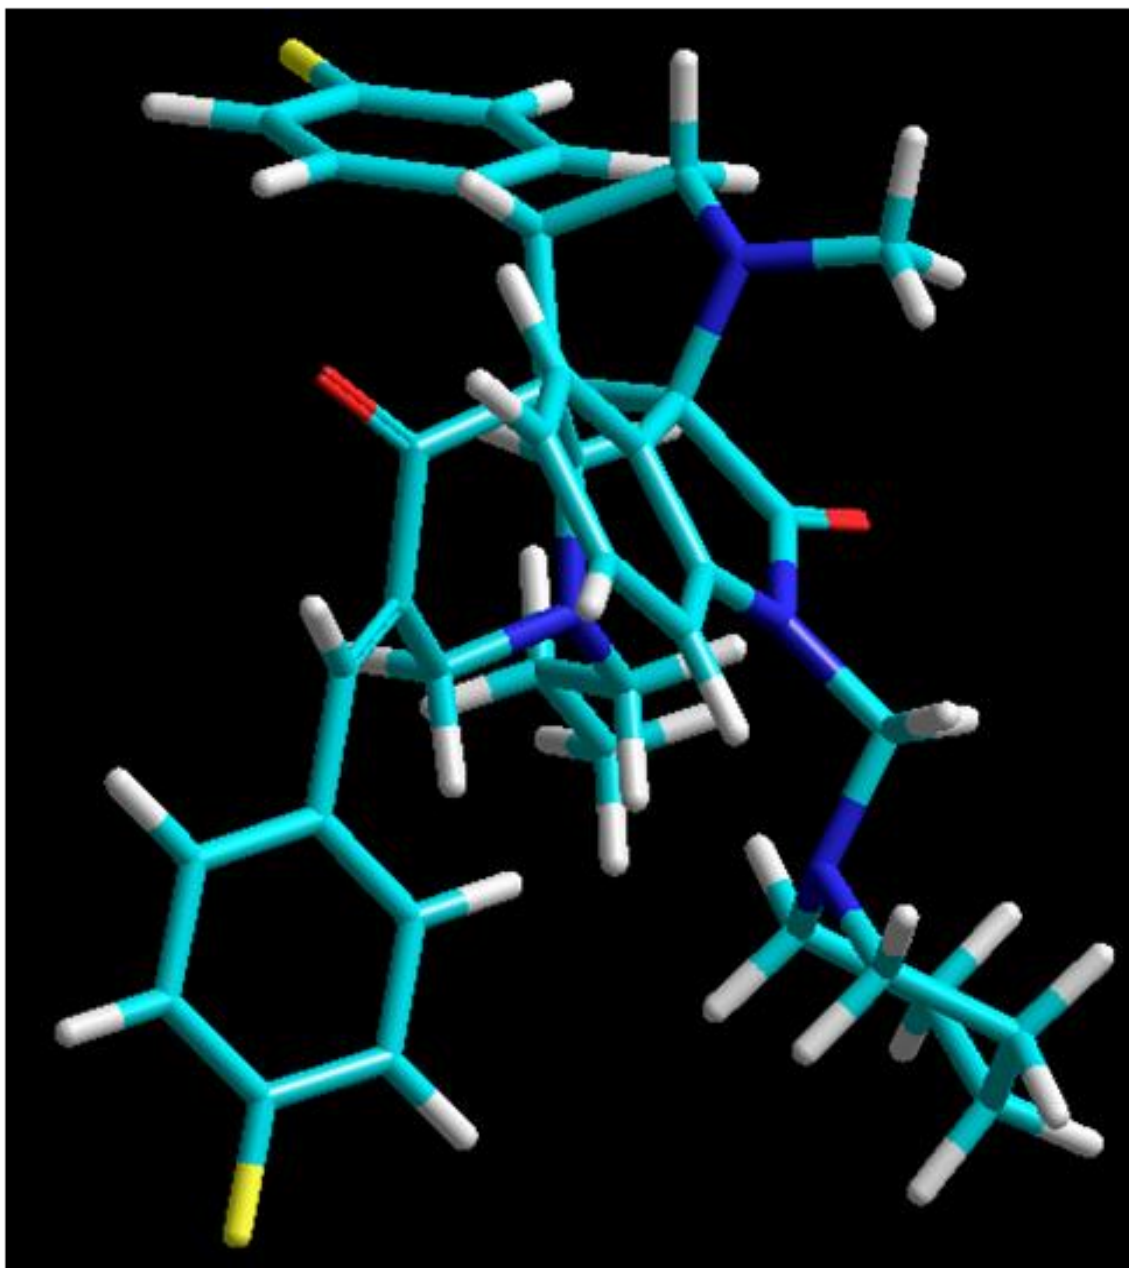

**Figure 111.** A projection of the optimized structure of compound **48** by semi-empirical PM3.



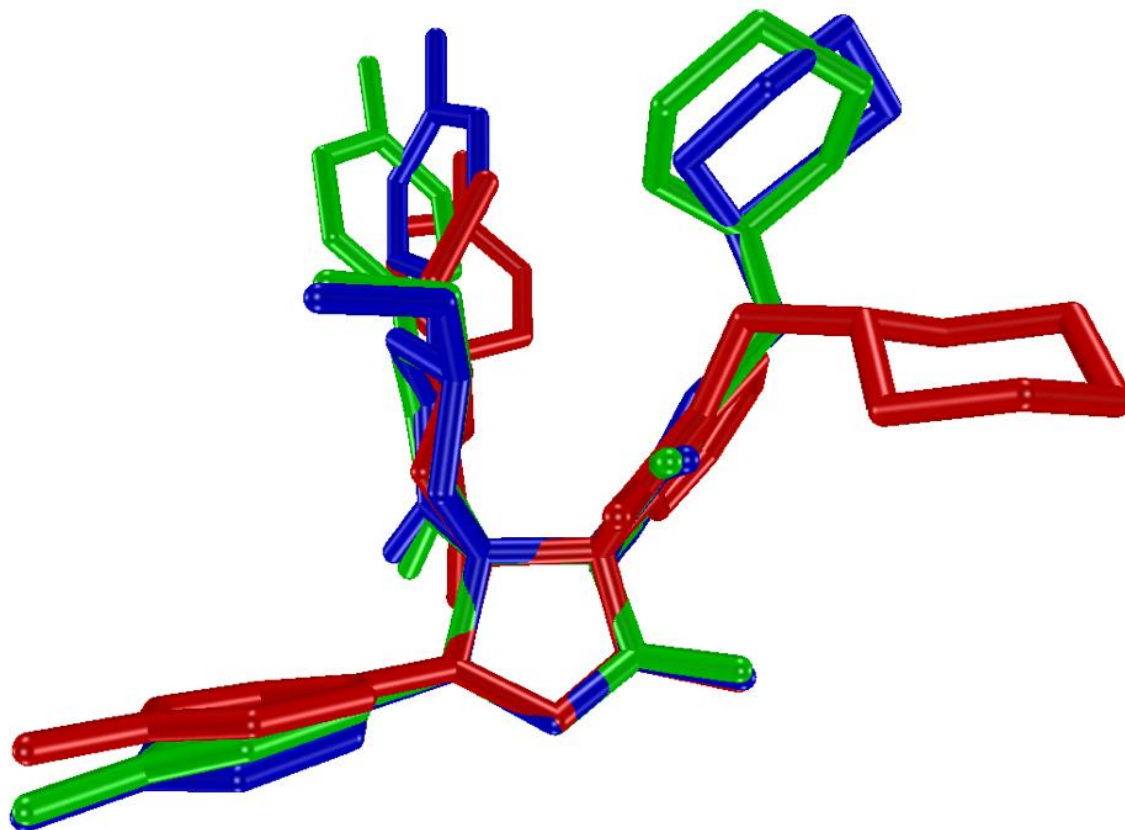

**Figure 112.** Overlay diagram of compound **46**, drawn so that the central pyrrolidine rings are overlapped (red, X-ray; green, AM1; and blue, PM3).

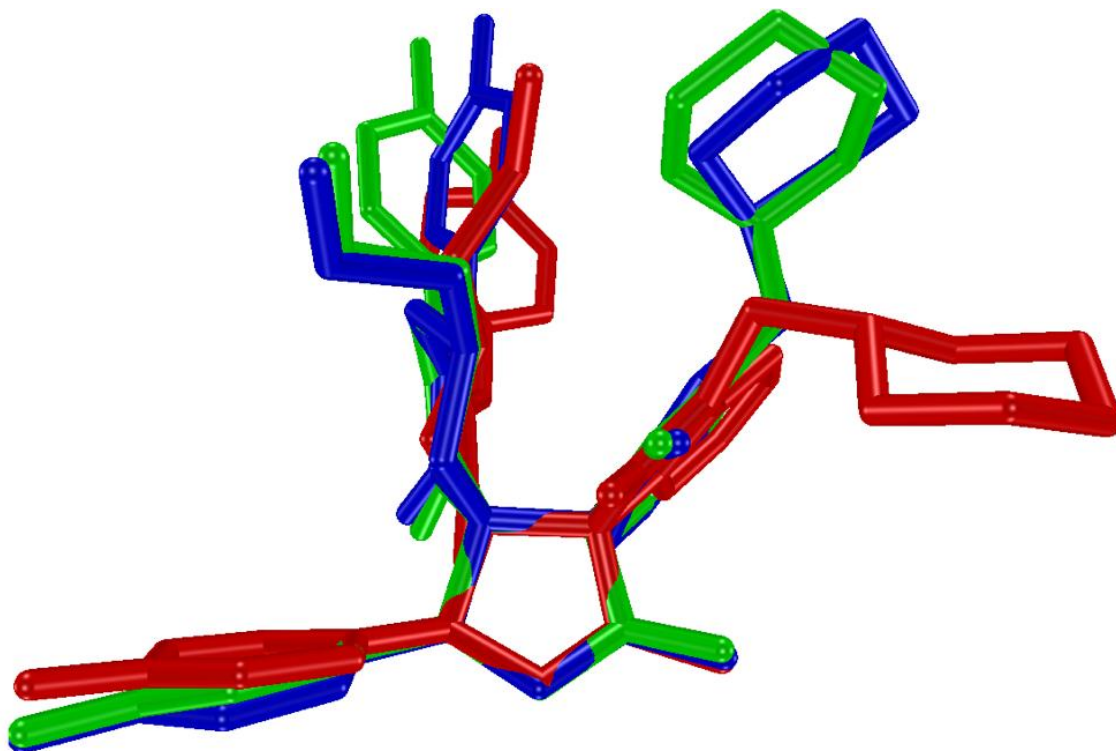

**Figure 113.** Overlay diagram of compound **48**, drawn so that the central pyrrolidine rings are overlapped (red, X-ray; green, AM1; and blue, PM3).

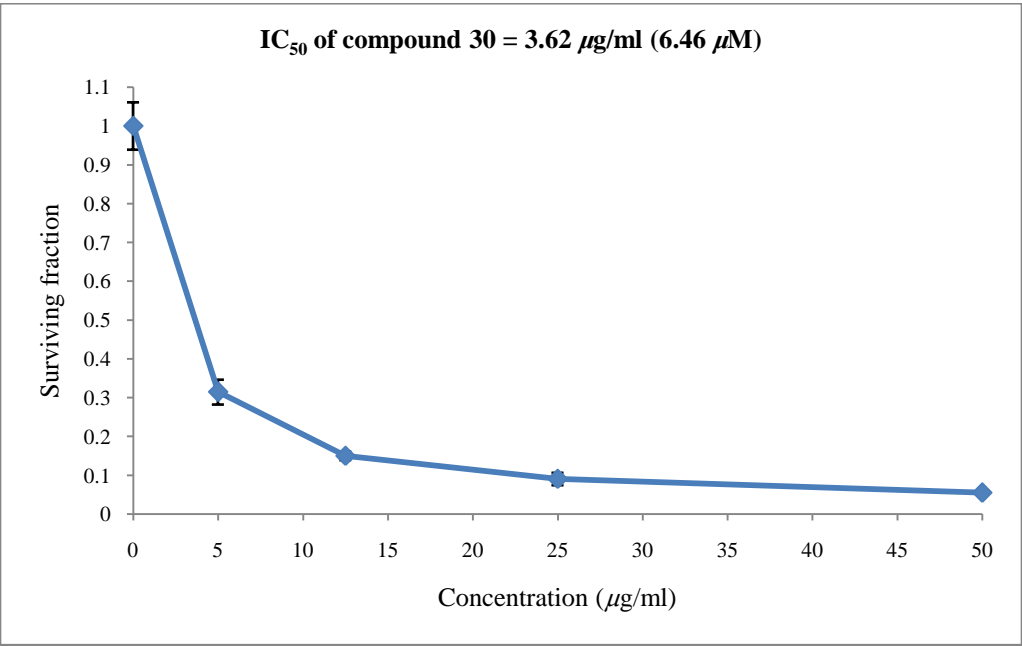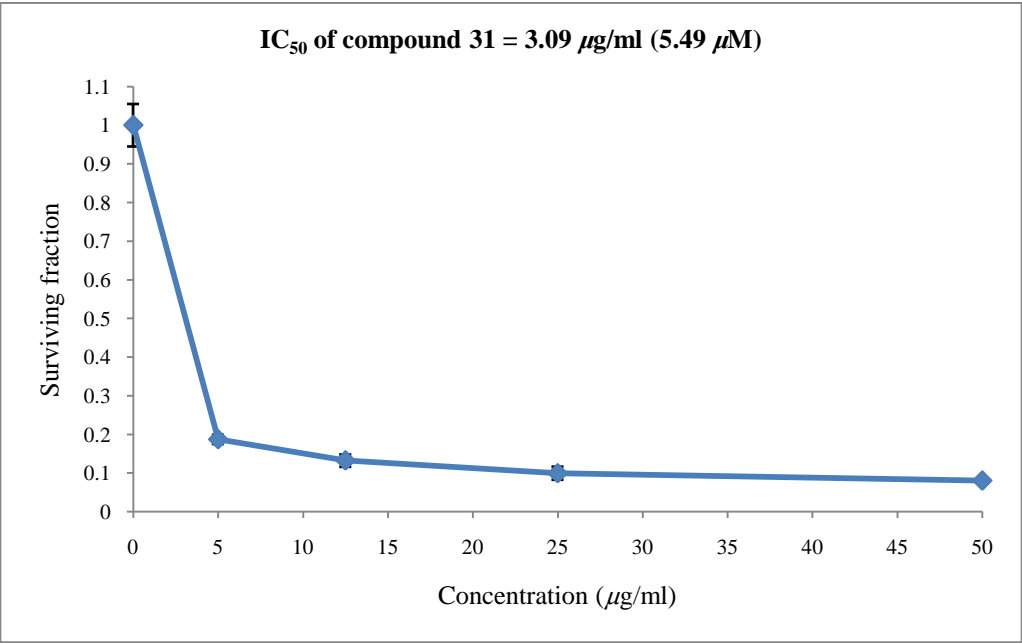

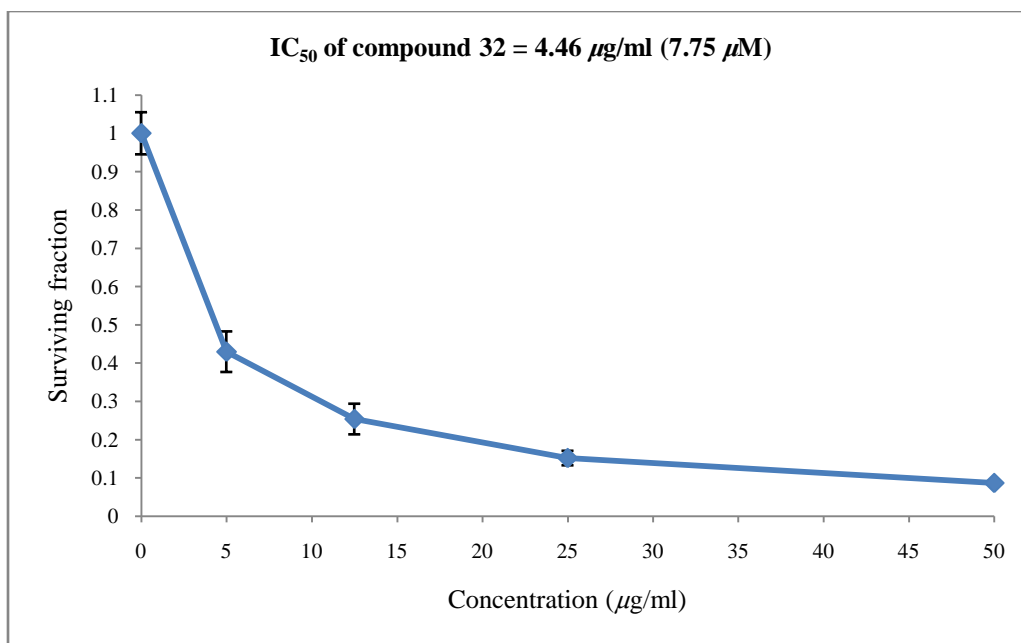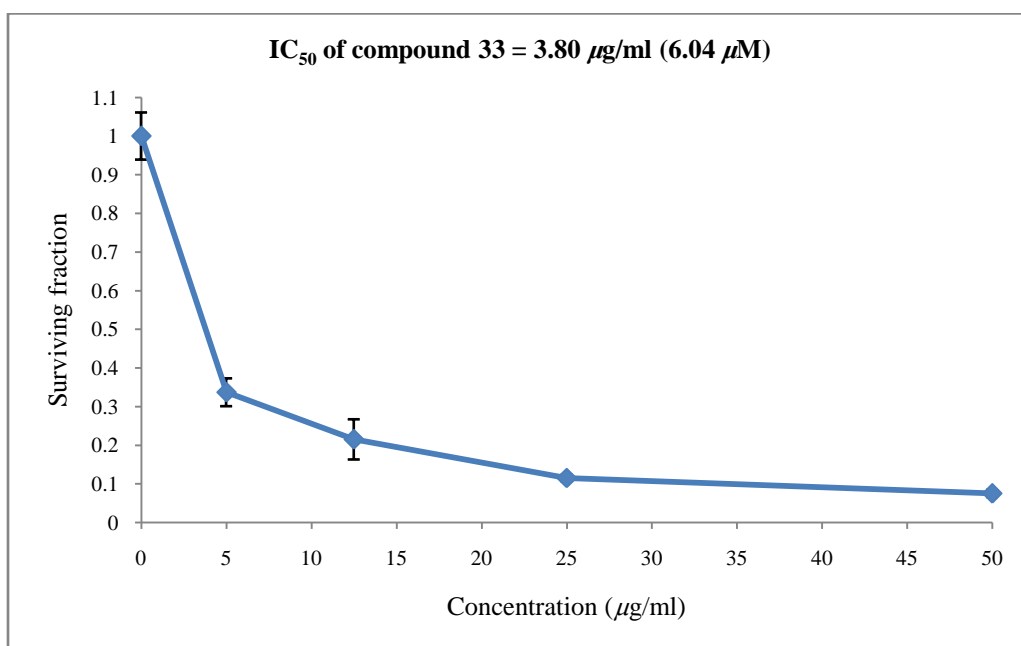

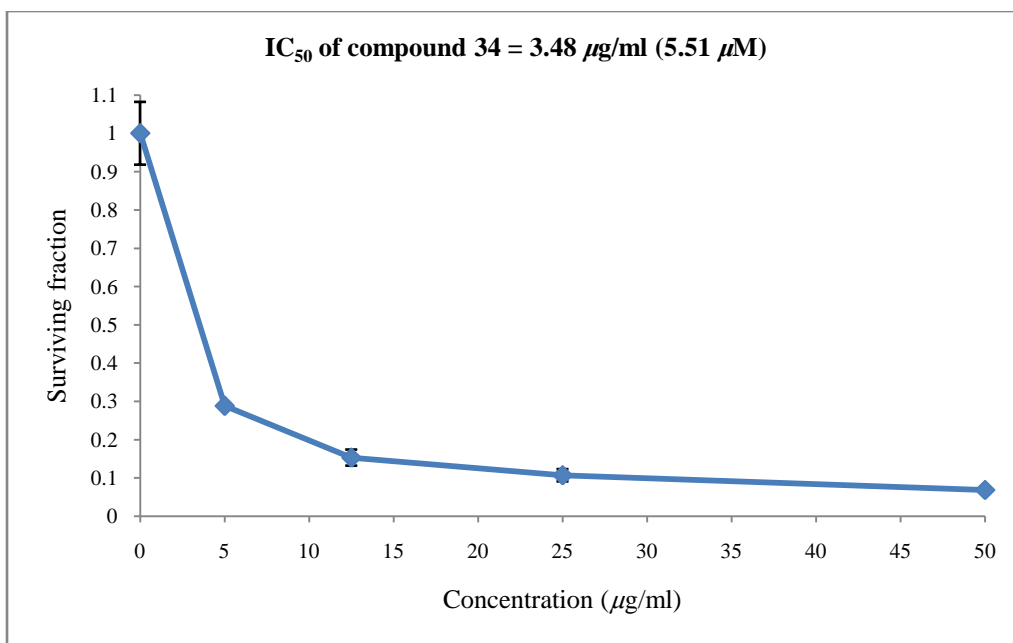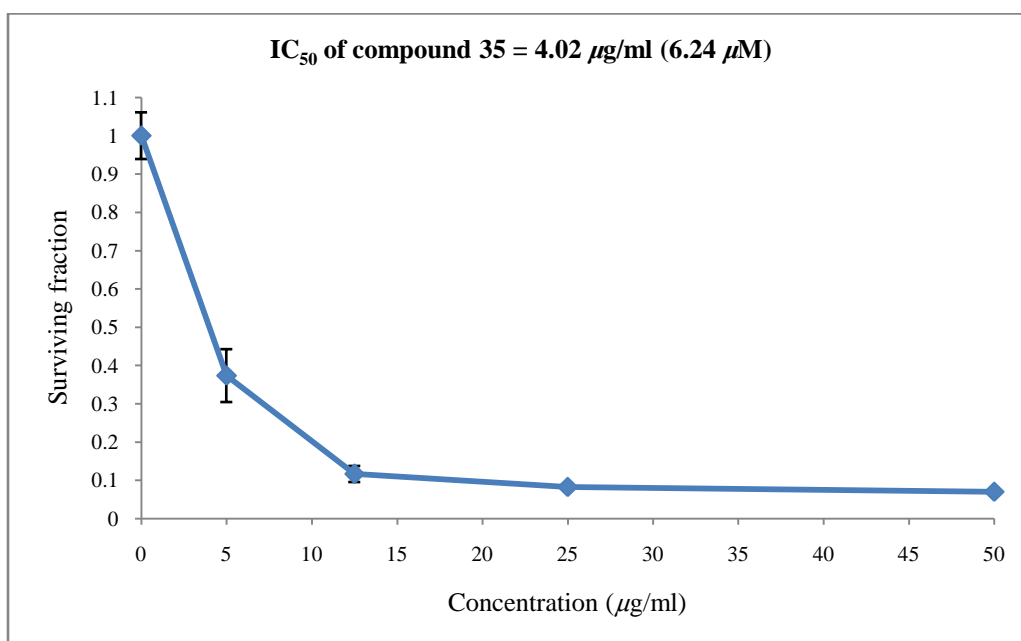

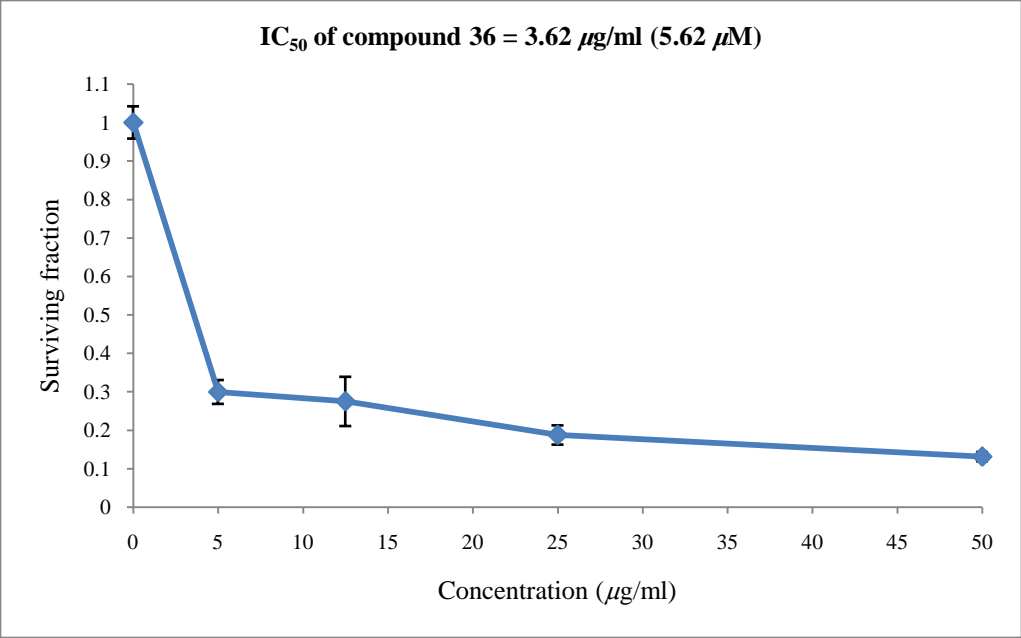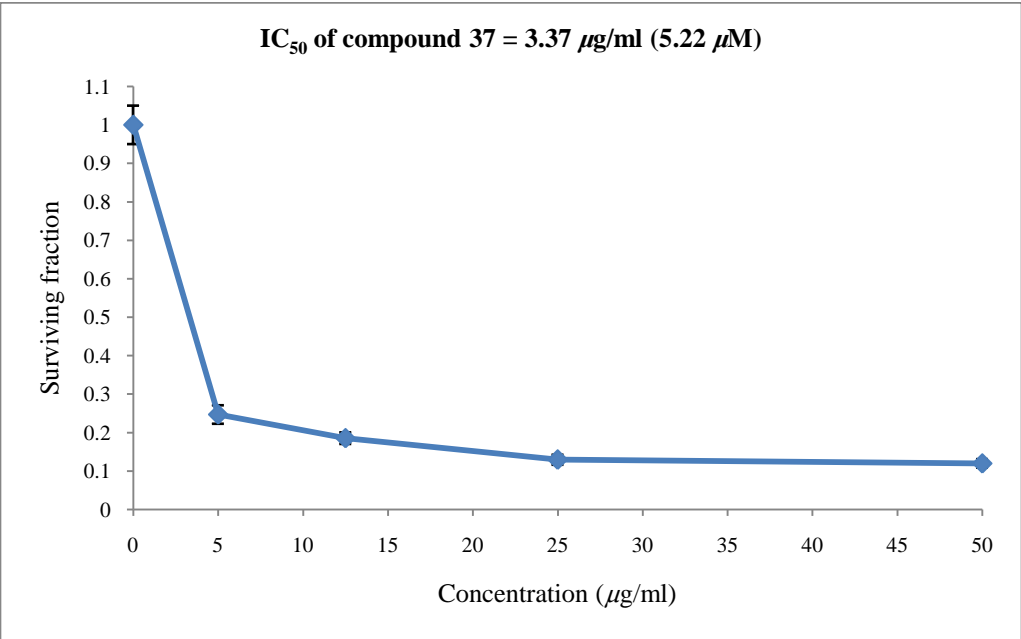

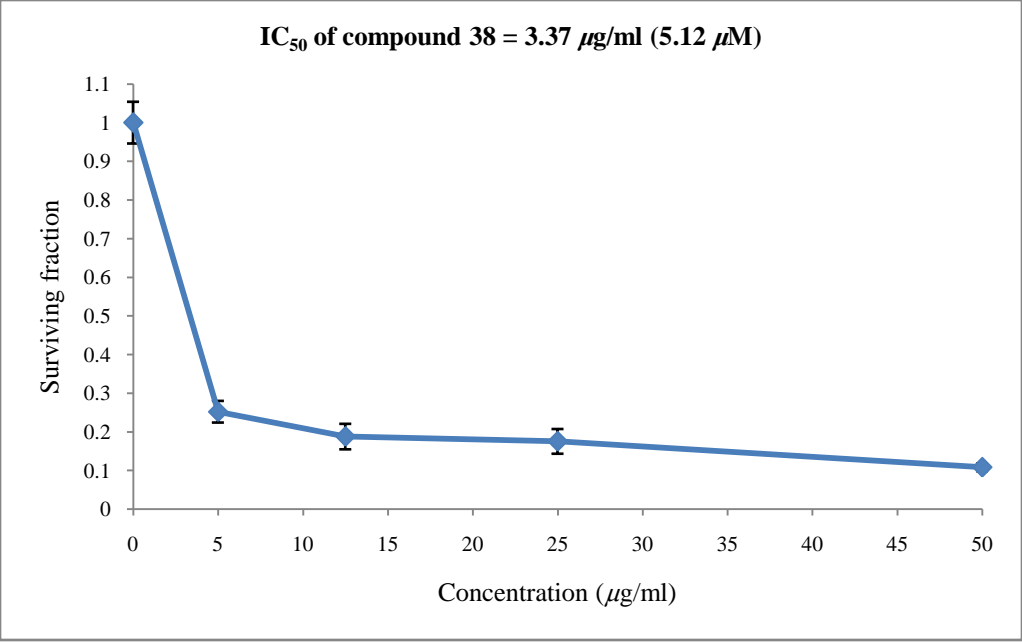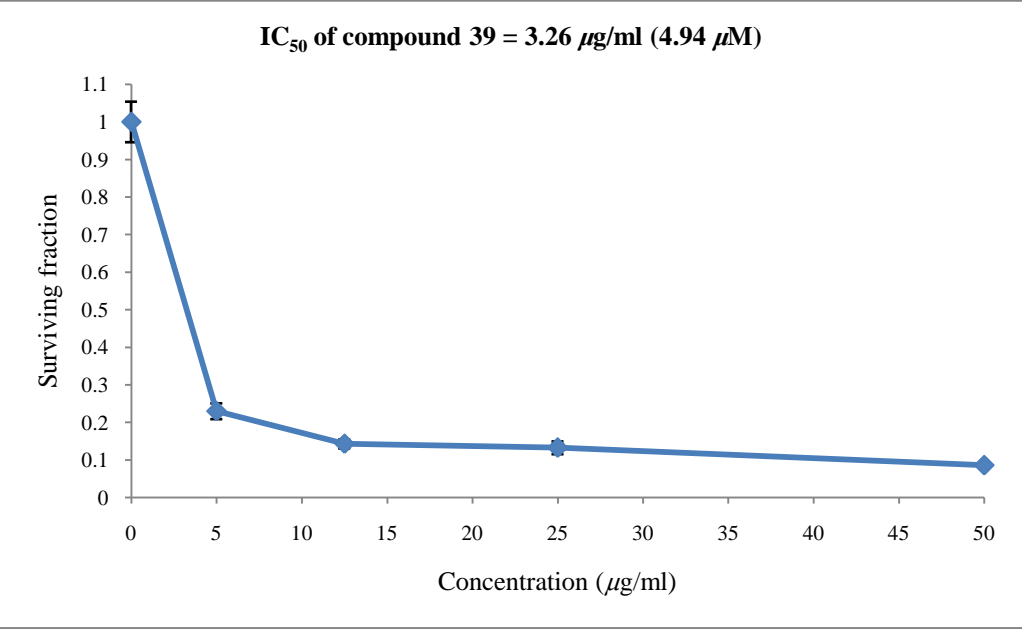

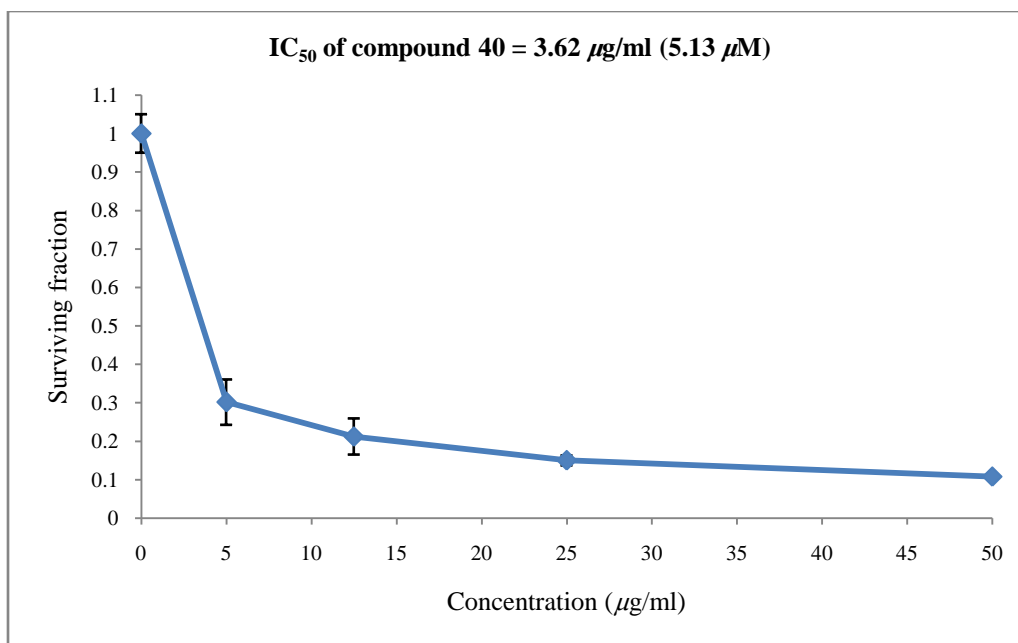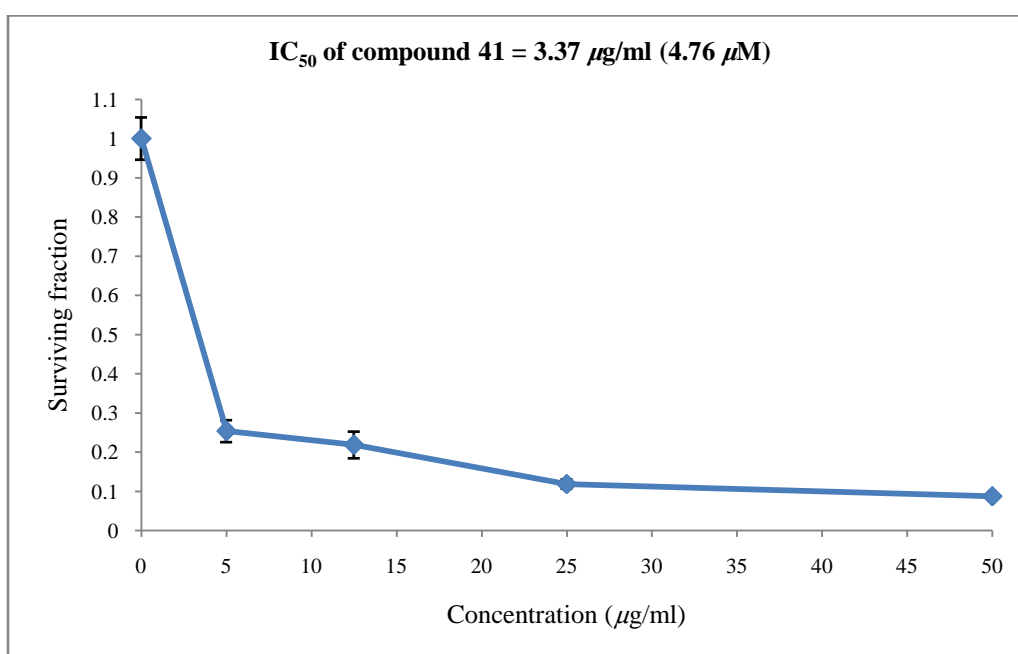



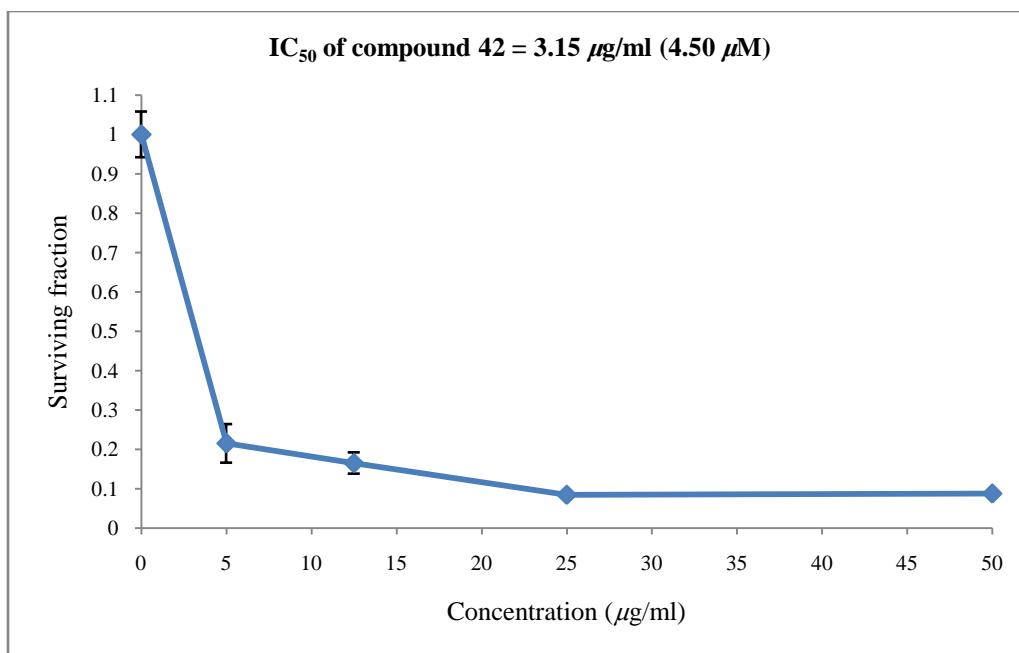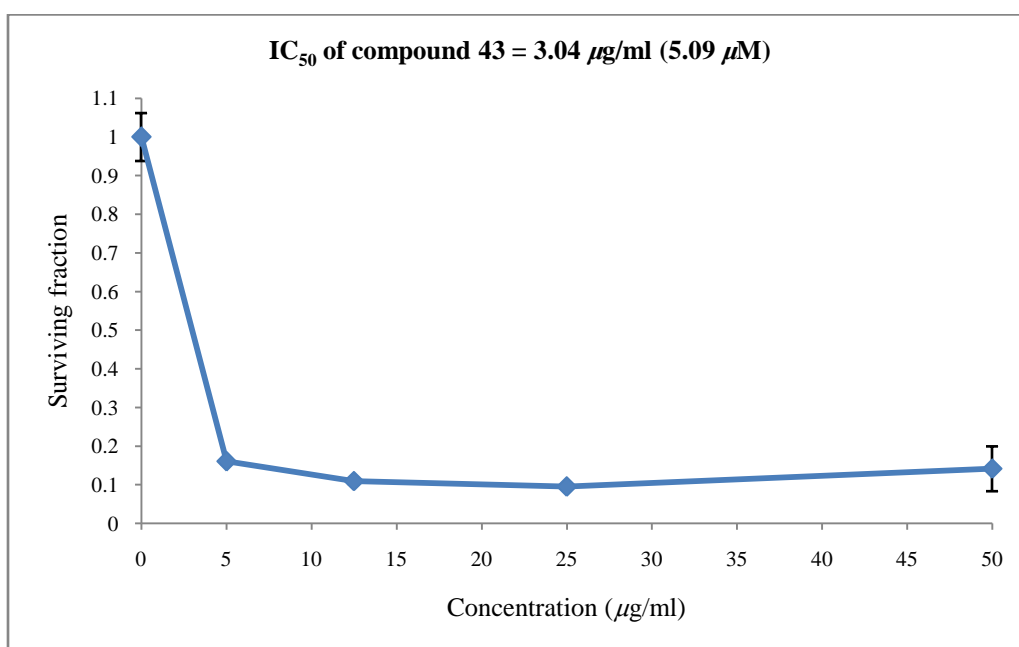

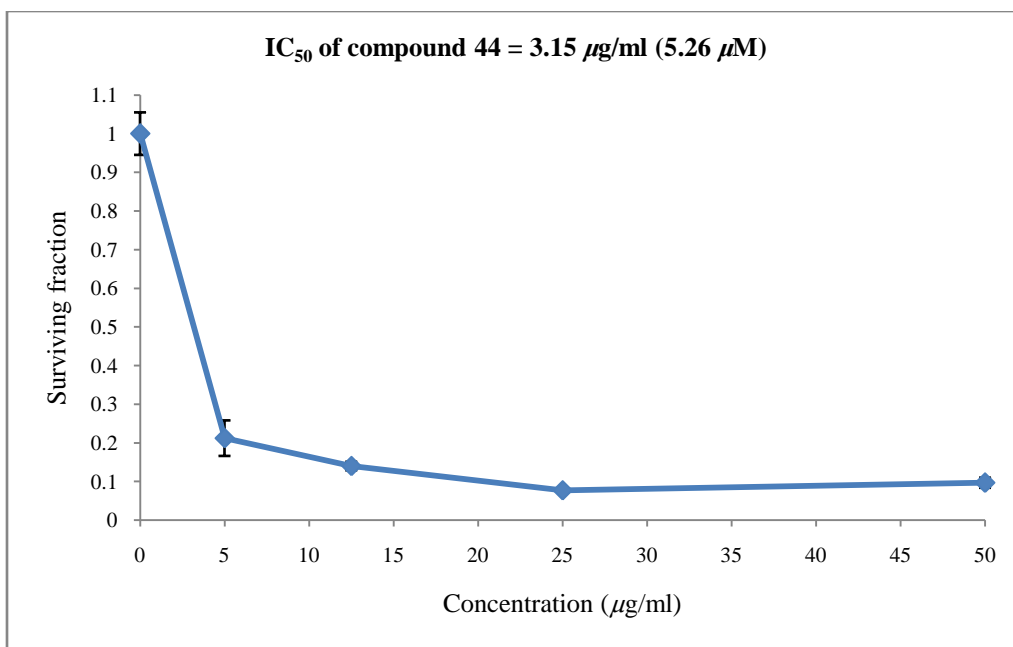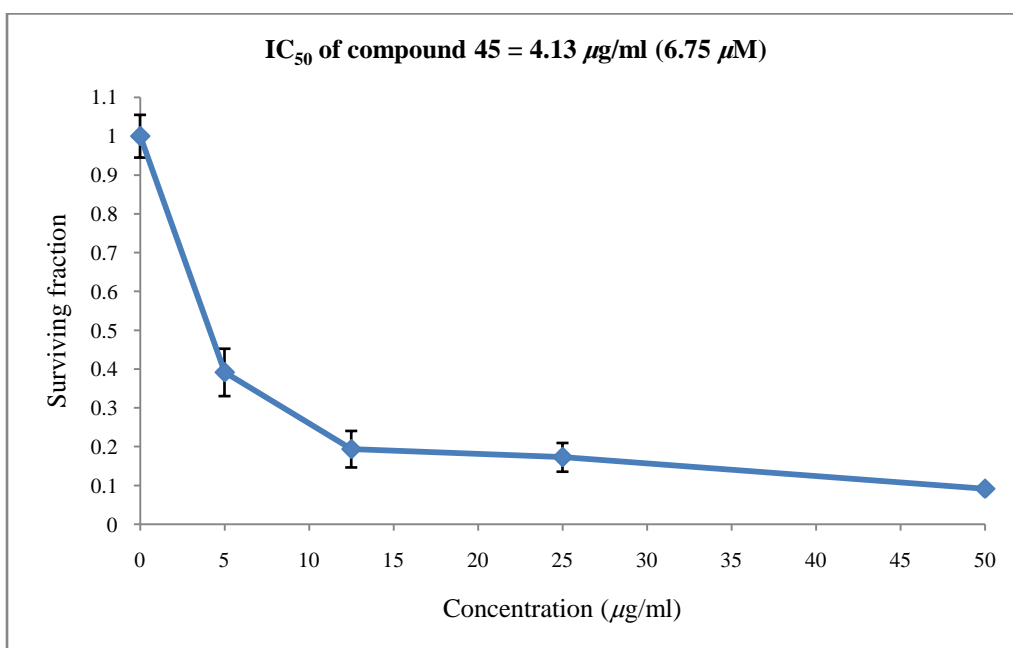

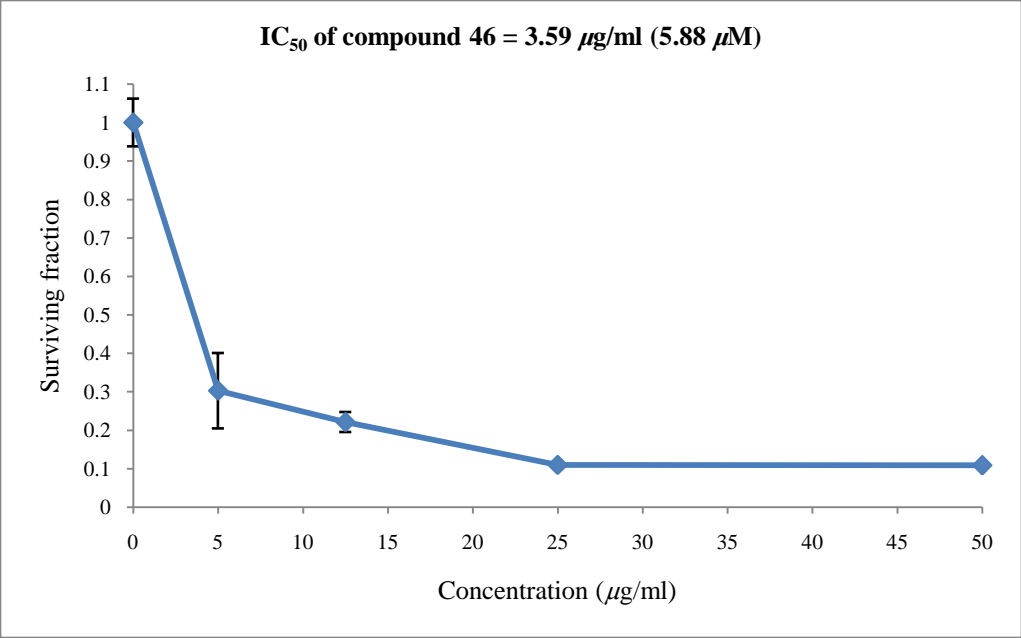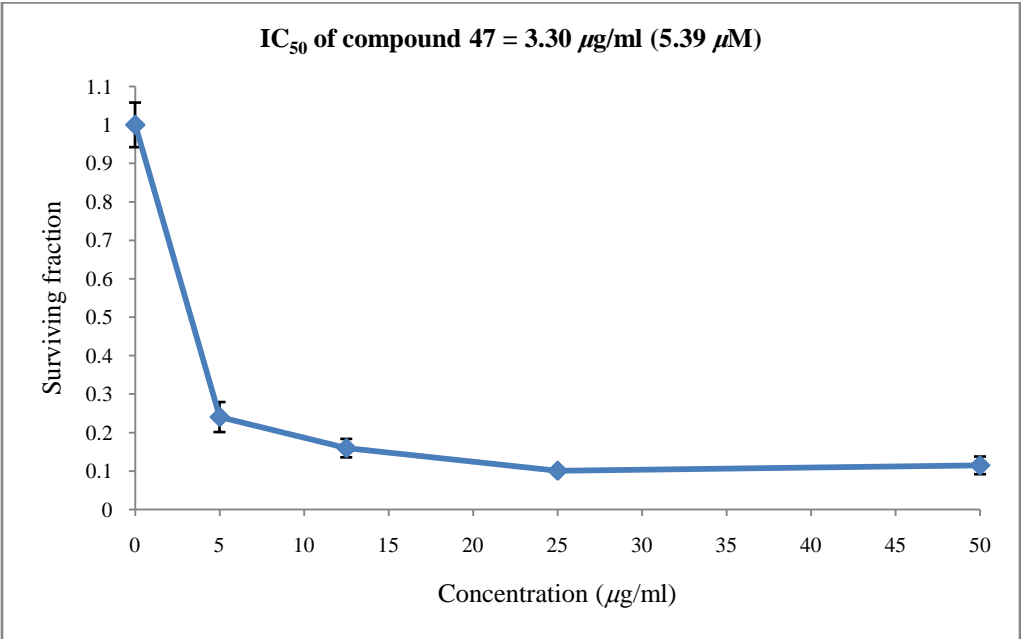

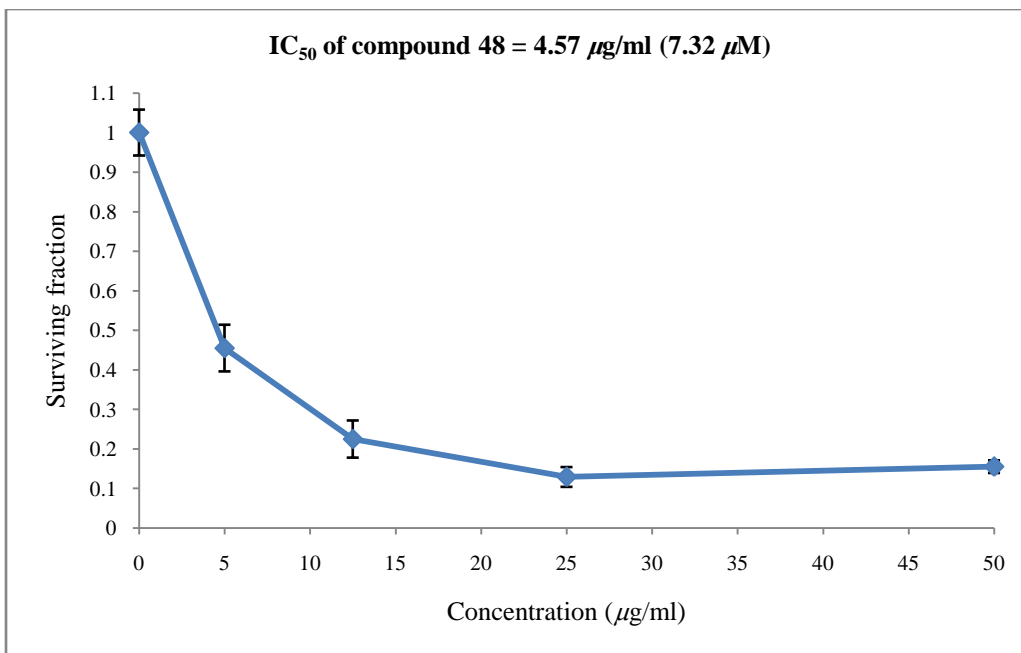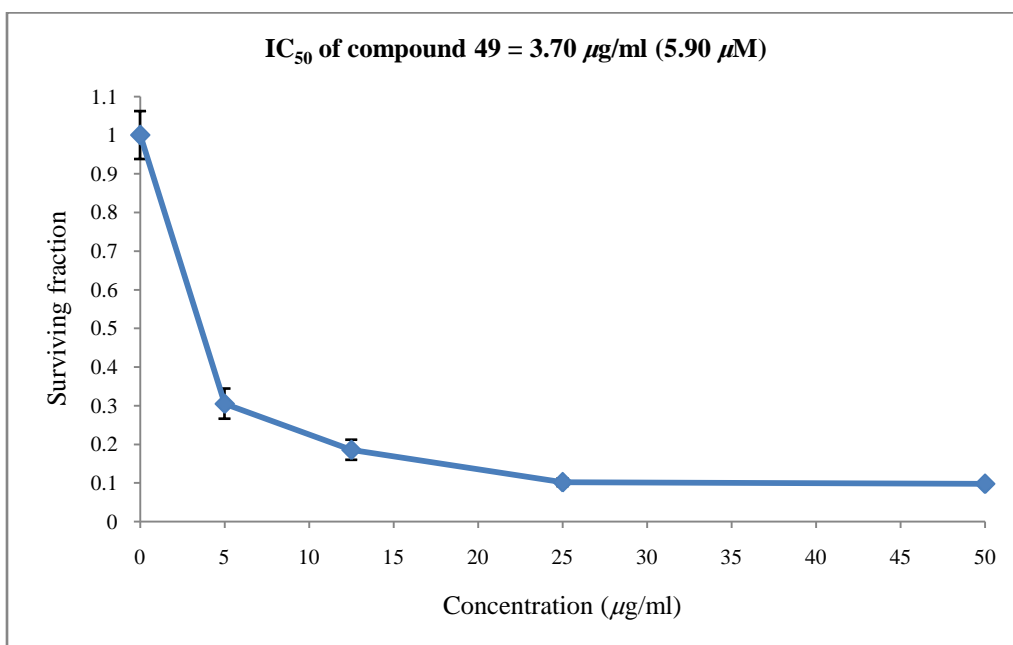

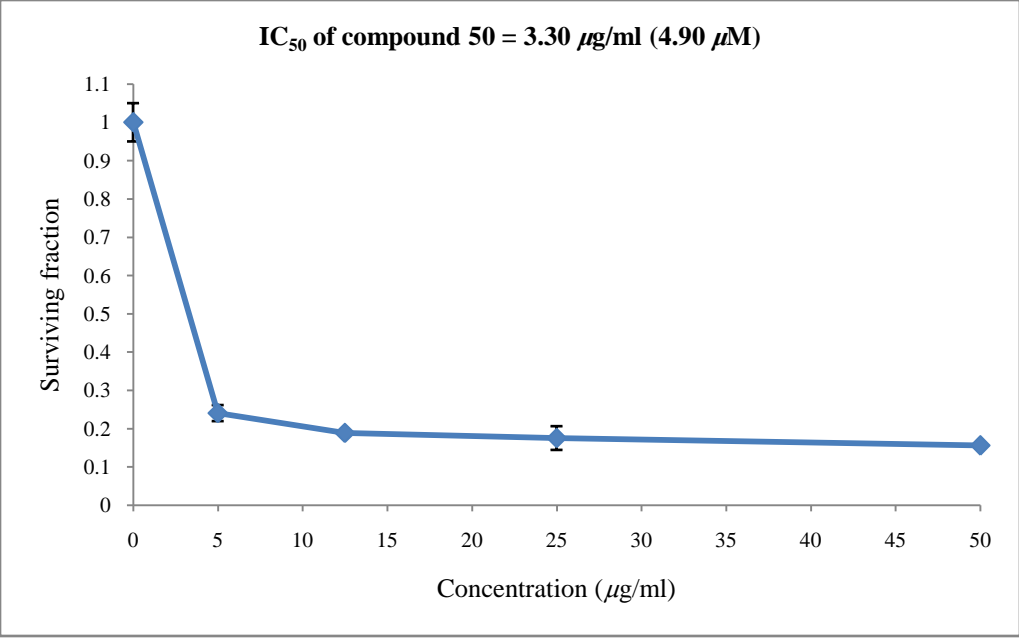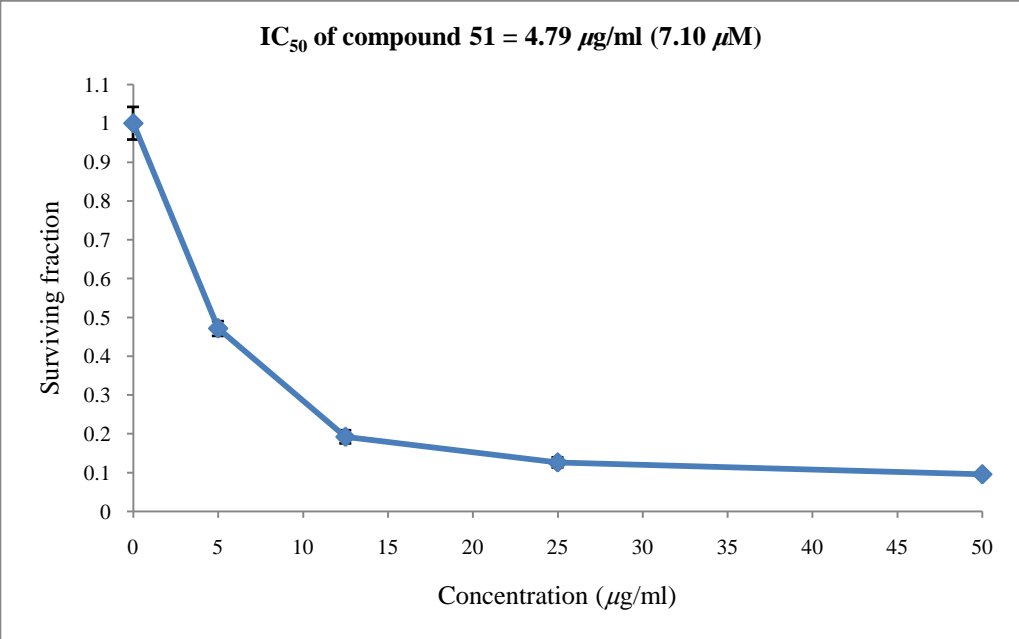

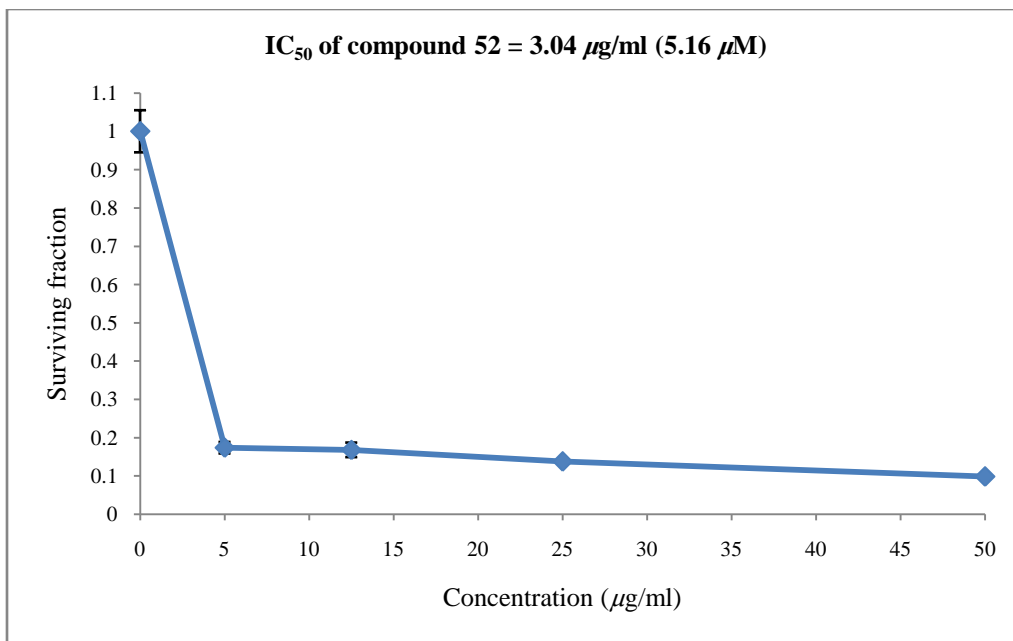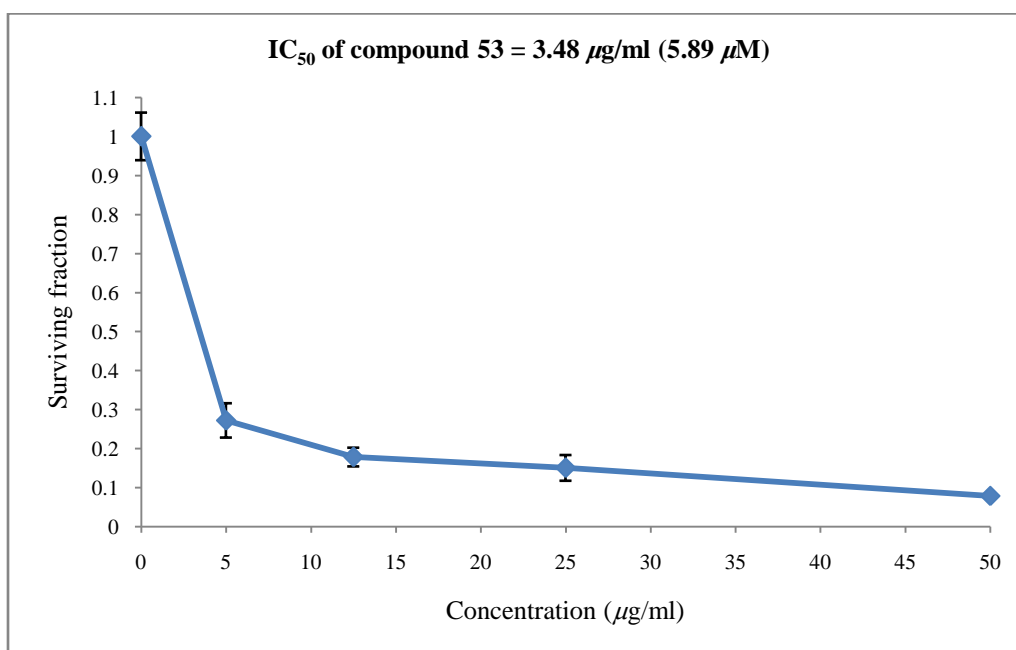

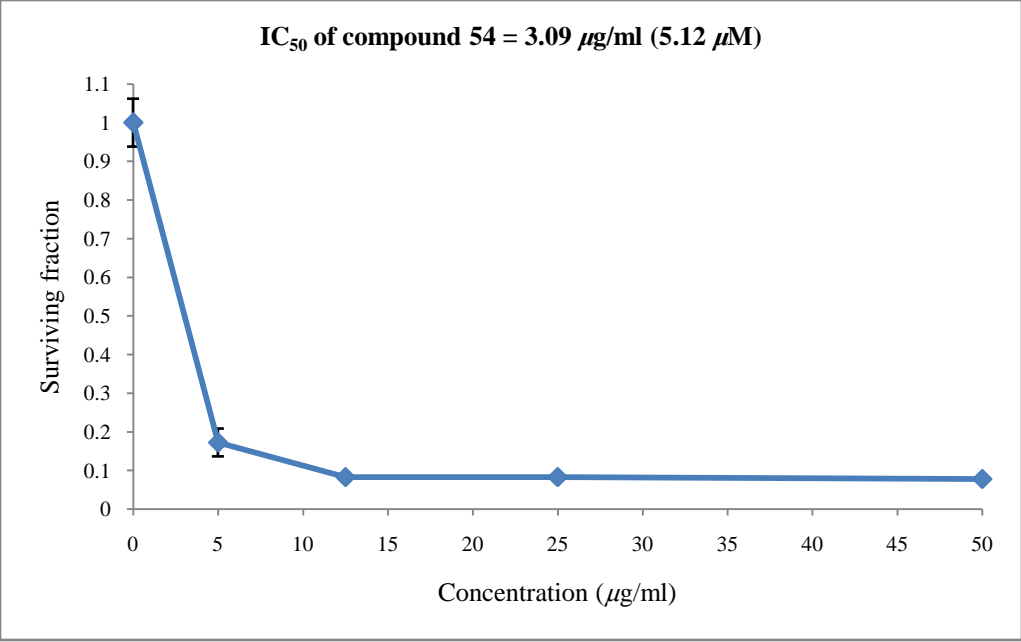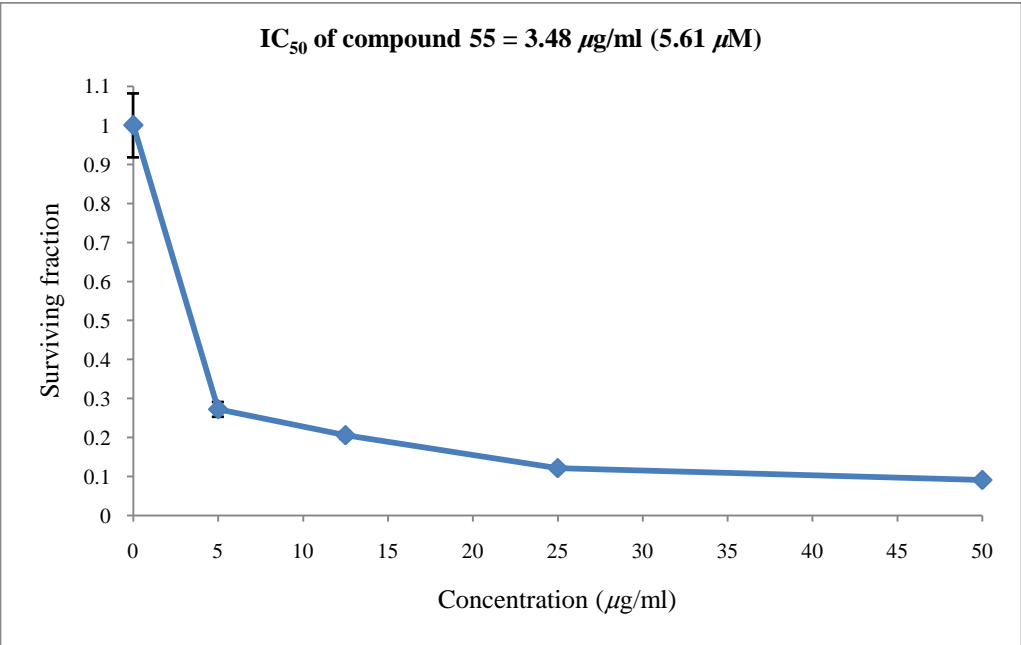

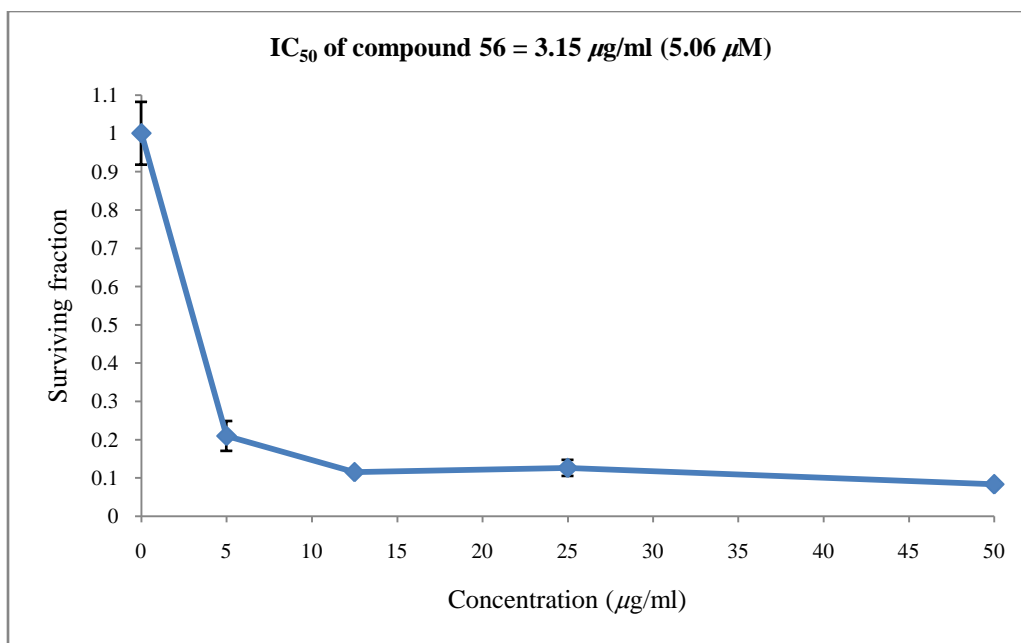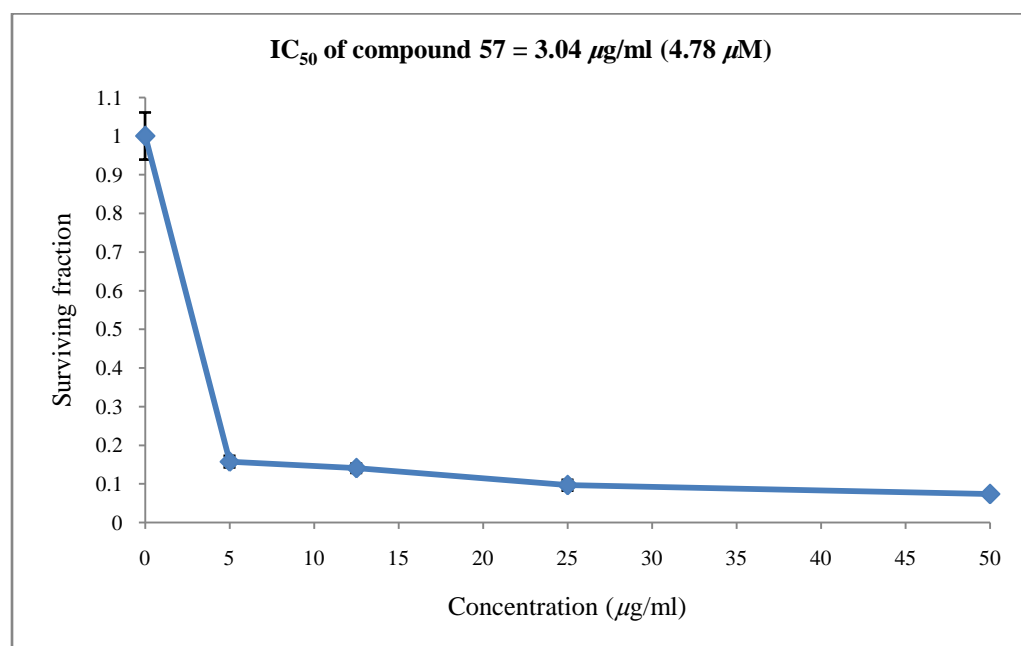



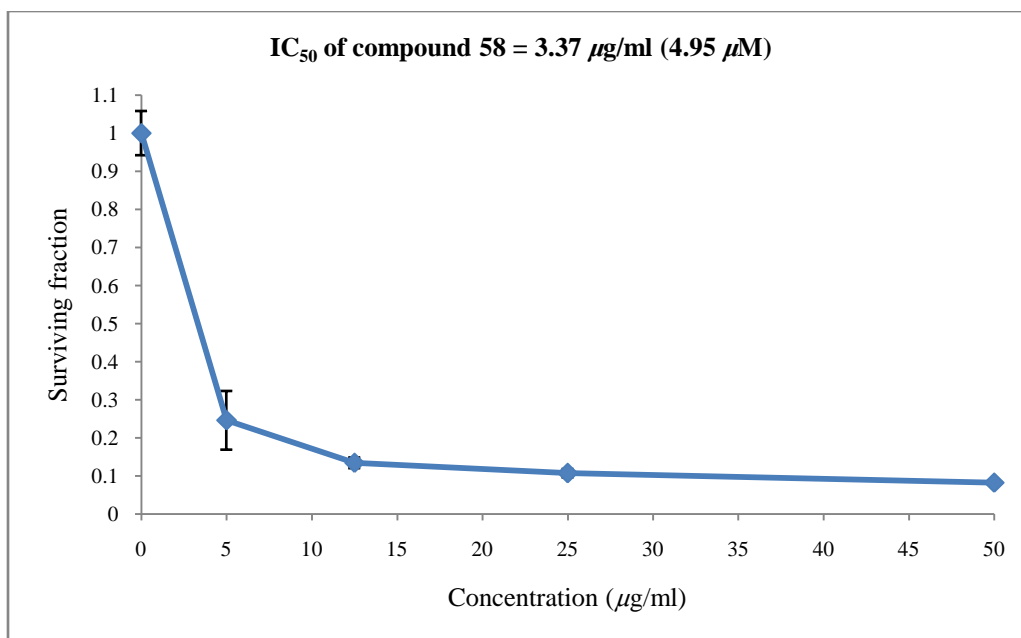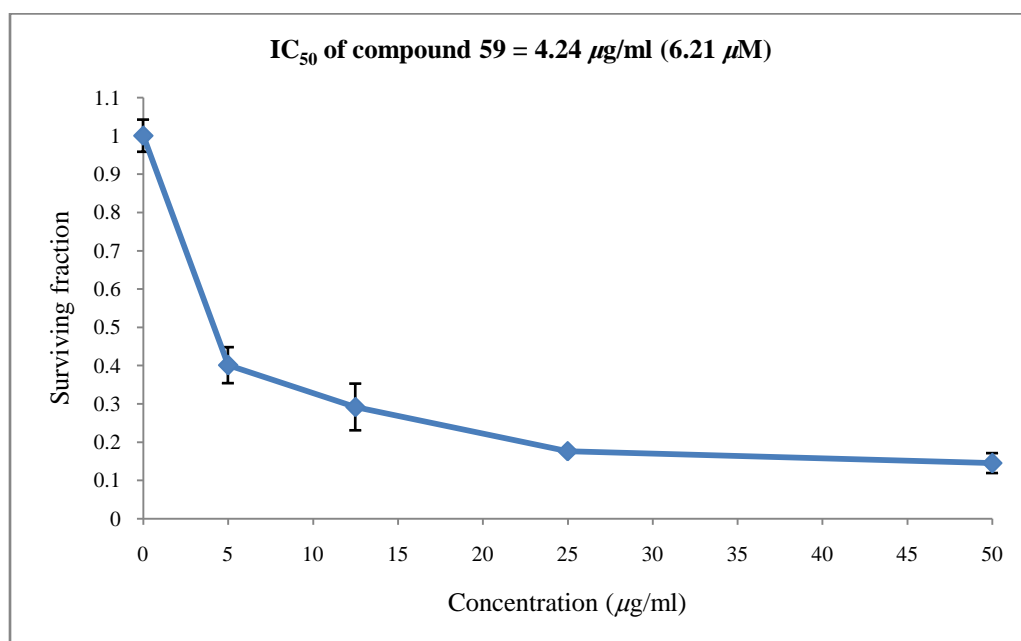

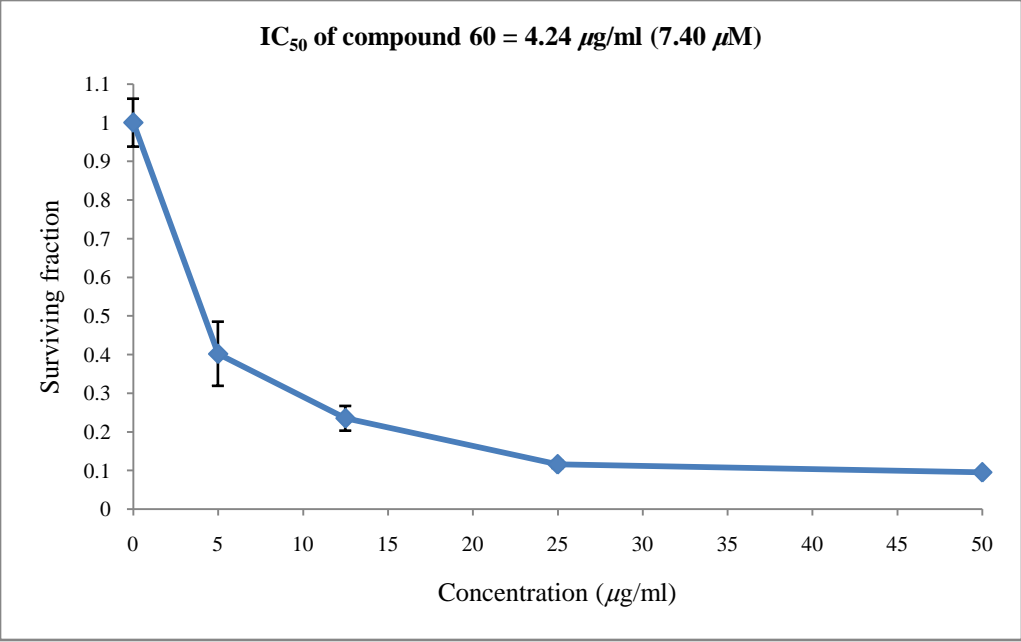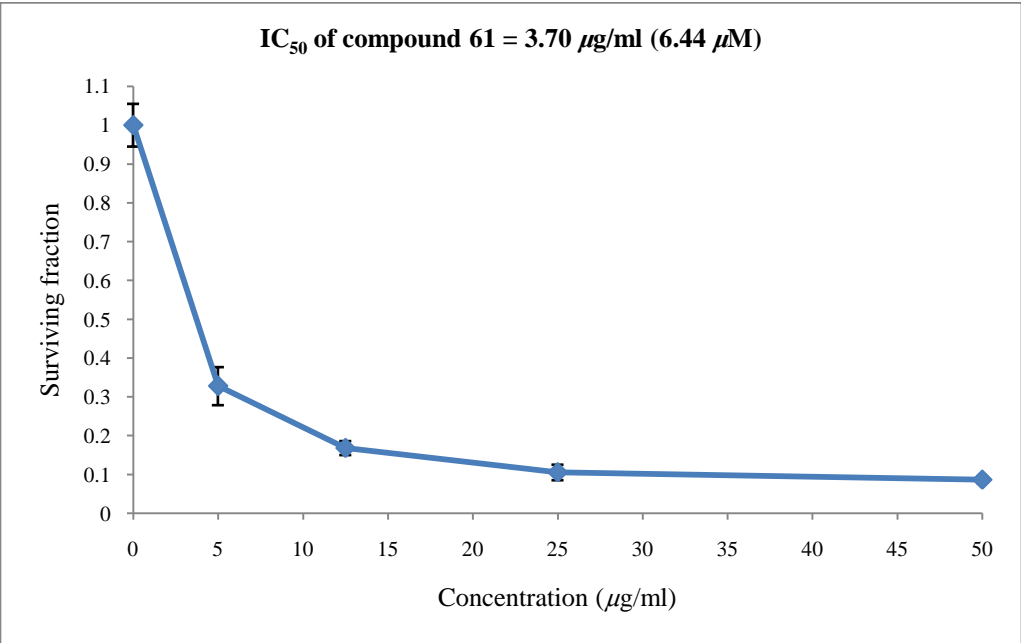

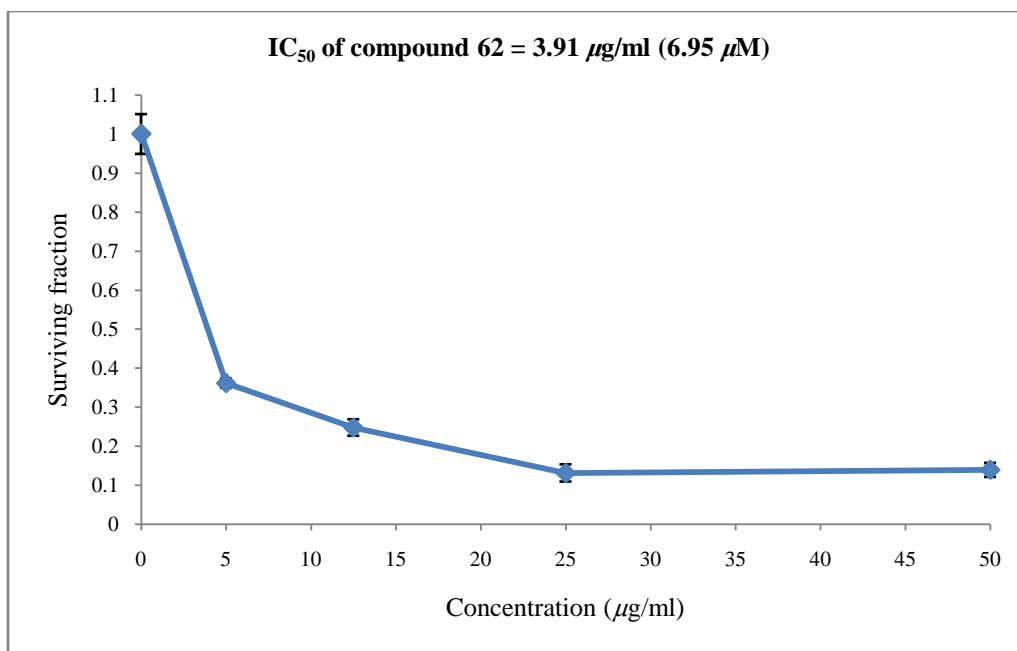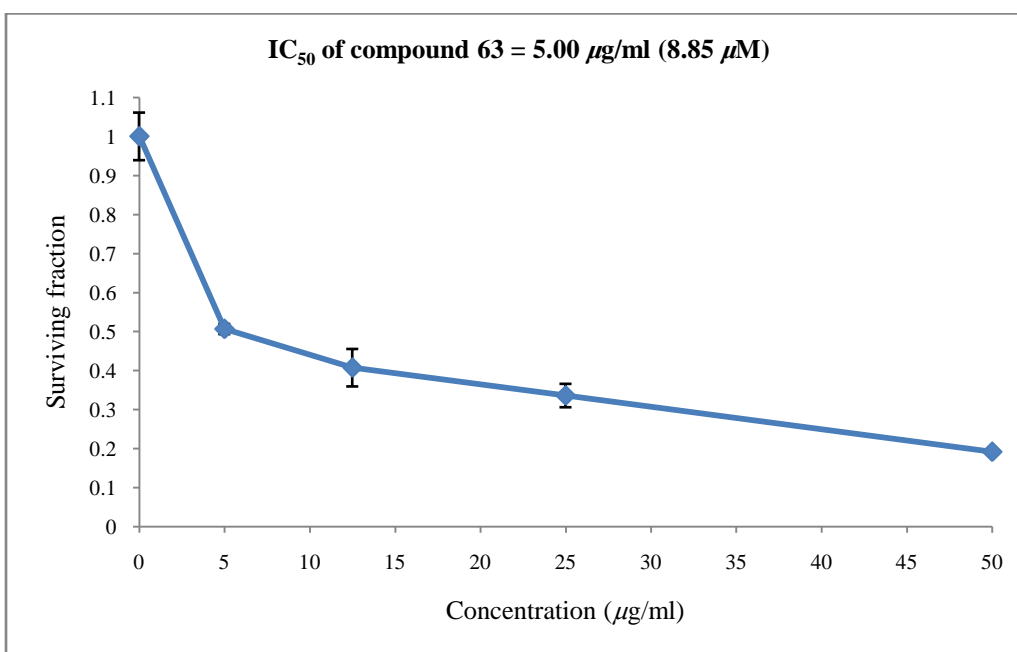

**Figure 114.** Dose-response curve for the synthesized compounds **30-63** against HeLa (cervical cancer) cell line.

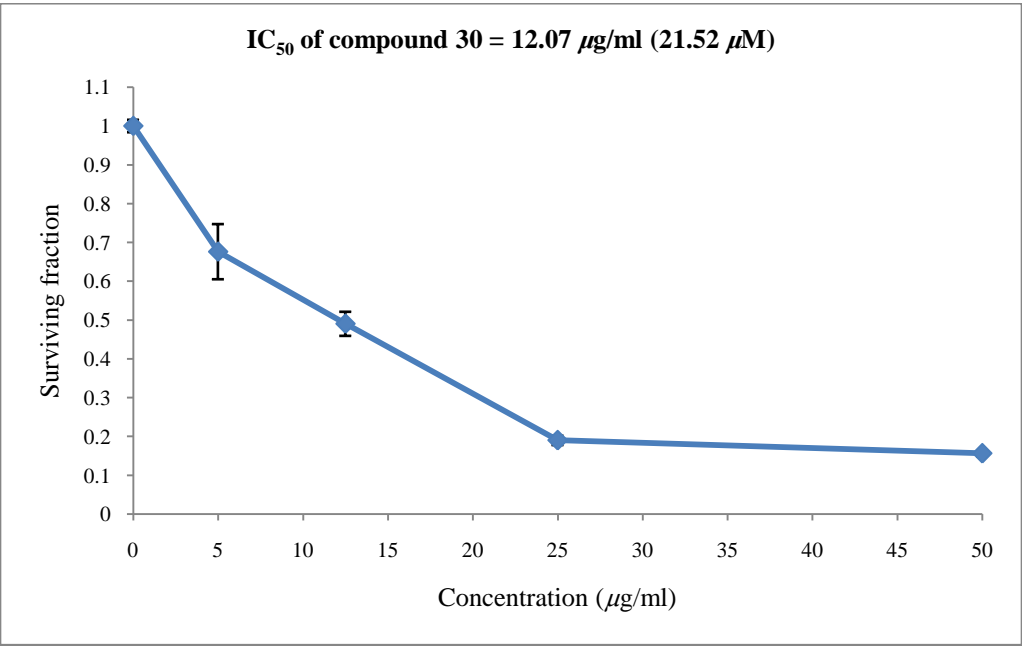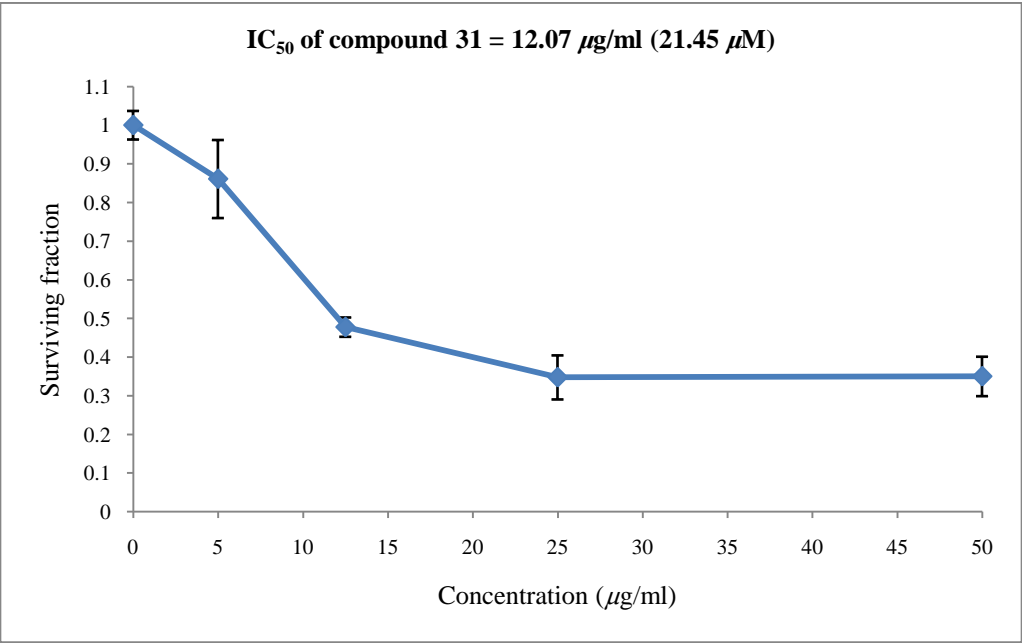

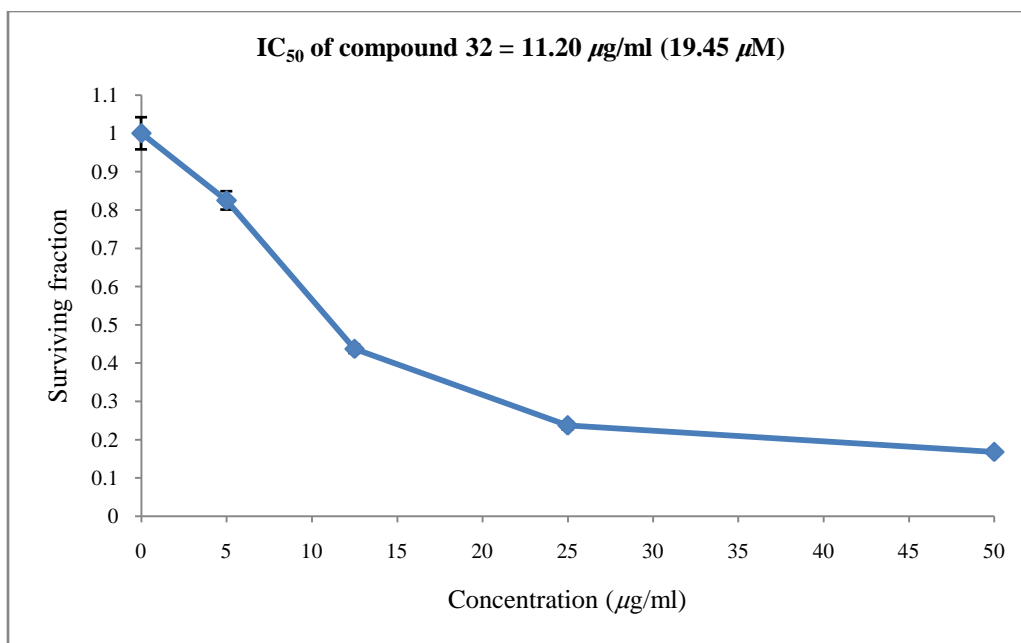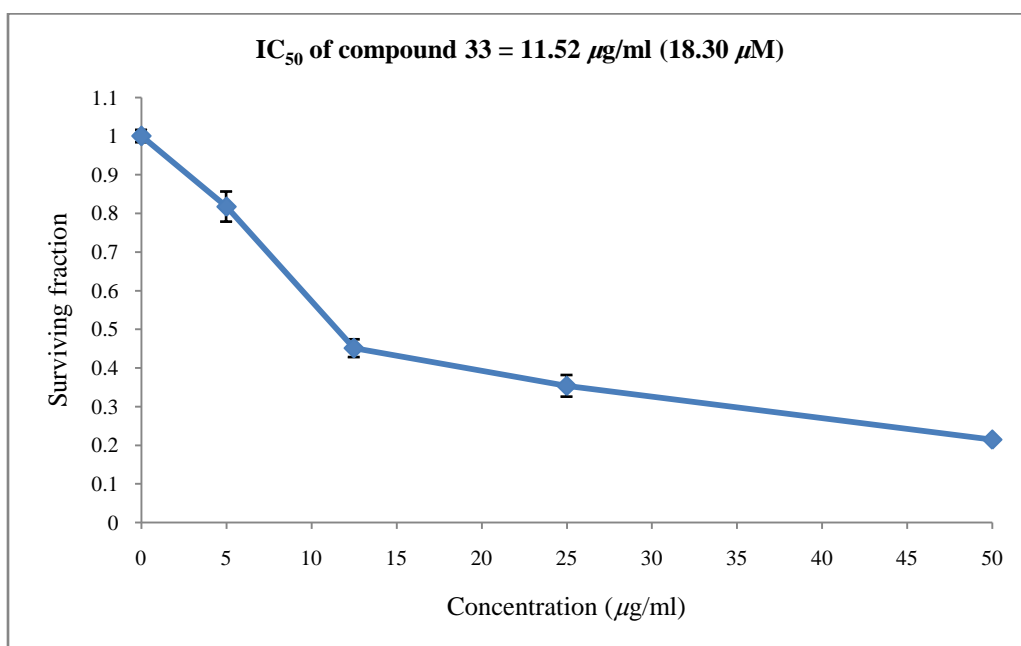

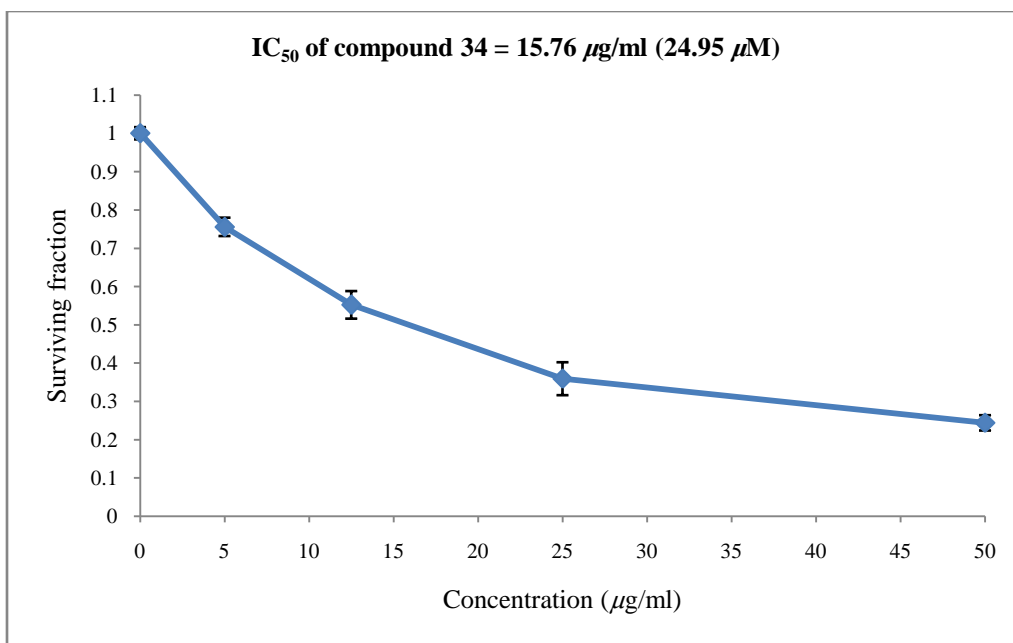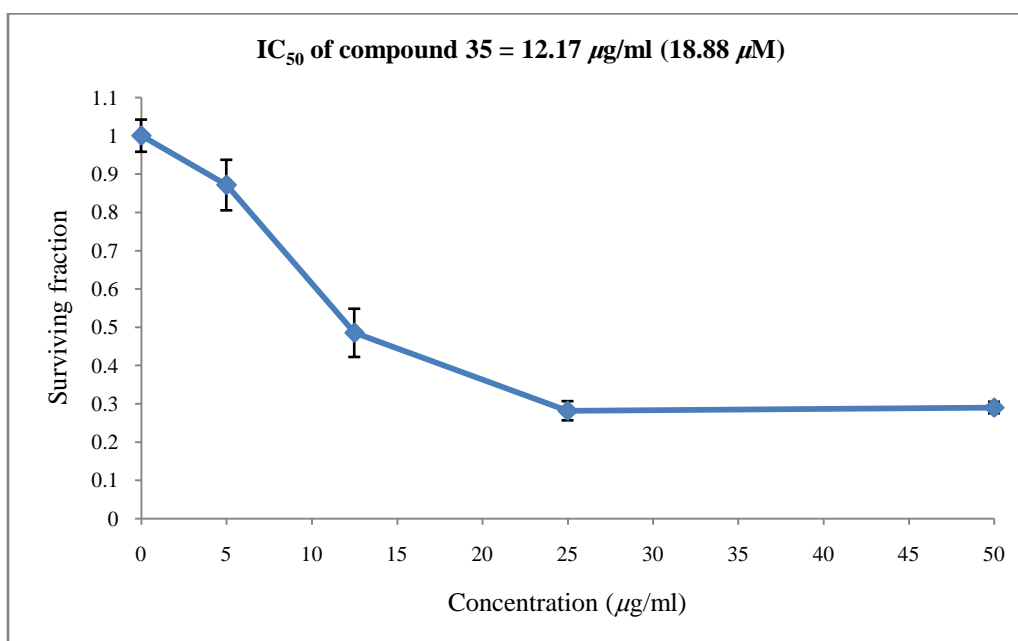

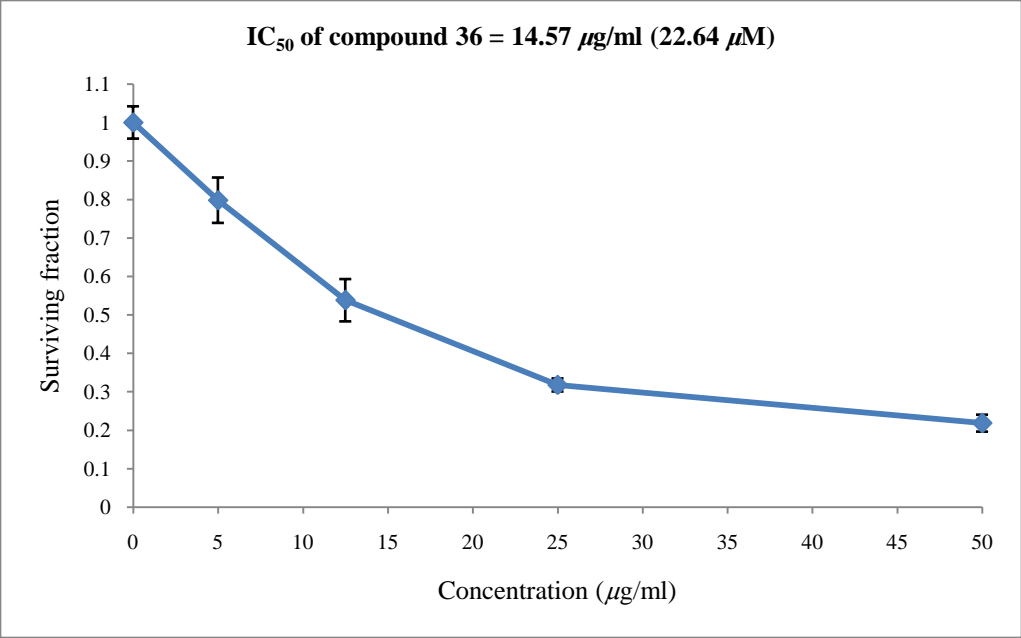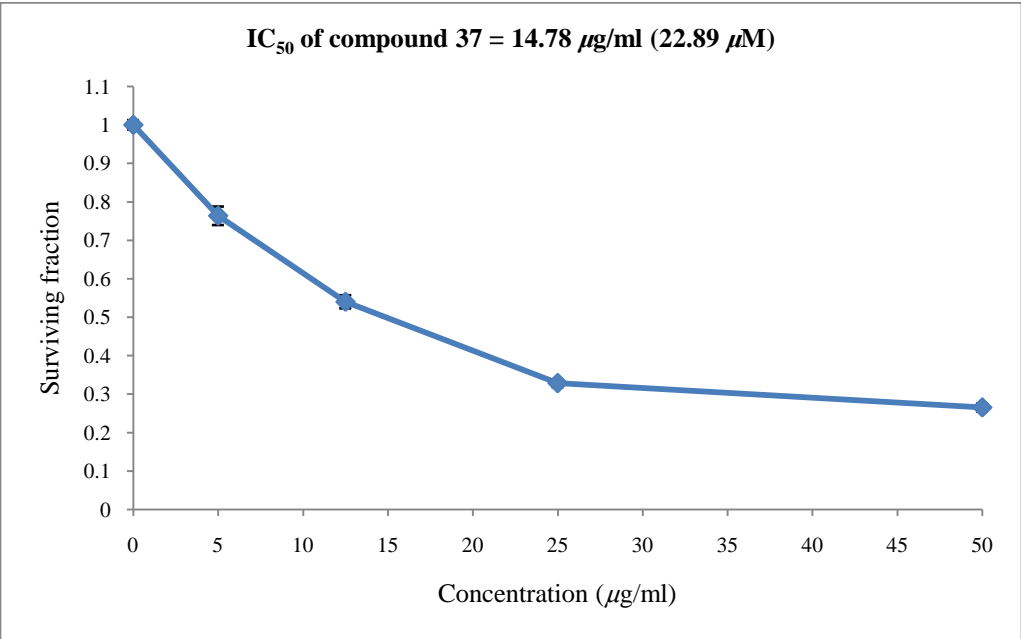

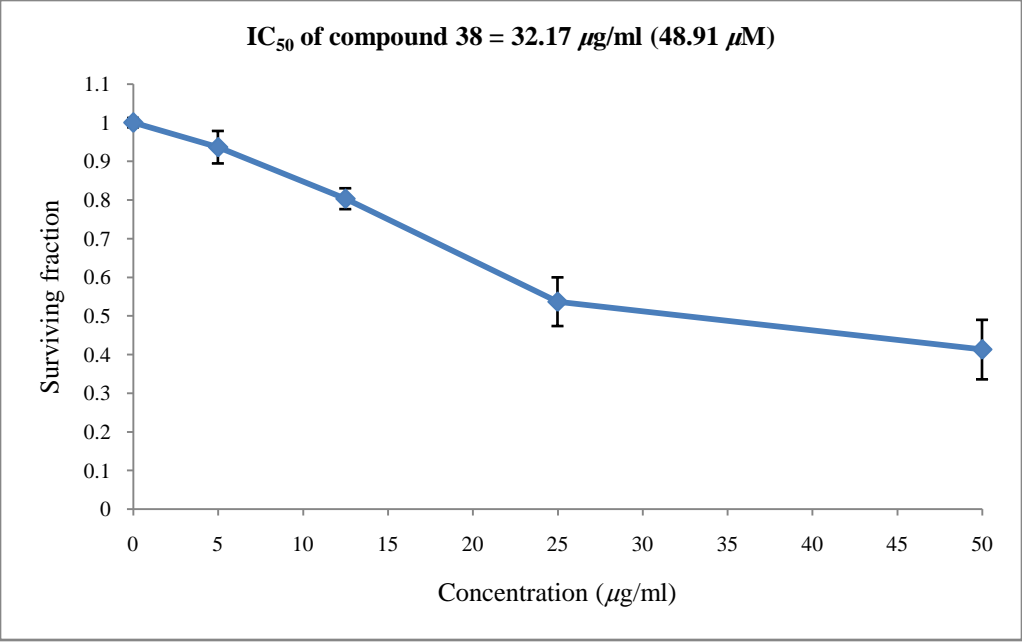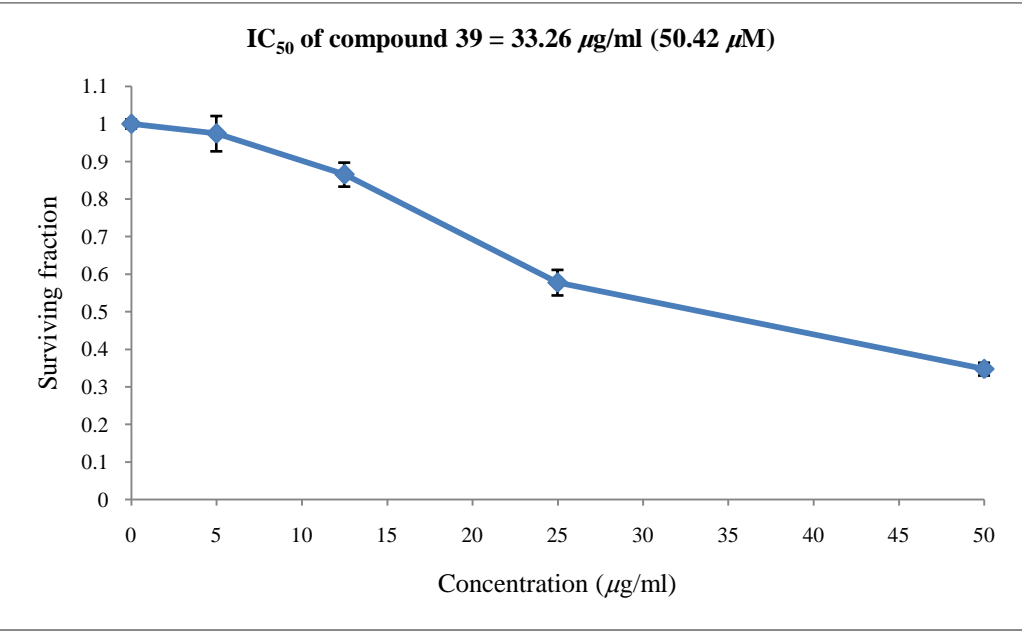



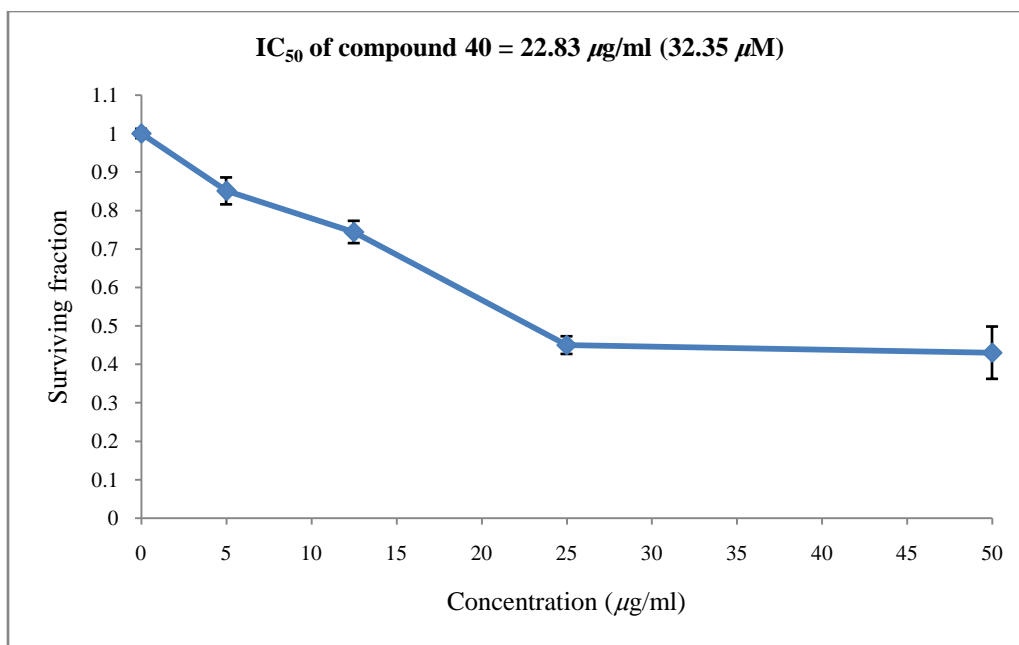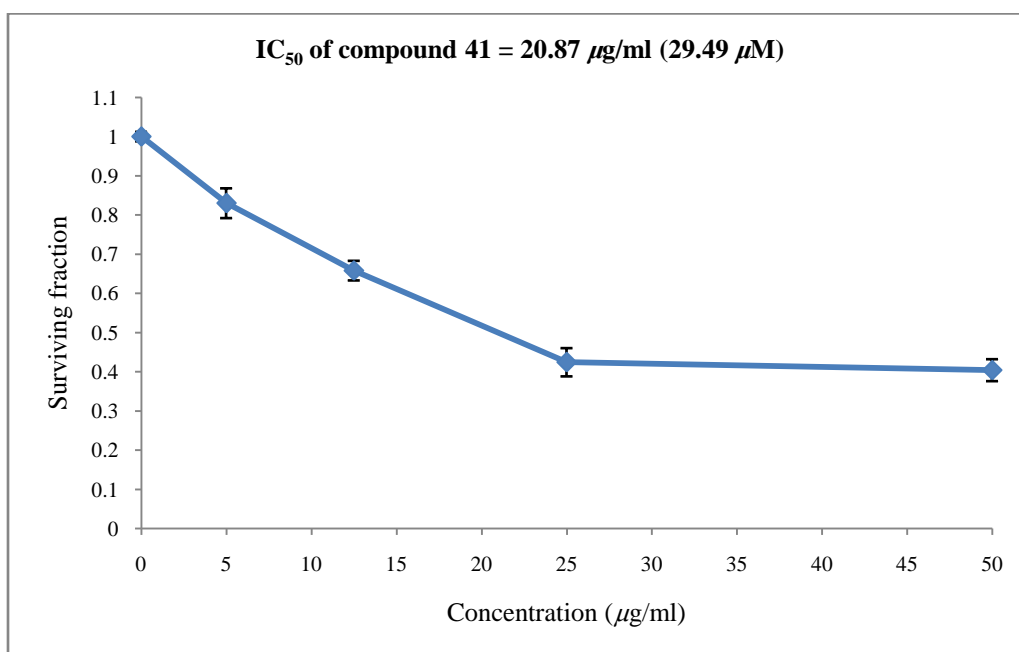

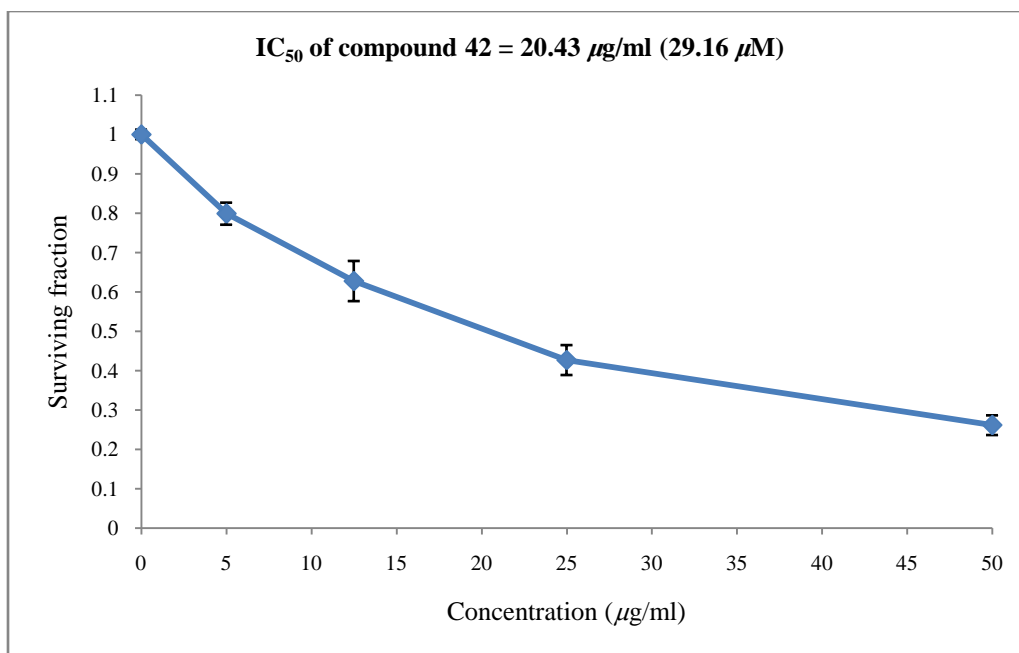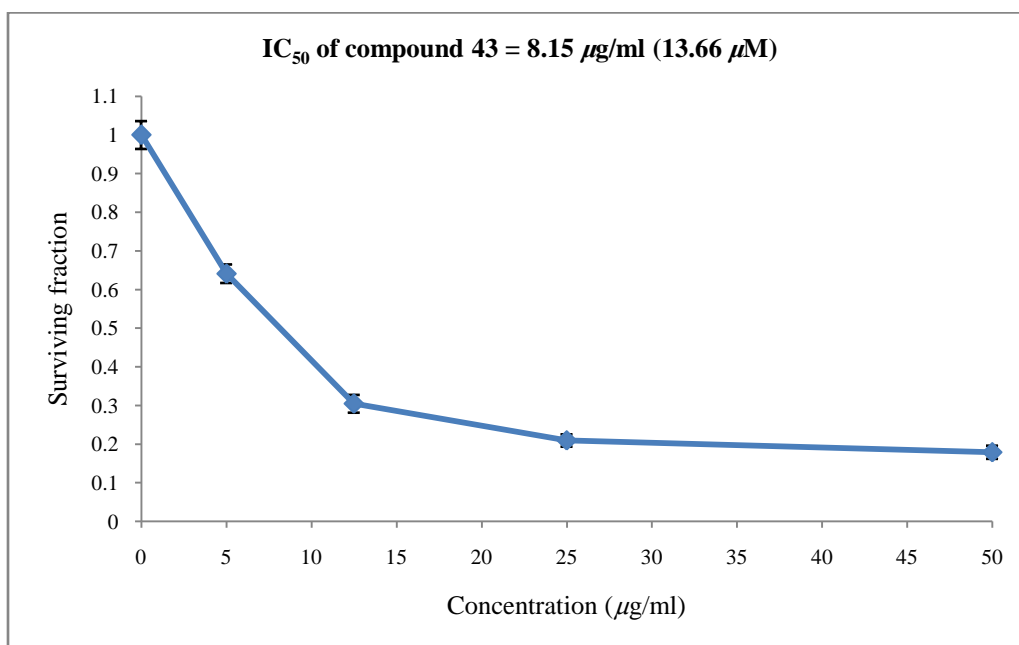

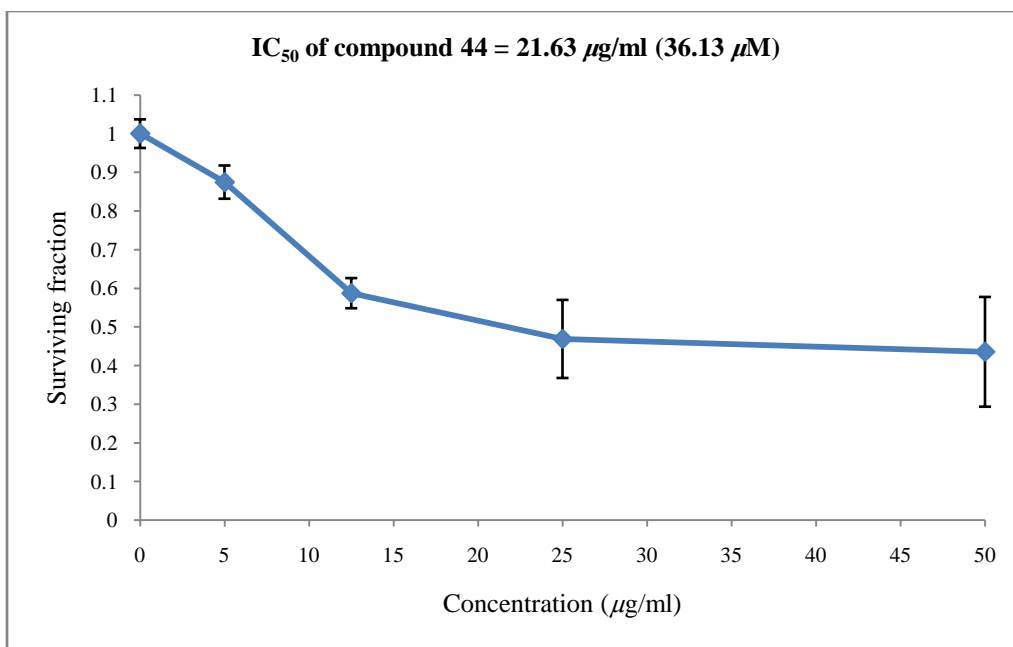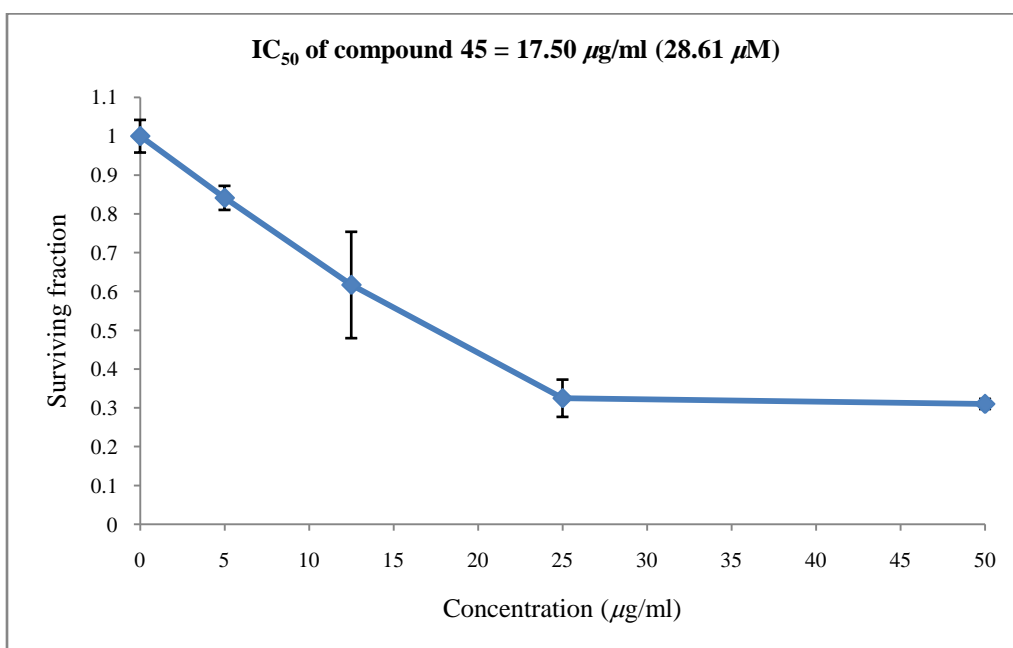

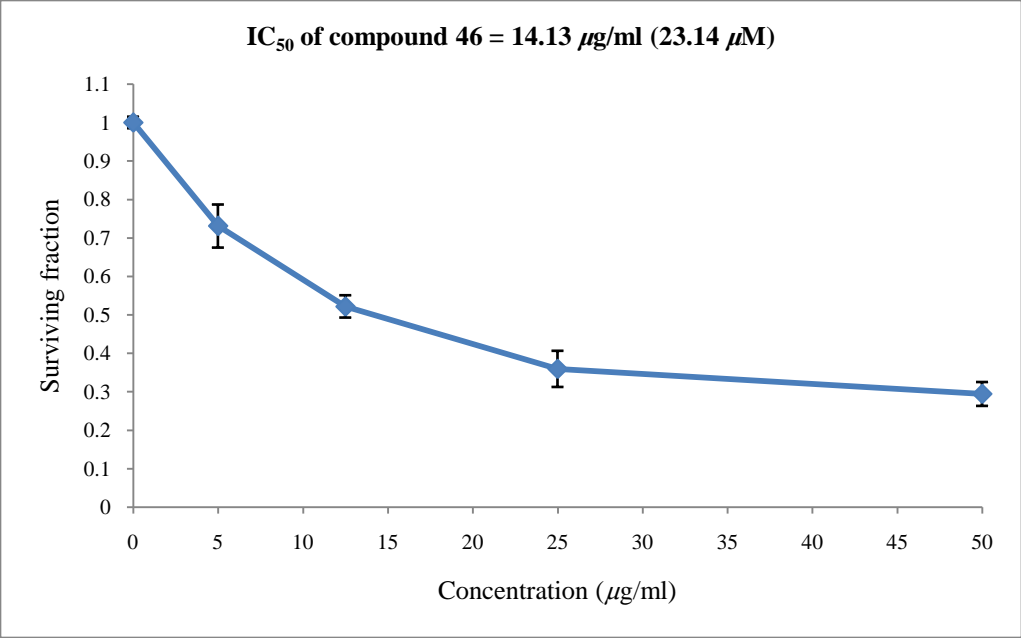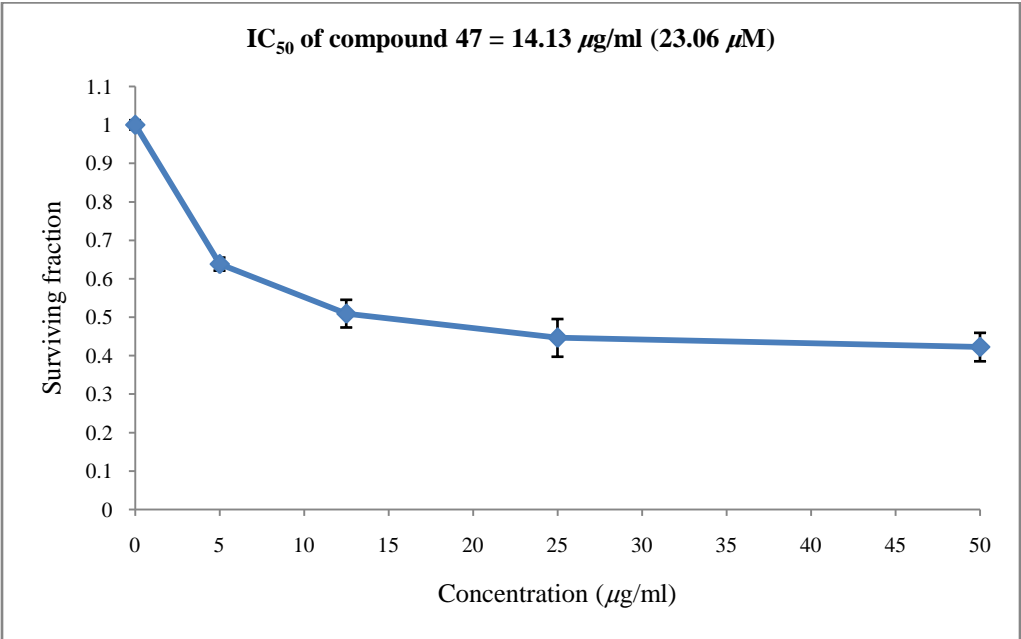

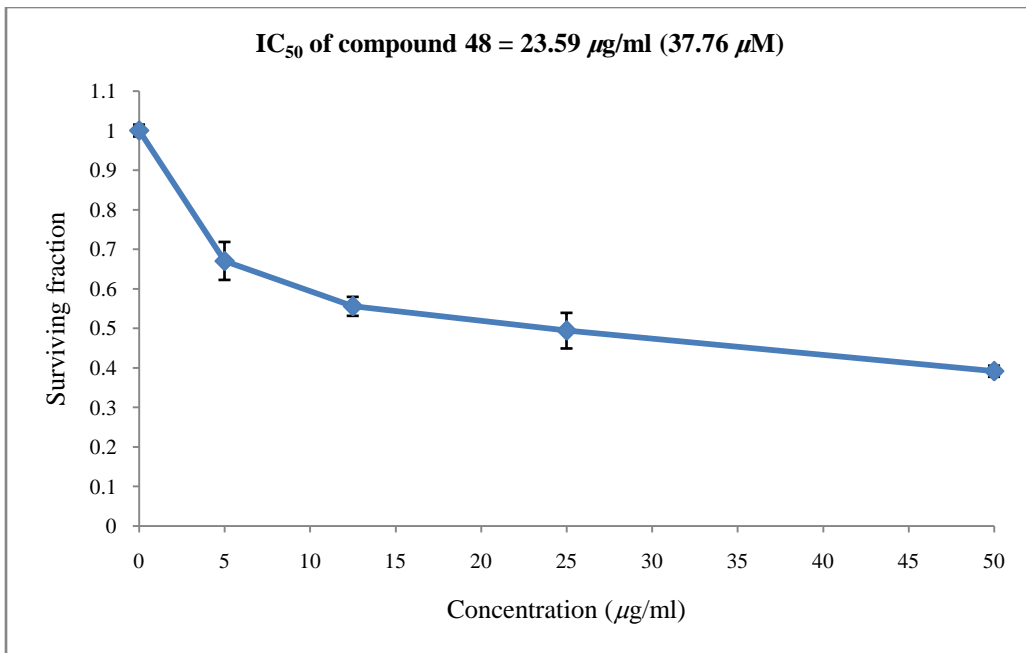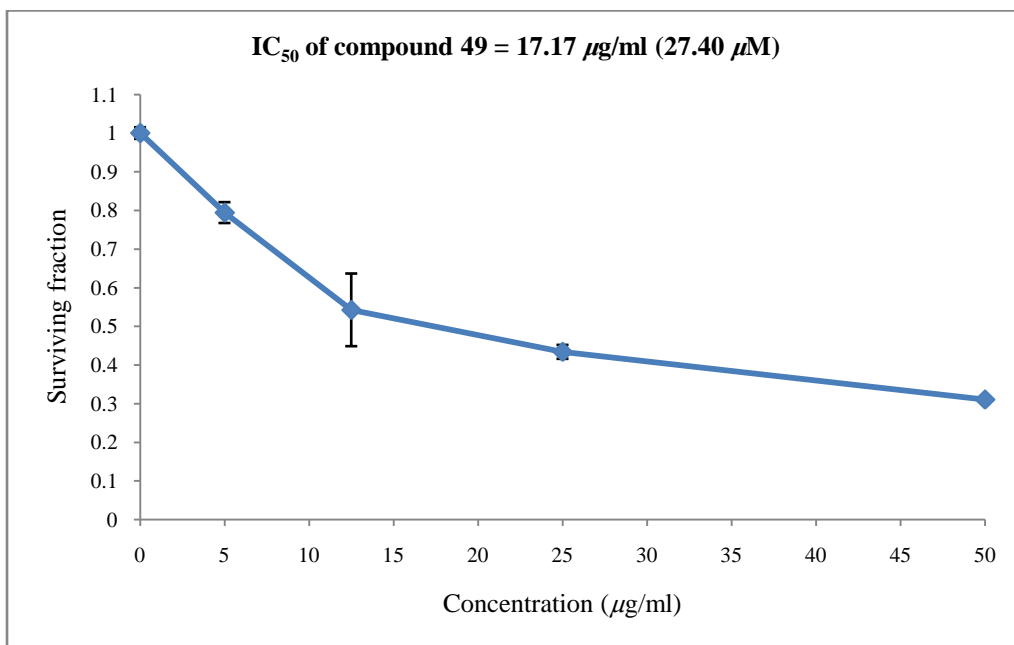

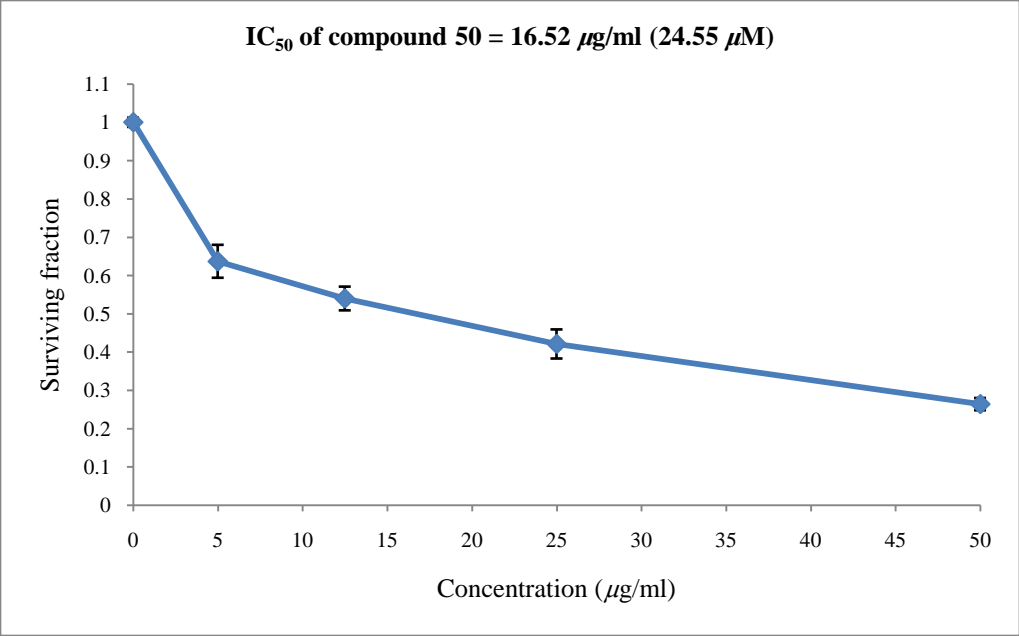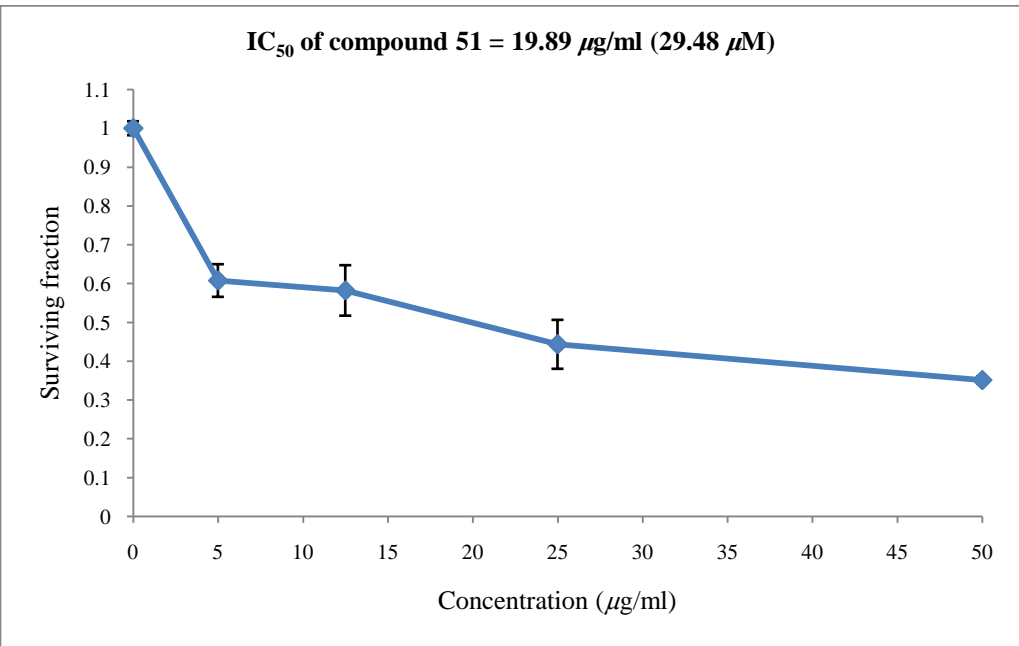

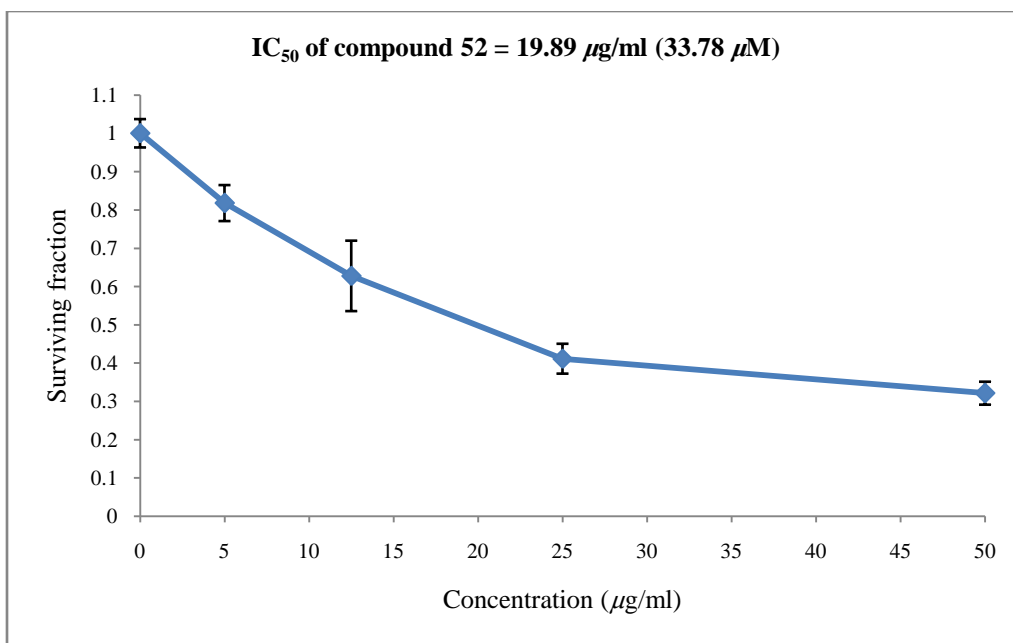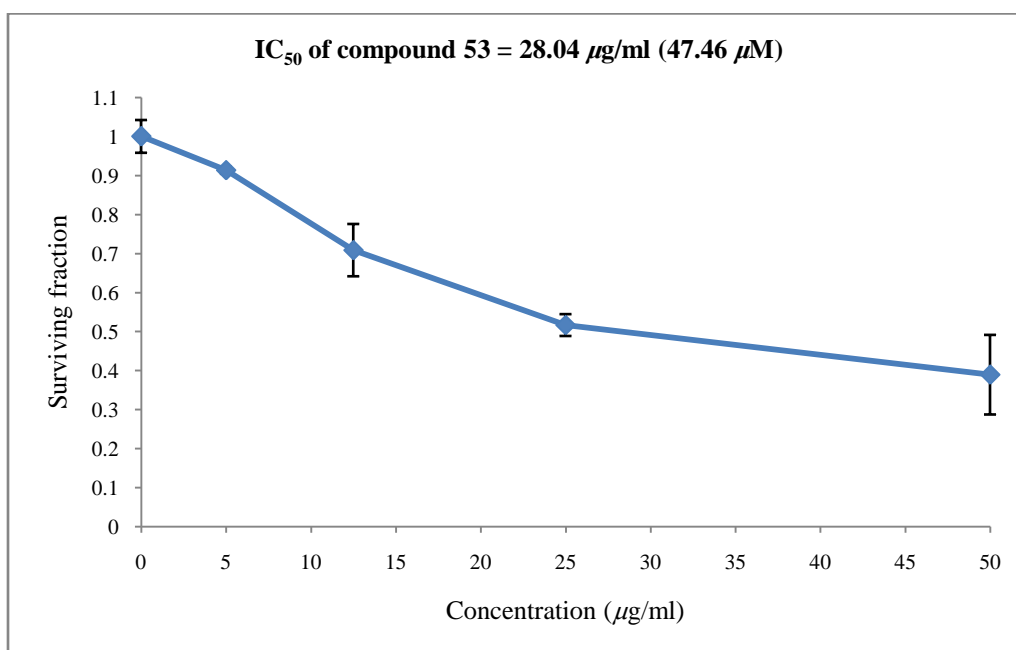

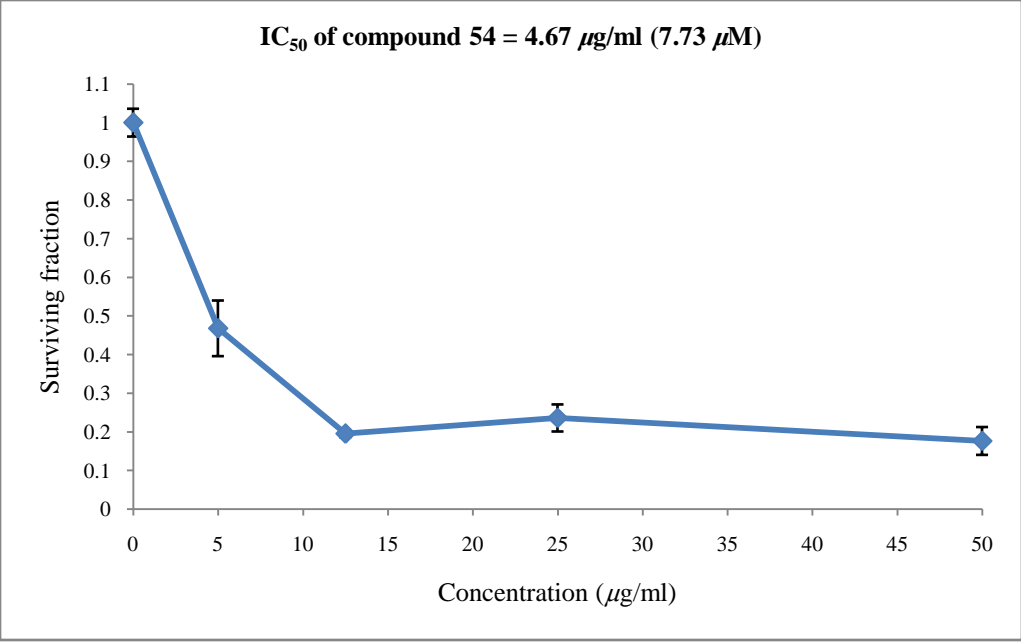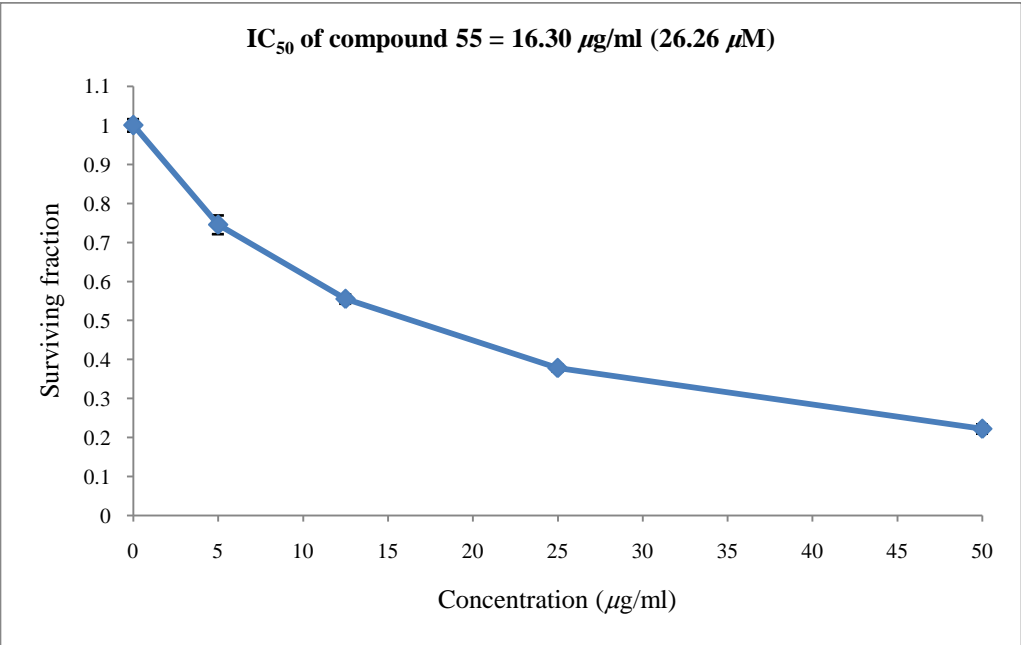



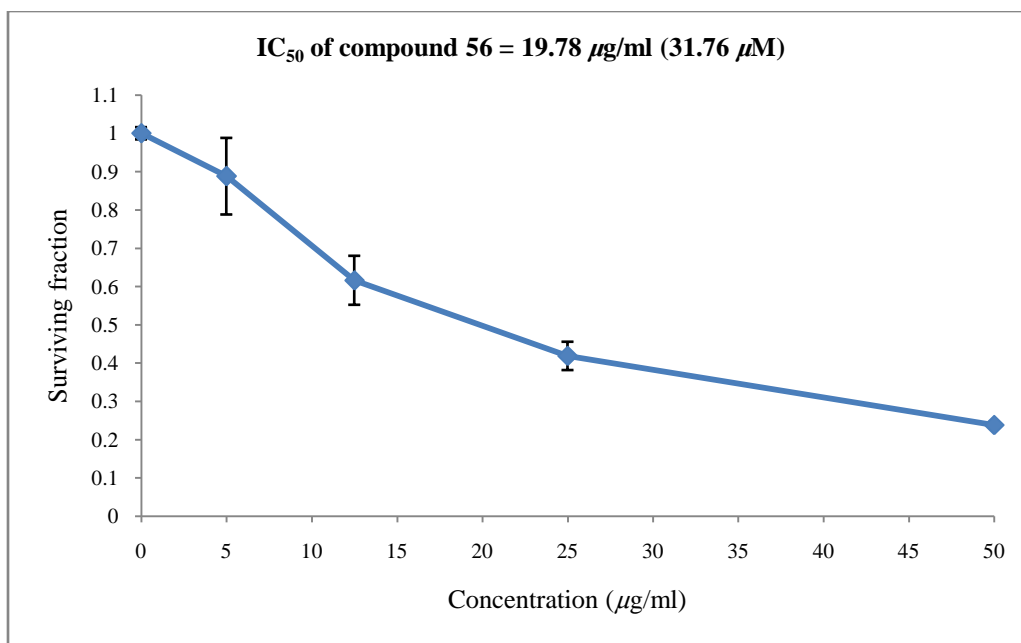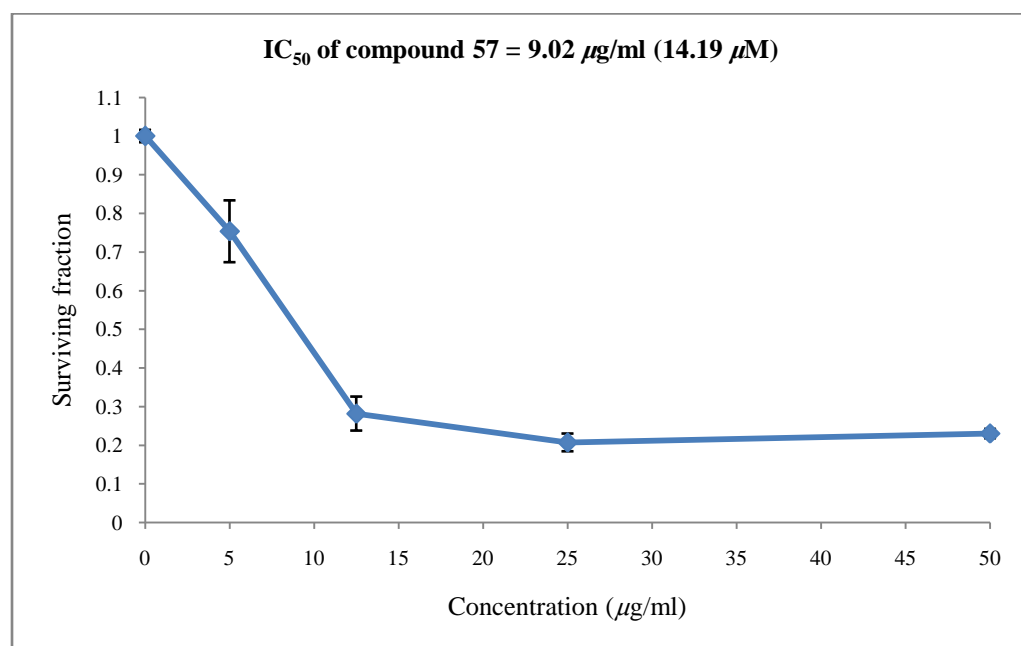

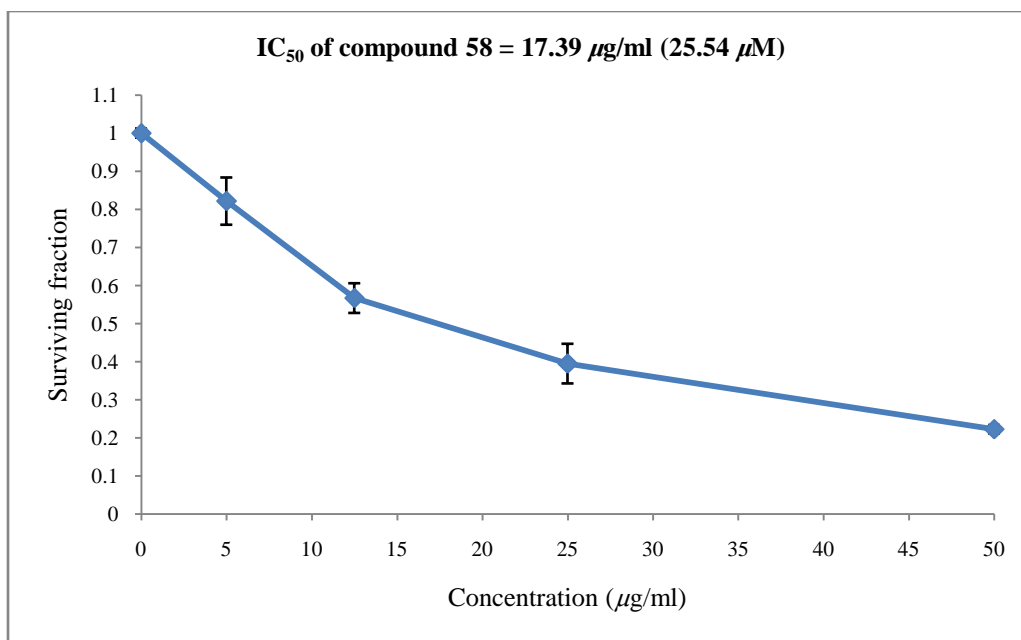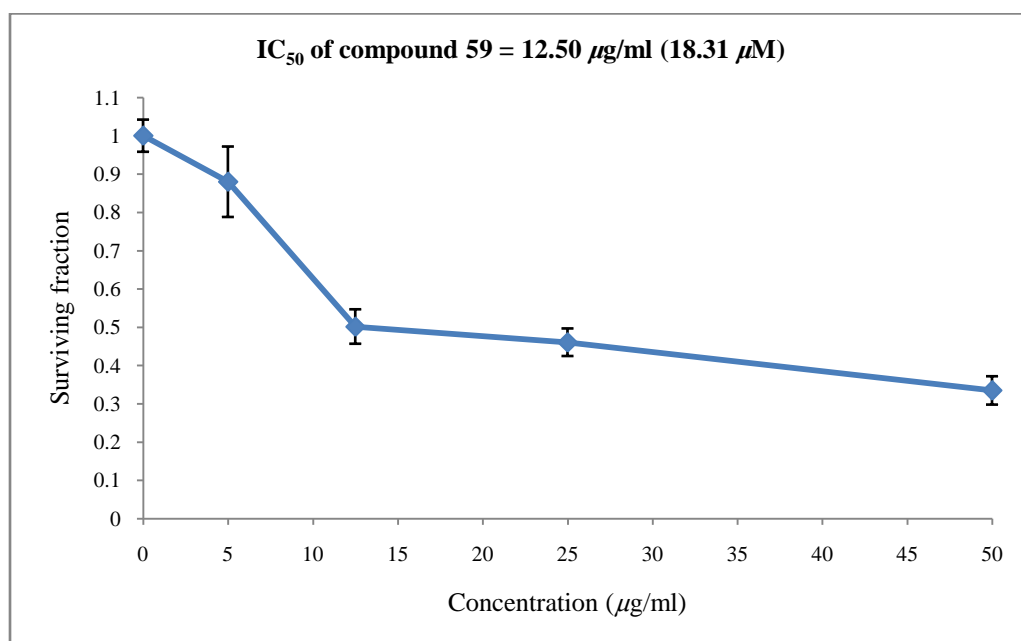

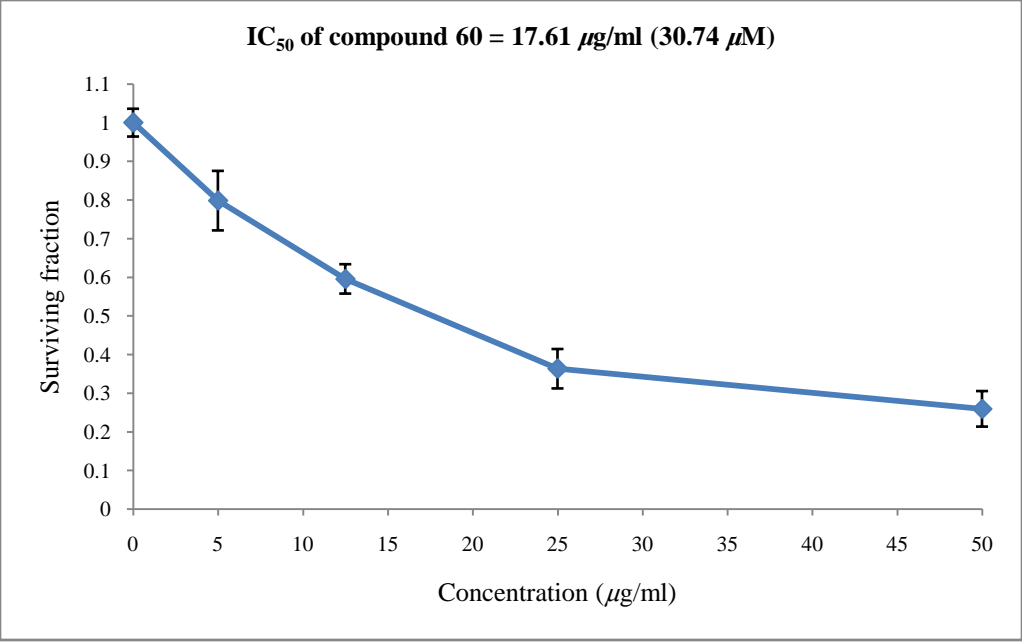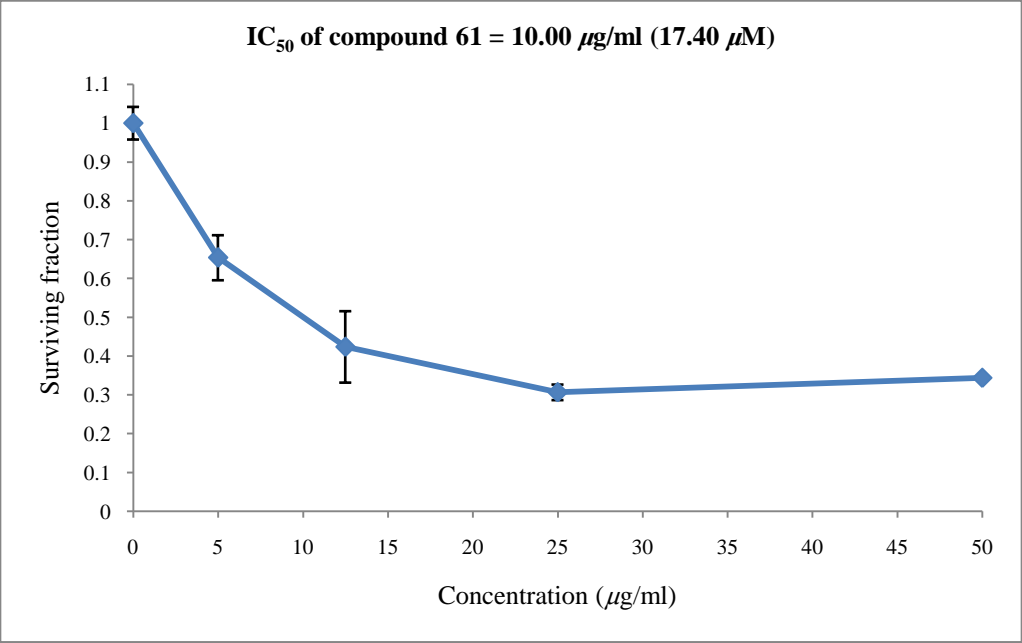

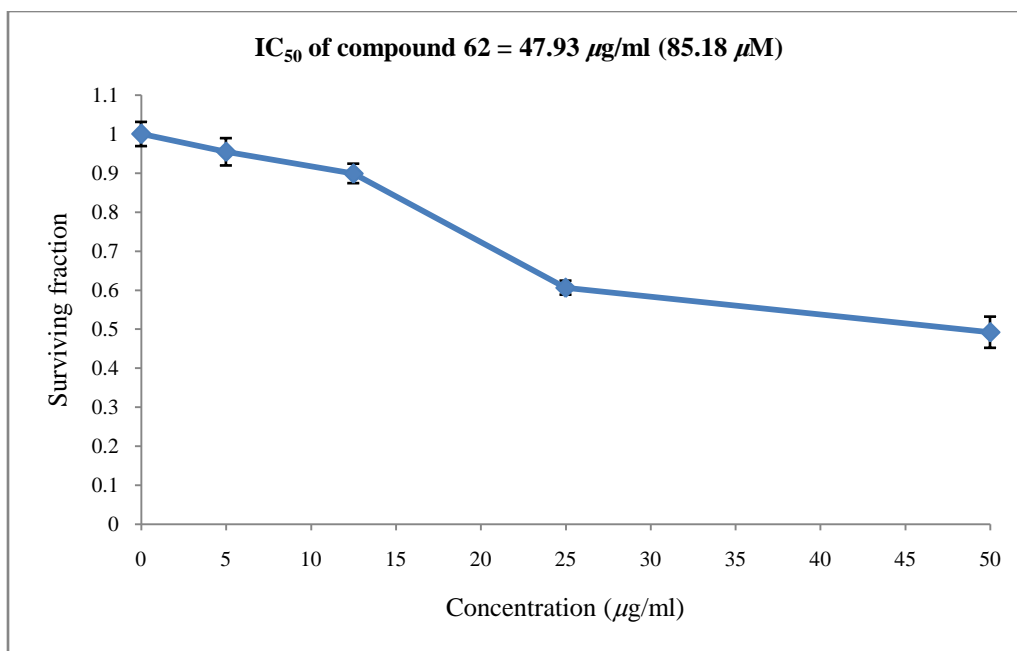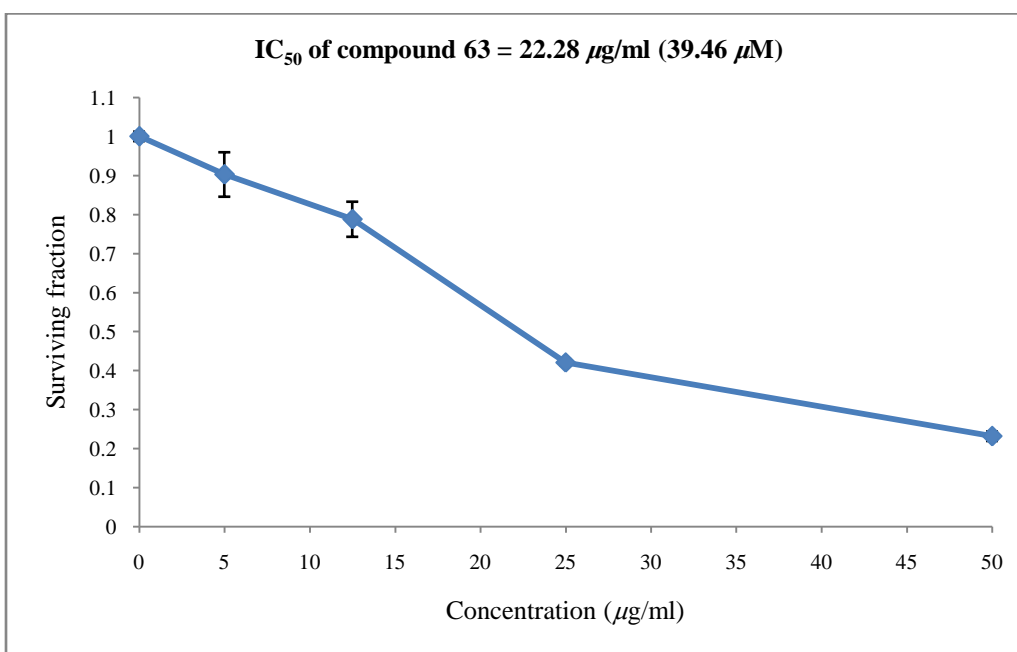

**Figure 115.** Dose-response curve for the synthesized compounds **30-63** against HepG2 (liver cancer) cell line.

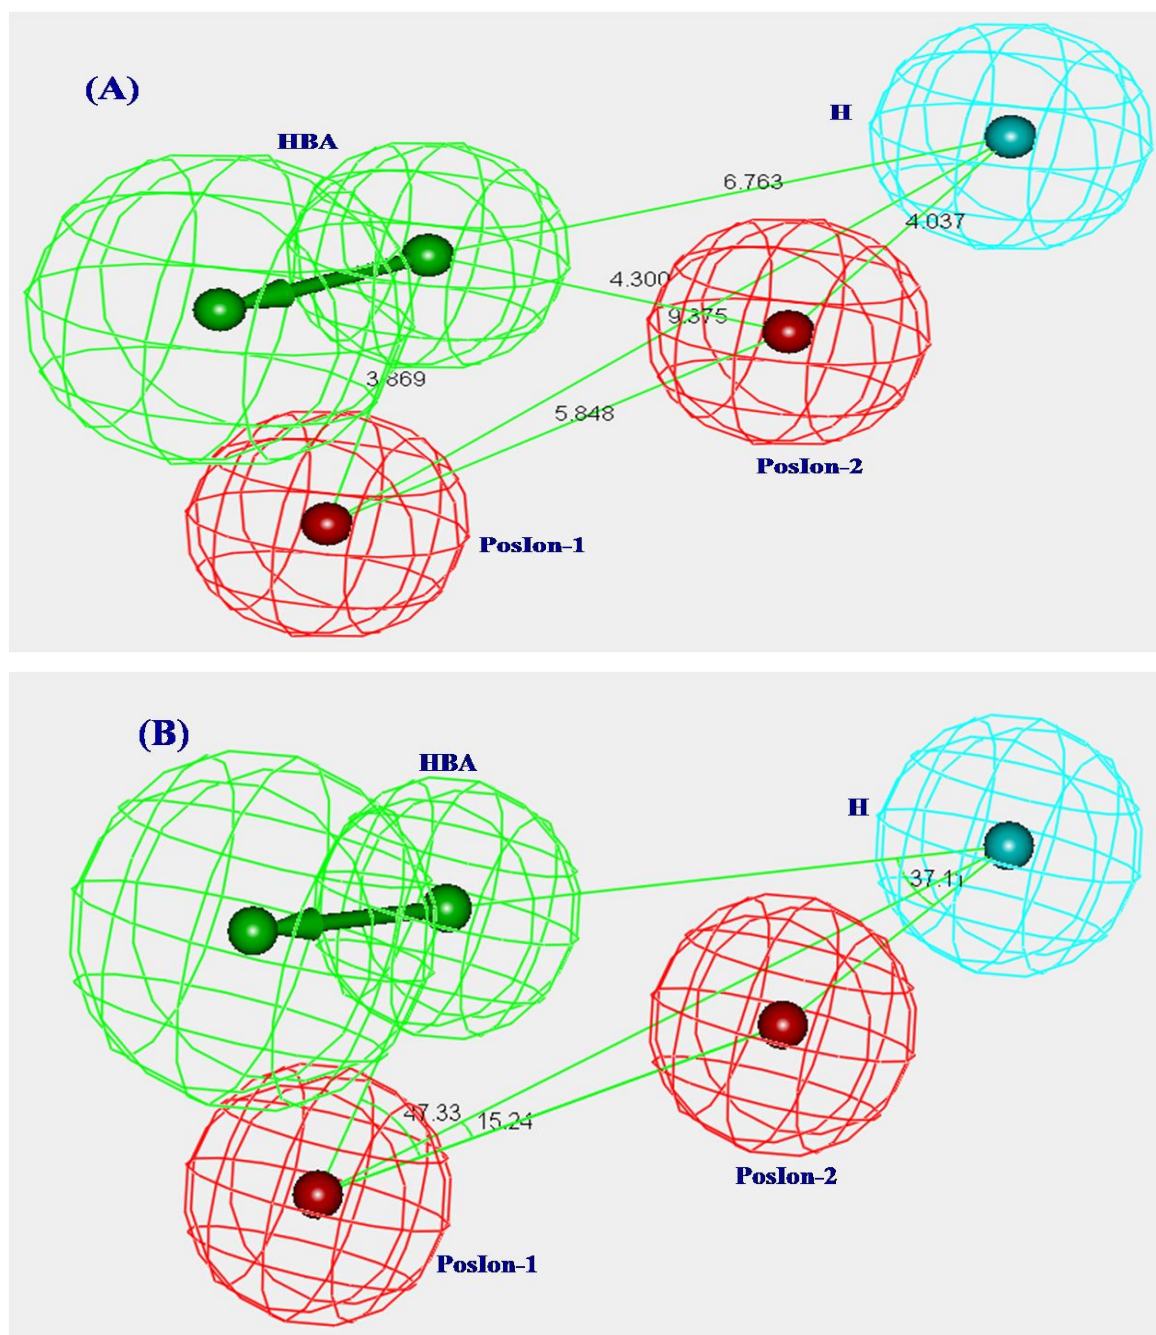

**Figure S116.** (A) Constraint distances “H – PosIon-1 = 9.375, H – PosIon-2 = 4.037, H – HBA = 6.763, PosIon-1 – PosIon-2 = 5.848, PosIon-1 – HBA = 3.869, PosIon-2 – HBA = 4.300 Å” and (B) constraint angles “H – PosIon-1 – PosIon-2 = 15.24, H – PosIon-1 – HBA = 47.33, PosIon-2 – H – PosIon-1 = 37.11 °” of the generated 3D-pharmacophore for the synthesized bio-active spiro-compounds **30-63** against HeLa (cervical carcinoma) cell line which contains two positive ionizables (PosIon-1, PosIon-2; red), one hydrophobic (H; light blue) and one hydrogen bonding acceptor (HBA; green).

**Compound 30**

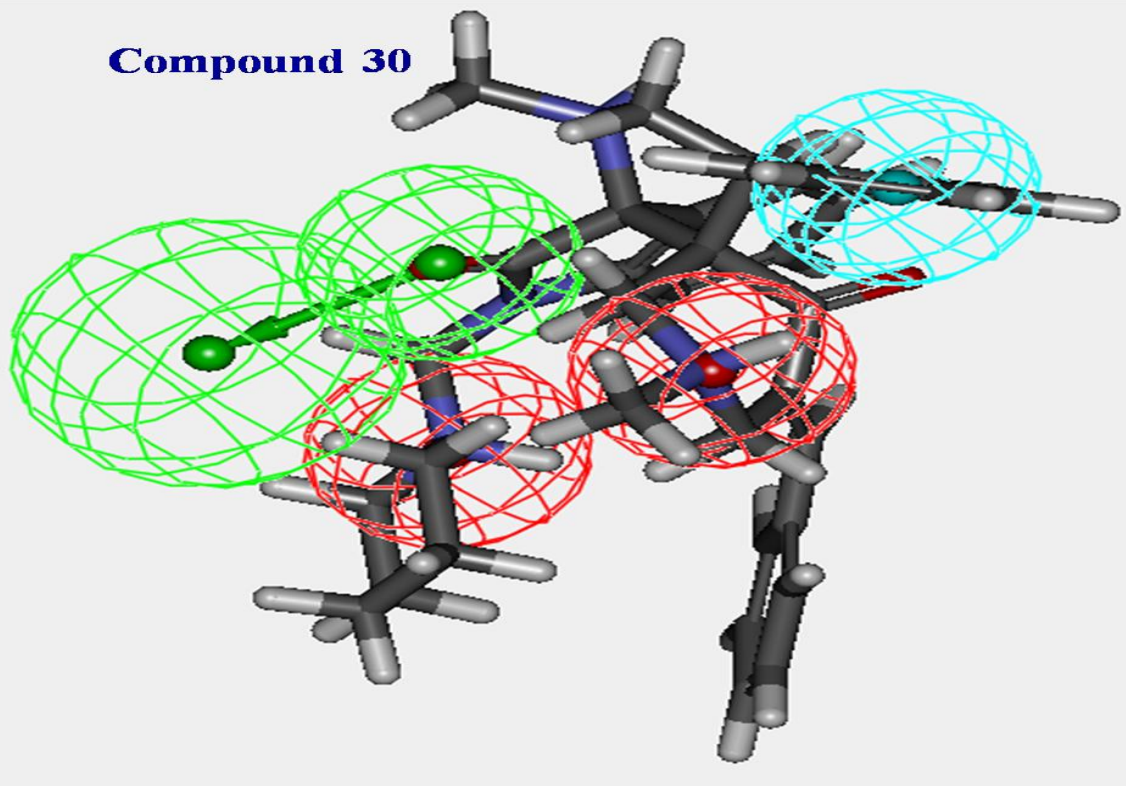

**Compound 31**

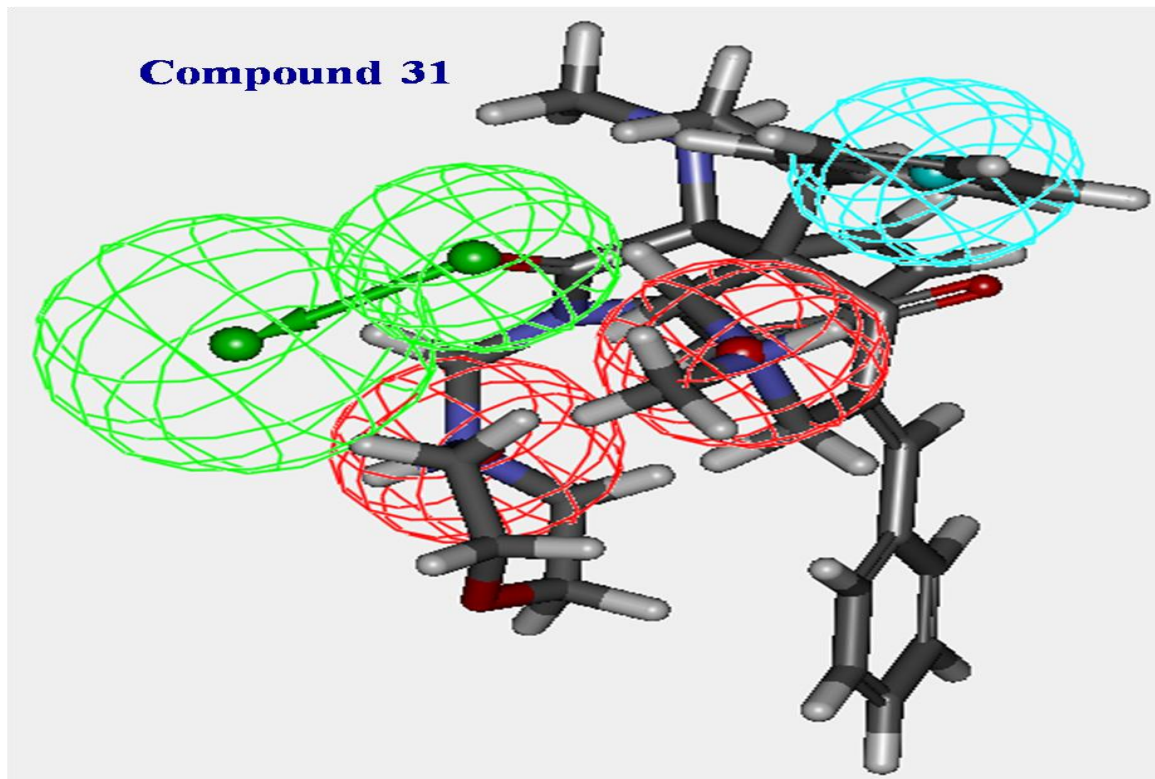

**Compound 32**

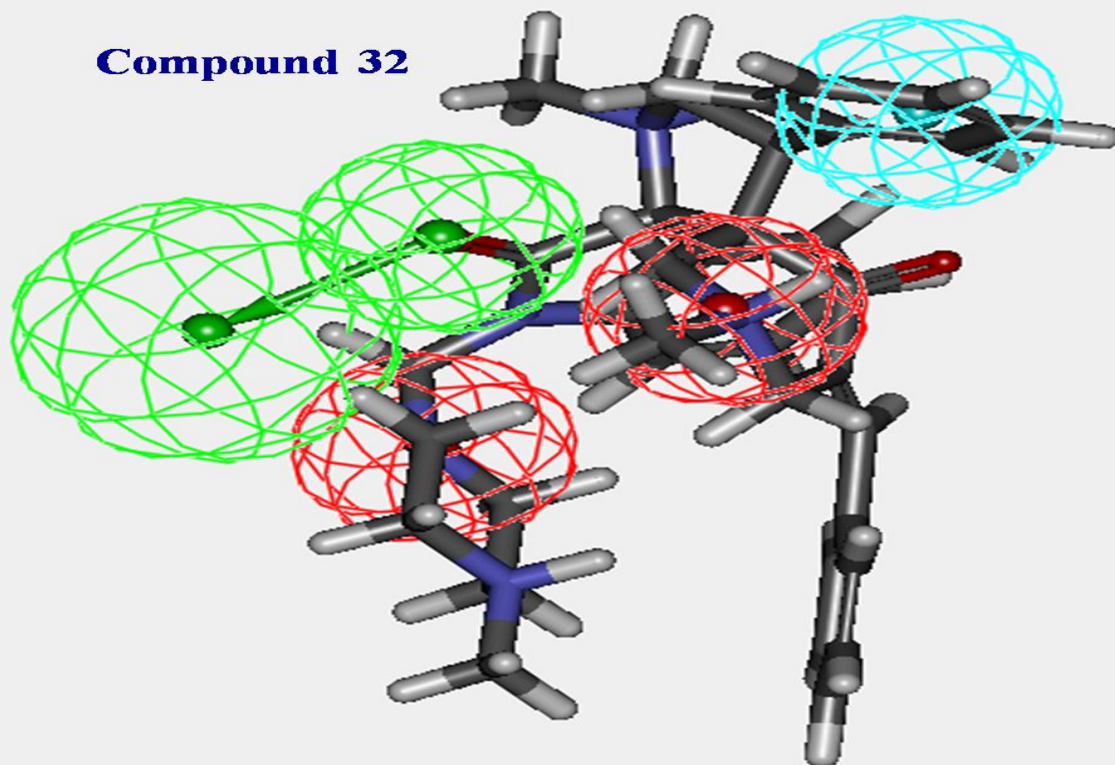

**Compound 33**

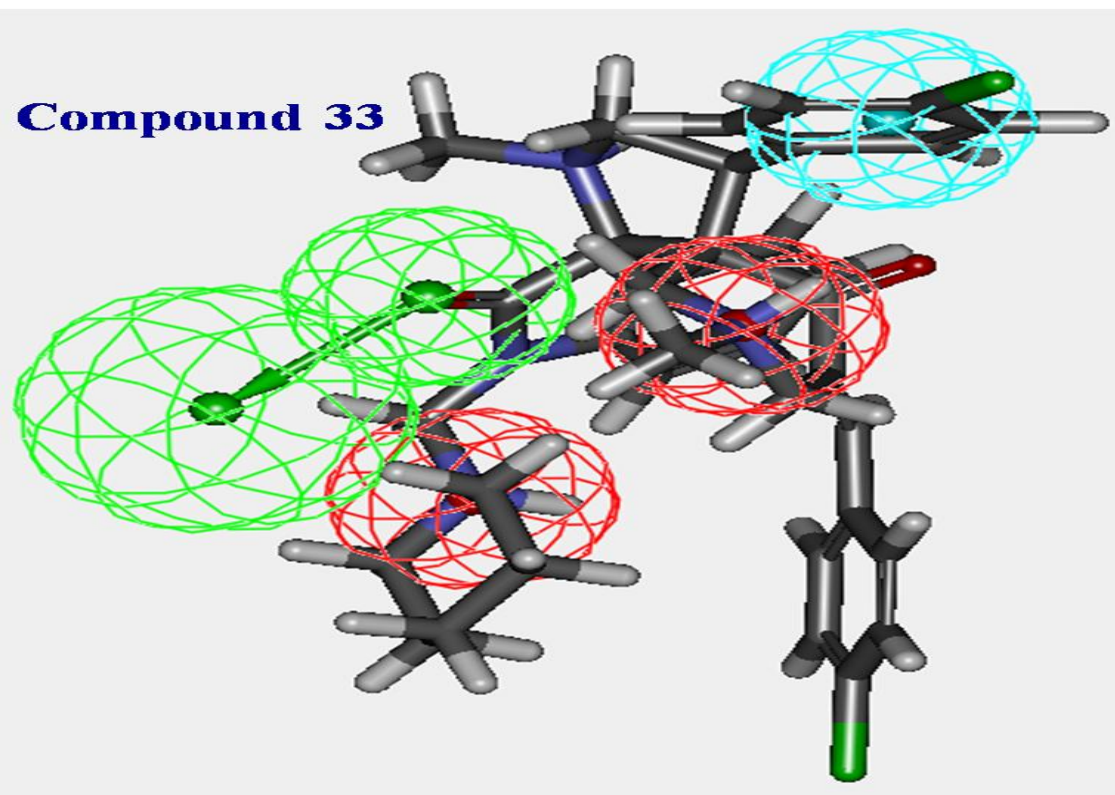

**Compound 34**

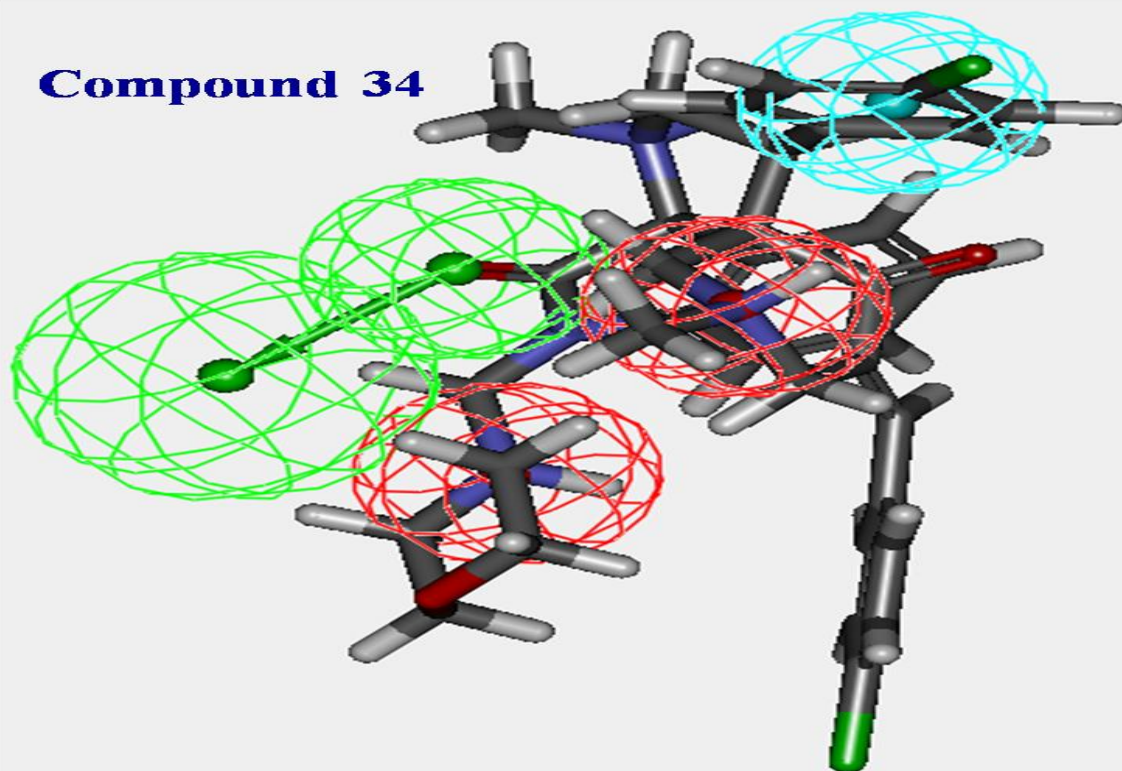

**Compound 35**

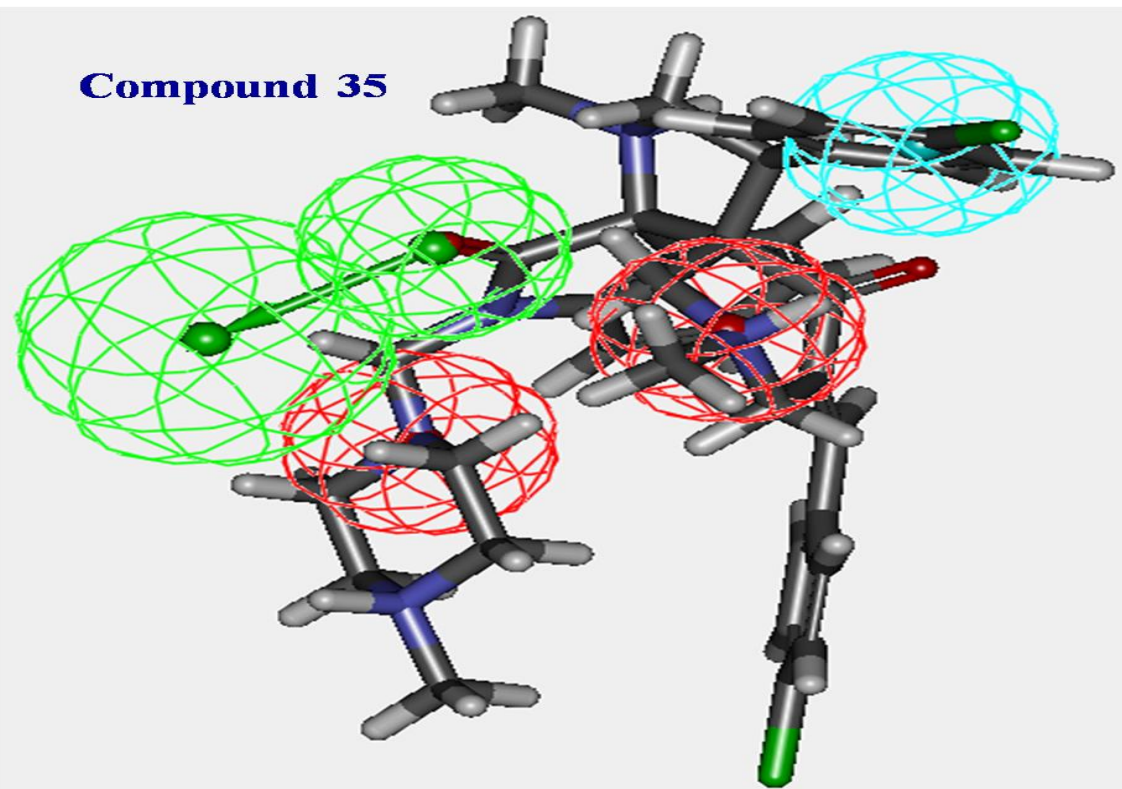



**Compound 36**

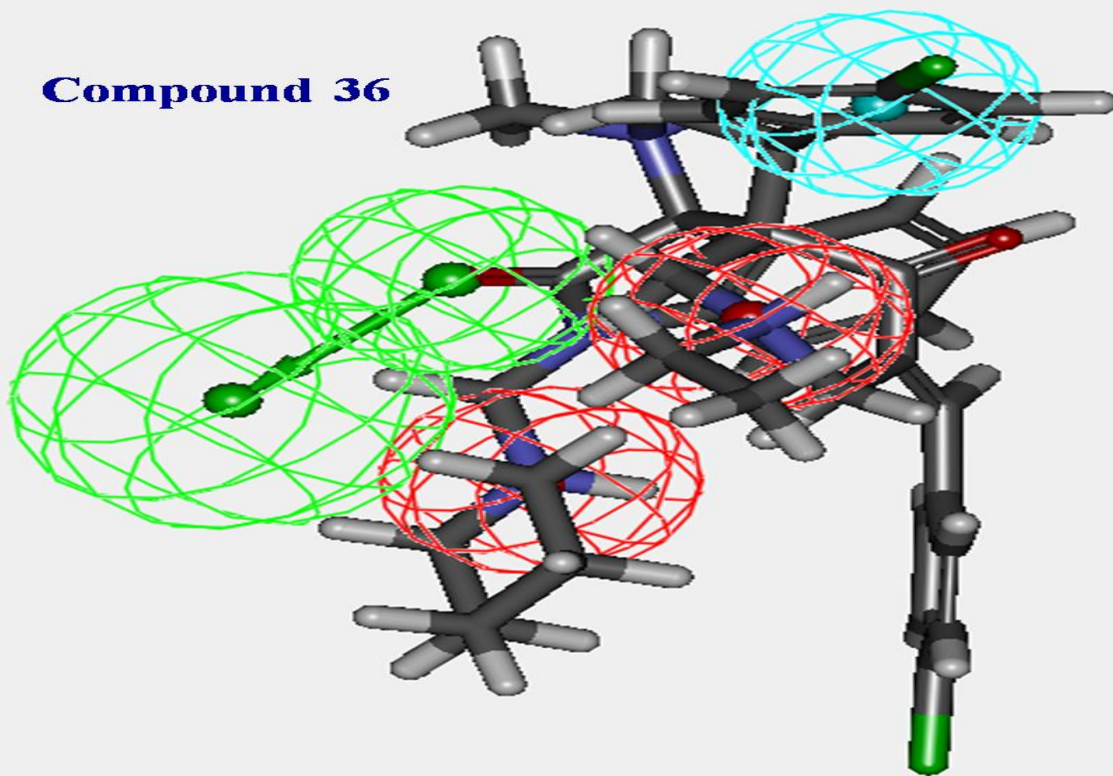

**Compound 37**

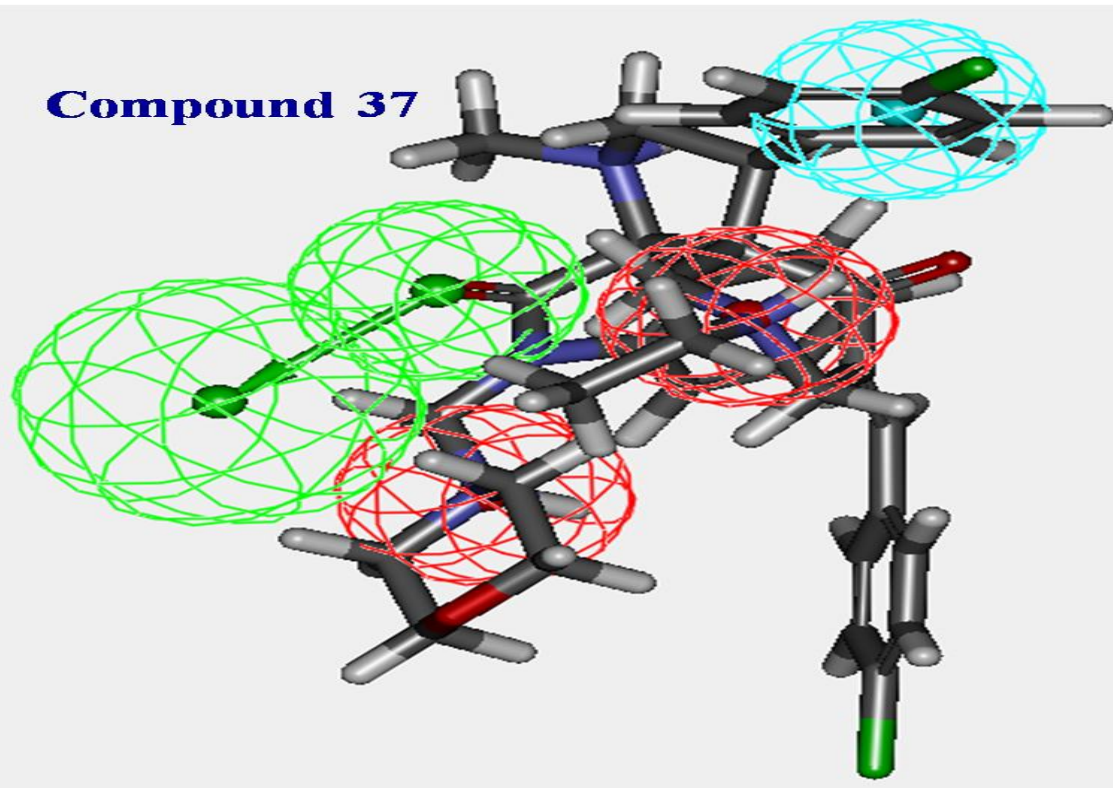

**Compound 38**

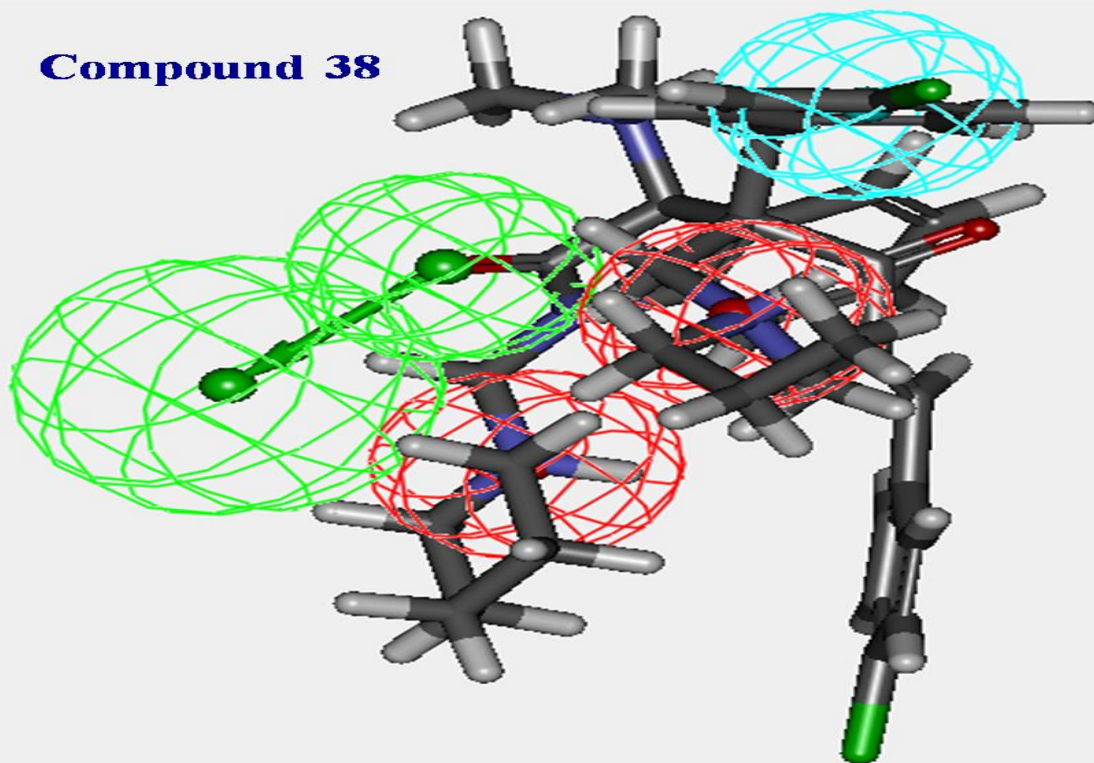

**Compound 39**

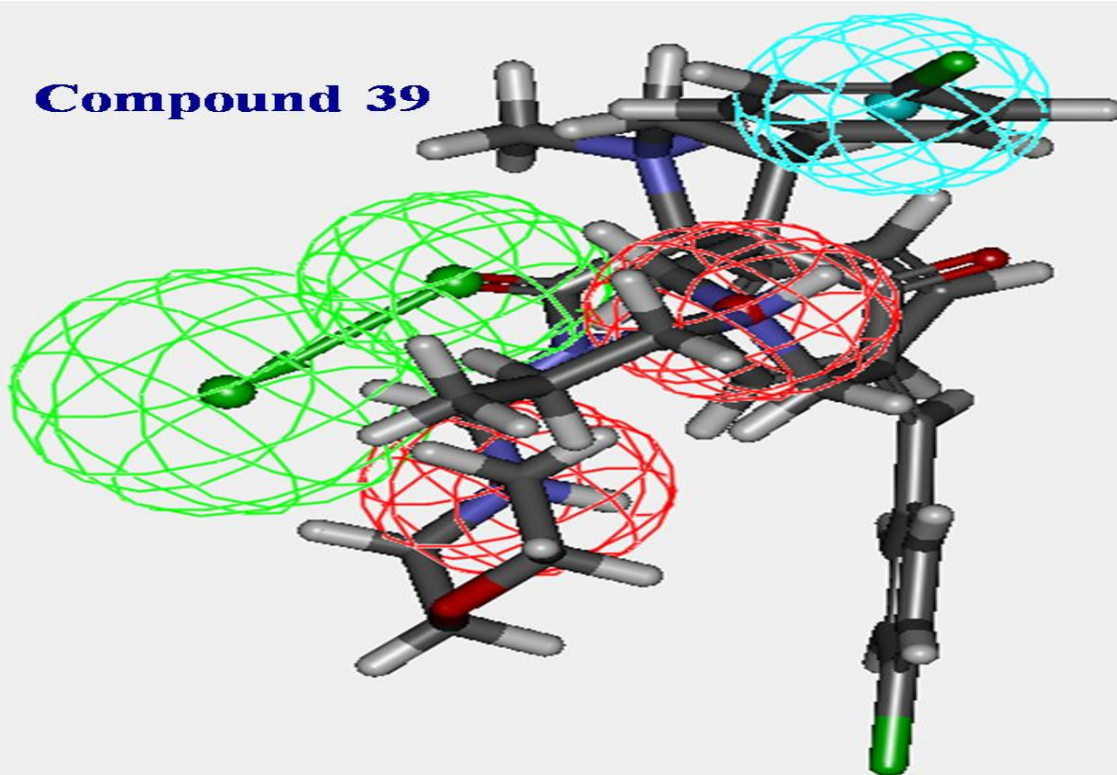

**Compound 40**

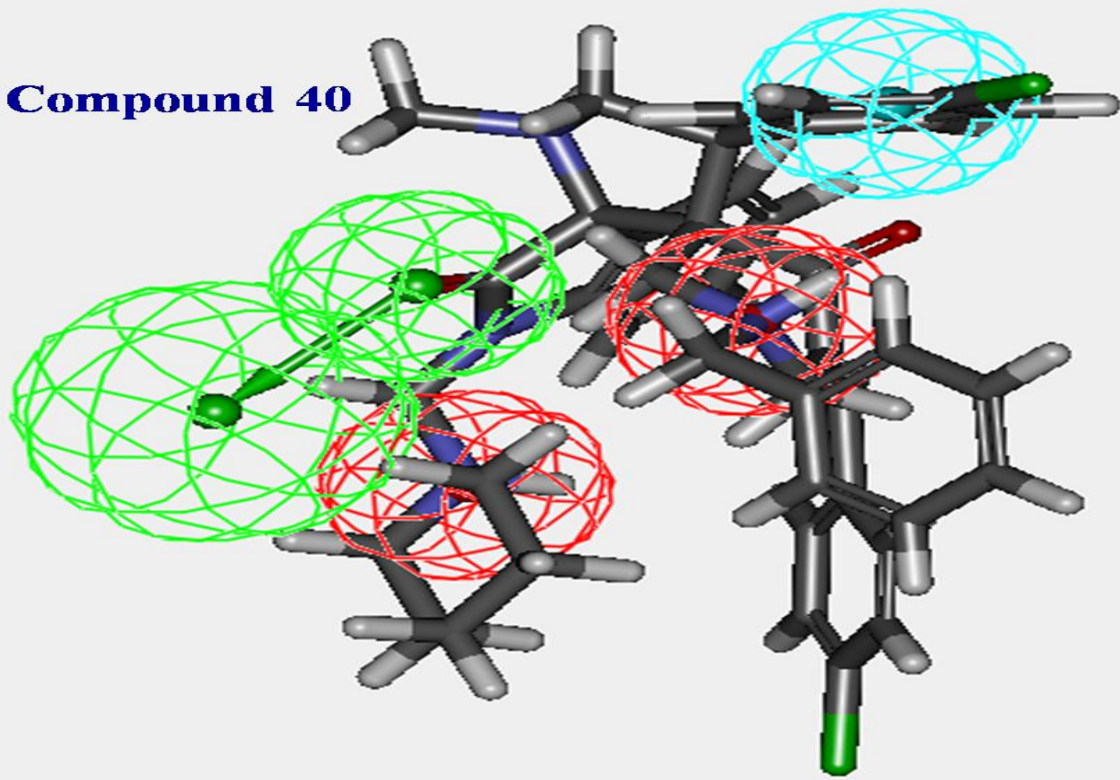

**Compound 41**

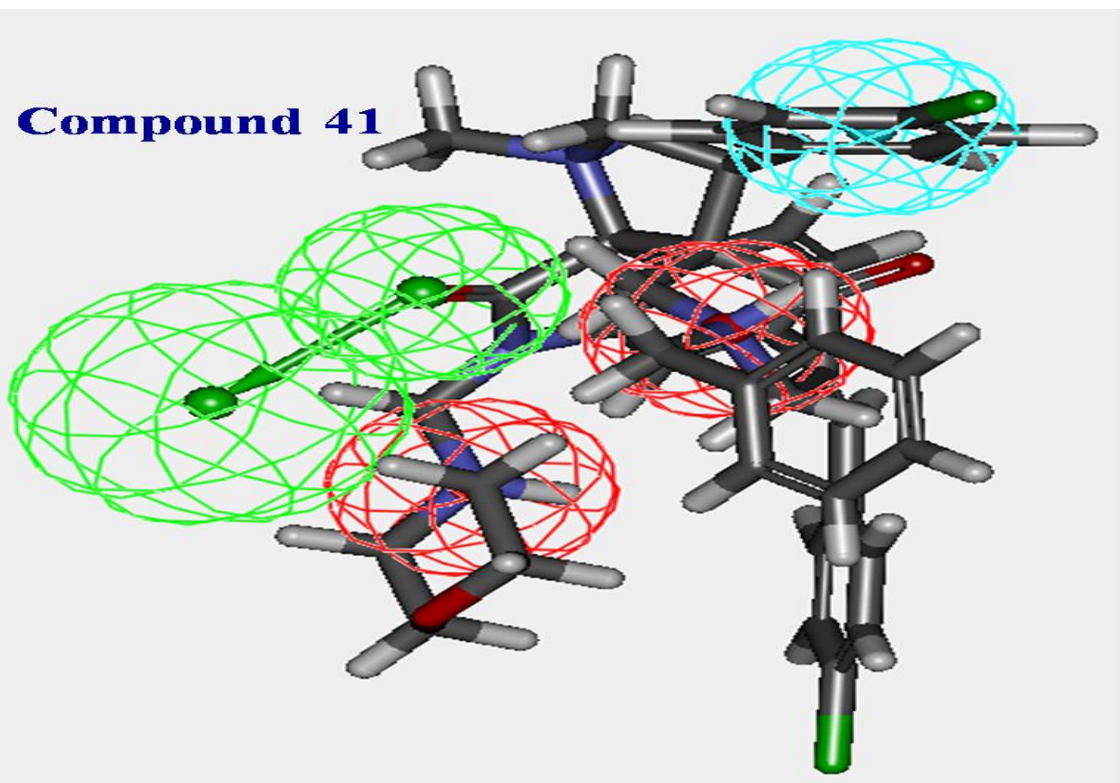

**Compound 42**

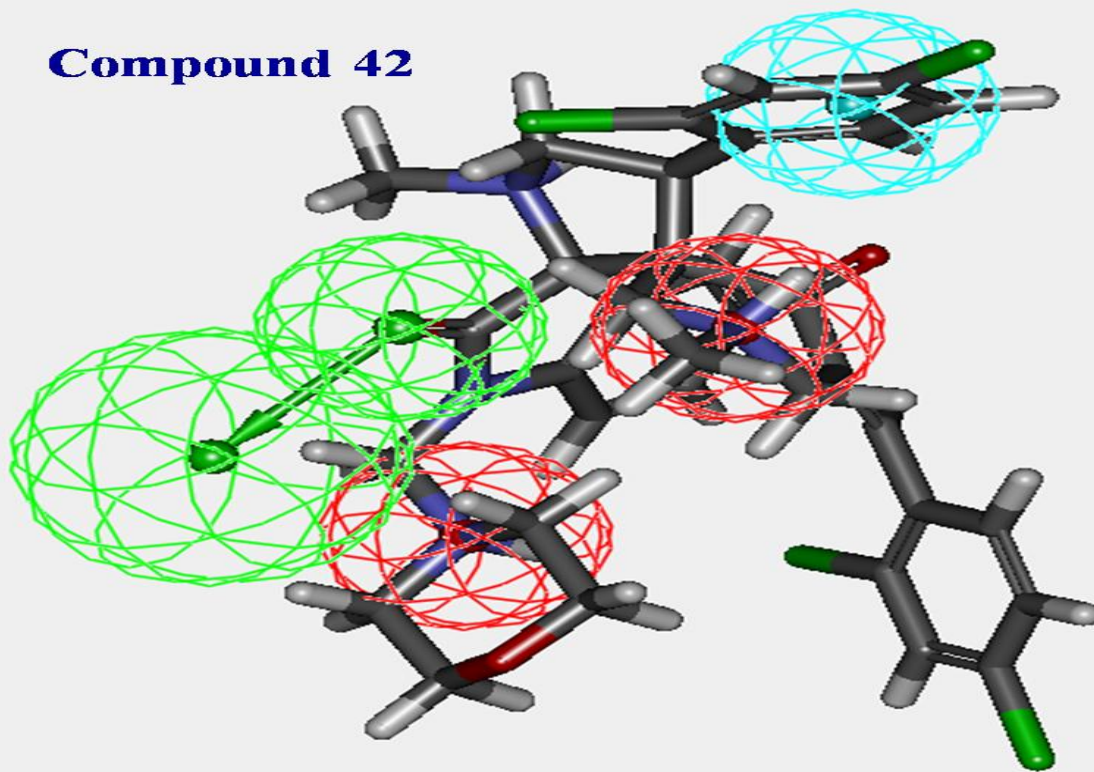

**Compound 43**

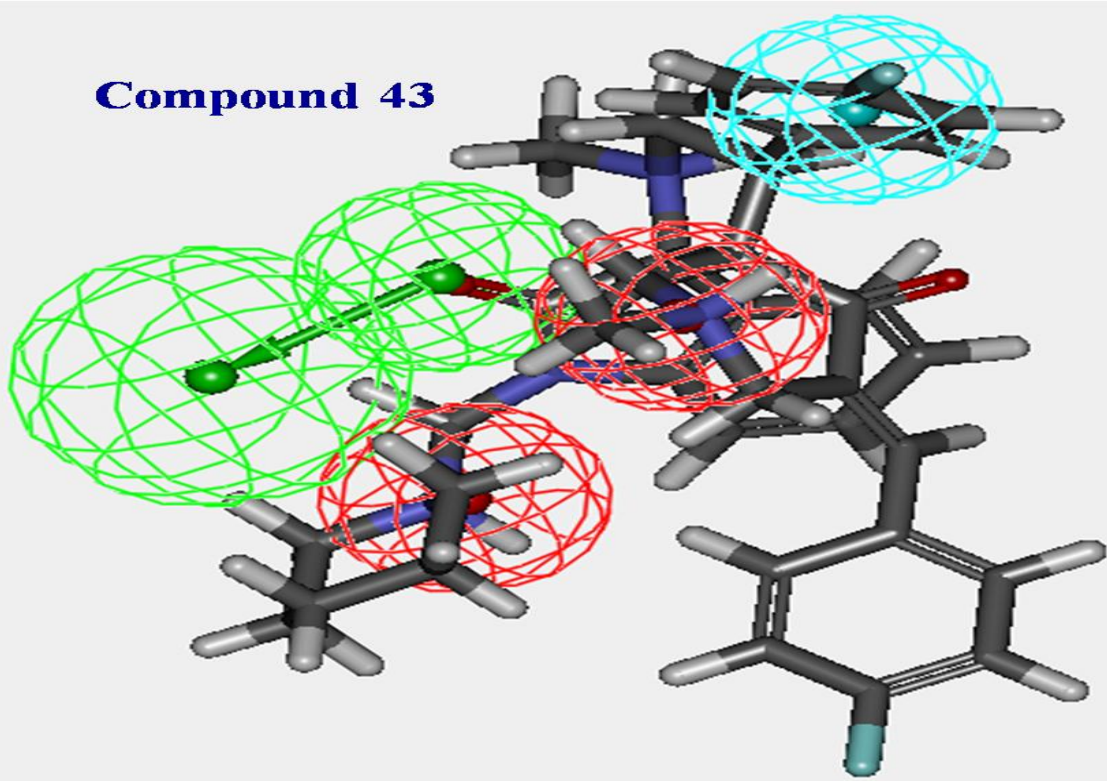

**Compound 44**

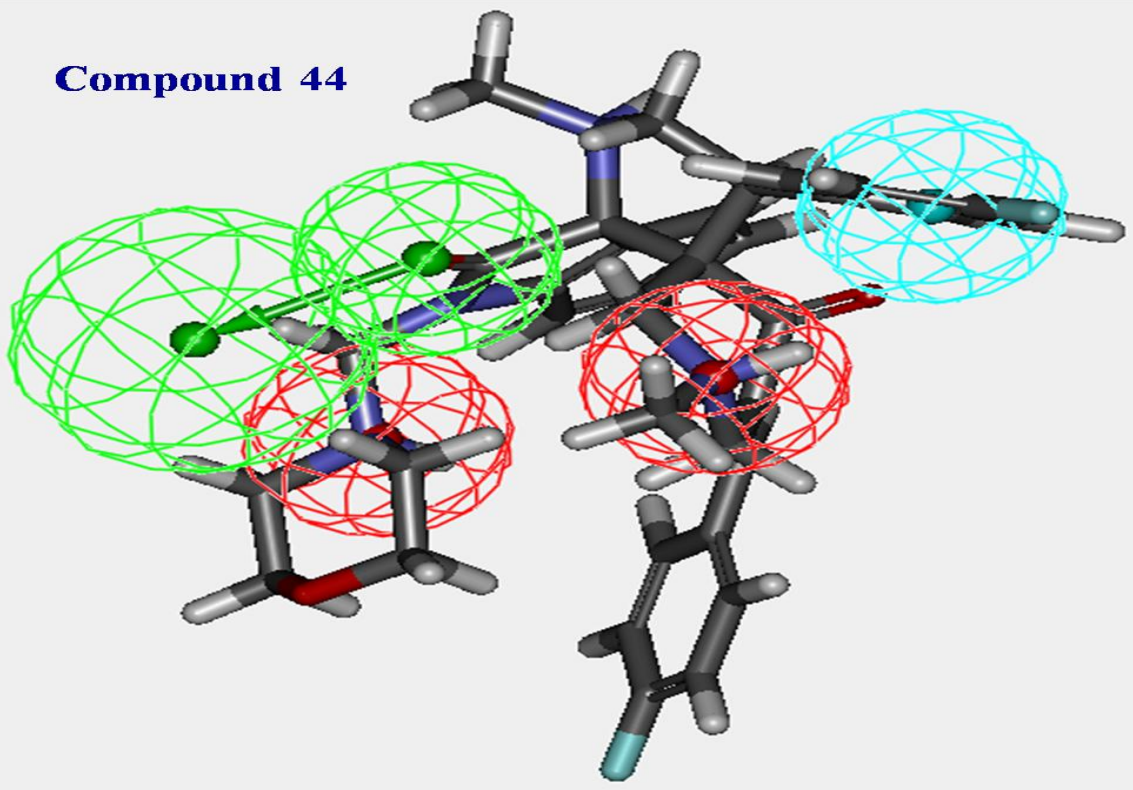

**Compound 45**

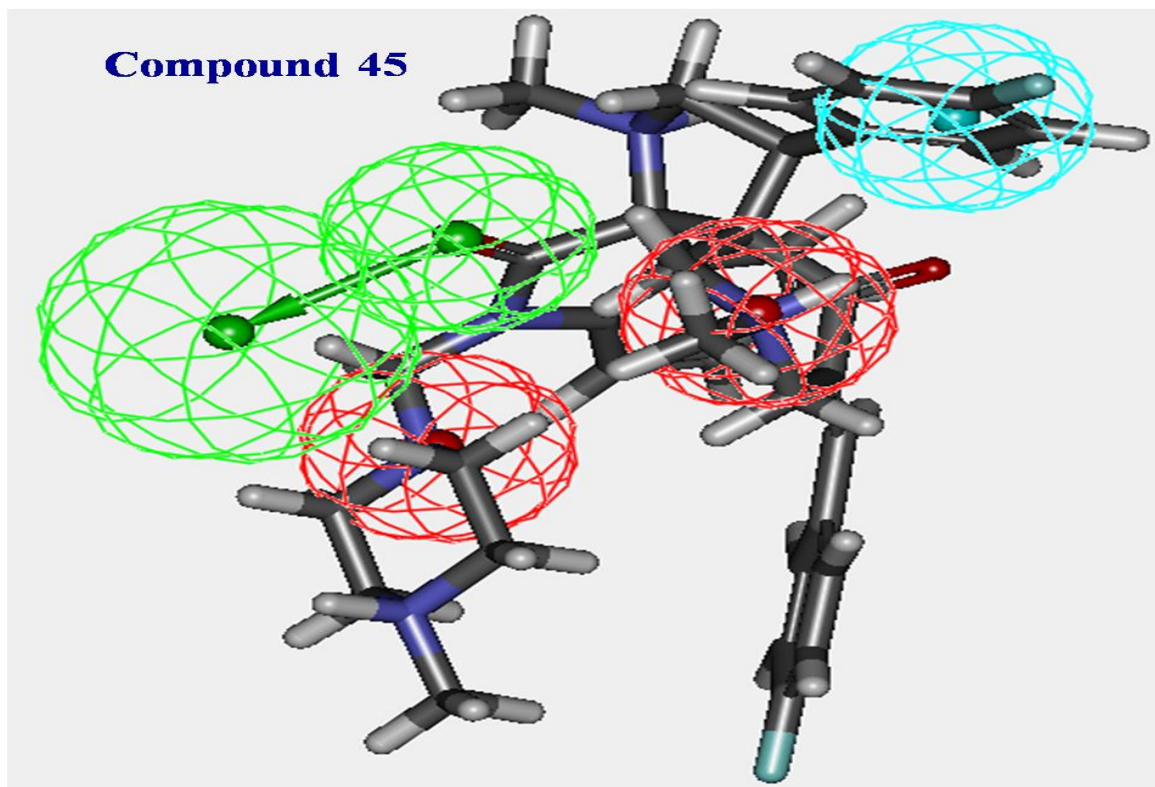

**Compound 46**

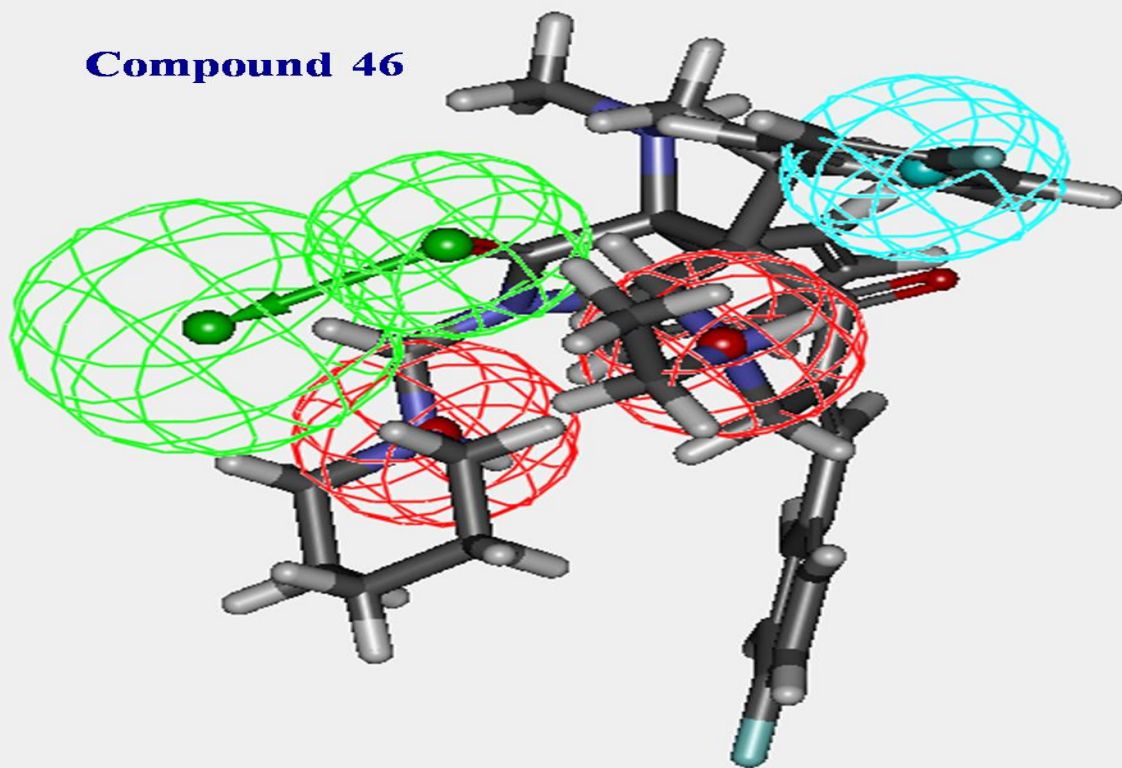

**Compound 47**

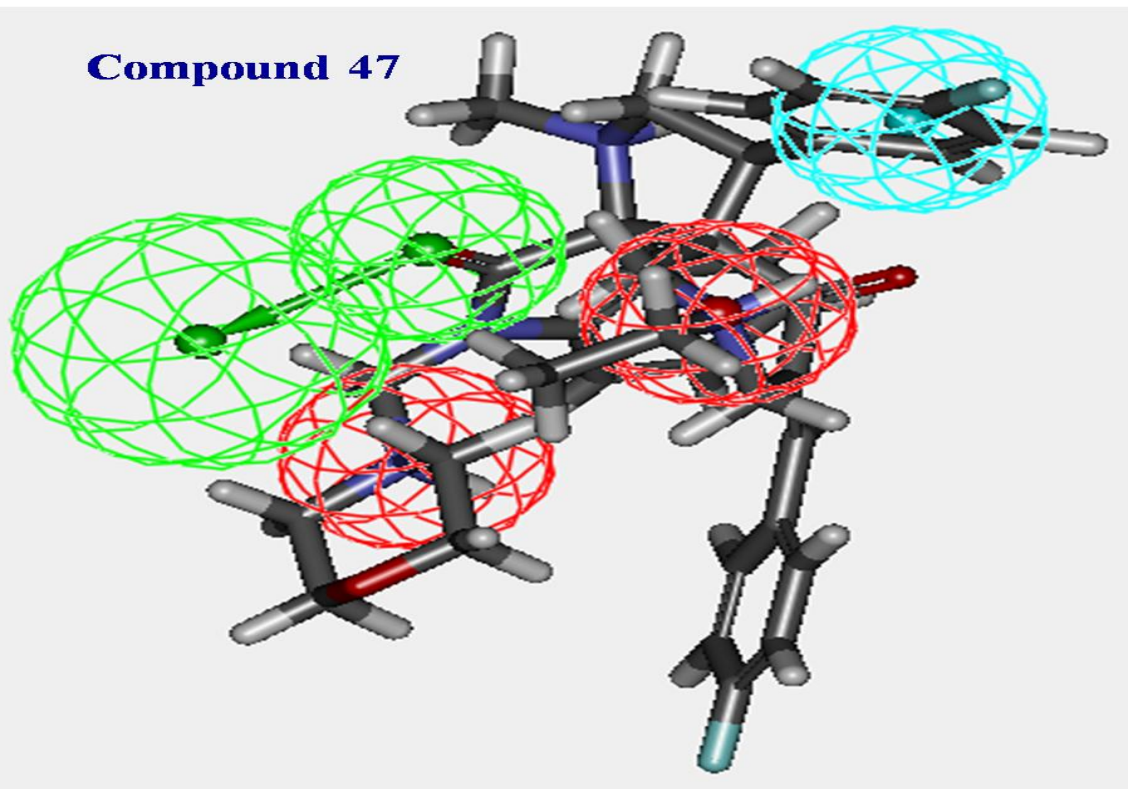

**Compound 48**

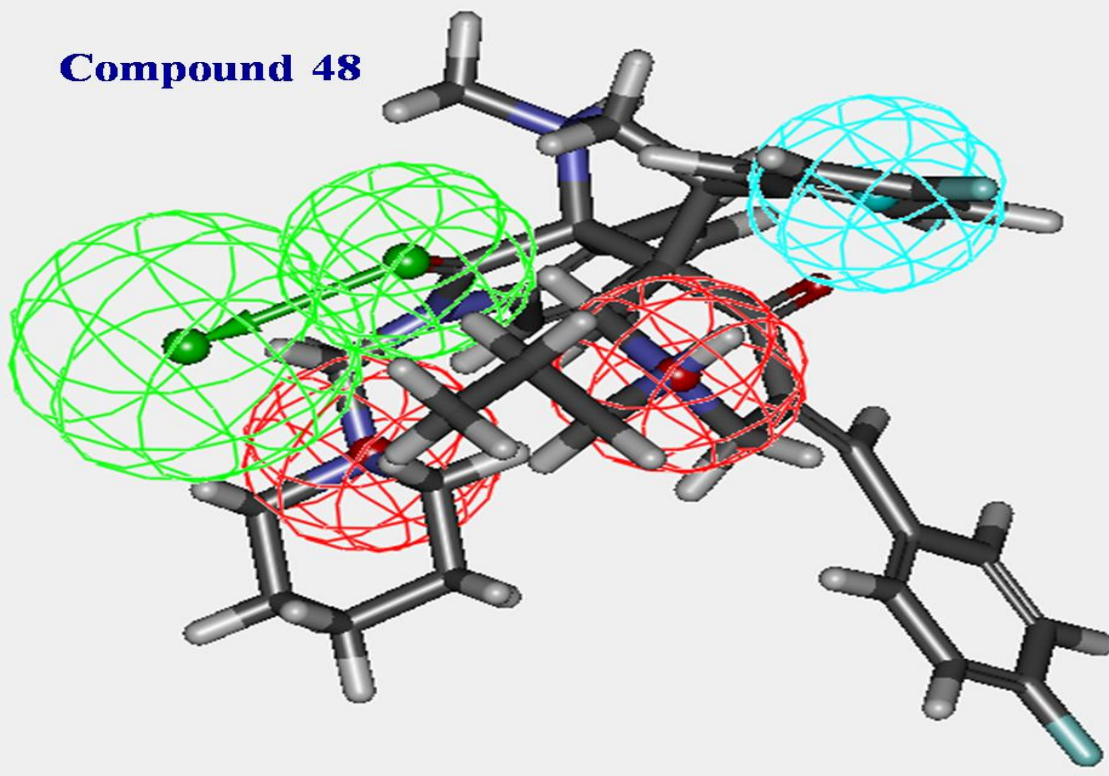

**Compound 49**

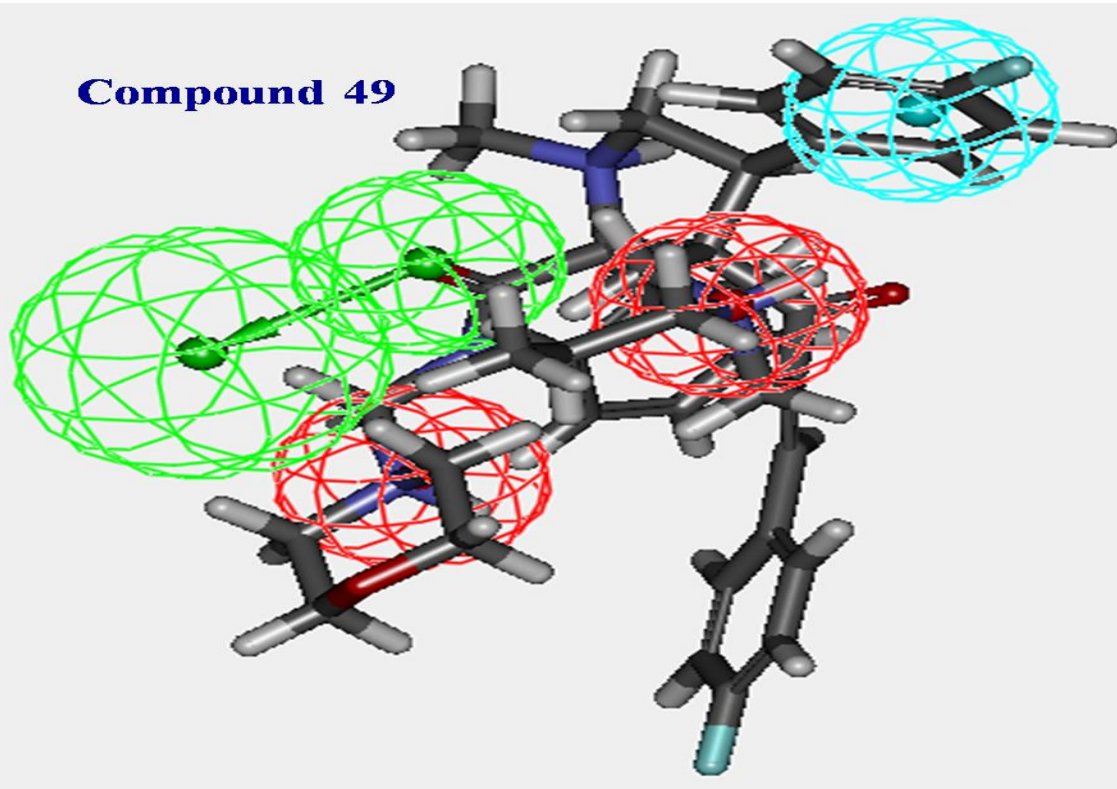

**Compound 50**

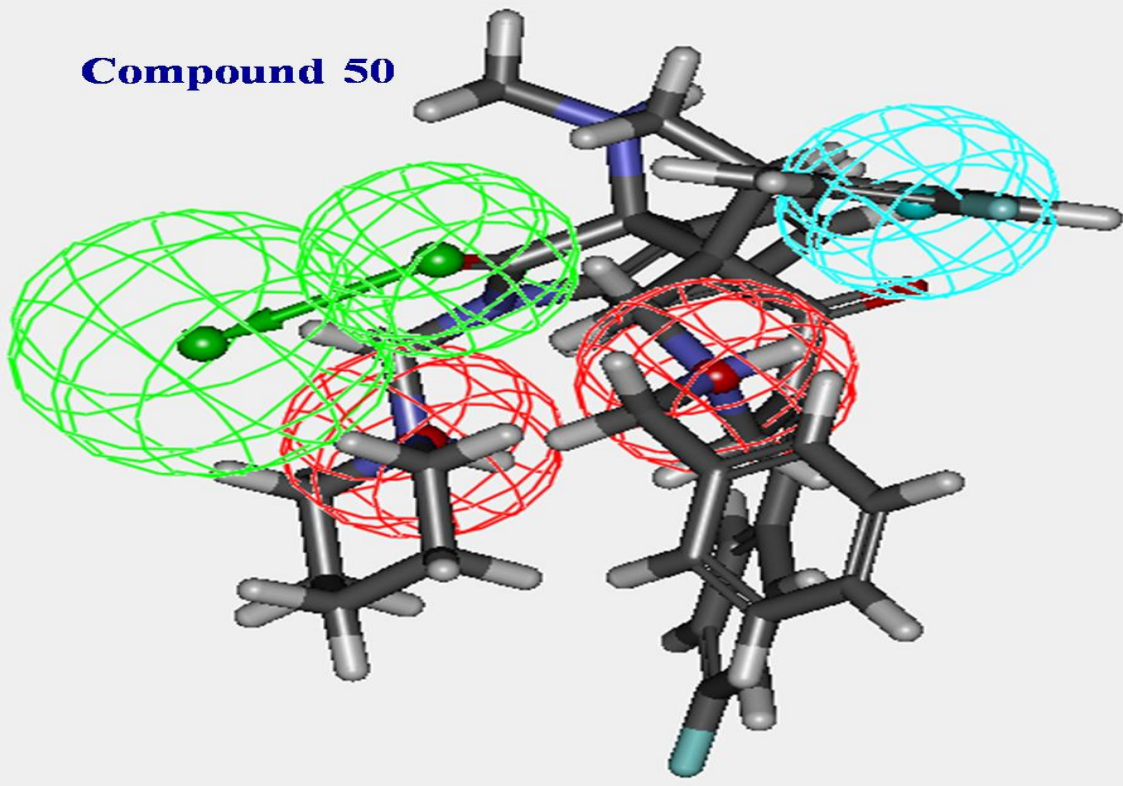

**Compound 51**

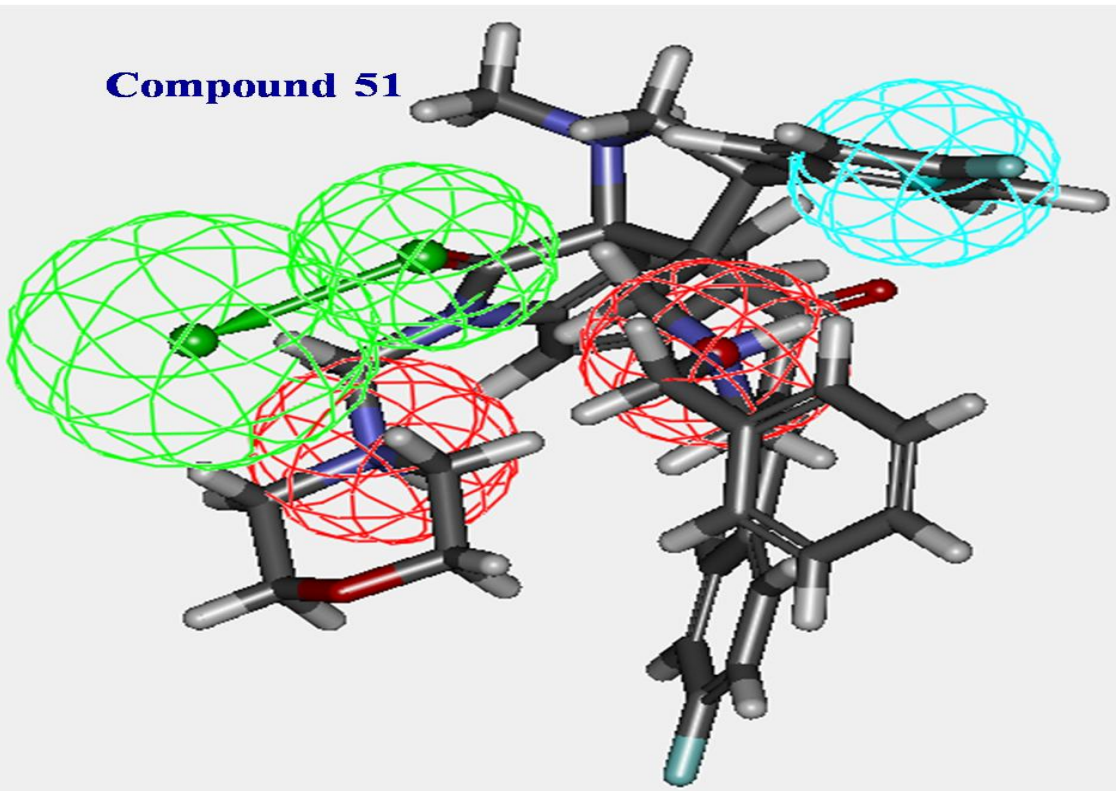



**Compound 52**

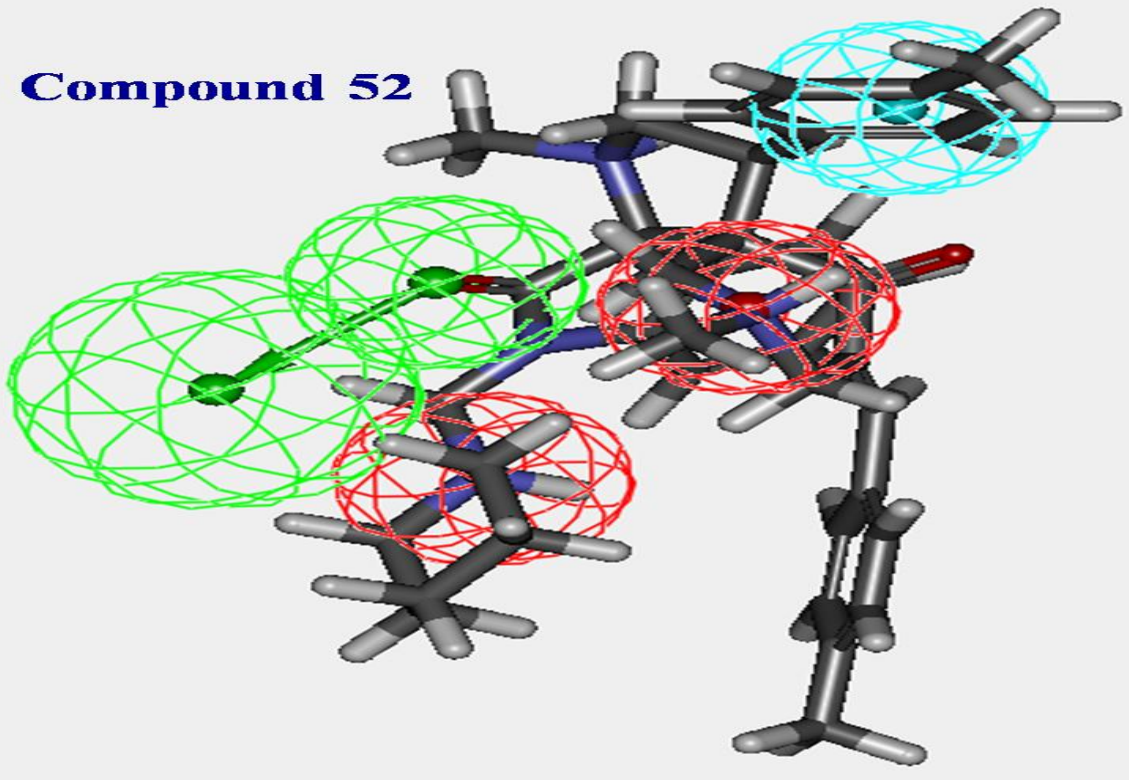

**Compound 53**

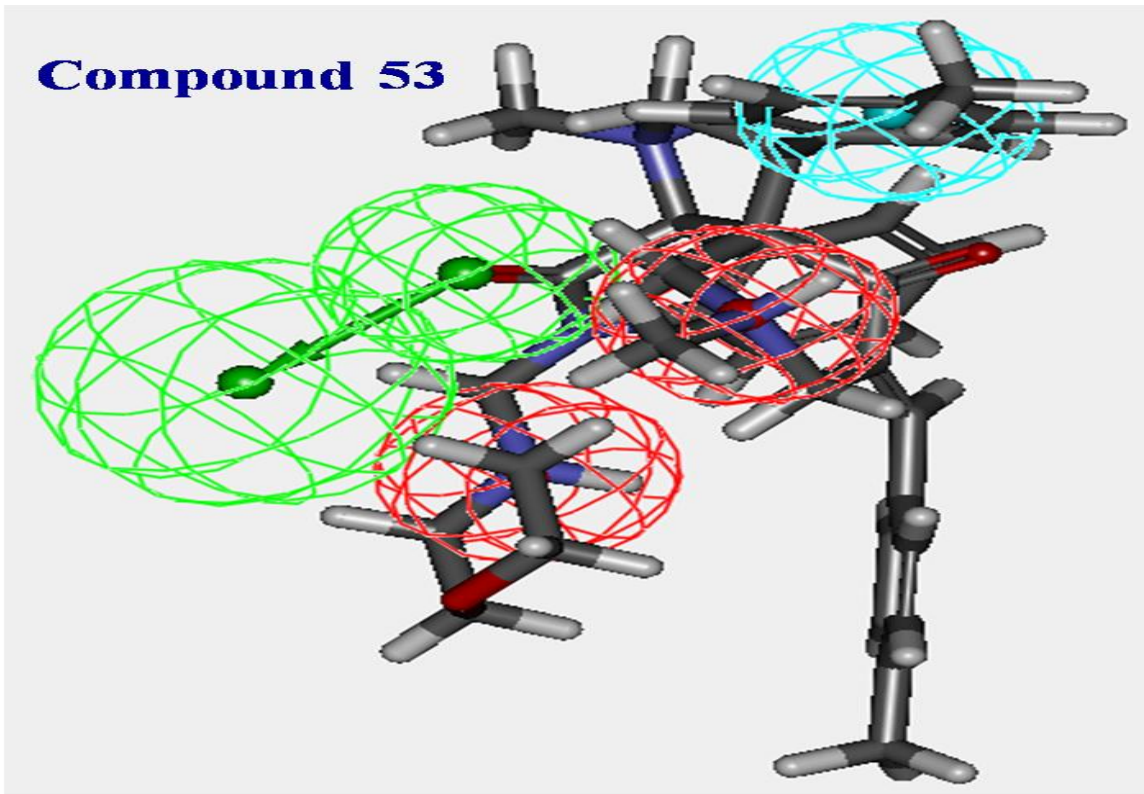

**Compound 54**

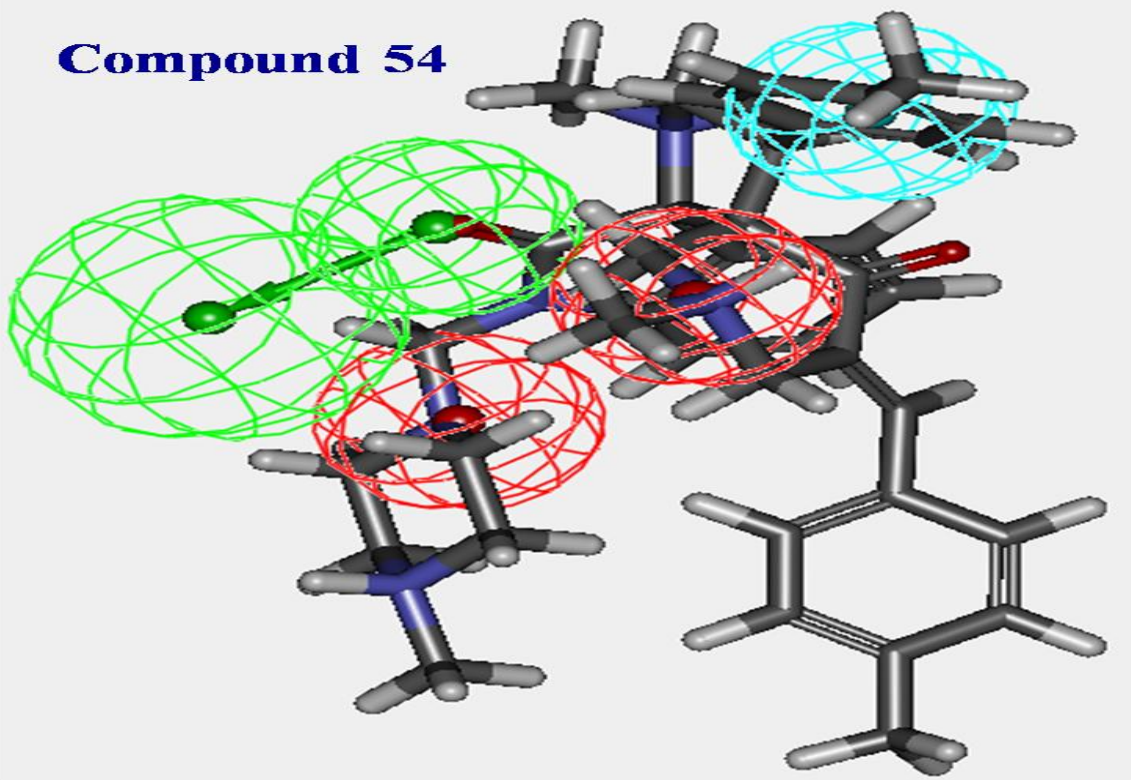

**Compound 55**

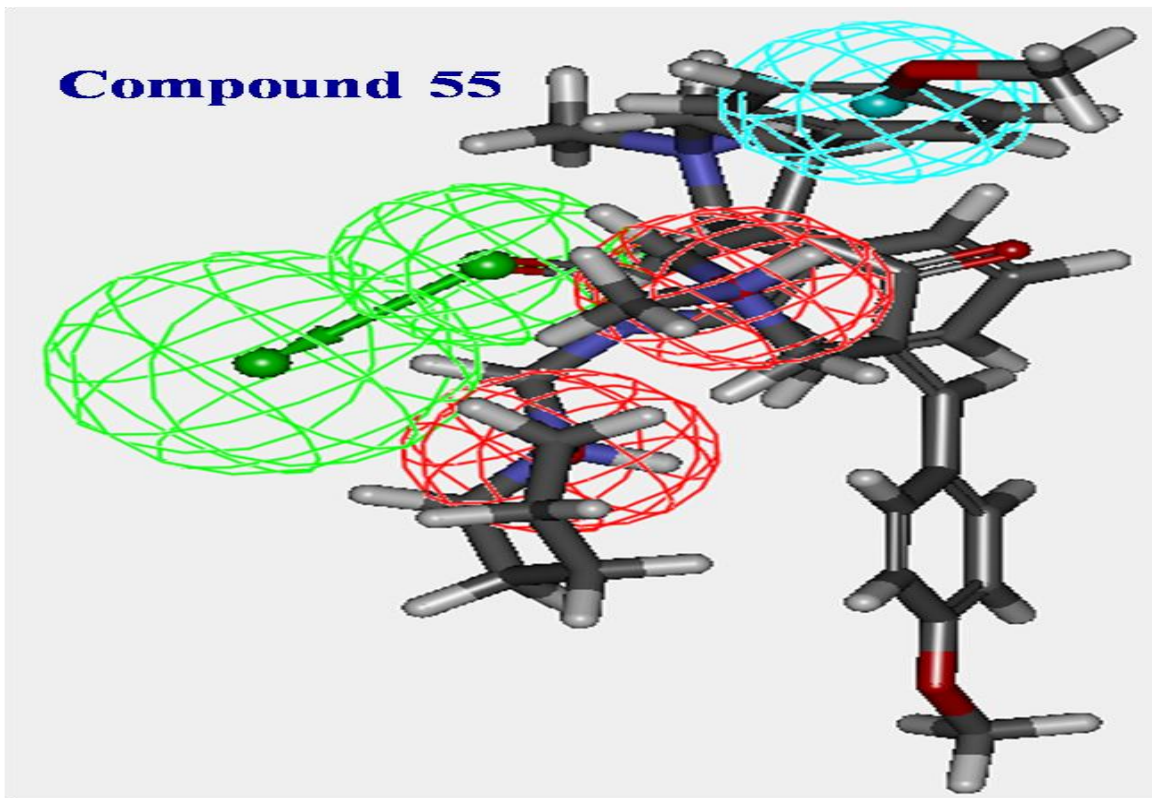

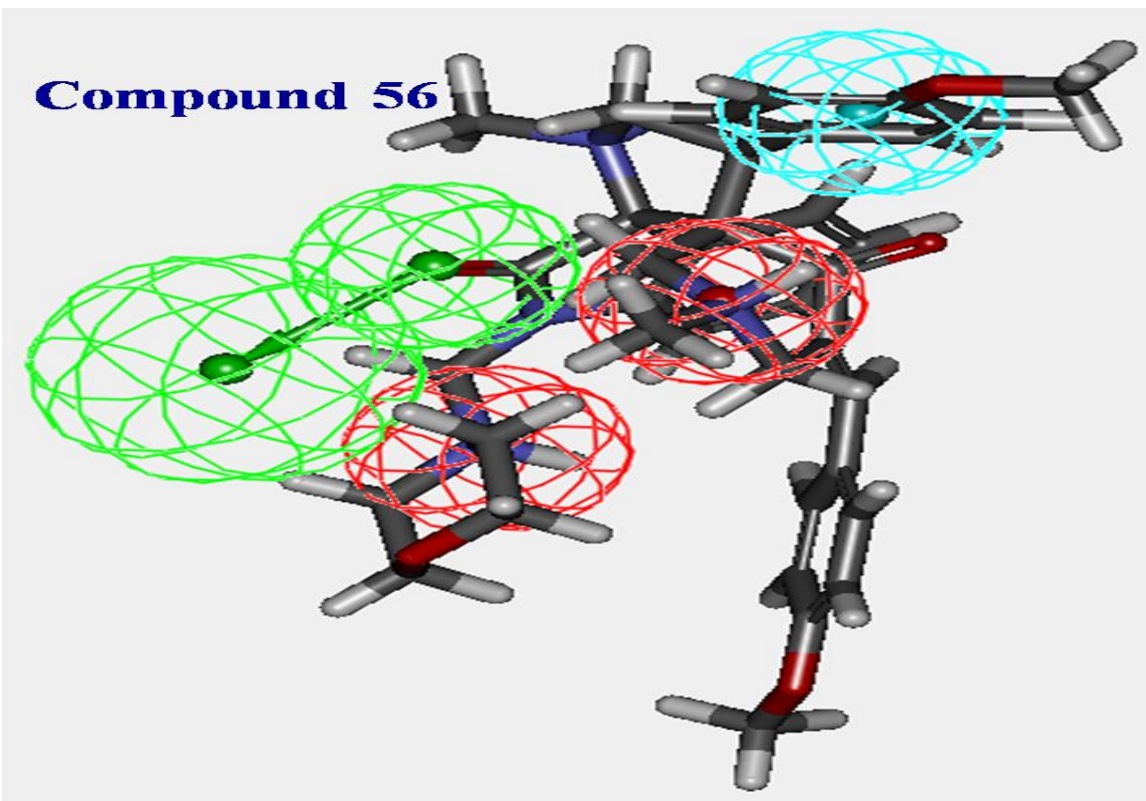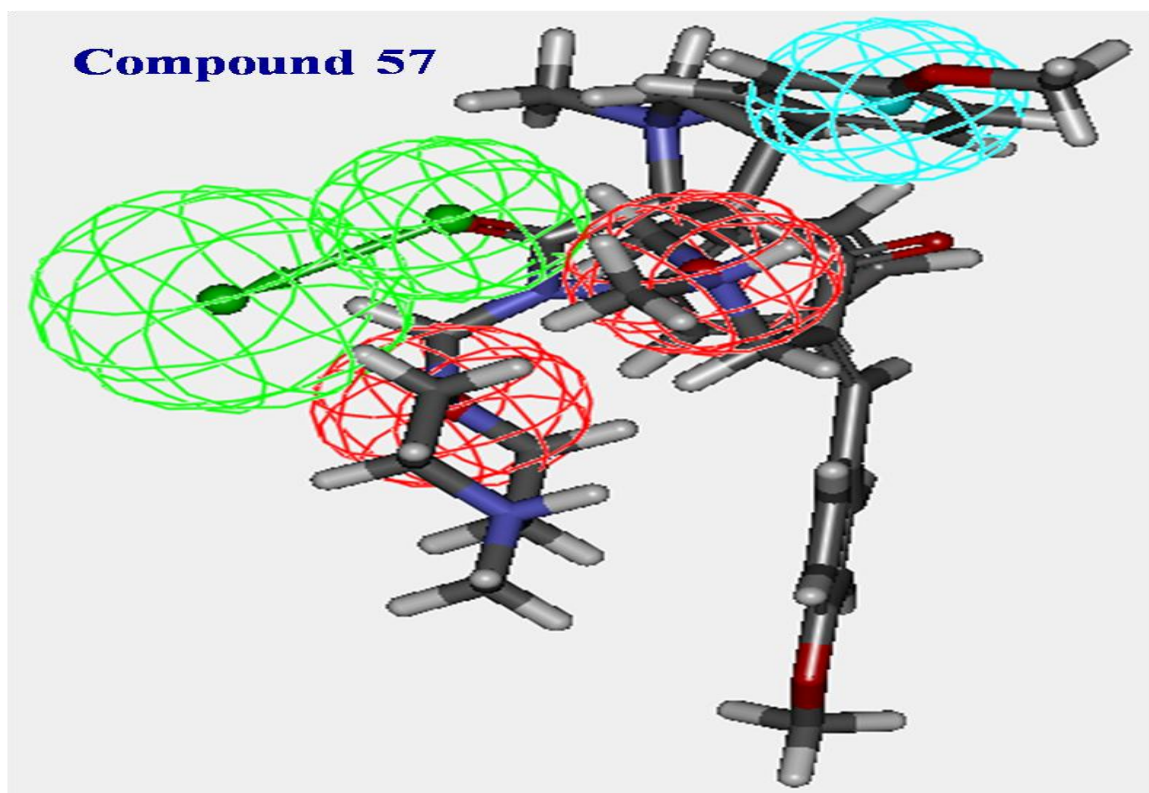

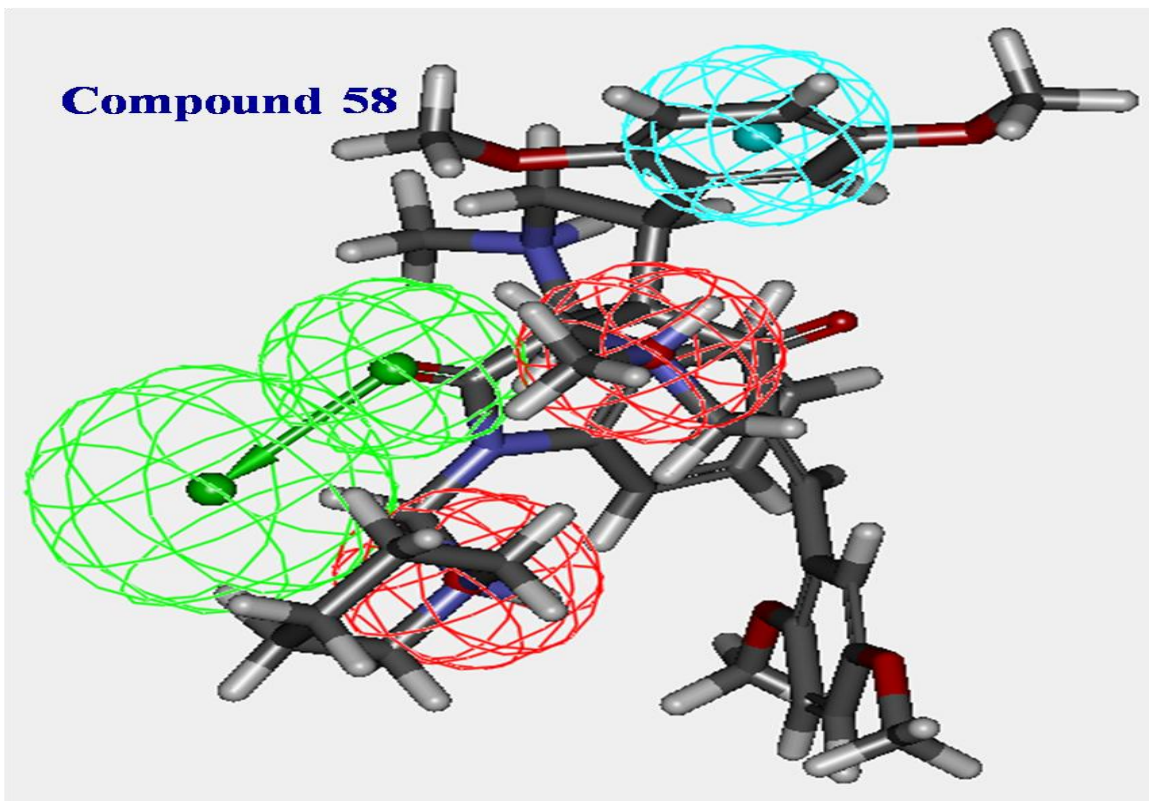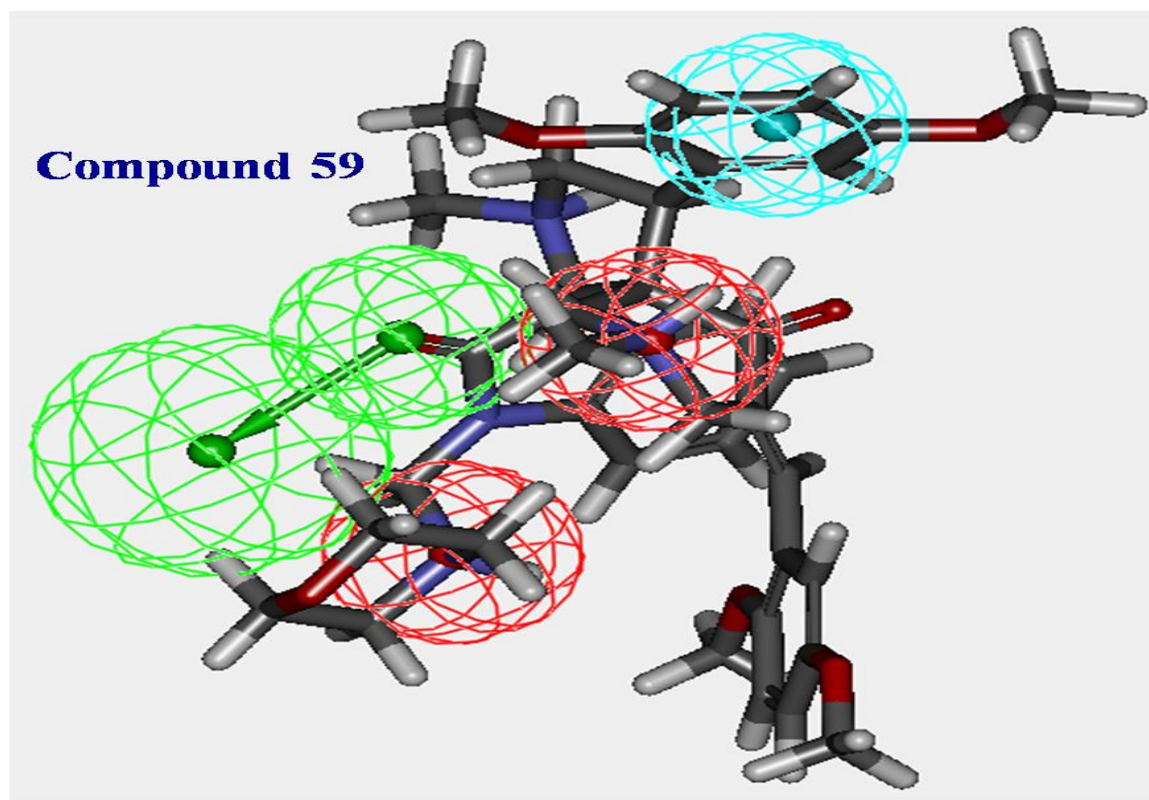

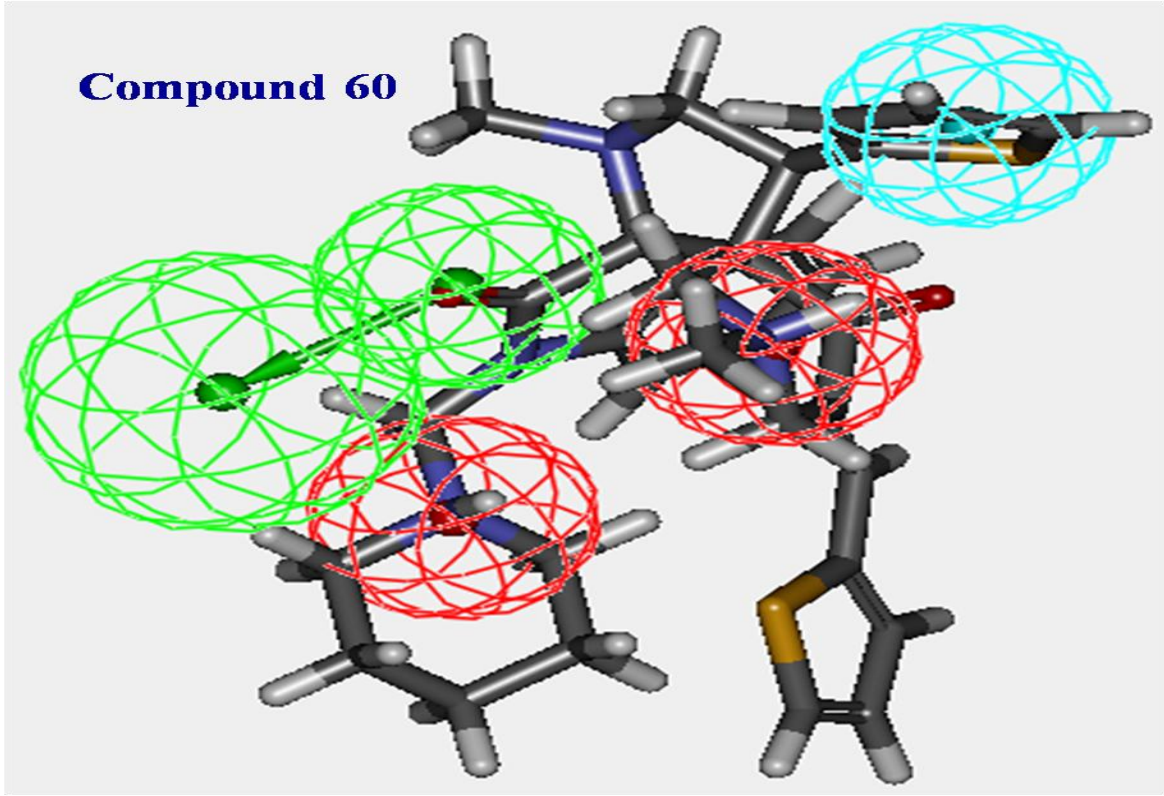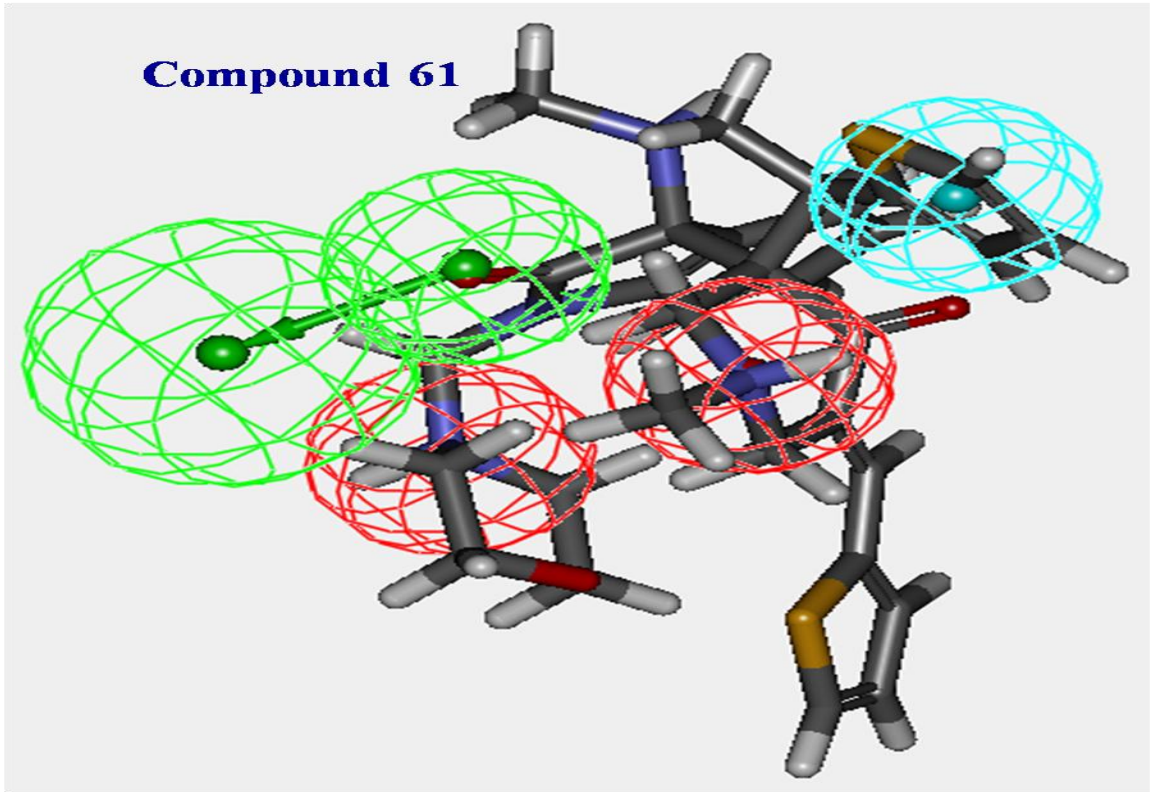

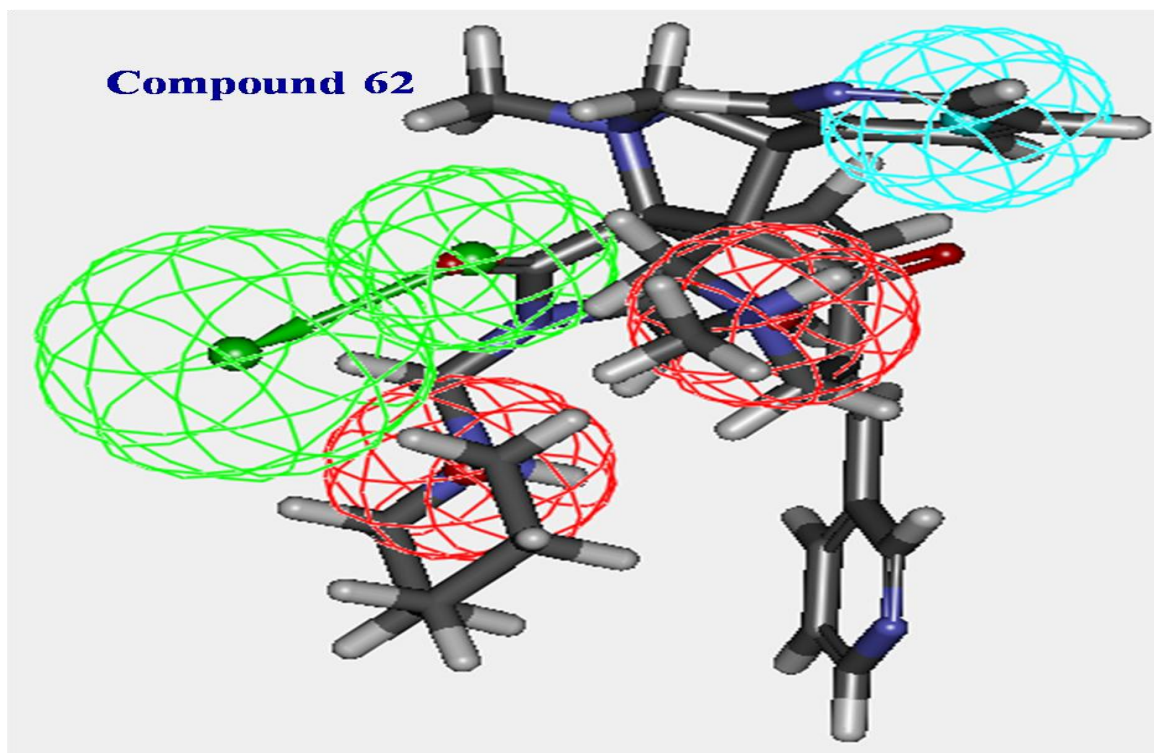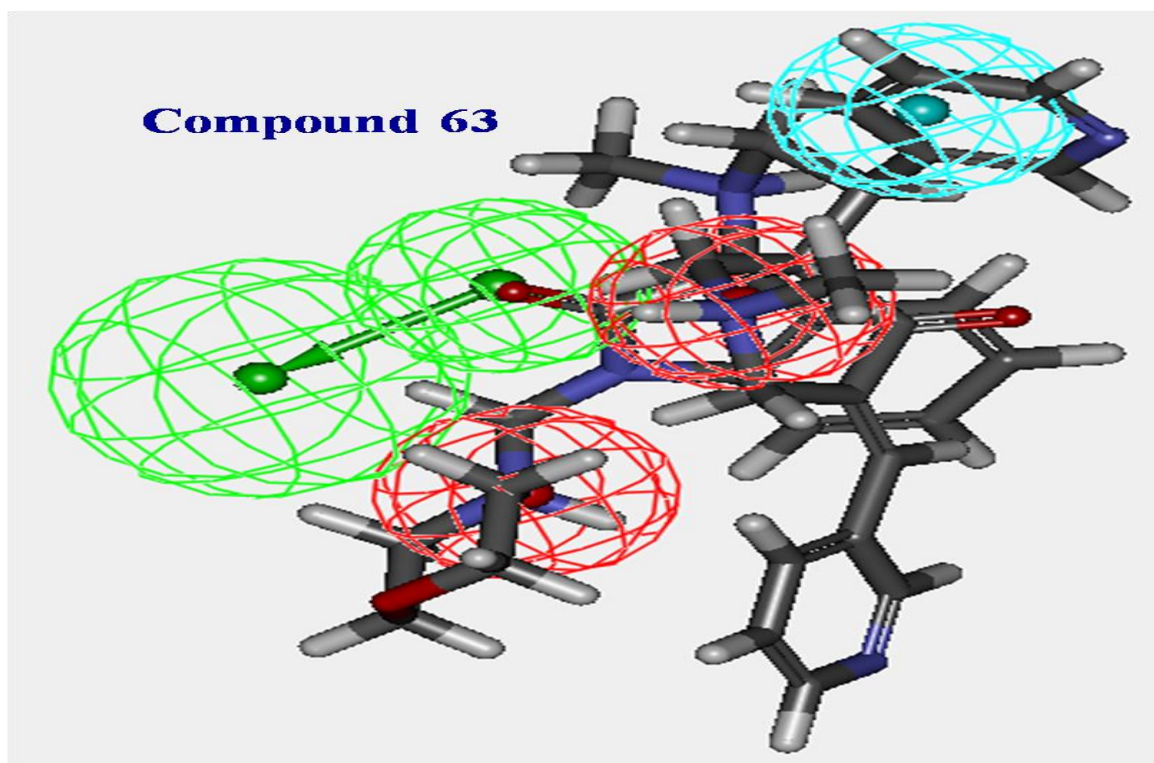

**Figure S117.** 3D-pharmacophore mapped on the synthesized bio-active spiro-compounds **30-63** against HeLa (cervical carcinoma) cell line.
